# Supplementary material for: Light Modulates Ethylene Synthesis, Signaling, and Downstream Transcriptional Networks to Control Plant Development
Source: Front Plant Sci. 2019 Sep 12;10:1094. doi: 10.3389/fpls.2019.01094 (PMC6751313; doi:10.3389/fpls.2019.01094)
Supplement: Supplemental Datasheet 1 — Extended methods for meta-analysis of ethylene-regulated transcripts and ethylene- and shade-regulated transcripts [file DataSheet_1.xlsx]

## Sheet: Root datasets
			Feng 2017			Harkey 2018			Stepanova 2007			Average		DE summary					EIN3 target?		ET-regulated, Chang et al.
Gene ID	Gene Description		logFC	p-value		logFC	p-value		logFC	p-value		logFC		Feng	Harkey	Stepanova	Gold standard		DAP-Seq	Chang et al.		ET role
AT5G19890	Peroxidase superfamily protein;(source:Araport11) protein_coding		6.19776	0.000401105		3.54592	0.0150584		6.4904	0.00153839		5.41136		UP	UP	UP	GOLD		YES	-	not reported	-
AT3G59900	Encodes ARGOS (Auxin-Regulated Gene Involved in Organ Size). Inducible by auxin. Involved in lateral organ size control. Transgenic plants expressing sense or antisense ARGOS cDNA display enlarged or reduced aerial organs, respectively. The alteration in organ size is attributable mainly to changes in cell number and the duration of organ growth. protein_coding AUXIN-REGULATED GENE INVOLVED IN OR…		4.88897	3.22e-07		2.941	4.06e-05		6.46298	8.41e-07		4.76432		UP	UP	UP	GOLD		YES	YES	YES	-
AT2G41230	Encodes an ER-localized plant hormone-responsive gene and appears to act redundantly with ARGOS and ARL during organ growth. Over-expression modifies plant sensitivity to ethylene, leading to improved drought tolerance. protein_coding ORGAN SIZE RELATED 1 (OSR1) ARGOS-LIKE2 (ARL2);ORGAN SIZE RELATED 1 (OSR1)		4.24676	1.85e-05		2.9352	0.000573607		5.09638	3.74e-05		4.09278		UP	UP	UP	GOLD		-	-	not reported	Other
AT5G40590	Cysteine/Histidine-rich C1 domain family protein;(source:Araport11) protein_coding		3.86442	0.000291821		4.04516	0.000455142		4.36137	0.000771149		4.09032		UP	UP	UP	GOLD		-	YES	YES	-
AT2G39980	HXXXD-type acyl-transferase family protein;(source:Araport11) protein_coding		4.62726	2.82e-05		2.96487	0.00114276		4.24947	0.000342504		3.9472		UP	UP	UP	GOLD		-	YES	YES	-
AT2G44080	Encodes ARL, a gene similar to ARGOS involved in cell expansion-dependent organ growth. Upregulated by brassinosteroid. Acts downstream of BRI1. The mRNA is cell-to-cell mobile. protein_coding ARGOS-LIKE (ARL) ARGOS-LIKE (ARL)		4.36871	8.95e-06		2.43136	0.00108469		3.90124	0.000142724		3.5671		UP	UP	UP	GOLD		YES	YES	YES	-
AT5G53980	Encodes a homeodomain leucine zipper class I (HD-Zip I) protein. protein_coding HOMEOBOX PROTEIN 52 (HB52) HOMEOBOX PROTEIN 52 (HB52);HOMEOBOX PROTEIN 52 (ATHB52)		4.14942	2.28e-05		1.96934	0.00481197		3.3381	0.000713281		3.15228		UP	UP	UP	GOLD		-	YES	YES	-
AT4G38410	Dehydrin family protein;(source:Araport11) protein_coding		2.98639	0.000273605		2.76693	0.000866412		3.67818	0.000370328		3.14383		UP	UP	UP	GOLD		-	-	not reported	-
AT5G02760	Encodes a phosphatase that functions in sustaining proper leaf longevity and preventing early senescence by suppressing or perturbing SARK-mediated senescence signal transduction. protein_coding ARABIDOPSIS PP2C CLADE D 7 (APD7) SENESCENCE-SUPPRESSED 51 PROTEIN PHOSPHATASE (SSPP);ARABIDOPSIS PP2C CLADE D 7 (APD7)		5.02858	6.81e-07		2.02311	0.000978508		2.19147	0.00165412		3.08105		UP	UP	UP	GOLD		YES	YES	YES	-
AT5G20820	SAUR-like auxin-responsive protein family;(source:Araport11) protein_coding SMALL AUXIN UPREGULATED RNA 76 (SAUR76) (ATSAUR76);SMALL AUXIN UPREGULATED RNA 76 (SAUR76)		3.60716	4.59e-06		2.6102	0.000162944		2.75054	0.000246202		2.9893		UP	UP	UP	GOLD		-	YES	YES	-
AT2G19590	encodes a protein whose sequence is similar to 1-aminocyclopropane-1-carboxylate oxidase protein_coding ACC OXIDASE 1 (ACO1) (ATACO1);ACC OXIDASE 1 (ACO1)		2.67091	5.28e-06		2.23309	6.98e-05		3.27956	1.14e-05		2.72786		UP	UP	UP	GOLD		-	-	not reported	-
AT3G15370	member of Alpha-Expansin Gene Family. Naming convention from the Expansin Working Group (Kende et al, 2004. Plant Mol Bio) protein_coding EXPANSIN 12 (EXPA12) EXPANSIN 12 (ATEXPA12);EXPANSIN 12 (EXP12);EXPANSIN 12 (EXPA12); (ATHEXP ALPHA 1.24); (ATEXP12)		4.70571	3e-07		1.26318	0.00424972		1.83449	0.0015382		2.60112		UP	UP	UP	GOLD		-	-	not reported	-
AT2G47550	Plant invertase/pectin methylesterase inhibitor superfamily;(source:Araport11) protein_coding		3.15716	0.000621933		1.9356	0.014825		2.32075	0.016854		2.47117		UP	UP	UP	GOLD		YES	-	not reported	-
AT2G26070	Encodes a predicted membrane protein. Similar sequences are widely distributed and conserved in plants, animals and protists but absent in fungi and prokaryotes. The sequence has no known motifs and no biological function has been assigned in any species. In Arabidopsis, it appears to be involved in the negative regulation of the response to ethylene, is localized to the Golgi and is a positive r…		2.99763	1.07e-06		1.08538	0.00235633		2.92033	1.14e-05		2.33445		UP	UP	UP	GOLD		-	YES	YES	Signaling
AT2G42850	cytochrome P450, family 718;(source:Araport11) protein_coding "CYTOCHROME P450, FAMILY 718" (CYP718) "CYTOCHROME P450, FAMILY 718" (CYP718)		2.49061	0.000255952		1.18154	0.0282549		3.20299	0.000266165		2.29171		UP	UP	UP	GOLD		YES	-	not reported	-
AT3G23150	Involved in ethylene perception in Arabidopsis The mRNA is cell-to-cell mobile. protein_coding ETHYLENE RESPONSE 2 (ETR2) ETHYLENE RESPONSE 2 (ETR2)		2.20858	0.000125237		1.80303	0.000971992		2.79495	0.000144542		2.26885		UP	UP	UP	GOLD		YES	YES	YES	Receptor
AT1G76470	NAD(P)-binding Rossmann-fold superfamily protein;(source:Araport11) protein_coding		2.06533	2.64e-05		0.753824	0.0224625		3.70172	3.29e-06		2.17363		UP	UP	UP	GOLD		-	-	not reported	-
AT3G11210	SGNH hydrolase-type esterase superfamily protein;(source:Araport11) protein_coding		2.19925	2.82e-06		0.767374	0.00615091		3.45946	1.37e-06		2.14203		UP	UP	UP	GOLD		-	-	not reported	-
AT5G48175	transmembrane protein;(source:Araport11) protein_coding		3.18069	3.15e-06		0.816584	0.0320139		2.38991	0.000179944		2.12906		UP	UP	UP	GOLD		-	YES	YES	-
AT3G51410	hypothetical protein (DUF241);(source:Araport11) protein_coding		4.57882	5.31e-08		0.794995	0.0113058		0.873527	0.0204426		2.08245		UP	UP	UP	GOLD		-	-	not reported	-
AT2G43140	bHLH129 is a nuclear localized basic helix loop helix protein. It has been shown to function as a transcriptional repressor. Overexpression of bHLH129 regulates root elongation and ABA response. protein_coding (BHLH129) (BHLH129)		1.40488	0.00103395		2.67664	3.6e-05		1.95724	0.000672475		2.01292		UP	UP	UP	GOLD		-	YES	YES	-
AT5G01210	HXXXD-type acyl-transferase family protein;(source:Araport11) protein_coding		1.85072	0.000884752		1.72097	0.00210289		2.37535	0.000913497		1.98235		UP	UP	UP	GOLD		YES	YES	YES	-
AT2G28690	TOX high mobility group box protein, putative (DUF1635);(source:Araport11) protein_coding		2.06083	0.000372197		1.3699	0.00659296		2.51335	0.000582148		1.98136		UP	UP	UP	GOLD		YES	YES	not detected	-
AT3G25730	ethylene response DNA binding factor 3;(source:Araport11) protein_coding ETHYLENE RESPONSE DNA BINDING FACTOR 3 (EDF3) ETHYLENE RESPONSE DNA BINDING FACTOR 3 (EDF3)		2.21524	0.000331849		1.5392	0.00446157		2.15372	0.00209851		1.96939		UP	UP	UP	GOLD		-	YES	YES	TF
AT1G04310	encodes an ethylene receptor related to bacterial two-component histidine kinases. protein_coding ETHYLENE RESPONSE SENSOR 2 (ERS2) ETHYLENE RESPONSE SENSOR 2 (ERS2)		2.06549	3.5e-06		0.522068	0.0365031		3.17576	1.54e-06		1.92111		UP	UP	UP	GOLD		YES	YES	YES	Receptor
AT2G31180	Member of the R2R3 factor gene family. protein_coding MYB DOMAIN PROTEIN 14 (MYB14) ARABIDOPSIS THALIANA MYB DOMAIN PROTEIN 14 (ATMYB14);MYB DOMAIN PROTEIN 14 (MYB14); (MYB14AT)		2.16649	1.26e-05		1.13214	0.00198458		2.46289	3.8e-05		1.92051		UP	UP	UP	GOLD		-	YES	YES	-
AT1G33790	jacalin lectin family protein;(source:Araport11) protein_coding		2.83428	8.21e-06		1.42432	0.00175859		1.49441	0.00412728		1.91767		UP	UP	UP	GOLD		-	YES	no	-
AT5G64110	Peroxidase superfamily protein;(source:Araport11) protein_coding		1.49772	0.033645		1.81907	0.0160471		2.40638	0.0111079		1.90772		UP	UP	UP	GOLD		-	-	not reported	-
AT4G14640	encodes a divergent member of calmodulin, which is an EF-hand family of Ca2+-binding proteins. This gene is expressed in leaves, flowers and siliques. The gene functionally complements yeast calmodulin 1 (CAM1). Also the protein does not form formed a complex with a basic amphiphilic helical peptide in the presence of Ca2+ in vitro. Authors suggest that this gene may represent a Ca2+-binding sens…		2.4603	7.88e-05		0.998862	0.0276724		2.25925	0.000872774		1.90614		UP	UP	UP	GOLD		YES	-	not reported	-
AT5G39610	Encodes a NAC-domain transcription factor. Positively regulates aging-induced cell death and senescence in leaves. This gene is upregulated in response to salt stress in wildtype as well as NTHK1 transgenic lines although in the latter case the induction was drastically reduced. It was also upregulated by ABA, ACC and NAA treatment, although in the latter two cases, the induction occurred relativ…		2.29845	0.000777114		1.23439	0.0340122		2.04358	0.00728358		1.85881		UP	UP	UP	GOLD		-	YES	YES	-
AT1G72360	Encodes a member of the ERF (ethylene response factor) subfamily B-2 of ERF/AP2 transcription factor family. The protein contains one AP2 domain. There are 5 members in this subfamily including RAP2.2 AND RAP2.12. protein_coding ETHYLENE RESPONSE FACTOR 73 (ERF73) ETHYLENE RESPONSE FACTOR 73 (ERF73); (AtERF73);HYPOXIA RESPONSIVE ERF (ETHYLENE RESPONSE FACTOR) 1 (HRE1)		1.659	0.00926501		2.13596	0.0028424		1.68298	0.0321005		1.82598		UP	UP	UP	GOLD		-	-	not reported	TF
AT2G16060	Encodes a class 1 nonsymbiotic hemoglobin induced by low oxygen levels with very high oxygen affinity. It is not likely to be a hemoglobin transporter because of its extremely high affinity for oxygen. Overexpression impairs cold stress-induced nitric oxide (NO) production. protein_coding HEMOGLOBIN 1 (HB1) HEMOGLOBIN 1 (HB1);PHYTOGLOBIN 1 (PGB1);CLASS I HEMOGLOBIN (GLB1); (ATGLB1); (ARATH GLB1);…		1.85521	0.00260836		1.56077	0.00892131		1.84931	0.0112618		1.7551		UP	UP	UP	GOLD		YES	-	not reported	-
AT3G27650	LOB domain-containing protein 25;(source:Araport11) protein_coding LOB DOMAIN-CONTAINING PROTEIN 25 (LBD25) LOB DOMAIN-CONTAINING PROTEIN 25 (LBD25)		0.860207	0.00386333		0.742643	0.0111189		3.4067	2.04e-06		1.66985		UP	UP	UP	GOLD		YES	-	not reported	-
AT4G15550	UDP-glucose:indole-3-acetate beta-D-glucosyltransferase protein_coding INDOLE-3-ACETATE BETA-D-GLUCOSYLTRANSFERASE (IAGLU) INDOLE-3-ACETATE BETA-D-GLUCOSYLTRANSFERASE (IAGLU)		2.26291	2.09e-05		0.78428	0.0247402		1.95746	0.000370328		1.66821		UP	UP	UP	GOLD		-	YES	YES	-
AT3G54040	PAR1 protein;(source:Araport11) protein_coding		1.47696	0.00934681		1.83338	0.00345167		1.60772	0.0221971		1.63935		UP	UP	UP	GOLD		-	YES	YES	-
AT5G25190	encodes a member of the ERF (ethylene response factor) subfamily B-6 of ERF/AP2 transcription factor family. The protein contains one AP2 domain. There are 12 members in this subfamily including RAP2.11. protein_coding ETHYLENE AND SALT INDUCIBLE 3 (ESE3) ETHYLENE AND SALT INDUCIBLE 3 (ESE3)		2.90255	4.82e-07		0.585507	0.0287913		1.20471	0.00162607		1.56425		UP	UP	UP	GOLD		YES	YES	YES	TF
AT3G52340	sucrose-phosphatase (SPP2) protein_coding SUCROSE-6F-PHOSPHATE PHOSPHOHYDROLASE 2 (SPP2) SUCROSE-PHOSPHATASE 2 (ATSPP2);SUCROSE-6F-PHOSPHATE PHOSPHOHYDROLASE 2 (SPP2)		1.84423	4.38e-05		0.648177	0.0372232		2.17214	9.19e-05		1.55485		UP	UP	UP	GOLD		-	YES	no	-
AT3G19200	hypothetical protein;(source:Araport11) protein_coding		1.58865	0.000863447		1.04629	0.0131752		2.00372	0.000953054		1.54622		UP	UP	UP	GOLD		-	YES	YES	-
AT5G25350	Arabidopsis thaliana EIN3-binding F-box protein 2 (EBF2) mRNA. Part of the SCF complex, it is located in the nucleus and is involved in the ethylene-response pathway. protein_coding EIN3-BINDING F BOX PROTEIN 2 (EBF2) EIN3-BINDING F BOX PROTEIN 2 (EBF2)		1.7479	0.00018409		1.23455	0.00256525		1.56636	0.00206778		1.51627		UP	UP	UP	GOLD		YES	YES	YES	Signaling
AT4G21400	Encodes a cysteine-rich receptor-like protein kinase. protein_coding CYSTEINE-RICH RLK (RECEPTOR-LIKE PROTEIN KINASE) 28 (CRK28) CYSTEINE-RICH RLK (RECEPTOR-LIKE PROTEIN KINASE) 28 (CRK28)		1.47259	4.1e-05		2.05328	1.31e-05		1.00927	0.00303182		1.51171		UP	UP	UP	GOLD		-	-	not reported	-
AT3G10120	hypothetical protein;(source:Araport11) protein_coding		1.73917	0.000431279		0.822737	0.0412964		1.8329	0.00159859		1.46494		UP	UP	UP	GOLD		-	YES	YES	-
AT1G77380	Amino acid permease which transports basic amino acids. protein_coding AMINO ACID PERMEASE 3 (AAP3) (ATAAP3);AMINO ACID PERMEASE 3 (AAP3)		1.10098	0.02864		1.47433	0.00771806		1.7763	0.00880171		1.45054		UP	UP	UP	GOLD		-	-	not reported	-
AT5G12170	Encodes one of the CRT-Like transporters (CLT1/AT5G19380, CLT2/AT4G24460, CLT3/AT5G12170). Required for glutathione homeostasis and stress responses. Mutants lacking these transporters are heavy metal-sensitive, glutathione(GSH)-deficient, and hypersensitive to Phytophthora infection. The mRNA is cell-to-cell mobile. protein_coding CRT (CHLOROQUINE-RESISTANCE TRANSPORTER)-LIKE TRANSPORTER 3 (CLT3…		1.71505	0.000357733		1.11462	0.00683207		1.47128	0.00475671		1.43365		UP	UP	UP	GOLD		YES	YES	YES	-
AT1G62380	Encodes a protein similar to 1-aminocyclopropane-1-carboxylic oxidase (ACC oxidase). Expression of the AtACO2 transcripts is affected by ethylene. protein_coding ACC OXIDASE 2 (ACO2) ACC OXIDASE 2 (ACO2); (ATACO2)		2.03424	0.000133363		1.02413	0.0131713		1.17547	0.0182974		1.41128		UP	UP	UP	GOLD		-	YES	YES	Synthesis
AT1G25560	Encodes a member of the RAV transcription factor family that contains AP2 and B3 binding domains. Involved in the regulation of flowering under long days. Loss of function results in early flowering. Overexpression causes late flowering and repression of expression of FT. Novel transcriptional regulator involved in ethylene signaling. Promoter bound by EIN3. EDF1 in turn, binds to promoter elemen…		1.86279	0.000479218		0.972723	0.0280575		1.37015	0.0141835		1.40189		UP	UP	UP	GOLD		YES	YES	YES	TF
AT5G03670	histone-lysine N-methyltransferase SETD1B-like protein;(source:Araport11) protein_coding TON1 RECRUITING MOTIF 28 (TRM28) TON1 RECRUITING MOTIF 28 (TRM28)		1.75883	0.000106809		0.931051	0.00826727		1.43208	0.00228013		1.37399		UP	UP	UP	GOLD		-	-	not reported	-
AT4G03140	NAD(P)-binding Rossmann-fold superfamily protein;(source:Araport11) protein_coding		0.945131	0.000621933		0.892692	0.00141036		2.25195	1.14e-05		1.36326		UP	UP	UP	GOLD		-	YES	YES	-
AT4G21680	Encodes a nitrate transporter (NRT1.8). Functions in nitrate removal from the xylem sap. Mediates cadmium tolerance. protein_coding NRT1/ PTR FAMILY 7.2 (NPF7.2) NITRATE TRANSPORTER 1.8 (NRT1.8);NRT1/ PTR FAMILY 7.2 (NPF7.2); (ATNPF7.2)		1.73932	0.000584178		1.16688	0.00864201		1.05048	0.0443159		1.31889		UP	UP	UP	GOLD		YES	-	not reported	-
AT3G21510	Encodes AHP1, one of the six Arabidopsis thaliana histidine phosphotransfer proteins (AHPs). AHPs function as redundant positive regulators of cytokinin signaling. Members of the AHP gene family include: AT3G21510 (AHP1), AT3G29350 (AHP2), AT5G39340 (AHP3), AT3G16360 (AHP4), AT1G03430 (AHP5) and AT1G80100 (AHP6). protein_coding HISTIDINE-CONTAINING PHOSPHOTRANSMITTER 1 (AHP1) HISTIDINE-CONTAINING…		1.50288	0.000445074		1.11122	0.0040657		1.30323	0.00538281		1.30578		UP	UP	UP	GOLD		-	YES	YES	-
AT3G23030	auxin inducible gene expressed in the nucleus protein_coding INDOLE-3-ACETIC ACID INDUCIBLE 2 (IAA2) INDOLE-3-ACETIC ACID INDUCIBLE 2 (IAA2)		1.59751	0.000743361		1.13121	0.00780024		1.00046	0.0443159		1.24306		UP	UP	UP	GOLD		YES	YES	no	-
AT1G50110	Encodes a cytosolic branched-chain aminotransferase that acts on Leu, Ile, Val and also on Met. Together with BCAT4 and BCAT3, it is involved in methionine salvage and glucosinolate biosynthesis. protein_coding BRANCHED-CHAIN AMINOTRANSFERASE 6 (BCAT6) BRANCHED-CHAIN AMINOTRANSFERASE 6 (BCAT6)		0.858375	0.00137961		1.1672	0.000394115		1.66199	9.19e-05		1.22919		UP	UP	UP	GOLD		YES	YES	YES	-
AT3G22750	Protein kinase superfamily protein;(source:Araport11) protein_coding		1.14672	0.000256495		1.28157	0.000278838		1.21865	0.000941152		1.21564		UP	UP	UP	GOLD		-	YES	YES	-
AT5G49620	Member of the R2R3 factor gene family. protein_coding MYB DOMAIN PROTEIN 78 (MYB78) MYB DOMAIN PROTEIN 78 (MYB78)		1.56051	0.000455162		0.72158	0.0472802		1.25932	0.00807136		1.18047		UP	UP	UP	GOLD		-	YES	not detected	-
AT5G57920	early nodulin-like protein 10;(source:Araport11) protein_coding EARLY NODULIN-LIKE PROTEIN 10 (ENODL10) (AtENODL10);EARLY NODULIN-LIKE PROTEIN 10 (ENODL10)		1.29372	0.000855804		0.765803	0.0232297		1.44508	0.00209851		1.1682		UP	UP	UP	GOLD		-	YES	YES	-
AT5G43170	Encodes zinc finger protein. mRNA levels are elevated in response to high salinity and low temperature. The protein is localized to the nucleus and acts as a transcriptional repressor. protein_coding ZINC-FINGER PROTEIN 3 (ZF3) ZINC-FINGER PROTEIN 3 (ZF3);ZINC-FINGER PROTEIN 3 (AZF3)		0.944246	0.000971798		1.09819	0.00071265		1.2838	0.000743448		1.10875		UP	UP	UP	GOLD		-	-	not reported	-
AT4G30420	nodulin MtN21-like transporter family protein protein_coding USUALLY MULTIPLE ACIDS MOVE IN AND OUT TRANSPORTERS 34 (UMAMIT34) USUALLY MULTIPLE ACIDS MOVE IN AND OUT TRANSPORTERS 34 (UMAMIT34)		1.00232	0.00113813		0.942177	0.00241078		1.32628	0.000953054		1.09026		UP	UP	UP	GOLD		-	YES	YES	-
AT1G60000	RNA-binding (RRM/RBD/RNP motifs) family protein;(source:Araport11) protein_coding		1.07779	0.00116657		0.647838	0.0270844		1.53692	0.000652977		1.08752		UP	UP	UP	GOLD		-	-	not reported	-
AT1G25530	Transmembrane amino acid transporter family protein;(source:Araport11) protein_coding		1.39649	0.000259248		1.09533	0.00199818		0.751648	0.043565		1.08115		UP	UP	UP	GOLD		-	-	not reported	-
AT2G40940	Ethylene receptor, subfamily 1. Has histidine kinase activity. protein_coding ETHYLENE RESPONSE SENSOR 1 (ERS1) ETHYLENE RESPONSE SENSOR (ERS);ETHYLENE RESPONSE SENSOR 1 (ERS1)		1.13581	0.00430085		0.855914	0.0254286		1.19334	0.0135199		1.06169		UP	UP	UP	GOLD		YES	YES	YES	Receptor
AT5G40100	Disease resistance protein (TIR-NBS-LRR class) family;(source:Araport11) protein_coding		0.776645	0.0104404		0.621009	0.0396528		1.76322	0.000333076		1.05363		UP	UP	UP	GOLD		-	-	not reported	-
AT3G14230	encodes a member of the ERF (ethylene response factor) subfamily B-2 of ERF/AP2 transcription factor family (RAP2.2). The protein contains one AP2 domain. There are 5 members in this subfamily including RAP2.2 AND RAP2.12. protein_coding RELATED TO AP2 2 (RAP2.2) RELATED TO AP2 2 (RAP2.2)		1.25999	0.000789159		0.931212	0.00663451		0.880014	0.0268021		1.02374		UP	UP	UP	GOLD		-	YES	YES	TF
AT5G13330	encodes a member of the ERF (ethylene response factor) subfamily B-4 of ERF/AP2 transcription factor family. The protein contains one AP2 domain. There are 7 members in this subfamily. protein_coding RELATED TO AP2 6L (Rap2.6L) RELATED TO AP2 6L (Rap2.6L)		1.36072	2.95e-05		0.837973	0.00141036		0.78671	0.00618375		0.995133		UP	UP	UP	GOLD		YES	YES	YES	TF
AT2G42280	basic helix-loop-helix (bHLH) DNA-binding superfamily protein;(source:Araport11) protein_coding FLOWERING BHLH 4 (FBH4) ABA-RESPONSIVE KINASE SUBSTRATE 3 (AKS3);FLOWERING BHLH 4 (FBH4)		0.586192	0.00480327		1.65146	1.31e-05		0.747487	0.00510075		0.995046		UP	UP	UP	GOLD		-	YES	no	-
AT5G10950	Tudor/PWWP/MBT superfamily protein;(source:Araport11) protein_coding		0.773458	0.0136496		0.789526	0.015016		1.3767	0.00209851		0.979894		UP	UP	UP	GOLD		-	-	not reported	-
AT5G03730	Homologous to the RAF family of serine/threonine protein kinases. Negative regulator in the ethylene signal transduction pathway. Interacts with the putative ethylene receptors ETR1 and ERS. Constitutively expressed. protein_coding CONSTITUTIVE TRIPLE RESPONSE 1 (CTR1) CONSTITUTIVE TRIPLE RESPONSE 1 (CTR1); (AtCTR1);SUGAR-INSENSITIVE 1 (SIS1)		1.05286	0.00129028		0.577265	0.0445848		1.30801	0.00159859		0.979378		UP	UP	UP	GOLD		-	YES	YES	Signaling
AT3G22800	Leucine-rich repeat (LRR) family protein;(source:Araport11) protein_coding		0.755089	0.0211779		1.14905	0.002729		0.994792	0.018067		0.966311		UP	UP	UP	GOLD		-	YES	YES	-
AT4G27900	CCT motif family protein;(source:Araport11) protein_coding		1.22113	0.000423896		0.559648	0.0471038		1.08018	0.00467576		0.953653		UP	UP	UP	GOLD		-	-	not reported	-
AT5G05880	Encodes a nicotinate-N-glycosyltransferase. protein_coding UDP-GLUCOSYL TRANSFERASE 76C4 (UGT76C4) UDP-GLUCOSYL TRANSFERASE 76C4 (UGT76C4)		0.839627	0.00348693		0.766918	0.00733944		1.20502	0.00176491		0.937188		UP	UP	UP	GOLD		-	YES	YES	-
AT5G57710	SMAX1 (SUPPRESSOR OF MAX2 1) is a member of an eight-gene family in Arabidopsis that has weak similarity to AtHSP101, a ClpB chaperonin required for thermotolerance. SMAX1 is an important component of KAR/SL signaling during seed germination and seedling growth, but is not necessary for all MAX2-dependent responses. The mRNA is cell-to-cell mobile. protein_coding SUPPRESSOR OF MAX2 1 (SMAX1) SUPP…		0.949754	0.0102632		0.885114	0.0186134		0.912716	0.0454627		0.915862		UP	UP	UP	GOLD		-	YES	YES	-
AT1G51800	The gene encodes a putative member of the LRR-RLK protein family. Expressin and mutant analysis revealed that it contributes to the interaction between Arabidopsis and Hyaloperonospora arabidopsidis. and The mRNA is cell-to-cell mobile. protein_coding IMPAIRED OOMYCETE SUSCEPTIBILITY 1 (IOS1) IMPAIRED OOMYCETE SUSCEPTIBILITY 1 (IOS1)		0.720277	0.00119123		1.2533	7.51e-05		0.741783	0.00472432		0.90512		UP	UP	UP	GOLD		-	YES	YES	-
AT5G40540	Protein kinase superfamily protein;(source:Araport11) protein_coding		1.49904	6.91e-06		0.661181	0.00299783		0.550944	0.0255362		0.903723		UP	UP	UP	GOLD		-	-	not reported	-
AT3G25740	Encodes a plastid localized methionine aminopeptidase. Formerly called MAP1C, now called MAP1B. protein_coding METHIONINE AMINOPEPTIDASE 1C (MAP1B) METHIONINE AMINOPEPTIDASE 1C (MAP1C);METHIONINE AMINOPEPTIDASE 1C (MAP1B)		0.658833	0.0335161		0.868805	0.0102563		1.04733	0.011852		0.858322		UP	UP	UP	GOLD		-	-	not reported	-
AT5G43700	Auxin inducible protein similar to transcription factors. protein_coding AUXIN INDUCIBLE 2-11 (ATAUX2-11) INDOLE-3-ACETIC ACID INDUCIBLE 4 (IAA4);AUXIN INDUCIBLE 2-11 (ATAUX2-11)		1.05922	0.000289753		0.667253	0.00683207		0.778839	0.00931549		0.835104		UP	UP	UP	GOLD		YES	YES	no	-
AT3G26760	NAD(P)-binding Rossmann-fold superfamily protein;(source:Araport11) protein_coding		0.878016	0.00456219		0.671979	0.0247402		0.919748	0.0142676		0.823247		UP	UP	UP	GOLD		-	-	not reported	-
AT4G34740	Encodes glutamine 5-phosphoribosylpyrophosphate amidotransferase. Mutants are deficient in leaf, but not cotyledon, plastid and palisade cell development. Mutants exhibit defective chloroplast development under non-low light, suggesting that the defect in chloroplast development is caused by photo-oxidative damage. Plays role in differential development of vascular-associated cells. Demonstrates …		0.770809	0.00188611		0.886335	0.00124861		0.68874	0.0150949		0.781962		UP	UP	UP	GOLD		-	YES	no	-
AT1G50420	Encodes a scarecrow-like protein (SCL3) Putative transcription factors interacting with the gene product of VHA-B1 (vacuolar ATPase subunit B1; as shown through yeast two-hybrid assay). protein_coding SCARECROW-LIKE 3 (SCL3) SCARECROW-LIKE 3 (SCL-3);SCARECROW-LIKE 3 (SCL3)		0.700819	0.00398623		0.508123	0.0282731		0.623175	0.0292344		0.610706		UP	UP	UP	GOLD		YES	YES	YES	-
AT5G04120	Encodes a cofactor-dependent phosphoglycerate mutase (dPGM) - like protein with phosphoserine phosphatase activity that may be responsible for serine anabolism. protein_coding		-5.49147	1.56e-06		-3.50135	0.000161361		-3.52254	0.000292302		4.17179		DOWN	DOWN	DOWN	GOLD		-	-	not reported	-
AT3G59370	Vacuolar calcium-binding protein-like protein;(source:Araport11) protein_coding		-4.32623	4.59e-06		-1.93258	0.00223532		-2.91168	0.000582148		3.05683		DOWN	DOWN	DOWN	GOLD		-	-	not reported	-
AT4G25250	PMEI4 pectin methyleseterase inhibitor. Expressed in roots. protein_coding PECTINMETHYLESTERASE INHIBITOR 4 (PMEI4) PECTINMETHYLESTERASE INHIBITOR 4 (PMEI4)		-4.80865	8.99e-08		-1.80732	0.000278838		-2.38022	0.000100812		2.99873		DOWN	DOWN	DOWN	GOLD		-	-	not reported	-
AT2G20750	member of BETA-EXPANSINS. Naming convention from the Expansin Working Group (Kende et al, 2004. Plant Mol Bio) protein_coding EXPANSIN B1 (EXPB1) EXPANSIN B1 (ATEXPB1);EXPANSIN B1 (EXPB1); (ATHEXP BETA 1.5)		-3.56687	5.2e-07		-1.67403	0.000339127		-3.29347	1.05e-05		2.84479		DOWN	DOWN	DOWN	GOLD		-	-	not reported	-
AT3G19320	Leucine-rich repeat (LRR) family protein;(source:Araport11) protein_coding		-4.18819	5.2e-07		-0.805008	0.0382073		-3.41851	2.3e-05		2.8039		DOWN	DOWN	DOWN	GOLD		-	-	not reported	-
AT4G22460	Bifunctional inhibitor/lipid-transfer protein/seed storage 2S albumin superfamily protein;(source:Araport11) protein_coding		-4.85804	1.54e-06		-1.51627	0.00683207		-1.81665	0.00800767		2.73032		DOWN	DOWN	DOWN	GOLD		-	-	not reported	-
AT2G18800	xyloglucan endotransglucosylase/hydrolase 21;(source:Araport11) protein_coding XYLOGLUCAN ENDOTRANSGLUCOSYLASE/HYDROLASE 21 (XTH21) XYLOGLUCAN ENDOTRANSGLUCOSYLASE/HYDROLASE 21 (XTH21);XYLOGLUCAN ENDOTRANSGLUCOSYLASE/HYDROLASE 21 (ATXTH21)		-4.4647	3.55e-06		-1.4278	0.0111788		-1.66077	0.0150949		2.51776		DOWN	DOWN	DOWN	GOLD		-	-	not reported	-
AT3G21680	hypothetical protein;(source:Araport11) protein_coding		-2.66492	1.99e-07		-1.29741	0.000131632		-2.83753	1.37e-06		2.26662		DOWN	DOWN	DOWN	GOLD		-	-	not reported	-
AT5G42590	putative cytochrome P450 protein_coding CYTOCHROME P450, FAMILY 71, SUBFAMILY A, POLYPEPTIDE 16 (CYP71A16) MARNERAL OXIDASE (MRO);CYTOCHROME P450, FAMILY 71, SUBFAMILY A, POLYPEPTIDE 16 (CYP71A16)		-1.99635	0.0074269		-2.15985	0.00635662		-2.29589	0.013884		2.1507		DOWN	DOWN	DOWN	GOLD		-	-	not reported	-
AT4G01140	transmembrane protein, putative (DUF1191);(source:Araport11) protein_coding		-3.2003	1.13e-06		-1.29638	0.00130532		-1.88137	0.000370328		2.12602		DOWN	DOWN	DOWN	GOLD		-	-	not reported	-
AT5G42580	a member of the cytochrome P450 family protein_coding "CYTOCHROME P450, FAMILY 705, SUBFAMILY A, POLYPEPTIDE 12" (CYP705A12) "CYTOCHROME P450, FAMILY 705, SUBFAMILY A, POLYPEPTIDE 12" (CYP705A12)		-2.14155	0.0017612		-2.12427	0.00255792		-1.91242	0.01441		2.05941		DOWN	DOWN	DOWN	GOLD		-	-	not reported	-
AT5G24100	Leucine-rich repeat protein kinase family protein;(source:Araport11) protein_coding		-3.48081	1.25e-07		-1.01958	0.00139985		-1.67539	0.000172014		2.05859		DOWN	DOWN	DOWN	GOLD		-	-	not reported	-
AT3G25655	Similar to Inflorescence Deficient in Abscission (IDA). Involved in floral organ abscission. protein_coding INFLORESCENCE DEFICIENT IN ABSCISSION (IDA)-LIKE 1 (IDL1) INFLORESCENCE DEFICIENT IN ABSCISSION (IDA)-LIKE 1 (IDL1)		-2.28899	6.63e-05		-2.1491	0.000268476		-1.26168	0.0145101		1.89993		DOWN	DOWN	DOWN	GOLD		-	-	not reported	-
AT4G02290	glycosyl hydrolase 9B13;(source:Araport11) protein_coding GLYCOSYL HYDROLASE 9B13 (GH9B13) GLYCOSYL HYDROLASE 9B13 (AtGH9B13);GLYCOSYL HYDROLASE 9B13 (GH9B13)		-2.64034	1.84e-06		-0.91295	0.00439423		-2.1458	6.38e-05		1.8997		DOWN	DOWN	DOWN	GOLD		-	-	not reported	-
AT2G18980	Peroxidase superfamily protein;(source:Araport11) protein_coding		-3.69559	8.5e-08		-0.965115	0.00195481		-0.736898	0.0249137		1.7992		DOWN	DOWN	DOWN	GOLD		-	-	not reported	-
AT5G64620	Plant cell wall (CWI) and vacuolar invertases (VI) play important roles in carbohydrate metabolism, stress responses and sugar signaling. protein_coding CELL WALL / VACUOLAR INHIBITOR OF FRUCTOSIDASE 2 (C/VIF2) CELL WALL / VACUOLAR INHIBITOR OF FRUCTOSIDASE 2 (ATC/VIF2);CELL WALL / VACUOLAR INHIBITOR OF FRUCTOSIDASE 2 (C/VIF2)		-2.97968	4.63e-07		-0.70433	0.0121998		-1.57117	0.000334665		1.75173		DOWN	DOWN	DOWN	GOLD		-	-	not reported	-
AT4G15290	Encodes a gene similar to cellulose synthase. Mutants exhibit shorter root hairs under phosphate-deficient conditions. protein_coding (ATCSLB05) (CSLB05); (ATCSLB05);CELLULOSE SYNTHASE LIKE 5 (ATCSLB5)		-3.10662	4.96e-06		-1.09042	0.00858185		-1.03926	0.0336507		1.74543		DOWN	DOWN	DOWN	GOLD		-	-	not reported	-
AT4G23870	hypothetical protein;(source:Araport11) protein_coding		-2.46391	1.53e-06		-0.961226	0.00204287		-1.66928	0.000181866		1.69814		DOWN	DOWN	DOWN	GOLD		-	-	not reported	-
AT5G10430	Encodes arabinogalactan-protein (AGP4) that is expressed in female reproductive tissues. It is involved in promoting degeneration of the persistent synergid after fertilization. In mutant ovules, the persistent synergid does not degrade resulting in polytuby. protein_coding ARABINOGALACTAN PROTEIN 4 (AGP4) ARABINOGALACTAN PROTEIN 4 (AGP4); (ATAGP4); (JAGGER)		-2.99651	4.96e-06		-0.901507	0.0196521		-1.14082	0.016854		1.67961		DOWN	DOWN	DOWN	GOLD		-	-	not reported	-
AT5G08330	Circadian oscillator protein which interacts with bZIP63 and regulates a response of the circadian oscillator to sugar. Is not required for the sugar-induced circadian phase advance in the morning; regulates a response of CCA1 to sugars. protein_coding TCP DOMAIN PROTEIN 21 (TCP21) CCA1 HIKING EXPEDITION (CHE);TCP DOMAIN PROTEIN 11 (TCP11); (ATTCP21);TCP DOMAIN PROTEIN 21 (TCP21); (AtTCP11)		-2.02987	2.9e-06		-1.06845	0.000681216		-1.76149	6.38e-05		1.61994		DOWN	DOWN	DOWN	GOLD		-	-	not reported	-
AT2G17300	hypothetical protein;(source:Araport11) protein_coding		-2.14542	8.67e-06		-0.747563	0.0131752		-1.92057	0.00013612		1.60452		DOWN	DOWN	DOWN	GOLD		-	-	not reported	-
AT5G02230	Haloacid dehalogenase-like hydrolase (HAD) superfamily protein;(source:Araport11) protein_coding		-1.6147	0.00249972		-1.22583	0.0149771		-1.88296	0.00466051		1.5745		DOWN	DOWN	DOWN	GOLD		YES	YES	YES	-
AT3G12110	Encodes an actin that is expressed predominantly during reproductive development. protein_coding ACTIN-11 (ACT11) ACTIN-11 (ACT11)		-1.8133	6.47e-07		-0.923219	0.000268476		-1.73547	1.05e-05		1.49066		DOWN	DOWN	DOWN	GOLD		-	-	not reported	-
AT5G59220	Encodes a member of the PP2C family (Clade A protein phosphatases type 2C). Functions as a negative regulator of osmotic stress and ABA signaling. protein_coding HIGHLY ABA-INDUCED PP2C GENE 1 (HAI1) SENESCENCE ASSOCIATED GENE 113 (SAG113);HIGHLY ABA-INDUCED PP2C GENE 1 (HAI1)		-1.80351	0.00154399		-1.21669	0.0187199		-1.31268	0.0373615		1.44429		DOWN	DOWN	DOWN	GOLD		-	YES	YES	-
AT5G23400	Leucine-rich repeat (LRR) family protein;(source:Araport11) protein_coding		-1.83702	2.4e-05		-0.780042	0.00905156		-1.7077	0.000266165		1.44159		DOWN	DOWN	DOWN	GOLD		-	-	not reported	-
AT3G05900	neurofilament protein-like protein;(source:Araport11) protein_coding		-2.13197	4.03e-05		-1.04359	0.00648866		-1.11824	0.0135421		1.43127		DOWN	DOWN	DOWN	GOLD		-	-	not reported	-
AT4G00430	a member of the plasma membrane intrinsic protein subfamily PIP1. protein_coding PLASMA MEMBRANE INTRINSIC PROTEIN 1;4 (PIP1;4) TRANSMEMBRANE PROTEIN C (TMP-C);PLASMA MEMBRANE INTRINSIC PROTEIN 1E (PIP1E);PLASMA MEMBRANE INTRINSIC PROTEIN 1;4 (PIP1;4)		-1.64695	8.29e-05		-1.09663	0.0020422		-1.51556	0.000893072		1.41971		DOWN	DOWN	DOWN	GOLD		-	-	not reported	-
AT1G55330	Encodes a putative arabinogalactan-protein (AGP21). protein_coding ARABINOGALACTAN PROTEIN 21 (AGP21) ARABINOGALACTAN PROTEIN 21 (AtAGP21);ARABINOGALACTAN PROTEIN 21 (AGP21)		-2.4964	1.55e-05		-0.747004	0.0413114		-0.952306	0.0365561		1.39857		DOWN	DOWN	DOWN	GOLD		-	-	not reported	-
AT1G76240	DUF241 domain protein (DUF241);(source:Araport11) protein_coding		-2.37588	1.84e-06		-1.04154	0.00123536		-0.679812	0.0371407		1.36575		DOWN	DOWN	DOWN	GOLD		-	-	not reported	-
AT2G46150	Late embryogenesis abundant (LEA) hydroxyproline-rich glycoprotein family;(source:Araport11) protein_coding		-1.69553	4.07e-05		-0.660716	0.0214675		-1.60349	0.000370328		1.31991		DOWN	DOWN	DOWN	GOLD		-	-	not reported	-
AT5G15150	homeobox-containing gene with an unusual feature: a leucine zipper motif adjacent to the carboxyl-terminal of the homeodomain structure. This gene is expressed primarily in the cortex of the root and the stem. protein_coding HOMEOBOX 3 (HB-3) HOMEOBOX 3 (ATHB-3);HOMEOBOX 3 (HB-3); (ATHB3);HOMEOBOX FROM ARABIDOPSIS THALIANA 7 (HAT7)		-2.40842	8.09e-06		-0.730519	0.0256205		-0.814345	0.0424627		1.31776		DOWN	DOWN	DOWN	GOLD		-	-	not reported	-
AT2G43290	Calmodulin-like MSS3.Encodes an endomembrane localized member of the CML subfamily VII. Contains a canonical CaM domain and unique N-terminal extension that distinguishes it from other members of the subfamily. protein_coding MULTICOPY SUPPRESSORS OF SNF4 DEFICIENCY IN YEAST 3 (MSS3) (ATCML5);MULTICOPY SUPPRESSORS OF SNF4 DEFICIENCY IN YEAST 3 (MSS3)		-1.66702	2.09e-05		-0.822789	0.00355659		-1.2949	0.000815783		1.26157		DOWN	DOWN	DOWN	GOLD		-	-	not reported	-
AT3G49190	O-acyltransferase (WSD1-like) family protein;(source:Araport11) protein_coding		-1.8518	0.000182516		-0.80642	0.0335448		-1.06526	0.0242239		1.24116		DOWN	DOWN	DOWN	GOLD		-	-	not reported	-
AT3G58620	Encodes one of the 36 carboxylate clamp (CC)-tetratricopeptide repeat (TPR) proteins (Prasad 2010, Pubmed ID: 20856808) with potential to interact with Hsp90/Hsp70 as co-chaperones. The TTL family is required for osmotic stress tolerance and male sporogenesis. protein_coding TETRATRICOPETIDE-REPEAT THIOREDOXIN-LIKE 4 (TTL4) TETRATRICOPETIDE-REPEAT THIOREDOXIN-LIKE 4 (TTL4)		-1.51193	0.000159242		-1.30898	0.000838442		-0.873363	0.0209277		1.23142		DOWN	DOWN	DOWN	GOLD		-	-	not reported	-
AT5G54380	Encodes THESEUS1 (THE1), a receptor kinase regulated by Brassinosteroids and required for cell elongation during vegetative growth. protein_coding THESEUS1 (THE1) THESEUS1 (THE1)		-1.66378	7.44e-05		-0.902385	0.0058333		-1.1208	0.00535187		1.22899		DOWN	DOWN	DOWN	GOLD		-	-	not reported	-
AT5G16590	Leucine-rich repeat protein kinase family protein;(source:Araport11) protein_coding (LRR1) (LRR1);LEUCINE RICH REPEAT PROTEIN 1 (LRR1)		-1.74395	3.26e-05		-0.827114	0.00660903		-1.07986	0.00467576		1.21698		DOWN	DOWN	DOWN	GOLD		-	-	not reported	-
AT1G70370	polygalacturonase 2;(source:Araport11) protein_coding POLYGALACTURONASE 2 (PG2) POLYGALACTURONASE 2 (PG2)		-1.05814	8.51e-05		-1.00361	0.000301574		-1.44313	6.38e-05		1.16829		DOWN	DOWN	DOWN	GOLD		-	-	not reported	-
AT1G72230	Cupredoxin superfamily protein;(source:Araport11) protein_coding		-1.13618	0.00192719		-1.17132	0.00232641		-1.19178	0.0063683		1.16643		DOWN	DOWN	DOWN	GOLD		-	-	not reported	-
AT4G12730	AF333971 Arabidopsis thaliana fasciclin-like arabinogalactan-protein 2 (Fla2) mRNA, complete cds protein_coding FASCICLIN-LIKE ARABINOGALACTAN 2 (FLA2) FASCICLIN-LIKE ARABINOGALACTAN 2 (FLA2)		-2.01101	5.8e-06		-0.536822	0.0387025		-0.930669	0.0065502		1.1595		DOWN	DOWN	DOWN	GOLD		-	YES	no	-
AT2G16580	SAUR-like auxin-responsive protein family;(source:Araport11) protein_coding SMALL AUXIN UPREGULATED RNA 8 (SAUR8) SMALL AUXIN UPREGULATED RNA 8 (SAUR8)		-1.40779	0.00167846		-0.791451	0.0476042		-1.23911	0.0147699		1.14612		DOWN	DOWN	DOWN	GOLD		-	-	not reported	-
AT1G14290	Encodes one of the two redundant sphingoid base hydroxylases (SBH). Involved in sphingolipid trihydroxy long-chain base (4-hydroxysphinganine) biosynthesis. Double mutants of SBHs were dwarfed and not able to progress from vegetative to reproductive growth. protein_coding SPHINGOID BASE HYDROXYLASE 2 (SBH2) SPHINGOID BASE HYDROXYLASE 2 (SBH2); (ATSBH2)		-1.62289	4.09e-05		-0.658097	0.0173081		-1.13732	0.00265257		1.13943		DOWN	DOWN	DOWN	GOLD		-	-	not reported	-
AT2G28410	transmembrane protein;(source:Araport11) protein_coding		-1.25533	0.000231686		-0.867549	0.00336708		-1.14231	0.00224049		1.0884		DOWN	DOWN	DOWN	GOLD		-	-	not reported	-
AT5G01220	Encodes a UDP-sulfoquinovose:DAG sulfoquinovosyltransferase that is involved in sulfolipid biosynthesis and whose expression is responsive to both phosphate (Pi) and phosphite (Phi) in both roots and shoots. protein_coding SULFOQUINOVOSYLDIACYLGLYCEROL 2 (SQD2) SULFOQUINOVOSYLDIACYLGLYCEROL 2 (SQD2)		-1.35203	0.000978184		-0.797259	0.0258597		-1.10819	0.0141508		1.08583		DOWN	DOWN	DOWN	GOLD		-	-	not reported	-
AT1G08500	early nodulin-like protein 18;(source:Araport11) protein_coding EARLY NODULIN-LIKE PROTEIN 18 (ENODL18) (AtENODL18);EARLY NODULIN-LIKE PROTEIN 18 (ENODL18)		-1.18176	0.000175684		-1.32366	0.000236922		-0.624681	0.0364095		1.04337		DOWN	DOWN	DOWN	GOLD		YES	YES	no	-
AT1G78070	Transducin/WD40 repeat-like superfamily protein;(source:Araport11) protein_coding		-1.24777	0.000275917		-0.803992	0.00615091		-0.957203	0.00703634		1.00299		DOWN	DOWN	DOWN	GOLD		-	-	not reported	-
AT1G30690	Sec14p-like phosphatidylinositol transfer family protein;(source:Araport11) protein_coding (PATL4) (PATL4)		-1.25673	0.000324988		-0.676461	0.0175951		-1.00752	0.00626378		0.980237		DOWN	DOWN	DOWN	GOLD		-	-	not reported	-
AT4G12330	member of CYP706A protein_coding "CYTOCHROME P450, FAMILY 706, SUBFAMILY A, POLYPEPTIDE 7" (CYP706A7) "CYTOCHROME P450, FAMILY 706, SUBFAMILY A, POLYPEPTIDE 7" (CYP706A7)		-0.871441	0.000873907		-1.20392	0.000268476		-0.83116	0.00549401		0.96884		DOWN	DOWN	DOWN	GOLD		-	-	not reported	-
AT2G34070	Encodes a member of the TBL (TRICHOME BIREFRINGENCE-LIKE) gene family containing a plant-specific DUF231 (domain of unknown function) domain. TBL gene family has 46 members, two of which (TBR/AT5G06700 and TBL3/AT5G01360) have been shown to be involved in the synthesis and deposition of secondary wall cellulose, presumably by influencing the esterification state of pectic polymers. A nomenclature…		-1.00939	0.00116657		-0.575669	0.0344833		-1.192	0.00206489		0.925685		DOWN	DOWN	DOWN	GOLD		-	-	not reported	-
AT4G11820	Encodes a protein with hydroxymethylglutaryl-CoA synthase activity which was characterized by phenotypical complementation of the S. cerevisiae mutant. protein_coding HYDROXYMETHYLGLUTARYL-COA SYNTHASE (HMGS) FLAKY POLLEN 1 (FKP1); (MVA1);HYDROXYMETHYLGLUTARYL-COA SYNTHASE (HMGS)		-1.27448	0.000357733		-0.584098	0.0415802		-0.915992	0.0128534		0.924857		DOWN	DOWN	DOWN	GOLD		-	-	not reported	-
AT3G16570	Encodes RALF23, a member of a diversely expressed predicted peptide family showing sequence similarity to tobacco Rapid Alkalinization Factor (RALF), and is believed to play an essential role in the physiology of Arabidopsis. Consists of a single exon and is characterized by a conserved C-terminal motif and N-terminal signal peptide. RALF23 is significantly downregulated by brassinolide treatment…		-1.0692	0.000981325		-0.955151	0.0028101		-0.742512	0.0334581		0.922288		DOWN	DOWN	DOWN	GOLD		-	-	not reported	-
AT5G44670	glycosyltransferase family protein (DUF23);(source:Araport11) protein_coding GALACTAN SYNTHASE 2 (GALS2) GALACTAN SYNTHASE 2 (GALS2)		-1.44852	1.08e-05		-0.689476	0.00281546		-0.62819	0.014563		0.922061		DOWN	DOWN	DOWN	GOLD		-	-	not reported	-
AT3G55950	CRINKLY4 related 3;(source:Araport11) protein_coding CRINKLY4 RELATED 3 (CCR3) (ATCRR3);CRINKLY4 RELATED 3 (CCR3)		-1.22343	7.5e-05		-0.504014	0.0249117		-0.790187	0.00670006		0.839211		DOWN	DOWN	DOWN	GOLD		YES	-	not reported	-
AT2G47500	P-loop nucleoside triphosphate hydrolases superfamily protein with CH (Calponin Homology) domain-containing protein;(source:Araport11) protein_coding		-1.04117	0.000872911		-0.53194	0.0466126		-0.94416	0.00718455		0.839089		DOWN	DOWN	DOWN	GOLD		-	-	not reported	-
AT2G26730	Leucine-rich repeat protein kinase family protein;(source:Araport11) protein_coding		-0.948545	0.00022585		-0.666892	0.00299783		-0.859843	0.00224049		0.825094		DOWN	DOWN	DOWN	GOLD		-	-	not reported	-
AT2G48030	DNAse I-like superfamily protein;(source:Araport11) protein_coding		-1.04565	0.000115789		-0.688094	0.00268158		-0.700765	0.00755601		0.811503		DOWN	DOWN	DOWN	GOLD		-	-	not reported	-
AT1G22740	GTP-binding protein Rab7 protein_coding RAB GTPASE HOMOLOG G3B (RABG3B) (RAB7);RAB GTPASE HOMOLOG G3B (RABG3B); (RAB75); (ATRABG3B)		-0.78126	0.00879035		-0.731797	0.0154449		-0.852185	0.0205536		0.788414		DOWN	DOWN	DOWN	GOLD		-	-	not reported	-
AT4G02810	A member of the FAF family proteins encoded by the FANTASTIC FOUR (FAF) genes: AT4G02810 (FAF1), AT1G03170 (FAF2), AT5G19260 (FAF3) and AT3G06020 (FAF4). FAFs have the potential to regulate shoot meristem size in Arabidopsis thaliana. FAFs can repress WUS, which ultimately leads to an arrest of meristem activity in FAF overexpressing lines. protein_coding FANTASTIC FOUR 1 (FAF1) FANTASTIC FOUR 1 …		-0.591174	0.00883342		-0.745616	0.00299783		-1.02317	0.00151016		0.786652		DOWN	DOWN	DOWN	GOLD		-	-	not reported	-
AT1G55210	Disease resistance-responsive (dirigent-like protein) family protein;(source:Araport11) protein_coding		-0.828119	0.00368501		-0.671713	0.014825		-0.758913	0.0233585		0.752915		DOWN	DOWN	DOWN	GOLD		-	-	not reported	-
AT3G57070	Glutaredoxin family protein;(source:Araport11) protein_coding		-0.784953	0.000967865		-0.765472	0.00175859		-0.686008	0.00975068		0.745478		DOWN	DOWN	DOWN	GOLD		-	-	not reported	-
AT1G62430	Encodes a CDP-diacylglycerol synthase, involved in phospholipid biosynthesis. protein_coding CDP-DIACYLGLYCEROL SYNTHASE 1 (CDS1) CDP-DIACYLGLYCEROL SYNTHASE 1 (CDS1);CDP-DIACYLGLYCEROL SYNTHASE 1 (ATCDS1)		-0.84168	0.00089874		-0.581202	0.0106549		-0.697752	0.0125371		0.706878		DOWN	DOWN	DOWN	GOLD		-	-	not reported	-
AT5G22850	Eukaryotic aspartyl protease family protein;(source:Araport11) protein_coding		-0.555702	0.0425965		-0.617603	0.0326813		-0.86235	0.0171167		0.678552		DOWN	DOWN	DOWN	GOLD		-	-	not reported	-
AT1G52880	Transcription factor with a NAC domain. Homologous to the petunia gene NAM which is required for the development of the shoot. Expressed in the embryo. protein_coding NO APICAL MERISTEM (NAM) (ATNAM);ARABIDOPSIS NAC DOMAIN CONTAINING PROTEIN 18 (anac018);NO APICAL MERISTEM (NAM);NAC-REGULATED SEED MORPHOLOGY 2 (NARS2)		-0.555516	0.028817		-0.626959	0.0196985		-0.682898	0.0373615		0.621791		DOWN	DOWN	DOWN	GOLD		YES	-	not reported	-
AT4G30400	RING/U-box superfamily protein;(source:Araport11) protein_coding		-0.659229	0.0116727		-0.565401	0.0317865		-0.637406	0.0494427		0.620679		DOWN	DOWN	DOWN	GOLD		-	YES	no	-
AT3G03660	Encodes a WUSCHEL-related homeobox gene family member with 65 amino acids in its homeodomain. Proteins in this family contain a sequence of eight residues (TLPLFPMH) downstream of the homeodomain called the WUS box. protein_coding WUSCHEL RELATED HOMEOBOX 11 (WOX11) WUSCHEL RELATED HOMEOBOX 11 (WOX11)		4.98762	3.37e-08		0.716764	0.0144093		0.132982	0.999977		1.94579		UP	UP	-	-		YES	YES	YES	-
AT1G21320	nucleic acid/nucleotide binding protein;(source:Araport11) protein_coding		4.19401	6.69e-07		1.50384	0.00175859		-0.00838121	0.999977		1.89649		UP	UP	-	-		-	-	not reported	-
AT2G40330	Encodes a member of the PYR (pyrabactin resistance )/PYL(PYR1-like)/RCAR (regulatory components of ABA receptor) family proteins with 14 members. PYR/PYL/RCAR family proteins function as abscisic acid sensors. Mediate ABA-dependent regulation of protein phosphatase 2Cs ABI1 and ABI2. protein_coding PYR1-LIKE 6 (PYL6) REGULATORY COMPONENTS OF ABA RECEPTOR 9 (RCAR9);PYR1-LIKE 6 (PYL6)		1.36522	0.00835913		2.656	0.000278838		1.22744	0.0517384		1.74955		UP	UP	-	-		-	-	not reported	-
AT4G21870	HSP20-like chaperones superfamily protein;(source:Araport11) protein_coding		1.56951	0.00806619		3.09106	0.000268476		0.345737	0.999977		1.66877		UP	UP	-	-		-	-	not reported	-
AT1G05700	Leucine-rich repeat transmembrane protein kinase protein;(source:Araport11) protein_coding		1.22118	0.0352578		2.47957	0.00108469		0.625508	0.610179		1.44209		UP	UP	-	-		-	-	not reported	-
AT2G48090	hypothetical protein;(source:Araport11) protein_coding		2.42643	0.000423896		1.63747	0.00663451		-0.0115599	0.999977		1.35078		UP	UP	-	-		-	-	not reported	-
AT5G05440	Encodes a member of the PYR (pyrabactin resistance )/PYL(PYR1-like)/RCAR (regulatory components of ABA receptor) family proteins with 14 members. PYR/PYL/RCAR family proteins function as abscisic acid sensors. Mediate ABA-dependent regulation of protein phosphatase 2Cs ABI1 and ABI2. protein_coding PYRABACTIN RESISTANCE 1-LIKE 5 (PYL5) PYRABACTIN RESISTANCE 1-LIKE 5 (PYL5); (ATPYL5);REGULATORY CO…		1.14079	0.000417258		2.37427	1.04e-05		0.504934	0.133243		1.34		UP	UP	-	-		-	YES	YES	-
AT5G45090	phloem protein 2-A7;(source:Araport11) protein_coding PHLOEM PROTEIN 2-A7 (PP2-A7) PHLOEM PROTEIN 2-A7 (PP2-A7);PHLOEM PROTEIN 2-A7 (AtPP2-A7)		1.66912	0.0062718		1.36996	0.0232297		0.924642	0.265654		1.32124		UP	UP	-	-		-	-	not reported	-
AT5G06570	alpha/beta-Hydrolases superfamily protein;(source:Araport11) protein_coding		1.50936	0.0116727		1.75835	0.00659296		0.674675	0.53286		1.31413		UP	UP	-	-		-	YES	YES	-
AT4G21410	Encodes a cysteine-rich receptor-like protein kinase. protein_coding CYSTEINE-RICH RLK (RECEPTOR-LIKE PROTEIN KINASE) 29 (CRK29) CYSTEINE-RICH RLK (RECEPTOR-LIKE PROTEIN KINASE) 29 (CRK29)		1.21287	0.00790833		2.20498	0.000394115		0.373881	0.80508		1.26391		UP	UP	-	-		-	YES	YES	-
AT1G19380	sugar, putative (DUF1195);(source:Araport11) protein_coding		1.45023	0.00644782		1.02627	0.0471117		1.22009	0.0563978		1.2322		UP	UP	-	-		-	-	not reported	-
AT5G55490	Encodes a transmembrane domain containing protein that is expressed in pollen germ cells. protein_coding GAMETE EXPRESSED PROTEIN 1 (GEX1) GAMETE EXPRESSED PROTEIN 1 (GEX1);GAMETE EXPRESSED PROTEIN 1 (ATGEX1)		3.06855	8.83e-08		0.567578	0.0131009		0.00226801	0.999977		1.2128		UP	UP	-	-		-	-	not reported	-
AT2G47160	Boron transporter. Protein accumulates in shoots and roots under conditions of boron deficiency and is degraded within several hours of restoring boron supply. Localized to the plasma membrane under B limitation, and to the cytoplasm after B application before degradation. Protein is transferred via the endosomes to the vacuole for degradation. Localized to the inner plasma membrane domain in the…		1.28989	0.0023474		1.73285	0.000681216		0.613919	0.253091		1.21222		UP	UP	-	-		-	YES	YES	-
AT1G11330	S-locus lectin protein kinase family protein;(source:Araport11) protein_coding RESISTANT TO DFPM INHIBITION OF ABA SIGNALING 2 (RDA2) S DOMAIN1 13 (SD1-13);RESISTANT TO DFPM INHIBITION OF ABA SIGNALING 2 (RDA2)		1.98232	4.09e-05		1.51927	0.000573607		0.00334928	0.999977		1.16831		UP	UP	-	-		-	YES	not detected	-
AT2G04795	hypothetical protein;(source:Araport11) protein_coding		1.26687	0.00103605		1.32267	0.00125983		0.634684	0.13949		1.07474		UP	UP	-	-		-	YES	YES	-
AT1G11920	Pectin lyase-like superfamily protein;(source:Araport11) protein_coding		1.70416	0.000255604		1.35429	0.00181149		0.124583	0.999977		1.06101		UP	UP	-	-		-	-	not reported	-
AT3G23880	F-box and associated interaction domains-containing protein;(source:Araport11) protein_coding		1.03283	0.0370756		1.19049	0.0237697		0.906377	0.185933		1.04323		UP	UP	-	-		-	YES	YES	-
AT5G20640	LURP-one-like protein (DUF567);(source:Araport11) protein_coding		1.76803	8.06e-05		1.35015	0.000978508		-0.00628207	0.999977		1.0373		UP	UP	-	-		-	-	not reported	-
AT1G19050	Encodes a member of the Arabidopsis response regulator (ARR) family, most closely related to ARR15. A two-component response regulator protein containing a phosphate accepting domain in the receiver domain but lacking a DNA binding domain in the output domain. Involved in response to cytokinin and meristem stem cell maintenance. Arr7 protein is stabilized by cytokinin. protein_coding RESPONSE REG…		2.33392	7.5e-05		0.880143	0.0372232		-0.204935	0.999977		1.00304		UP	UP	-	-		-	-	not reported	-
AT4G03510	RMA1 encodes a novel 28 kDa protein with a RING finger motif and a C-terminal membrane-anchoring domain that is involved in the secretory pathway. Has E3 ubiquitin ligase activity. protein_coding RING MEMBRANE-ANCHOR 1 (RMA1) (ATRMA1);RING MEMBRANE-ANCHOR 1 (RMA1)		1.07534	0.00775218		1.21759	0.00493046		0.697132	0.182971		0.996686		UP	UP	-	-		YES	YES	YES	-
AT1G12010	Encodes a protein that appears to have 1-amino-cyclopropane-1-carboxylic acid oxidase activity based on mutant analyses. The mRNA is cell-to-cell mobile. protein_coding 1-AMINO-CYCLOPROPANE-1-CARBOXYLIC ACID OXIDASE 3 (ACO3) 1-AMINO-CYCLOPROPANE-1-CARBOXYLIC ACID OXIDASE 3 (ACO3)		0.937408	0.0245437		1.56181	0.0020422		0.472257	0.554259		0.990492		UP	UP	-	-		-	-	not reported	-
AT1G29090	Cysteine proteinases superfamily protein;(source:Araport11) protein_coding		2.14005	1.53e-06		0.720583	0.00439423		0.0141251	0.999977		0.958254		UP	UP	-	-		-	-	not reported	-
AT4G08770	Encodes a putative apoplastic peroxidase Prx37. Primarily expressed in the vascular bundles. Overexpression renders a dwarf phenotype with smaller plants and delayed development. Plants overexpressing Prx37 also shows an increase in the amount of esterified phenolic material associated with their walls. protein_coding PEROXIDASE 37 (Prx37) PEROXIDASE 37 (Prx37)		1.17688	0.00477806		1.9117	0.000455142		-0.221711	0.999977		0.955622		UP	UP	-	-		-	-	not reported	-
AT1G13110	member of CYP71B The mRNA is cell-to-cell mobile. protein_coding "CYTOCHROME P450, FAMILY 71 SUBFAMILY B, POLYPEPTIDE 7" (CYP71B7) "CYTOCHROME P450, FAMILY 71 SUBFAMILY B, POLYPEPTIDE 7" (CYP71B7)		0.923825	0.0021508		2.16463	1.84e-05		-0.230726	0.793932		0.952578		UP	UP	-	-		-	-	not reported	-
AT4G01700	Chitinase family protein;(source:Araport11) protein_coding		0.735652	0.0309146		1.25524	0.00232641		0.854844	0.0514648		0.94858		UP	UP	-	-		-	-	not reported	-
AT1G15670	Encodes a member of a family of F-box proteins, called the KISS ME DEADLY (KMD) family, that targets type-B ARR proteins for degradation and is involved in the negative regulation of the cytokinin response. Also named as KFB1, a member of a group of Kelch repeat F-box proteins that negatively regulate phenylpropanoid biosynthesis by targeting the phenypropanoid biosynthesis enzyme phenylalanine a…		1.01052	0.00263683		1.40925	0.000618663		0.39746	0.417882		0.939077		UP	UP	-	-		-	YES	no	-
AT3G47510	transmembrane protein;(source:Araport11) protein_coding		1.3904	0.00126527		0.793661	0.0365031		0.595703	0.259032		0.926587		UP	UP	-	-		-	YES	YES	-
AT3G01290	SPFH/Band 7/PHB domain-containing membrane-associated protein family;(source:Araport11) protein_coding HYPERSENSITIVE INDUCED REACTION 2 (HIR2) (AtHIR2);HYPERSENSITIVE INDUCED REACTION 2 (HIR2)		1.02649	0.00191679		0.964732	0.00366036		0.716518	0.052291		0.902579		UP	UP	-	-		-	YES	YES	-
AT3G02790	zinc finger (C2H2 type) family protein;(source:Araport11) protein_coding METHYLENE BLUE SENSITIVITY 1 (MBS1) METHYLENE BLUE SENSITIVITY 1 (MBS1)		1.32642	0.000726261		0.656871	0.0472381		0.614055	0.151887		0.865781		UP	UP	-	-		YES	-	not reported	-
AT4G02380	Encodes AtLEA5 (late embryogenesis abundant like protein). Also known as SENESCENCE-ASSOCIATED GENE 21 (SAG21). Has a role on oxidative stress tolerance. mRNA levels are elevated in response to various stresses. protein_coding SENESCENCE-ASSOCIATED GENE 21 (SAG21) SENESCENCE-ASSOCIATED GENE 21 (SAG21);LATE EMBRYOGENESIS ABUNDANT 38 (LEA38);ARABIDOPSIS THALIANA LATE EMBRYOGENENSIS ABUNDANT LIKE 5 …		1.42757	0.0049198		0.952753	0.049043		0.193694	0.999977		0.858004		UP	UP	-	-		-	YES	no	-
AT5G06630	proline-rich extensin-like family protein;(source:Araport11) protein_coding		1.03595	0.0146273		0.914593	0.0333291		0.589982	0.359308		0.846843		UP	UP	-	-		-	-	not reported	-
AT5G43690	P-loop containing nucleoside triphosphate hydrolases superfamily protein;(source:Araport11) protein_coding		1.0095	0.00351102		0.777863	0.0187199		0.69918	0.0840635		0.828848		UP	UP	-	-		-	-	not reported	-
AT1G65390	Phloem Protein2 family gene encoding a two-domain protein containing predicted lectin and Toll/Interleukin-1 receptor domains, which is induced upon spider mite attack and improves the ability to defend against T. urticae by participating in the tight regulation of hormonal cross talk upon mite feeding. protein_coding PHLOEM PROTEIN 2 A5 (PP2-A5) PHLOEM PROTEIN 2 A5 (PP2-A5);PHLOEM PROTEIN 2 A5 (…		1.5	0.00324313		0.986264	0.0376227		-0.0127336	0.999977		0.82451		UP	UP	-	-		-	-	not reported	-
AT5G07580	encodes a member of the ERF (ethylene response factor) subfamily B-3 of ERF/AP2 transcription factor family. The protein contains one AP2 domain. There are 18 members in this subfamily including ATERF-1, ATERF-2, AND ATERF-5. protein_coding (ERF106) DECREASE WAX BIOSYNTHESIS2 (DEWAX2); (ERF106)		1.18831	0.023594		1.2445	0.0234734		-0.0053801	0.999977		0.809142		UP	UP	-	-		-	-	not reported	TF
AT2G31110	Encodes a member of the TBL (TRICHOME BIREFRINGENCE-LIKE) gene family containing a plant-specific DUF231 (domain of unknown function) domain. TBL gene family has 46 members, two of which (TBR/AT5G06700 and TBL3/AT5G01360) have been shown to be involved in the synthesis and deposition of secondary wall cellulose, presumably by influencing the esterification state of pectic polymers. A nomenclature…		0.831772	0.00987347		0.823025	0.0131752		0.768929	0.0522105		0.807909		UP	UP	-	-		-	-	not reported	-
AT4G18250	receptor Serine/Threonine kinase-like protein;(source:Araport11) protein_coding		1.38733	0.00250653		1.06293	0.0144365		-0.0508095	0.999977		0.799816		UP	UP	-	-		-	-	not reported	-
AT1G14890	Plant invertase/pectin methylesterase inhibitor superfamily protein;(source:Araport11) protein_coding		0.760039	0.0406331		0.832484	0.0331212		0.774723	0.115935		0.789082		UP	UP	-	-		-	-	not reported	-
AT1G71695	Peroxidase superfamily protein;(source:Araport11) protein_coding		0.988993	0.0216443		0.881994	0.0458304		0.480849	0.562892		0.783945		UP	UP	-	-		-	-	not reported	-
AT1G02900	Member of a diversely expressed predicted peptide family showing sequence similarity to tobacco Rapid Alkalinization Factor (RALF), and is believed to play an essential role in the physiology of Arabidopsis. Consists of a single exon and is characterized by a conserved C-terminal motif and N-terminal signal peptide. Mediates Ca2+-dependent signaling. protein_coding RAPID ALKALINIZATION FACTOR 1 (…		0.938866	0.00524314		0.648388	0.0445572		0.714938	0.0755191		0.767397		UP	UP	-	-		YES	-	not reported	-
AT3G62150	Encodes a facultative transporter controlling auxin concentrations in plant cells. protein_coding ATP-BINDING CASSETTE B21 (ABCB21) P-GLYCOPROTEIN 21 (PGP21);ATP-BINDING CASSETTE B21 (ABCB21)		1.17329	0.00128583		0.87638	0.00913323		0.206236	0.995334		0.75197		UP	UP	-	-		-	-	not reported	-
AT2G36690	Protein belonging to the Fe-dependent 2-oxoglutarate dioxygenase superfamily, catalyzes the stereospecific hydration of GA12 to produce DHGA12, negatively regulates ABA sensitivity during germination, phototrophic establishment and seedling development. protein_coding GERMINATION INSENSITIVE TO ABA MUTANT 2 (GIM2) GAIN-OF-FUNCTION IN ABA-MODULATED SEED GERMINATION 2 (GAS2);GERMINATION INSENSITIVE…		0.936889	0.000816572		1.04939	0.000736084		0.194164	0.823656		0.726815		UP	UP	-	-		-	YES	no	-
AT5G60760	P-loop containing nucleoside triphosphate hydrolases superfamily protein;(source:Araport11) protein_coding		1.18256	0.00695549		1.49531	0.00242509		-0.499647	0.503035		0.726076		UP	UP	-	-		-	-	not reported	-
AT5G25440	Receptor like kinase involved in HopZ1a effector triggered immunity. Interacts with ZAR1. Localization to membrane is dependent on N-terminal myristoylation domain. protein_coding SUPPRESSOR OF ZED1-D1 (SZE1) SUPPRESSOR OF ZED1-D1 (SZE1)		0.91168	0.00160898		0.756846	0.00659296		0.469966	0.160392		0.712831		UP	UP	-	-		-	-	not reported	-
AT3G14680	putative cytochrome P450 protein_coding "CYTOCHROME P450, FAMILY 72, SUBFAMILY A, POLYPEPTIDE 14" (CYP72A14) "CYTOCHROME P450, FAMILY 72, SUBFAMILY A, POLYPEPTIDE 14" (CYP72A14)		0.842244	0.0019151		0.868816	0.00231765		0.414201	0.206866		0.70842		UP	UP	-	-		-	YES	no	-
AT2G23810	Member of TETRASPANIN family protein_coding TETRASPANIN8 (TET8) TETRASPANIN8 (TET8)		1.13369	0.00121036		0.848729	0.0086713		0.119343	0.999977		0.700587		UP	UP	-	-		-	-	not reported	-
AT2G16740	ubiquitin-conjugating enzyme 29;(source:Araport11) protein_coding UBIQUITIN-CONJUGATING ENZYME 29 (UBC29) UBIQUITIN-CONJUGATING ENZYME 29 (UBC29)		1.01721	0.000617394		0.514685	0.0381914		0.555882	0.0713655		0.695927		UP	UP	-	-		YES	YES	YES	-
AT5G10520	ROP binding protein kinases 1;(source:Araport11) protein_coding ROP BINDING PROTEIN KINASES 1 (RBK1) ROP BINDING PROTEIN KINASES 1 (RBK1)		1.04503	0.0232829		0.959824	0.042864		0.0688697	0.999977		0.69124		UP	UP	-	-		-	-	not reported	-
AT4G33020	member of Fe(II) transporter isolog family protein_coding (ZIP9) (ATZIP9); (ZIP9)		0.731974	0.0269683		0.847184	0.0160094		0.466506	0.367719		0.681888		UP	UP	-	-		-	-	not reported	-
AT5G54160	A caffeic acid/5-hydroxyferulic acid O-methyltransferase. Interacts with 14-4-3 proteins in yeast 2 hybrid assay. AtOMT1 (At5g54160) encodes a flavonol 3?-O-methyltransferase that is highly active towards quercetin and myricetin. The substrate specificity identifies the enzyme as flavonol 3?-methyltransferase which replaces the former annotation of the gene to encode a caffeic acid/5-hydroxyferul…		0.728164	0.0197689		0.779116	0.017236		0.536195	0.212316		0.681158		UP	UP	-	-		YES	YES	no	-
AT3G49360	Encodes a cytosolic 6-phosphogluconolactonase (PGL) thought to be involved in the oxidative pentose-phosphate pathway (OPPP). protein_coding 6-PHOSPHOGLUCONOLACTONASE 2 (PGL2) 6-PHOSPHOGLUCONOLACTONASE 2 (PGL2)		0.969475	0.000933456		0.506945	0.0441859		0.536017	0.0888746		0.670812		UP	UP	-	-		-	YES	YES	-
AT5G54500	Encodes a flavin mononucleotide-binding flavodoxin-like quinone reductase that is a primary auxin-response gene. protein_coding FLAVODOXIN-LIKE QUINONE REDUCTASE 1 (FQR1) FLAVODOXIN-LIKE QUINONE REDUCTASE 1 (FQR1)		0.89127	0.000406184		0.614769	0.00579767		0.486335	0.0542677		0.664125		UP	UP	-	-		-	-	not reported	-
AT1G59730	thioredoxin H-type 7;(source:Araport11) protein_coding THIOREDOXIN H-TYPE 7 (TH7) THIOREDOXIN H-TYPE 7 (TH7);THIOREDOXIN H-TYPE 7 (ATH7)		0.723651	0.0155956		0.80882	0.0107024		0.433456	0.330684		0.655309		UP	UP	-	-		-	-	not reported	-
AT1G64370	filaggrin-like protein;(source:Araport11) protein_coding		0.954007	0.0272251		0.969651	0.0313887		0.0169788	0.999977		0.646879		UP	UP	-	-		-	-	not reported	-
AT1G76080	Encodes a thioredoxin localized in chloroplast stroma. Known as CDSP32 (CHLOROPLASTIC DROUGHT-INDUCED STRESS PROTEIN OF 32 KD). protein_coding CHLOROPLASTIC DROUGHT-INDUCED STRESS PROTEIN OF 32 KD (CDSP32) ARABIDOPSIS THALIANA CHLOROPLASTIC DROUGHT-INDUCED STRESS PROTEIN OF 32 KD (ATCDSP32);CHLOROPLASTIC DROUGHT-INDUCED STRESS PROTEIN OF 32 KD (CDSP32)		1.15365	0.00218244		0.785431	0.0240629		-0.00408943	0.999977		0.644998		UP	UP	-	-		-	-	not reported	-
AT1G75820	Putative receptor kinase with an extracellular leucine-rich domain. Controls shoot and floral meristem size, and contributes to establish and maintain floral meristem identity. Negatively regulated by KAPP (kinase-associated protein phosphatase). CLV3 peptide binds directly CLV1 ectodomain. protein_coding CLAVATA 1 (CLV1) CLAVATA 1 (CLV1); (ATCLV1);FLOWER DEVELOPMENT 5 (FLO5);FASCIATA 3 (FAS3)		1.03836	0.00577435		0.772579	0.0340122		0.0794923	0.999977		0.630145		UP	UP	-	-		-	-	not reported	-
AT1G52700	alpha/beta-Hydrolases superfamily protein;(source:Araport11) protein_coding		0.951444	0.020671		0.845025	0.0445848		0.0884339	0.999977		0.628301		UP	UP	-	-		-	-	not reported	-
AT2G41510	It encodes a protein whose sequence is similar to cytokinin oxidase/dehydrogenase, which catalyzes the degradation of cytokinins. protein_coding CYTOKININ OXIDASE/DEHYDROGENASE 1 (CKX1) CYTOKININ OXIDASE/DEHYDROGENASE 1 (ATCKX1);CYTOKININ OXIDASE/DEHYDROGENASE 1 (CKX1)		1.10977	4.2e-05		0.743631	0.00120169		-0.01403	0.999977		0.613124		UP	UP	-	-		-	-	not reported	-
AT5G43910	pfkB-like carbohydrate kinase family protein;(source:Araport11) protein_coding		0.71295	0.00218483		0.979383	0.000573607		0.130044	0.999977		0.607459		UP	UP	-	-		-	-	not reported	-
AT3G04420	NAC domain containing protein 48;(source:Araport11) protein_coding NAC DOMAIN CONTAINING PROTEIN 48 (NAC048) NAC DOMAIN CONTAINING PROTEIN 48 (NAC048);NAC DOMAIN CONTAINING PROTEIN 48 (anac048)		0.825007	0.0343478		0.96485	0.0200418		0.0107081	0.999977		0.600189		UP	UP	-	-		-	-	not reported	-
AT1G49200	RING/U-box superfamily protein;(source:Araport11) protein_coding		0.866434	0.0242295		0.821469	0.0381913		0.100186	0.999977		0.59603		UP	UP	-	-		-	YES	YES	-
AT2G41700	ATP-binding cassette A1;(source:Araport11) protein_coding ATP-BINDING CASSETTE A1 (ABCA1) ARABIDOPSIS THALIANA ATP-BINDING CASSETTE A1 (AtABCA1);ATP-BINDING CASSETTE A1 (ABCA1)		0.742717	0.0167904		0.886464	0.00793727		0.142567	0.999977		0.590583		UP	UP	-	-		-	-	not reported	-
AT5G49660	The gene encodes receptorlike kinase (RLK). Involved in the maintenance organization of cell files or cell morphology in conductive elements. Functions as a receptor for CEP1 peptide. Mediates nitrate uptake signaling. protein_coding XYLEM INTERMIXED WITH PHLOEM 1 (XIP1) C-TERMINALLY ENCODED PEPTIDE RECEPTOR 1 (CEPR1);XYLEM INTERMIXED WITH PHLOEM 1 (XIP1)		0.605444	0.0206496		0.539543	0.044017		0.567186	0.0905491		0.570724		UP	UP	-	-		-	-	not reported	-
AT5G14760	At5g14760 encodes for L-aspartate oxidase involved in the early steps of NAD biosynthesis. In contrary to the EC 1.4.3.16 (l-aspartate oxidase - deaminating) the enzyme catalyzes the reaction L-aspartate + O2 = iminoaspartate (alpha-iminosuccinate) + H2O2 protein_coding L-ASPARTATE OXIDASE (AO) FLAGELLIN-INSENSITIVE 4 (FIN4);L-ASPARTATE OXIDASE (AO)		1.06569	0.0184014		1.01976	0.0281981		-0.40505	0.754451		0.560133		UP	UP	-	-		-	YES	no	-
AT2G21560	nucleolar-like protein;(source:Araport11) protein_coding		0.921543	0.00407191		0.725062	0.019119		0.0214368	0.999977		0.556014		UP	UP	-	-		-	-	not reported	-
AT1G60680	NAD(P)-linked oxidoreductase superfamily protein;(source:Araport11) protein_coding ARF-GAP DOMAIN 2 (AGD2)		0.701758	0.00557308		0.788532	0.00366036		0.160359	0.983368		0.550216		UP	UP	-	-		-	-	not reported	-
AT1G52200	PLAC8 family protein;(source:Araport11) protein_coding		0.599696	0.00644782		1.09768	0.00030342		-0.0513082	0.999977		0.548689		UP	UP	-	-		-	-	not reported	-
AT1G25275	Thionin-like gene involved in resistance against the beet cyst nematode (Heterodera schachtii). protein_coding		0.793418	0.0107054		0.664928	0.0326813		0.187667	0.999977		0.548671		UP	UP	-	-		-	-	not reported	-
AT3G14610	putative cytochrome P450 protein_coding "CYTOCHROME P450, FAMILY 72, SUBFAMILY A, POLYPEPTIDE 7" (CYP72A7) "CYTOCHROME P450, FAMILY 72, SUBFAMILY A, POLYPEPTIDE 7" (CYP72A7)		0.64316	0.0188668		0.563615	0.0439179		0.43063	0.273788		0.545802		UP	UP	-	-		-	-	not reported	-
AT3G63110	Encodes cytokinin synthase involved in cytokinin biosynthesis. IPT3 subcellular localization is modulated by farnesylation- when farnesylated it is localized to the nucleus, otherwise to the chloroplast. protein_coding ISOPENTENYLTRANSFERASE 3 (IPT3) ISOPENTENYLTRANSFERASE 3 (ATIPT3);ISOPENTENYLTRANSFERASE 3 (IPT3)		0.756878	0.0458881		1.31774	0.00324577		-0.444422	0.542486		0.543397		UP	UP	-	-		-	-	not reported	-
AT3G01690	alpha/beta-Hydrolases superfamily protein;(source:Araport11) protein_coding		0.64943	0.0313645		0.807335	0.0131752		0.153723	0.999977		0.536829		UP	UP	-	-		-	-	not reported	-
AT1G33600	Leucine-rich repeat (LRR) family protein;(source:Araport11) protein_coding		1.09735	4.86e-05		0.541285	0.00683207		-0.0382048	0.999977		0.533476		UP	UP	-	-		-	-	not reported	-
AT1G58410	Disease resistance protein (CC-NBS-LRR class) family;(source:Araport11) protein_coding		0.765214	0.0103156		0.623028	0.0362357		0.156087	0.999977		0.514776		UP	UP	-	-		-	-	not reported	-
AT2G17720	Encodes a prolyl 4-hydroxylase that modifies the extensin proteins in root hair cells. protein_coding PROLYL 4-HYDROXYLASE 5 (P4H5) PROLYL 4-HYDROXYLASE 5 (P4H5)		0.595167	0.00444299		0.507324	0.0136452		0.427862	0.0850139		0.510118		UP	UP	-	-		-	-	not reported	-
AT4G11290	Peroxidase superfamily protein;(source:Araport11) protein_coding		0.906859	0.00542639		0.860246	0.0090984		-0.26124	0.807199		0.501955		UP	UP	-	-		-	-	not reported	-
AT4G19520	disease resistance protein (TIR-NBS-LRR class) family;(source:Araport11) protein_coding		0.837115	0.0102095		0.906105	0.00821808		-0.241994	0.89301		0.500409		UP	UP	-	-		-	-	not reported	-
AT5G64000	3'(2'),5'-bisphosphate nucleotidase protein_coding (SAL2) (ATSAL2); (SAL2)		0.866013	0.00147618		0.539372	0.027246		0.03375	0.999977		0.479712		UP	UP	-	-		-	-	not reported	-
AT1G49230	RING/U-box superfamily protein;(source:Araport11) protein_coding ARABIDOPSIS TOXICOS EN LEVADURA 78 (ATL78) (ATATL78);ARABIDOPSIS TOXICOS EN LEVADURA 78 (ATL78)		0.683697	0.0151239		1.19973	0.00096696		-0.574549	0.109781		0.436294		UP	UP	-	-		-	-	not reported	-
AT4G37580	involved in apical hook development. putative N-acetyltransferase protein_coding HOOKLESS 1 (HLS1) HOOKLESS 1 (HLS1);UNUSUAL SUGAR RESPONSE 2 (UNS2);CONSTITUTIVE PHOTOMORPHOGENIC 3 (COP3)		0.65377	0.0388742		0.667613	0.044017		-0.021567	0.999977		0.433272		UP	UP	-	-		-	YES	YES	-
AT2G39660	Encodes a plasma membrane-localized ser/thr protein kinase that is a crucial component of host response signaling required to activate the resistance responses to Botrytis and A. brassicicola infection. It is likely a negative regulator of salicylic acid accumulation and basal defense against virulent bacterial pathogens. protein_coding BOTRYTIS-INDUCED KINASE1 (BIK1) BOTRYTIS-INDUCED KINASE1 (BI…		0.552652	0.0215932		0.601503	0.017236		0.0959706	0.999977		0.416709		UP	UP	-	-		-	-	not reported	-
AT3G63010	Encodes a gibberellin (GA) receptor ortholog of the rice GA receptor gene (OsGID1). Has GA-binding activity, showing higher affinity to GA4. Interacts with DELLA proteins in vivo in the presence of GA4. The mRNA is cell-to-cell mobile. protein_coding GA INSENSITIVE DWARF1B (GID1B) GA INSENSITIVE DWARF1B (GID1B); (ATGID1B)		0.533176	0.028485		0.542688	0.0325892		0.135303	0.999977		0.403722		UP	UP	-	-		-	YES	YES	-
AT2G26440	Plant invertase/pectin methylesterase inhibitor superfamily;(source:Araport11) protein_coding PECTIN METHYLESTERASE 12 (PME12) PECTIN METHYLESTERASE 12 (PME12)		0.692512	0.00872091		0.524915	0.0439179		-0.00815263	0.999977		0.403092		UP	UP	-	-		-	-	not reported	-
AT5G63600	encodes a protein whose sequence is similar to flavonol synthase protein_coding FLAVONOL SYNTHASE 5 (FLS5) (ATFLS5);FLAVONOL SYNTHASE 5 (FLS5)		0.603151	0.0348603		0.62286	0.0372232		-0.08176	0.999977		0.381417		UP	UP	-	-		-	-	not reported	-
AT1G65960	glutamate decarboxylase (GAD2) The mRNA is cell-to-cell mobile. protein_coding GLUTAMATE DECARBOXYLASE 2 (GAD2) GLUTAMATE DECARBOXYLASE 2 (GAD2)		0.570237	0.0164888		0.528929	0.0296693		0.0372336	0.999977		0.3788		UP	UP	-	-		-	-	not reported	-
AT5G53160	Encodes RCAR3, a regulatory component of ABA receptor. Interacts with protein phosphatase 2Cs ABI1 and ABI2. Stimulates ABA signaling. The mRNA is cell-to-cell mobile. protein_coding REGULATORY COMPONENTS OF ABA RECEPTOR 3 (RCAR3) PYR1-LIKE 8 (PYL8);REGULATORY COMPONENTS OF ABA RECEPTOR 3 (RCAR3)		0.578769	0.0120974		0.69323	0.00585586		-0.14912	0.994325		0.374293		UP	UP	-	-		-	-	not reported	-
AT5G42010	Transducin/WD40 repeat-like superfamily protein;(source:Araport11) protein_coding		0.563566	0.0305663		0.601062	0.0280575		-0.0727081	0.999977		0.363974		UP	UP	-	-		-	-	not reported	-
AT1G01340	member of Cyclic nucleotide gated channel family protein_coding CYCLIC NUCLEOTIDE GATED CHANNEL 10 (CNGC10) CYCLIC NUCLEOTIDE GATED CHANNEL 10 (CNGC10)		0.743435	0.0218946		0.975322	0.00662053		-0.649229	0.125807		0.35651		UP	UP	-	-		-	-	not reported	-
AT4G39970	Haloacid dehalogenase-like hydrolase (HAD) superfamily protein;(source:Araport11) protein_coding		0.517061	0.0110822		0.541332	0.0108226		-0.0345388	0.999977		0.341285		UP	UP	-	-		-	-	not reported	-
AT1G59870	ATP binding cassette transporter. Localized to the plasma membrane in uninfected cells. In infected leaves, the protein concentrated at infection sites. Contributes to nonhost resistance to inappropriate pathogens that enter by direct penetration in a salicylic acid?dependent manner. Required for mlo resistance. Has Cd transporter activity (Cd2+ extrusion pump) and contributes to heavy metal resi…		0.595437	0.0371948		0.64173	0.0326813		-0.368396	0.456346		0.28959		UP	UP	-	-		-	-	not reported	-
AT5G66170	Encodes a thiosulfate sulfurtransferase/rhodanese. protein_coding SULFURTRANSFERASE 18 (STR18) SULFURTRANSFERASE 18 (STR18)		1.39222	0.000838351		-0.938426	0.0113058		0.961224	0.0297575		0.471674		UP	DOWN	UP	-		YES	YES	YES	-
AT1G69480	EXS (ERD1/XPR1/SYG1) family protein;(source:Araport11) protein_coding		0.604709	0.033581		-0.652048	0.0294185		0.818842	0.0268021		0.257168		UP	DOWN	UP	-		-	-	not reported	-
AT1G14960	Polyketide cyclase/dehydrase and lipid transport superfamily protein;(source:Araport11) protein_coding		1.08838	0.0025286		-1.90973	0.000162944		-0.71918	0.0817065		0.513509		UP	DOWN	-	-		-	-	not reported	-
AT5G54510	Encodes an IAA-amido synthase that conjugates Ala, Asp, Phe, and Trp to auxin. Lines overexpressing this gene accumulate IAA-ASP and are hypersensitive to several auxins. Identified as a dominant mutation that displays shorter hypocotyls in light grown plants when compared to wild type siblings. Protein is similar to auxin inducible gene from pea (GH3). protein_coding DWARF IN LIGHT 1 (DFL1) DWAR…		0.78683	0.0154925		-1.22143	0.00180084		-0.361382	0.553701		0.265328		UP	DOWN	-	-		YES	-	not reported	-
AT1G08430	Encodes a Al-activated malate efflux transporter. It is essential for aluminum tolerance but does not represent the major Al tolerance QTL. Staurosporine and calyculin A both block all changes in AtALMT1 gene expression (as a result malate release is totally inhibited). AtALMT1 transcription was clearly induced by indole-3-acetic acid, abscisic acid, low pH, hydrogen peroxide and flg22. STOP1 and…		1.50965	0.0371042		-1.62191	0.0330344		-0.677712	0.741364		0.263327		UP	DOWN	-	-		-	-	not reported	-
AT3G22240	cysteine-rich/transmembrane domain PCC1-like protein;(source:Araport11) protein_coding CYSTEINE-RICH TRANSMEMBRANE MODULE 9 (ATHCYSTM9) CYSTEINE-RICH TRANSMEMBRANE MODULE 9 (ATHCYSTM9)		0.892266	0.00398326		-0.598141	0.0409563		-0.147067	0.999977		0.0490194		UP	DOWN	-	-		-	-	not reported	-
AT1G23730	beta carbonic anhydrase 3;(source:Araport11) protein_coding BETA CARBONIC ANHYDRASE 3 (BCA3) BETA CARBONIC ANHYDRASE 3 (BCA3);BETA CARBONIC ANHYDRASE 3 (ATBCA3)		6.88096	1.18e-05		0.931726	0.440172		5.23772	0.000582148		4.35013		UP	-	UP	-		-	YES	YES	-
AT2G29470	Encodes glutathione transferase belonging to the tau class of GSTs. Naming convention according to Wagner et al. (2002). protein_coding GLUTATHIONE S-TRANSFERASE TAU 3 (GSTU3) GLUTATHIONE S-TRANSFERASE TAU 3 (ATGSTU3);GLUTATHIONE S-TRANSFERASE TAU 3 (GSTU3);GLUTATHIONE S-TRANSFERASE 21 (GST21)		6.44197	2.1e-05		0.469638	0.824623		2.68154	0.0277092		3.19772		UP	-	UP	-		-	YES	YES	-
AT3G23240	encodes a member of the ERF (ethylene response factor) subfamily B-3 of ERF/AP2 transcription factor family (ERF1). The protein contains one AP2 domain. There are 18 members in this subfamily including ATERF-1, ATERF-2, AND ATERF-5. EREBP like protein that binds GCC box of ethylene regulated promoters such as basic chitinases. Constitutive expression of ERF1 phenocopies ethylene over production. …		5.16836	4.95e-07		0.650072	0.18646		3.41214	8.01e-05		3.07686		UP	-	UP	-		YES	YES	YES	TF
AT1G28370	encodes a member of the ERF (ethylene response factor) subfamily B-1 of ERF/AP2 transcription factor family. The protein contains one AP2 domain. There are 15 members in this subfamily including ATERF-3, ATERF-4, ATERF-7, and leafy petiole. protein_coding ERF DOMAIN PROTEIN 11 (ERF11) ERF DOMAIN PROTEIN 11 (ATERF11);ERF DOMAIN PROTEIN 11 (ERF11)		4.50709	5.08e-05		1.25613	0.104713		3.30433	0.0023791		3.02252		UP	-	UP	-		-	YES	YES	TF
AT2G22880	VQ motif-containing protein;(source:Araport11) protein_coding (VQ12) (VQ12)		3.63124	0.000775169		1.35191	0.146401		3.34486	0.00604701		2.776		UP	-	UP	-		-	YES	YES	-
AT1G06160	encodes a member of the ERF (ethylene response factor) subfamily B-3 of ERF/AP2 transcription factor family. The protein contains one AP2 domain. There are 18 members in this subfamily including ATERF-1, ATERF-2, AND ATERF-5. protein_coding OCTADECANOID-RESPONSIVE ARABIDOPSIS AP2/ERF 59 (ORA59) ETHYLENE RESPONSIVE FACTOR 59 (ERF59);OCTADECANOID-RESPONSIVE ARABIDOPSIS AP2/ERF 59 (ORA59)		3.41941	0.0002026		1.30902	0.0637178		3.55486	0.000893072		2.7611		UP	-	UP	-		YES	-	not reported	TF
AT4G28850	xyloglucan endotransglucosylase/hydrolase 26;(source:Araport11) protein_coding XYLOGLUCAN ENDOTRANSGLUCOSYLASE/HYDROLASE 26 (XTH26) XYLOGLUCAN ENDOTRANSGLUCOSYLASE/HYDROLASE 26 (XTH26); (ATXTH26)		2.97318	0.00482292		0.948828	0.452472		3.93928	0.00413436		2.62043		UP	-	UP	-		-	-	not reported	-
AT5G47220	Encodes a member of the ERF (ethylene response factor) subfamily B-3 of ERF/AP2 transcription factor family (ATERF-2). The protein contains one AP2 domain. Functions as activator of GCC box?dependent transcription. Positive regulator of JA-responsive defense genes and resistance to F. oxysporum and enhances JA inhibition of root elongation. protein_coding ETHYLENE RESPONSIVE ELEMENT BINDING FACTO…		2.96578	0.00235251		1.17838	0.206196		3.60535	0.00334496		2.58317		UP	-	UP	-		YES	YES	YES	TF
AT5G57540	Encodes a xyloglucan endotransglucosylase/hydrolase with only only the endotransglucosylase (XET; EC 2.4.1.207) activity towards xyloglucan and non-detectable endohydrolytic (XEH; EC 3.2.1.151) activity. protein_coding XYLOGLUCAN ENDOTRANSGLUCOSYLASE/HYDROLASE 13 (XTH13) (AtXTH13);XYLOGLUCAN ENDOTRANSGLUCOSYLASE/HYDROLASE 13 (XTH13)		2.67034	0.029344		1.11498	0.502903		3.5362	0.0259246		2.44051		UP	-	UP	-		-	-	not reported	-
AT2G29460	Encodes glutathione transferase belonging to the tau class of GSTs. Naming convention according to Wagner et al. (2002). Role in the degradation of H2O2 to water using glutathione as electron donor protein_coding GLUTATHIONE S-TRANSFERASE TAU 4 (GSTU4) GLUTATHIONE S-TRANSFERASE TAU 4 (ATGSTU4);GLUTATHIONE S-TRANSFERASE TAU 4 (GSTU4);GLUTATHIONE S-TRANSFERASE 22 (GST22)		3.20973	0.00227619		0.584534	0.715041		3.46859	0.00626378		2.42095		UP	-	UP	-		-	-	not reported	-
AT1G08630	Encodes a threonine aldolase, involved in threonine degradation to glycine. Primarily expressed in seeds and seedlings. protein_coding THREONINE ALDOLASE 1 (THA1) THREONINE ALDOLASE 1 (THA1)		4.16993	3.75e-07		-0.0776268	0.981748		3.15672	2.41e-05		2.41634		UP	-	UP	-		-	-	not reported	-
AT5G62280	DUF1442 family protein (DUF1442);(source:Araport11) protein_coding		2.39832	0.000369804		1.01538	0.0597859		3.74301	0.000100812		2.38557		UP	-	UP	-		-	YES	YES	-
AT3G55720	replication factor C subunit, putative (DUF620);(source:Araport11) protein_coding BOUNDARY OF ROP DOMAIN7 (BDR7) BOUNDARY OF ROP DOMAIN7 (BDR7)		2.2792	0.000969495		1.12751	0.0574225		3.42058	0.000370328		2.27576		UP	-	UP	-		-	-	not reported	-
AT4G07960	encodes a gene similar to cellulose synthase protein_coding CELLULOSE-SYNTHASE-LIKE C12 (CSLC12) CELLULOSE-SYNTHASE LIKE C12 (CSLC12);CELLULOSE-SYNTHASE-LIKE C12 (CSLC12);CELLULOSE-SYNTHASE-LIKE C12 (ATCSLC12)		2.0647	0.000180044		0.812669	0.0527823		3.29458	4.27e-05		2.05732		UP	-	UP	-		-	-	not reported	-
AT1G73830	Encodes the brassinosteroid signaling component BEE3 (BR-ENHANCED EXPRESSION 3). Positively modulates the shade avoidance syndrome in Arabidopsis seedlings. protein_coding BR ENHANCED EXPRESSION 3 (BEE3) BR ENHANCED EXPRESSION 3 (BEE3)		3.47537	5.47e-05		0.399119	0.672539		2.19332	0.00604701		2.0226		UP	-	UP	-		-	YES	YES	-
AT2G17880	Chaperone DnaJ-domain superfamily protein;(source:Araport11) protein_coding DNA J PROTEIN C24 (DJC24) DNA J PROTEIN C24 (DJC24)		1.00346	0.0476371		0.290771	0.773631		4.63442	2.41e-05		1.97622		UP	-	UP	-		-	YES	YES	-
AT2G46860	Encodes a protein that might have inorganic pyrophosphatase activity. protein_coding PYROPHOSPHORYLASE 3 (PPa3) PYROPHOSPHORYLASE 3 (PPa3);PYROPHOSPHORYLASE 3 (AtPPa3)		1.88377	0.00266254		0.790576	0.185253		3.21617	0.000436674		1.9635		UP	-	UP	-		-	-	not reported	-
AT4G26880	Stigma-specific Stig1 family protein;(source:Araport11) protein_coding		1.63373	0.00842735		0.899618	0.14677		3.11143	0.00082192		1.8816		UP	-	UP	-		-	-	not reported	-
AT5G59540	2-oxoglutarate (2OG) and Fe(II)-dependent oxygenase superfamily protein;(source:Araport11) protein_coding		1.96453	4.34e-05		0.609442	0.064355		2.7422	2.89e-05		1.77206		UP	-	UP	-		-	YES	YES	-
AT5G07450	cyclin p4;(source:Araport11) protein_coding CYCLIN P4;3 (CYCP4;3) CYCLIN P4;3 (CYCP4;3)		1.86254	0.000993697		0.705304	0.157666		2.49198	0.00082192		1.68661		UP	-	UP	-		YES	-	not reported	-
AT3G55250	Encodes a nucleus-encoded protein, Photosystem I Assembly 3 (PSA3), that is required for PSI accumulation. protein_coding PIGMENT DEFECTIVE 329 (PDE329) PHOTOSYSTEM I ASSEMBLY 3 (PSA3);PIGMENT DEFECTIVE 329 (PDE329)		2.27715	1.53e-06		0.423683	0.0824963		2.325	1.14e-05		1.67528		UP	-	UP	-		YES	YES	no	-
AT3G01730	Mutants exhibit shorter root hairs under phosphate-deficient conditions. protein_coding		1.67949	0.0309741		1.11296	0.183047		2.22723	0.0270626		1.67323		UP	-	UP	-		-	-	not reported	-
AT3G01970	member of WRKY Transcription Factor; Group I protein_coding WRKY DNA-BINDING PROTEIN 45 (WRKY45) WRKY DNA-BINDING PROTEIN 45 (WRKY45);WRKY DNA-BINDING PROTEIN 45 (ATWRKY45)		2.54173	0.00148138		-0.109446	0.996257		2.57471	0.00617073		1.669		UP	-	UP	-		-	YES	YES	-
AT5G26731	hypothetical protein;(source:Araport11) protein_coding		2.09002	8.47e-05		0.744104	0.0525016		2.16224	0.000404825		1.66545		UP	-	UP	-		-	-	not reported	-
AT1G33260	Protein kinase superfamily protein;(source:Araport11) protein_coding		1.81105	0.00320534		0.415694	0.62353		2.73896	0.00111906		1.65523		UP	-	UP	-		-	YES	YES	-
AT4G35210	carrier protein (DUF241);(source:Araport11) protein_coding		2.29123	0.000312667		0.0227465	0.998915		2.49112	0.000953054		1.6017		UP	-	UP	-		-	-	not reported	-
AT1G69490	Encodes a member of the NAC transcription factor gene family. It is expressed in floral primordia and upregulated by AP3 and PI. Its expression is associated with leaf senescence. The mRNA is cell-to-cell mobile. protein_coding NAC-LIKE, ACTIVATED BY AP3/PI (NAP) NAC-LIKE, ACTIVATED BY AP3/PI (ATNAP);ARABIDOPSIS NAC DOMAIN CONTAINING PROTEIN 29 (ANAC029);NAC-LIKE, ACTIVATED BY AP3/PI (NAP)		1.87298	0.00286207		0.240198	0.866702		2.68902	0.00142023		1.60073		UP	-	UP	-		-	-	not reported	-
AT4G29190	Zinc finger C-x8-C-x5-C-x3-H type family protein;(source:Araport11) protein_coding OXIDATION-RELATED ZINC FINGER 2 (OZF2) OXIDATION-RELATED ZINC FINGER 2 (OZF2);ARABIDOPSIS THALIANA OXIDATION-RELATED ZINC FINGER 2 (ATOZF2);TANDEM ZINC FINGER 3 (TZF3); (ATTZF3); (ATC3H49)		2.08451	4.97e-05		0.196301	0.769181		2.51611	8.91e-05		1.59898		UP	-	UP	-		-	YES	no	-
AT1G79860	Encodes a member of KPP-like gene family, homolog of KPP (kinase partner protein) gene in tomato. Also a member of the RopGEF (guanine nucleotide exchange factor) family, containing the novel PRONE domain (plant-specific Rop nucleotide exchanger), which is exclusively active towards members of the Rop subfamily. Coexpression of AtPRK2a with AtRopGEF12 resulted in isotropic pollen tube growth Grow…		1.41493	0.0018335		0.71704	0.0773592		2.60445	0.000172014		1.57881		UP	-	UP	-		-	-	not reported	-
AT3G49380	IQ-domain 15;(source:Araport11) protein_coding IQ-DOMAIN 15 (iqd15) IQ-DOMAIN 15 (iqd15)		2.03045	7.33e-05		0.648644	0.0746589		1.87426	0.000811657		1.51779		UP	-	UP	-		-	-	not reported	-
AT5G14780	Encodes a NAD-dependent formate dehydrogenase. protein_coding FORMATE DEHYDROGENASE (FDH) (ATFDH1);FORMATE DEHYDROGENASE (FDH)		2.28598	0.00122219		0.467575	0.601123		1.77021	0.0221971		1.50792		UP	-	UP	-		-	YES	YES	-
AT1G27740	Basic helix-loop-helix (bHLH) transcription factor that is sufficient to promote postmitotic cell growth in root-hair cells. RSL4 is a direct transcriptional target of RHD6 protein_coding ROOT HAIR DEFECTIVE 6-LIKE 4 (RSL4) ROOT HAIR DEFECTIVE 6-LIKE 4 (RSL4)		1.36339	0.02864		0.767899	0.275267		2.31391	0.0065502		1.48173		UP	-	UP	-		YES	YES	YES	-
AT3G16770	Encodes a member of the ERF (ethylene response factor) subfamily B-2 of the plant specific ERF/AP2 transcription factor family (RAP2.3). The protein contains one AP2 domain. There are 5 members in this subfamily including RAP2.2 AND RAP2.12.It is localized to the nucleus and acts as a transcriptional activator through the GCC-box. It has been identified as a suppressor of Bax-induced cell death b…		2.39384	0.000248683		0.726654	0.163827		1.25454	0.0472628		1.45834		UP	-	UP	-		-	YES	YES	TF
AT1G03790	Encodes SOMNUS (SOM), a nucleus-localized CCCH-type zinc finger protein. SOM negatively regulates light-dependent seed germination downstream of PIL5 (AT2G20180). protein_coding SOMNUS (SOM) SOMNUS (SOM); (ATTZF4);TANDEM CCCH ZINC FINGER PROTEIN 4 (TZF4)		1.74414	0.000726206		-0.0199335	0.998915		2.63545	0.000261922		1.45322		UP	-	UP	-		-	-	not reported	-
AT3G60550	cyclin p3;(source:Araport11) protein_coding CYCLIN P3;2 (CYCP3;2) CYCLIN P3;2 (CYCP3;2)		1.45591	0.017035		0.984089	0.1132		1.84159	0.0179527		1.4272		UP	-	UP	-		YES	YES	YES	-
AT2G18350	homeobox protein 24;(source:Araport11) protein_coding HOMEOBOX PROTEIN 24 (HB24) HOMEOBOX PROTEIN 24 (AtHB24);HOMEOBOX PROTEIN 24 (HB24);ZINC FINGER HOMEODOMAIN 6 (ZHD6)		2.24751	1.19e-05		0.384589	0.264582		1.50145	0.00123557		1.37785		UP	-	UP	-		YES	YES	YES	-
AT1G60010	D-ribose-binding periplasmic protein;(source:Araport11) protein_coding		2.24051	9.22e-05		0.793201	0.0562097		1.0367	0.0449669		1.3568		UP	-	UP	-		-	YES	no	-
AT2G40670	response regulator 16 protein_coding RESPONSE REGULATOR 16 (RR16) RESPONSE REGULATOR 16 (RR16)		2.34642	0.000967865		-0.129721	0.981748		1.81028	0.0184019		1.34233		UP	-	UP	-		-	-	not reported	-
AT4G26220	Encodes a caffeoyl-coenzyme A O-methyltransferase (CCoAOMT)-like protein with a strong preference for methylating the para position of flavanones and dihydroflavonols, whereas flavones and flavonols are methylated in the meta-position. protein_coding CAFFEOYL COENZYME A ESTER O-METHYLTRANSFERASE 7 (CCOAOMT7) CAFFEOYL COENZYME A ESTER O-METHYLTRANSFERASE 7 (CCOAOMT7)		1.73562	0.00205668		0.481826	0.44962		1.63564	0.0126808		1.28436		UP	-	UP	-		YES	-	not reported	-
AT4G12410	SAUR-like auxin-responsive protein family;(source:Araport11) protein_coding SMALL AUXIN UPREGULATED RNA 35 (SAUR35) SMALL AUXIN UPREGULATED RNA 35 (SAUR35)		2.35861	1.25e-05		0.0883861	0.956444		1.31653	0.00412728		1.25451		UP	-	UP	-		-	YES	YES	-
AT4G35200	hypothetical protein (DUF241);(source:Araport11) protein_coding		1.10417	0.0451955		-0.13652	0.970651		2.78404	0.00111378		1.25056		UP	-	UP	-		-	-	not reported	-
AT5G64120	Encodes a cell wall bound peroxidase that is induced by hypo-osmolarity and is involved in the lignification of cell walls. protein_coding PEROXIDASE 71 (PRX71) (ATPRX71);PEROXIDASE 71 (PRX71)		1.58211	0.00407191		0.6082	0.287725		1.46165	0.0246227		1.21732		UP	-	UP	-		-	-	not reported	-
AT3G53540	afadin;(source:Araport11) protein_coding TON1 RECRUITING MOTIF 19 (TRM19) TON1 RECRUITING MOTIF 19 (TRM19)		1.24346	0.00296836		0.670283	0.0825688		1.60764	0.00288971		1.1738		UP	-	UP	-		-	-	not reported	-
AT2G36080	Encodes a plant-specific B3 DNA-binding domain transcription factor. Has transcription repressor activity. protein_coding ABNORMAL SHOOT 2 (ABS2) NGATHA-LIKE 1 (NGAL1);ABNORMAL SHOOT 2 (ABS2)		1.10469	0.000308874		0.336301	0.180791		2.06209	2.68e-05		1.16769		UP	-	UP	-		-	YES	YES	-
AT5G15210	Encodes ZFHD3, a member of the zinc finger homeodomain transcriptional factor family. protein_coding HOMEOBOX PROTEIN 30 (HB30) HOMEOBOX PROTEIN 30 (ATHB30);ZINC FINGER HOMEODOMAIN 8 (ZHD8);HOMEOBOX PROTEIN 30 (HB30);ZINC FINGER HOMEODOMAIN 3 (ZFHD3)		1.68145	0.000171343		0.394954	0.292557		1.42166	0.00272586		1.16602		UP	-	UP	-		-	YES	no	-
AT1G59940	Type A response regulator highly similar to bacterial two-component response regulators. Rapidly induced by cytokinin. Involved in red-light signaling. Acts redundantly with ARR3 in the control of circadian period in a cytokinin-independent manner. protein_coding RESPONSE REGULATOR 3 (ARR3) RESPONSE REGULATOR 3 (ARR3)		1.85497	7.33e-05		-0.095544	0.94352		1.72253	0.000783398		1.16065		UP	-	UP	-		YES	YES	YES	-
AT4G36110	SAUR-like auxin-responsive protein family;(source:Araport11) protein_coding SMALL AUXIN UPREGULATED RNA 9 (SAUR9) SMALL AUXIN UPREGULATED RNA 9 (SAUR9)		1.63933	0.000301748		0.279154	0.582653		1.54827	0.0022667		1.15559		UP	-	UP	-		YES	-	not reported	-
AT1G67340	HCP-like superfamily protein with MYND-type zinc finger;(source:Araport11) protein_coding		1.6371	0.000425427		0.697461	0.0646157		1.10149	0.0200978		1.14535		UP	-	UP	-		-	-	not reported	-
AT2G25940	Encodes a vacuolar processing enzyme belonging to a novel group of cysteine proteinases that is expressed in vegetative organs and is upregulated in association with various types of cell death and under stressed conditions. protein_coding ALPHA-VACUOLAR PROCESSING ENZYME (ALPHA-VPE) ALPHA-VACUOLAR PROCESSING ENZYME (ALPHA-VPE);ASPARAGINYL ENDOPEPTIDASE 1 (AEP1); (ALPHAVPE)		1.71558	0.0012634		0.139193	0.937065		1.56952	0.00948066		1.14143		UP	-	UP	-		-	YES	YES	-
AT4G18470	Negative regulator of systemic acquired resistance (SAR), repressor of pathogenesis-related PR gene expression which is removed by NPR1 upon induction of SAR. Encodes leucine-rich nuclear protein. Conserved in plants, with putative orthologs found in several plant species. Many NPR1-dependent PR gene are specifically derepressed in the sni1 mutant. The structural similarity of SNI1 to Armadillo r…		1.69259	0.00155697		0.340137	0.632588		1.36	0.0223064		1.13091		UP	-	UP	-		YES	-	not reported	-
AT1G48690	Auxin-responsive GH3 family protein;(source:Araport11) protein_coding		1.50186	0.00179698		0.755606	0.0789071		1.12671	0.0360758		1.12806		UP	-	UP	-		-	YES	YES	-
AT2G34650	Encodes a protein serine/threonine kinase that may act as a positive regulator of cellular auxin efflux, as a a binary switch for PIN polarity, and as a negative regulator of auxin signaling. Recessive mutants exhibit similar phenotypes as pin-formed mutants in flowers and inflorescence but distinct phenotypes in cotyledons and leaves. Expressed in the vascular tissue proximal to root and shoot m…		1.75028	0.00050649		0.2685	0.682323		1.2666	0.015971		1.09512		UP	-	UP	-		-	YES	YES	-
AT1G77120	Catalyzes the reduction of acetaldehyde using NADH as reductant. Requires zinc for activity. Dimer. Anaerobic response polypeptide (ANP). Fermentation. The protein undergoes thiolation following treatment with the oxidant tert-butylhydroperoxide. The mRNA is cell-to-cell mobile. protein_coding ALCOHOL DEHYDROGENASE 1 (ADH1) ALCOHOL DEHYDROGENASE 1 (ADH1); (ATADH1);ARABIDOPSIS THALIANA ALCOHOL DEH…		1.20519	0.0103871		0.887598	0.0569548		1.18253	0.0419163		1.09177		UP	-	UP	-		-	-	not reported	-
AT5G44260	Encodes a Tandem CCCH Zinc Finger protein. Interacts and co-localizes with MARD1 and RD21A in processing bodies (PBs) and stress granules (SGs). protein_coding TANDEM CCCH ZINC FINGER PROTEIN 5 (TZF5) TANDEM CCCH ZINC FINGER PROTEIN 5 (TZF5); (ATTZF5)		0.61067	0.0359332		0.125118	0.868115		2.5242	2.89e-05		1.08666		UP	-	UP	-		-	YES	YES	-
AT2G43840	UGT74F1 transfers UDP:glucose to salicylic acid (forming a glucoside), benzoic acid, quercetin, and athranilate in vitro. UGT74F1 shows a weak ability to catalyze the formation of the p-aminobenzoate-glucose ester in vitro. But, UGT75B1 appears to be the dominant pABA acylglucosyltransferase in vivo based on assays in leaves, flowers, and siliques. The true biological substrate(s) of UGT74F1 are …		1.71118	0.00018442		0.173436	0.811954		1.3307	0.00485118		1.07177		UP	-	UP	-		-	-	not reported	-
AT1G01750	actin depolymerizing factor 11;(source:Araport11) protein_coding ACTIN DEPOLYMERIZING FACTOR 11 (ADF11) ACTIN DEPOLYMERIZING FACTOR 11 (ADF11)		1.0553	0.0230339		0.663666	0.177824		1.47023	0.0150949		1.06306		UP	-	UP	-		-	-	not reported	-
AT5G25110	member of AtCIPKs protein_coding CBL-INTERACTING PROTEIN KINASE 25 (CIPK25) SNF1-RELATED PROTEIN KINASE 3.25 (SnRK3.25);CBL-INTERACTING PROTEIN KINASE 25 (CIPK25)		1.01213	0.00381772		0.521694	0.113984		1.61869	0.000953054		1.05084		UP	-	UP	-		-	-	not reported	-
AT5G03640	AGCVIII kinase involved in the pulse-induced first positive phototropism. protein_coding AGCVIIIA KINASE 1-8 (AGC1-8)		0.931234	0.0406647		0.481712	0.396385		1.72961	0.00618095		1.04752		UP	-	UP	-		-	-	not reported	-
AT2G47270	Encodes UPBEAT1 (UPB1), a transcription factor with a bHLH domain. Regulates the expression of a set of peroxidases that modulate the balance of reactive oxygen species (ROS) between the zones of cell proliferation and the zone of cell elongation where differentiation begins. Disruption of UPB1 activity alters this ROS balance, leading to a delay in the onset of differentiation. protein_coding UP…		1.19443	0.00533041		0.556706	0.193421		1.36594	0.010288		1.03903		UP	-	UP	-		YES	-	not reported	-
AT1G50040	formin-like protein, putative (DUF1005);(source:Araport11) protein_coding		1.12571	0.00996314		0.0237491	0.998915		1.95937	0.00165412		1.03627		UP	-	UP	-		-	YES	YES	-
AT2G24070	QWRF motif protein (DUF566);(source:Araport11) protein_coding QWRF DOMAIN CONTAINING 4 (QWRF4) QWRF DOMAIN CONTAINING 4 (QWRF4)		1.37862	0.000406184		0.176077	0.764534		1.49646	0.00120922		1.01705		UP	-	UP	-		-	-	not reported	-
AT1G79320	Encodes a putative metacaspase. Arabidopsis contains three type I MCP genes (MCP1a-c) and six type II MCP genes (MCP2a?f): AtMCP1a/At5g64240, AtMCP1b/At1g02170, AtMCP1c/At4g25110, AtMCP2a/At1g79310, AtMCP2b/At1g79330, AtMCP2c/At1g79320, AtMCP2d/At1g79340, AtMCP2e/At1g16420, AtMCP2f/At5g04200. protein_coding METACASPASE 6 (MC6) METACASPASE 6 (AtMC6);METACASPASE 2C (AtMCP2c);METACASPASE 6 (MC6);MET…		1.24132	0.00801743		0.264073	0.749696		1.53016	0.0100994		1.01185		UP	-	UP	-		-	YES	YES	-
AT4G24480	Protein kinase superfamily protein;(source:Araport11) protein_coding		1.25262	0.00349837		0.240232	0.724717		1.5427	0.00466051		1.01185		UP	-	UP	-		-	YES	no	-
AT3G29635	HXXXD-type acyl-transferase family protein;(source:Araport11) protein_coding		1.19549	0.0175873		0.0463318	0.998915		1.77351	0.00800767		1.00511		UP	-	UP	-		-	-	not reported	-
AT5G49690	UDP-Glycosyltransferase superfamily protein;(source:Araport11) protein_coding		1.43179	0.00231967		0.229675	0.78225		1.33014	0.0146456		0.9972		UP	-	UP	-		YES	YES	YES	-
AT4G23510	Disease resistance protein (TIR-NBS-LRR class) family;(source:Araport11) protein_coding		1.19789	0.0013243		0.613184	0.0605634		1.16345	0.00703634		0.99151		UP	-	UP	-		YES	YES	YES	-
AT5G22270	hypothetical protein;(source:Araport11) protein_coding SALT-INDUCED AND EIN3/EIL1-DEPENDENT 1 (SIED1) SALT-INDUCED AND EIN3/EIL1-DEPENDENT 1 (SIED1)		1.12016	0.0237547		0.467891	0.468057		1.38378	0.0292344		0.990613		UP	-	UP	-		-	YES	YES	-
AT3G61440	Encodes a cysteine synthase isomer CysC1. The isomer is however less effective in cysteine biosynthesis. It is involved in beta-cyanoalanine biosynthesis, an intermediate of cyanide detoxification pathway. The mRNA is cell-to-cell mobile. protein_coding CYSTEINE SYNTHASE C1 (CYSC1) CYSTEINE SYNTHASE C1 (ATCYSC1);?-CYANOALANINE SYNTHASE C1 (CAS-C1);CYSTEINE SYNTHASE C1 (CYSC1);BETA-SUBSTITUTED ALA…		1.29252	0.000168631		0.388241	0.141282		1.25671	0.00108663		0.979157		UP	-	UP	-		YES	YES	YES	-
AT1G55290	encodes a protein whose sequence is similar to oxidoreductase, 2OG-Fe(II) oxygenase protein_coding (F6'H2) (F6'H2)		0.848891	0.0276278		0.467418	0.286339		1.61175	0.00334508		0.976019		UP	-	UP	-		-	-	not reported	-
AT4G27290	S-locus lectin protein kinase family protein;(source:Araport11) protein_coding		1.08436	0.0178347		0.444903	0.440368		1.39014	0.01752		0.973135		UP	-	UP	-		YES	YES	not detected	-
AT5G49700	Putative AT-hook DNA-binding family protein;(source:Araport11) protein_coding AT-HOOK MOTIF NUCLEAR LOCALIZED PROTEIN 17 (AHL17) AT-HOOK MOTIF NUCLEAR LOCALIZED PROTEIN 17 (AHL17)		1.12986	0.0162608		0.412655	0.510349		1.36642	0.0218318		0.969644		UP	-	UP	-		-	-	not reported	-
AT4G09570	Encodes a member of Calcium Dependent Protein Kinase (CDPK) gene family.Positive regulator of ABA signaling. Phosphorylates ABA responsive transcription factors ABF1 and ABF4. protein_coding CALCIUM-DEPENDENT PROTEIN KINASE 4 (CPK4) CALCIUM-DEPENDENT PROTEIN KINASE 4 (CPK4); (ATCPK4)		1.23086	0.0025922		0.638076	0.0881482		1.03889	0.0265182		0.969275		UP	-	UP	-		-	YES	no	-
AT1G66440	Cysteine/Histidine-rich C1 domain family protein;(source:Araport11) protein_coding		0.955595	0.0162782		0.661481	0.100765		1.27114	0.0136476		0.962739		UP	-	UP	-		-	-	not reported	-
AT4G21780	hypothetical protein;(source:Araport11) protein_coding		1.92138	1.09e-05		0.253869	0.450165		0.709774	0.0341592		0.961674		UP	-	UP	-		-	-	not reported	-
AT3G11690	hypothetical protein;(source:Araport11) protein_coding		1.17386	0.000698633		0.48907	0.0933533		1.2209	0.00272586		0.961279		UP	-	UP	-		YES	YES	YES	-
AT5G60630	transmembrane protein;(source:Araport11) protein_coding		1.58665	0.000506385		-0.353273	0.454684		1.64265	0.00209851		0.958676		UP	-	UP	-		-	-	not reported	-
AT3G10040	Encodes HRA1 (HYPOXIA RESPONSE ATTENUATOR1), a low oxygen-inducible transcription factor. protein_coding HYPOXIA RESPONSE ATTENUATOR1 (HRA1) HYPOXIA RESPONSE ATTENUATOR1 (HRA1)		0.911897	0.013438		0.366755	0.411867		1.59532	0.00227003		0.957992		UP	-	UP	-		-	-	not reported	-
AT4G37890	Zinc finger (C3HC4-type RING finger) family protein;(source:Araport11) protein_coding EMBRYO SAC DEVELOPMENT ARREST 40 (EDA40) EMBRYO SAC DEVELOPMENT ARREST 40 (EDA40)		1.1076	0.000239809		0.318993	0.190694		1.41449	0.000266165		0.94703		UP	-	UP	-		-	YES	YES	-
AT1G79470	Aldolase-type TIM barrel family protein;(source:Araport11) protein_coding		1.35449	0.000161427		0.494026	0.0677166		0.988924	0.00604701		0.945814		UP	-	UP	-		-	-	not reported	-
AT1G05010	Encodes 1-aminocyclopropane-1-carboxylate oxidase protein_coding ETHYLENE-FORMING ENZYME (EFE) ETHYLENE-FORMING ENZYME (EFE); (EAT1);ETHYLENE FORMING ENZYME (ACO4)		1.40051	0.000932721		0.131382	0.904305		1.2631	0.00792804		0.931665		UP	-	UP	-		YES	YES	YES	Synthesis
AT1G77640	encodes a member of the DREB subfamily A-5 of ERF/AP2 transcription factor family. The protein contains one AP2 domain. There are 15 members in this subfamily including RAP2.1, RAP2.9 and RAP2.10. protein_coding		0.982303	0.0458207		0.323052	0.70378		1.48363	0.0218759		0.929663		UP	-	UP	-		-	YES	YES	-
AT2G32560	F-box family protein;(source:Araport11) protein_coding		1.21408	0.000409301		0.427938	0.128273		1.13492	0.00322619		0.925646		UP	-	UP	-		YES	YES	YES	-
AT1G18100	Encodes a member of the FT and TFL1 family of phosphatidylethanolamine-binding proteins. It is expressed in seeds and up-regulated in response to ABA. Loss of function mutants show decreased rate of germination in the presence of ABA. ABA dependent regulation is mediated by both ABI3 and ABI5. ABI5 promotes MFT expression, primarily in the radicle-hypocotyl transition zone and ABI3 suppresses it …		1.48758	0.0208911		-0.445552	0.662993		1.72653	0.0355948		0.922855		UP	-	UP	-		-	YES	YES	-
AT2G29480	Encodes glutathione transferase belonging to the tau class of GSTs. Naming convention according to Wagner et al. (2002). protein_coding GLUTATHIONE S-TRANSFERASE TAU 2 (GSTU2) GLUTATHIONE S-TRANSFERASE TAU 2 (ATGSTU2);GLUTATHIONE S-TRANSFERASE TAU 2 (GSTU2);GLUTATHIONE S-TRANSFERASE 20 (GST20)		1.44676	0.000516804		0.159688	0.834666		1.08972	0.0135199		0.898723		UP	-	UP	-		-	-	not reported	-
AT5G11950	Encodes a protein of unknown function. It has been crystallized and shown to be structurally almost identical to the protein encoded by At2G37210. protein_coding LONELY GUY 8 (LOG8) (MOBP2);LONELY GUY 8 (LOG8)		1.46984	0.000169567		0.131961	0.84691		1.02527	0.00807136		0.87569		UP	-	UP	-		-	YES	no	-
AT1G32200	Encodes a chloroplast glycerol-3-phosphate acyltransferase.Involved in the biosynthesis of chloroplast phosphatidylglycerol. protein_coding (ATS1) (ATS1);ACYLTRANSFERASE 1 (ACT1)		0.69987	0.0432142		0.448072	0.250552		1.46132	0.00342781		0.869754		UP	-	UP	-		-	YES	no	-
AT1G79700	WRI4 encodes an AP2/ERF-type transcriptional activator that specifically controls cuticular wax biosynthesis in Arabidopsis stems. It also functions to activate transcription of genes involved fatty acid biosynthesis during seed and flower development as well as stem wax biosynthesis. Targets identified by ChIP-seq include: LACS1, KCR1, PAS2, ECR, and WSD1. protein_coding WRINKLED 4 (WRI4) WRINKL…		1.1143	0.000428341		-0.262504	0.391463		1.71841	0.000126813		0.856736		UP	-	UP	-		-	YES	YES	-
AT5G07010	Encodes a sulfotransferase that acts specifically on 11- and 12-hydroxyjasmonic acid. Transcript levels for this enzyme are increased by treatments with jasmonic acid (JA), 12-hydroxyJA, JA-isoleucine, and 12-oxyphytodienoic acid (a JA precursor). protein_coding SULFOTRANSFERASE 2A (ST2A) SULFOTRANSFERASE 2A (ST2A);ARABIDOPSIS THALIANA SULFOTRANSFERASE 2A (ATST2A)		1.34217	0.000610792		0.243597	0.608981		0.98088	0.0171167		0.855547		UP	-	UP	-		-	YES	YES	-
AT5G53500	Transducin/WD40 repeat-like superfamily protein;(source:Araport11) protein_coding		0.818666	0.00470976		0.164781	0.726519		1.58289	0.000370328		0.855444		UP	-	UP	-		-	YES	no	-
AT3G27580	D6PK family kinase involved in pulse-induced phototropism but also for time-dependent second positive phototropism, and continuous light-induced hypocotyl phototropism.D6PKL3 is polarly localized within the plasma membrane. It is involved in pollen aperture formation. The protein is localized within distinct regions of the pollen plasma membrane and mutants are also defective in pollen aperture f…		1.17019	0.00175098		0.424363	0.233882		0.956266	0.0225322		0.850272		UP	-	UP	-		-	-	not reported	-
AT1G25320	Leucine-rich repeat protein kinase family protein;(source:Araport11) protein_coding		0.783624	0.00258422		0.253298	0.360991		1.50878	0.000179944		0.848567		UP	-	UP	-		YES	-	not reported	-
AT4G27520	early nodulin-like protein 2;(source:Araport11) protein_coding EARLY NODULIN-LIKE PROTEIN 2 (ENODL2) EARLY NODULIN-LIKE PROTEIN 2 (ENODL2); (AtENODL2)		1.19336	0.000623269		0.256708	0.500713		1.09478	0.00519216		0.848282		UP	-	UP	-		-	-	not reported	-
AT5G53970	Encodes a cytosolic tyrosine aminotransferase which is strongly induced upon aging and coronatine treatment. AtTAT1 prefers Tyr as an amino donor but can also use Phe, Trp, His, Met, and Leu. The mRNA is cell-to-cell mobile. protein_coding TYROSINE AMINOTRANSFERASE 7 (TAT7) TYROSINE AMINOTRANSFERASE 7 (TAT7); (TAT1);TYR AMINOTRANSFERASE 1 (ATTAT1)		0.763633	0.0108706		0.202479	0.661566		1.55633	0.000738094		0.840814		UP	-	UP	-		-	-	not reported	-
AT1G26930	Galactose oxidase/kelch repeat superfamily protein;(source:Araport11) protein_coding		0.982943	0.00463986		0.324992	0.418223		1.16221	0.00734219		0.823381		UP	-	UP	-		YES	YES	YES	-
AT1G61370	S-locus lectin protein kinase family protein;(source:Araport11) protein_coding		0.887483	0.0151692		0.408514	0.328008		1.1186	0.0162898		0.804866		UP	-	UP	-		-	YES	YES	-
AT4G00680	actin depolymerizing factor 8;(source:Araport11) protein_coding ACTIN DEPOLYMERIZING FACTOR 8 (ADF8) ACTIN DEPOLYMERIZING FACTOR 8 (ADF8)		0.789346	0.0421347		0.581145	0.163225		1.04376	0.0394275		0.80475		UP	-	UP	-		-	-	not reported	-
AT4G01870	tolB protein-like protein;(source:Araport11) protein_coding		1.07116	0.00174084		0.203056	0.673445		1.10787	0.00626378		0.794028		UP	-	UP	-		-	YES	YES	-
AT1G29120	Hydrolase-like protein family;(source:Araport11) protein_coding UP9 (UP9) UP9 (UP9)		1.05311	0.00040295		0.41867	0.081663		0.865002	0.0065502		0.778929		UP	-	UP	-		-	YES	no	-
AT3G43930	BRCT domain-containing DNA repair protein;(source:Araport11) protein_coding		1.02387	0.0159861		0.115816	0.95328		1.19435	0.0261284		0.778012		UP	-	UP	-		-	-	not reported	-
AT5G25360	hypothetical protein;(source:Araport11) protein_coding		0.748598	0.0185627		0.510564	0.116631		1.02365	0.0135744		0.760937		UP	-	UP	-		-	-	not reported	-
AT2G26290	root-specific kinase 1;(source:Araport11) protein_coding ROOT-SPECIFIC KINASE 1 (ARSK1) ROOT-SPECIFIC KINASE 1 (ARSK1)		0.811643	0.00665846		0.054372	0.987591		1.4018	0.00109664		0.755938		UP	-	UP	-		YES	YES	YES	-
AT5G44210	encodes a member of the ERF (ethylene response factor) subfamily B-1 of ERF/AP2 transcription factor family (ATERF-9). The protein contains one AP2 domain. There are 15 members in this subfamily including ATERF-3, ATERF-4, ATERF-7, and leafy petiole. protein_coding ERF DOMAIN PROTEIN 9 (ERF9) ERF DOMAIN PROTEIN 9 (ERF9);ERF DOMAIN PROTEIN- 9 (ATERF-9);ERF DOMAIN PROTEIN 9 (ATERF9)		0.707612	0.00987347		0.220838	0.55668		1.31865	0.00105702		0.749032		UP	-	UP	-		-	-	not reported	TF
AT1G12430	Encodes the kinesin-like protein PAK has an Armadillo motif tail and is involved in guard cell development in Arabidopsis (from Genbank record AF159052).However, no defect in stomatal complexes has been observed in loss of function mutations. It accumulates at the preprophase band (PPB) in a cell-cycle and microtubule-dependent manner and is most highly expressed in cells where the placement of t…		1.02521	0.000249768		0.406986	0.0616628		0.79113	0.00626378		0.741109		UP	-	UP	-		-	-	not reported	-
AT3G09780	CRINKLY4 related 1;(source:Araport11) protein_coding CRINKLY4 RELATED 1 (CCR1) CRINKLY4 RELATED 1 (CCR1); (ATCRR1)		0.92275	0.00398326		0.0241555	0.998915		1.2699	0.00266328		0.738936		UP	-	UP	-		-	-	not reported	-
AT1G44000	STAY-GREEN-like protein;(source:Araport11) protein_coding STAY-GREEN LIKE (SGRL) STAY-GREEN LIKE (SGRL)		0.80048	0.00828059		0.215015	0.629604		1.18649	0.003689		0.733994		UP	-	UP	-		-	-	not reported	-
AT5G02480	HSP20-like chaperones superfamily protein;(source:Araport11) protein_coding		0.818325	0.0249229		0.40001	0.35995		0.980537	0.0364462		0.732958		UP	-	UP	-		-	YES	YES	-
AT5G51670	hypothetical protein (DUF668);(source:Araport11) protein_coding		1.01625	0.000564845		0.0197293	0.998915		1.16137	0.00119696		0.732451		UP	-	UP	-		YES	-	not reported	-
AT1G27670	transmembrane protein;(source:Araport11) protein_coding		1.1226	0.00432755		0.0906317	0.966924		0.970213	0.0367281		0.727814		UP	-	UP	-		-	-	not reported	-
AT5G54960	pyruvate decarboxylase-2 protein_coding PYRUVATE DECARBOXYLASE-2 (PDC2) PYRUVATE DECARBOXYLASE-2 (PDC2)		1.28175	0.00089874		-0.0195893	0.998915		0.892874	0.030231		0.718344		UP	-	UP	-		-	-	not reported	-
AT3G52870	IQ calmodulin-binding motif family protein;(source:Araport11) protein_coding		1.01174	0.00802779		0.00360133	0.9993		1.1193	0.01752		0.711546		UP	-	UP	-		-	YES	no	-
AT4G16442	Uncharacterized protein family (UPF0497);(source:Araport11) protein_coding CASP-LIKE PROTEIN 2B1 (CASPL2B1) CASP-LIKE PROTEIN 2B1 (CASPL2B1)		0.910582	0.030471		0.125362	0.943219		1.07534	0.0472191		0.703761		UP	-	UP	-		-	YES	YES	-
AT5G66440	tRNA-methyltransferase non-catalytic subunit trm6MTase subunit;(source:Araport11) protein_coding		0.823407	0.0062323		0.184277	0.697489		1.08021	0.00556178		0.695965		UP	-	UP	-		-	YES	YES	-
AT4G26080	Involved in abscisic acid (ABA) signal transduction. Negative regulator of ABA promotion of stomatal closure. protein_coding ABA INSENSITIVE 1 (ABI1) (AtABI1);ABA INSENSITIVE 1 (ABI1)		1.02676	0.00123692		0.0288705	0.998915		0.97353	0.00757054		0.676386		UP	-	UP	-		-	YES	YES	-
AT2G40540	putative potassium transporter AtKT2p (AtKT2) mRNA, protein_coding POTASSIUM TRANSPORTER 2 (KT2) (KUP2); (TRK2); (ATKUP2);POTASSIUM TRANSPORTER 2 (KT2); (ATKT2); (SHY3)		0.739063	0.00805247		0.531857	0.05153		0.754349	0.0269817		0.67509		UP	-	UP	-		-	YES	YES	-
AT2G27440	pseudogene of rac GTPase activating protein pseudogene		1.14941	0.000357733		0.108482	0.863896		0.763476	0.0182974		0.673791		UP	-	UP	-		-	-	not reported	-
AT1G64470	---		0.82117	0.0362302		-0.0201231	0.998915		1.18391	0.0209277		0.661654		UP	-	UP	-		-	YES	YES	-
AT5G10960	Polynucleotidyl transferase, ribonuclease H-like superfamily protein;(source:Araport11) protein_coding CCR4-ASSOCIATED FACTOR 1I (CAF1I) CCR4-ASSOCIATED FACTOR 1I (CAF1I)		0.802419	0.00121047		0.426874	0.0486035		0.692045	0.0129651		0.640446		UP	-	UP	-		-	YES	no	-
AT4G01110	late embryogenesis abundant hydroxyproline-rich glycoprotein family protein;(source:Araport11) protein_coding		0.75675	0.00806619		0.108874	0.884425		1.05223	0.00519216		0.639285		UP	-	UP	-		-	-	not reported	-
AT1G72940	Toll-Interleukin-Resistance (TIR) domain-containing protein;(source:Araport11) protein_coding		0.803871	0.00934681		0.319671	0.371913		0.782628	0.0395268		0.63539		UP	-	UP	-		-	-	not reported	-
AT2G33170	Leucine-rich repeat receptor-like protein kinase family protein;(source:Araport11) protein_coding		0.618371	0.0396451		0.328911	0.371913		0.913942	0.0204162		0.620408		UP	-	UP	-		-	YES	no	-
AT2G36890	"Putative homolog of the Blind gene in tomato. Together with RAX1 and RAX3 belong to the class R2R3 MYB genes; encoded by the Myb-like transcription factor MYB38, regulates axillary meristem formation. " The mRNA is cell-to-cell mobile. protein_coding REGULATOR OF AXILLARY MERISTEMS 2 (RAX2) MYB DOMAIN PROTEIN 38 (MYB38);MYB DOMAIN PROTEIN 38 (ATMYB38);BLUE INSENSITIVE TRAIT 1 (BIT1);REGULATOR OF…		0.903885	0.000179355		0.0578895	0.928621		0.832905	0.00164188		0.598226		UP	-	UP	-		-	YES	YES	-
AT5G44910	Toll-Interleukin-Resistance (TIR) domain family protein;(source:Araport11) protein_coding		0.955545	0.000589821		-0.0719607	0.930106		0.83345	0.00643466		0.572345		UP	-	UP	-		-	-	not reported	-
AT1G70100	neurofilament heavy protein;(source:Araport11) protein_coding		0.651281	0.0178342		0.21037	0.603354		0.84821	0.0162298		0.569954		UP	-	UP	-		-	YES	no	-
AT4G10380	Boric acid channel. Essential for efficient boron uptake and plant development under boron limitation. Also functions in arsenite transport and tolerance. Localized preferentially in outer membrane domains of root cells. protein_coding NOD26-LIKE INTRINSIC PROTEIN 5;1 (NIP5;1) NOD26-LIKE MIP 8 (NLM8);NOD26-LIKE MIP 6 (NLM6); (AtNIP5;1);NOD26-LIKE INTRINSIC PROTEIN 5;1 (NIP5;1)		0.642537	0.00337497		0.357181	0.0795518		0.641853	0.0140301		0.54719		UP	-	UP	-		-	YES	YES	-
AT2G16790	P-loop containing nucleoside triphosphate hydrolases superfamily protein;(source:Araport11) protein_coding		0.897256	0.00095512		0.132115	0.757855		0.585837	0.0436957		0.538402		UP	-	UP	-		-	-	not reported	-
AT5G57960	GTP-binding protein, HflX;(source:Araport11) protein_coding (HFLX) (HFLX)		0.586776	0.0106599		0.0455823	0.984979		0.908743	0.00374056		0.5137		UP	-	UP	-		-	-	not reported	-
AT2G20560	DNAJ heat shock family protein;(source:Araport11) protein_coding DNAJ PROTEIN (DNAJ) DNAJ PROTEIN (DNAJ)		0.791295	0.00156537		0.026289	0.998915		0.677461	0.016137		0.498348		UP	-	UP	-		-	-	not reported	-
AT4G16760	Encodes a medium to long-chain acyl-CoA oxidase. Catalyzes the first step of fatty acid beta-oxidation. Involved in jasmonate biosynthesis. Gene expression is induced by wounding, drought stress, abscisic acid, and jasmonate. protein_coding ACYL-COA OXIDASE 1 (ACX1) (ATACX1);ACYL-COA OXIDASE 1 (ACX1)		0.633469	0.00920977		0.0936207	0.88287		0.719286	0.0172828		0.482125		UP	-	UP	-		-	-	not reported	-
AT1G22440	Zinc-binding alcohol dehydrogenase family protein;(source:Araport11) protein_coding		0.882334	0.0033642		-0.150934	0.780876		0.709984	0.0418963		0.480461		UP	-	UP	-		-	-	not reported	-
AT1G55930	CBS domain-containing protein / transporter associated domain-containing protein;(source:Araport11) protein_coding		0.529698	0.0274584		0.130949	0.788558		0.78027	0.0140301		0.480306		UP	-	UP	-		-	-	not reported	-
AT2G02220	Encodes a protein interacting with phytosulfokine, a five amino acid sulfated peptide (YIYTQ). Contains dual guanylate cyclase and kinase catalytic activities that operate in vivo. protein_coding PHYTOSULFOKIN RECEPTOR 1 (PSKR1) PHYTOSULFOKIN RECEPTOR 1 (PSKR1);PHYTOSULFOKIN RECEPTOR 1 (ATPSKR1)		0.588689	0.00840229		0.167806	0.595227		0.652355	0.018067		0.469617		UP	-	UP	-		YES	YES	no	-
AT3G49350	Ypt/Rab-GAP domain of gyp1p superfamily protein;(source:Araport11) protein_coding		0.519369	0.00349837		0.193825	0.290579		0.62401	0.00519216		0.445735		UP	-	UP	-		-	-	not reported	-
AT3G52850	Encodes the Vacuolar Sorting Receptor-1 (VSR-1)/Epidermal Growth Factor Receptor-like protein1(VSR-1/ATELP1). Binds vacuolar targeting signals. Involved in sorting seed storage proteins into vacuoles. The mRNA is cell-to-cell mobile. protein_coding VACUOLAR SORTING RECEPTOR HOMOLOG 1 (VSR1) VACUOLAR SORTING RECEPTOR HOMOLOG 1 (VSR1); (VSR-1); (BP80); (BP80B); (ATELP1); (ATVSR1);GREEN FLUORESCENT …		0.66556	0.00477407		0.0859695	0.888097		0.560841	0.0446538		0.437457		UP	-	UP	-		-	-	not reported	-
AT4G14930	Survival protein SurE-like phosphatase/nucleotidase;(source:Araport11) protein_coding		0.540879	0.0311337		0.0475547	0.988153		0.658563	0.0423125		0.415665		UP	-	UP	-		YES	YES	YES	-
AT1G73400	Pentatricopeptide repeat (PPR) superfamily protein;(source:Araport11) protein_coding		0.508098	0.00598638		-0.00240337	0.9993		0.667825	0.00535187		0.391173		UP	-	UP	-		-	-	not reported	-
AT1G20070	hypothetical protein;(source:Araport11) protein_coding		1.12427	0.00184723		0.387306	0.274166		-0.791099	0.049622		0.24016		UP	-	DOWN	-		-	-	not reported	-
AT3G10870	Encodes a methyl IAA esterase. Methyl IAA is believed to be an inactive form of auxin that needs to be demethylated to exert a biological effect. MES17 does not act on methyl JA, MeSA, MeGA4, or MEGA9 in vitro. This gene is expressed in several tissues of seedlings and adult plants, with a higher relative level of expression in the seedling shoot apex and the adult stem. protein_coding METHYL EST…		0.681285	0.0450305		-0.151915	0.859371		-1.14941	0.0124423		0.206679		UP	-	DOWN	-		-	-	not reported	-
AT5G57520	Encodes a zinc finger protein containing only a single zinc finger. protein_coding ZINC FINGER PROTEIN 2 (ZFP2) ZINC FINGER PROTEIN 2 (ATZFP2);ZINC FINGER PROTEIN 2 (ZFP2)		9.09267	2.58e-09		0.350049	0.441354		-0.0195907	0.999977		3.14104		UP	-	-	-		-	-	not reported	-
AT1G49570	Peroxidase superfamily protein;(source:Araport11) protein_coding		5.67399	0.000406184		1.17594	0.479188		1.22954	0.692457		2.69316		UP	-	-	-		YES	-	not reported	-
AT3G49700	encodes a a member of the 1-aminocyclopropane-1-carboxylate (ACC) synthase (S-adenosyl-L-methionine methylthioadenosine-lyase, EC 4.4.1.14) gene family. Mutants produce elevated levels of ethylene as etiolated seedlings. protein_coding 1-AMINOCYCLOPROPANE-1-CARBOXYLATE SYNTHASE 9 (ACS9) ETHYLENE OVERPRODUCING 3 (ETO3); (AtACS9);1-AMINOCYCLOPROPANE-1-CARBOXYLATE SYNTHASE 9 (ACS9)		6.87864	1.21e-07		0.284434	0.767286		0.569135	0.549578		2.5774		UP	-	-	-		-	-	not reported	Synthesis
AT4G12470	Encodes AZI1 (AZELAIC ACID INDUCED 1). Involved in the priming of salicylic acid induction and systemic immunity triggered by pathogen or azelaic acid. Targeting if AZI1 to chloroplasts is increased during SAR induction and that localization requires the PRR domain.It is involved in the uptake and movement of the azelaic acid signal. protein_coding AZELAIC ACID INDUCED 1 (AZI1) AZELAIC ACID INDUC…		2.79106	0.0376194		2.04851	0.152169		2.73802	0.12592		2.52586		UP	-	-	-		-	YES	YES	-
AT5G45950	GDSL-motif esterase/acyltransferase/lipase. Enzyme group with broad substrate specificity that may catalyze acyltransfer or hydrolase reactions with lipid and non-lipid substrates. protein_coding		7.537	3.6e-05		-0.16535	0.998163		-0.0113517	0.999977		2.45343		UP	-	-	-		-	-	not reported	-
AT2G44570	glycosyl hydrolase 9B12;(source:Araport11) protein_coding GLYCOSYL HYDROLASE 9B12 (GH9B12) GLYCOSYL HYDROLASE 9B12 (GH9B12);GLYCOSYL HYDROLASE 9B12 (AtGH9B12)		7.30028	1.06e-10		0.0008953	0.999445		-0.0248667	0.999977		2.42543		UP	-	-	-		-	YES	YES	-
AT3G53200	Member of the R2R3 factor gene family. protein_coding MYB DOMAIN PROTEIN 27 (MYB27) MYB DOMAIN PROTEIN 27 (MYB27);MYB DOMAIN PROTEIN 27 (AtMYB27)		3.30564	0.00361206		1.52057	0.162846		2.30863	0.0826242		2.37828		UP	-	-	-		-	YES	no	-
AT3G21500	Encodes a protein postulated to have 1-deoxy-D-xylulose 5-phosphate synthase activity. protein_coding 1-DEOXY-D-XYLULOSE 5-PHOSPHATE SYNTHASE 1 (DXPS1) 1-DEOXY-D-XYLULOSE 5-PHOSPHATE SYNTHASE 1 (DXPS1);DXS-LIKE 1 (DXL1);1-DEOXY-D-XYLULOSE 5-PHOSPHATE (DXP) SYNTHASE 2 (DXS2)		5.10976	0.000626377		0.174004	0.998117		1.74682	0.349616		2.34353		UP	-	-	-		-	-	not reported	-
AT5G54490	Encodes a PINOID (PID)-binding protein containing putative EF-hand calcium-binding motifs. The interaction is dependent on the presence of calcium. mRNA expression is up-regulated by auxin. Not a phosphorylation target of PID, likely acts upstream of PID to regulate the activity of this protein in response to changes in calcium levels. protein_coding PINOID-BINDING PROTEIN 1 (PBP1) PINOID-BINDING…		3.95187	0.00146901		0.945897	0.516591		2.05031	0.148992		2.31602		UP	-	-	-		-	YES	YES	-
AT3G48580	xyloglucan endotransglucosylase/hydrolase 11;(source:Araport11) protein_coding XYLOGLUCAN ENDOTRANSGLUCOSYLASE/HYDROLASE 11 (XTH11) XYLOGLUCAN ENDOTRANSGLUCOSYLASE/HYDROLASE 11 (XTH11)		3.98105	0.000135765		1.10587	0.166071		1.09839	0.342336		2.06177		UP	-	-	-		YES	-	not reported	-
AT1G29500	SAUR-like auxin-responsive protein family;(source:Araport11) protein_coding SMALL AUXIN UPREGULATED RNA 66 (SAUR66) SMALL AUXIN UPREGULATED RNA 66 (SAUR66)		5.00771	3.83e-06		0.445727	0.62107		0.658598	0.57092		2.03734		UP	-	-	-		-	-	not reported	-
AT2G27220	BEL1-like homeodomain 5;(source:Araport11) protein_coding BEL1-LIKE HOMEODOMAIN 5 (BLH5) BEL1-LIKE HOMEODOMAIN 5 (BLH5)		5.38744	0.00547074		0.580105	0.930106		-0.0164889	0.999977		1.98369		UP	-	-	-		-	-	not reported	-
AT3G60470	transmembrane protein, putative (DUF247);(source:Araport11) protein_coding		5.74618	5.22e-07		0.0567727	0.998915		0.00971811	0.999977		1.93756		UP	-	-	-		-	-	not reported	-
AT2G39400	alpha/beta-Hydrolases superfamily protein;(source:Araport11) protein_coding (MAGL6) (MAGL6)		2.63906	0.00334292		1.243	0.143241		1.84524	0.0774134		1.9091		UP	-	-	-		-	YES	YES	-
AT4G35190	Putative lysine decarboxylase family protein;(source:Araport11) protein_coding LONELY GUY 5 (LOG5) LONELY GUY 5 (LOG5)		3.76303	0.00790313		-0.100997	0.998915		2.0607	0.302018		1.90758		UP	-	-	-		-	YES	YES	-
AT2G17680	DUF241 domain protein, putative (DUF241);(source:Araport11) protein_coding		5.80735	1.78e-08		-0.11021	0.902913		-0.0368643	0.999977		1.88676		UP	-	-	-		-	-	not reported	-
AT1G19530	DNA polymerase epsilon catalytic subunit A;(source:Araport11) protein_coding		2.63717	0.022777		1.75993	0.144633		1.13701	0.680819		1.8447		UP	-	-	-		-	YES	YES	-
AT5G23270	Membrane localized sucrose transporter. protein_coding SUGAR TRANSPORTER 11 (STP11) SUGAR TRANSPORTER 11 (ATSTP11);SUGAR TRANSPORTER 11 (STP11)		5.56249	6.22e-05		-0.0394885	0.998915		-0.0102884	0.999977		1.83757		UP	-	-	-		-	-	not reported	-
AT5G57530	xyloglucan endotransglucosylase/hydrolase 12;(source:Araport11) protein_coding XYLOGLUCAN ENDOTRANSGLUCOSYLASE/HYDROLASE 12 (XTH12) (AtXTH12);XYLOGLUCAN ENDOTRANSGLUCOSYLASE/HYDROLASE 12 (XTH12)		2.08994	0.0225136		1.04767	0.323707		2.27611	0.0511365		1.80457		UP	-	-	-		-	-	not reported	-
AT4G15690	Encodes a member of the CC-type glutaredoxin (ROXY) family that has been shown to interact with the transcription factor TGA2 and suppress ORA59 promoter activity. protein_coding (GRXS5) (GRXS5); (ROXY12)		4.07994	4.1e-05		1.20741	0.0745809		-0.0169617	0.999977		1.75679		UP	-	-	-		-	-	not reported	-
AT4G24350	Phosphorylase superfamily protein;(source:Araport11) protein_coding		4.69795	0.000357733		0.562336	0.785335		-0.00415357	0.999977		1.75204		UP	-	-	-		-	-	not reported	-
AT1G29510	This locus was referred to as SAUR68 in PMID:17948056 but the nomenclature should be SAUR67. protein_coding SMALL AUXIN UPREGULATED RNA 67 (SAUR67) SMALL AUXIN UPREGULATED RNA 67 (SAUR67);SMALL AUXIN UPREGULATED 68 (SAUR68)		5.06206	6.61e-05		-0.014946	0.9993		0.201796	0.999977		1.74964		UP	-	-	-		-	-	not reported	-
AT3G05960	Encodes a hexose sugar transporter that is expressed in pollen. STP6 may play a role in providing sugars during late pollen maturation or pollen tube germination. protein_coding SUGAR TRANSPORTER 6 (STP6) SUGAR TRANSPORTER 6 (ATSTP6);SUGAR TRANSPORTER 6 (STP6)		5.15757	4.63e-07		0.0914361	0.985975		-0.0113934	0.999977		1.74587		UP	-	-	-		-	-	not reported	-
AT5G58830	Subtilisin-like serine endopeptidase family protein;(source:Araport11) protein_coding		5.23753	0.000114174		-0.0446635	0.998915		-0.0450539	0.999977		1.71594		UP	-	-	-		-	-	not reported	-
AT2G23060	Acyl-CoA N-acyltransferases (NAT) superfamily protein;(source:Araport11) protein_coding		5.16695	4.65e-07		-0.0671319	0.997265		2.34e-05	0.999977		1.69995		UP	-	-	-		-	-	not reported	-
AT1G35290	Thioesterase superfamily protein;(source:Araport11) protein_coding ACYL-LIPID THIOESTERASE 1 (ALT1) ACYL-LIPID THIOESTERASE 1 (ALT1)		4.31589	0.000676384		0.799736	0.605832		-0.0158196	0.999977		1.69994		UP	-	-	-		-	-	not reported	-
AT1G15580	auxin induced protein protein_coding INDOLE-3-ACETIC ACID INDUCIBLE 5 (IAA5) INDOLE-3-ACETIC ACID INDUCIBLE 5 (IAA5);AUXIN-INDUCIBLE 2-27 (AUX2-27); (ATAUX2-27)		4.91069	5.27e-08		0.128942	0.872371		-0.00418301	0.999977		1.67848		UP	-	-	-		-	-	not reported	-
AT1G77870	membrane-anchored ubiquitin-fold protein 5 precursor;(source:Araport11) protein_coding MEMBRANE-ANCHORED UBIQUITIN-FOLD PROTEIN 5 PRECURSOR (MUB5) MEMBRANE-ANCHORED UBIQUITIN-FOLD PROTEIN 5 PRECURSOR (MUB5)		4.84413	3.72e-08		0.136739	0.824676		-0.0167912	0.999977		1.65469		UP	-	-	-		-	-	not reported	-
AT3G52780	Purple acid phosphatases superfamily protein;(source:Araport11) protein_coding (PAP20) (ATPAP20); (PAP20)		4.60837	9.42e-07		0.367478	0.571807		-0.0131694	0.999977		1.65423		UP	-	-	-		YES	-	not reported	-
AT3G14395	Protein Involved in the Regulation of Herbivore-Associated Signaling Pathways, affecting the expression of genes involved in biosynthesis and signaling of the jasmonic acid and salicylic acid hormones. protein_coding MITE ATTACK TRIGGERED IMMUNITY 1 (MAT1) MITE ATTACK TRIGGERED IMMUNITY 1 (MAT1)		4.27227	4.63e-07		0.684052	0.0753991		-0.145433	0.999977		1.60363		UP	-	-	-		-	-	not reported	-
AT2G05380	glycine-rich protein 3 short isoform (GRP3S) mRNA, complete The mRNA is cell-to-cell mobile. protein_coding GLYCINE-RICH PROTEIN 3 SHORT ISOFORM (GRP3S) GLYCINE-RICH PROTEIN 3 SHORT ISOFORM (GRP3S)		3.50999	0.0410558		0.87476	0.819022		0.264682	0.999977		1.54981		UP	-	-	-		-	-	not reported	-
AT1G33840	LURP-one-like protein (DUF567);(source:Araport11) protein_coding		3.05774	0.00151382		1.23075	0.159225		0.338722	0.999977		1.5424		UP	-	-	-		-	-	not reported	-
AT1G19620	transmembrane protein;(source:Araport11) protein_coding		4.62869	1.02e-06		-0.0677318	0.997265		-0.00193928	0.999977		1.51967		UP	-	-	-		-	-	not reported	-
AT1G79160	filamentous hemagglutinin transporter;(source:Araport11) protein_coding		1.95462	0.0148383		0.640649	0.570303		1.93832	0.0528508		1.5112		UP	-	-	-		YES	YES	no	-
AT1G64160	Encodes a dirigent protein involved in the synthesis of (-)pinoresinol. Dirigent proteins impart stereoselectivity on the phenoxy radical coupling reaction yielding optically active lignans from two molecules of coniferyl alcohol. protein_coding DIRIGENT PROTEIN 5 (DIR5) (ATDIR5);DIRIGENT PROTEIN 5 (DIR5)		3.71103	0.0272185		2.58163	0.142955		-1.82508	0.595228		1.4892		UP	-	-	-		-	-	not reported	-
AT2G32360	Ubiquitin-like superfamily protein;(source:Araport11) protein_coding		4.56464	9.32e-07		-0.0355359	0.998915		-0.0686021	0.999977		1.48683		UP	-	-	-		-	-	not reported	-
AT5G33340	Encodes a protein with aspartic protease activity (also known as aspartate-type endopeptidase activity). Overexpression of the gene was shown to lead to salicylic acid (SA)-mediated disease resistance upon exposure to the pathogen Pseudomonas syringae. Moreover, overexpression of this gene led to the upregulation of two pathogenesis-related genes PR1 and PR2. This upregulation was no longer obser…		4.45345	5.22e-07		0.0166198	0.998915		-0.0164223	0.999977		1.48455		UP	-	-	-		YES	-	not reported	-
AT5G03270	lysine decarboxylase family protein;(source:Araport11) protein_coding LONELY GUY 6 (LOG6) LONELY GUY 6 (LOG6)		4.13922	0.000124455		0.328822	0.868771		-0.0184942	0.999977		1.48318		UP	-	-	-		-	-	not reported	-
AT4G21650	Subtilase family protein;(source:Araport11) protein_coding SUBTILASE 3.13 (SBT3.13) SUBTILASE 3.13 (SBT3.13)		4.30735	2.41e-05		0.241935	0.903924		-0.124095	0.999977		1.47506		UP	-	-	-		-	-	not reported	-
AT1G75360	transmembrane protein;(source:Araport11) protein_coding		3.92972	0.000390565		0.487523	0.774732		-0.0104758	0.999977		1.46892		UP	-	-	-		-	-	not reported	-
AT3G58780	One of two genes (SHP1 and SHP2) that are required for fruit dehiscence. The two genes control dehiscence zone differentiation and promote the lignification of adjacent cells. protein_coding SHATTERPROOF 1 (SHP1) SHATTERPROOF 1 (SHP1)		3.61944	1.53e-06		0.383171	0.412643		0.36496	0.694449		1.45586		UP	-	-	-		YES	YES	not detected	-
AT2G30670	NAD(P)-binding Rossmann-fold superfamily protein;(source:Araport11) protein_coding		3.58496	2.43e-06		0.757033	0.0656424		-0.0035102	0.999977		1.44616		UP	-	-	-		-	-	not reported	-
AT4G33720	CAP (Cysteine-rich secretory proteins, Antigen 5, and Pathogenesis-related 1 protein) superfamily protein;(source:Araport11) protein_coding (ATCAPE3) (ATCAPE3)		3.52812	0.00295751		0.821396	0.606722		-0.0154898	0.999977		1.44467		UP	-	-	-		-	-	not reported	-
AT3G44460	basic leucine zipper transcription factor (BZIP67), identical to basic leucine zipper transcription factor GI:18656053 from (Arabidopsis thaliana); identical to cDNA basic leucine zipper transcription factor (atbzip67 gene) GI:18656052. Located in the nucleus and expressed during seed maturation in the cotyledons. protein_coding (DPBF2) BASIC LEUCINE ZIPPER TRANSCRIPTION FACTOR 67 (AtbZIP67); (DP…		4.24593	1.21e-07		0.0556844	0.990937		-0.0321394	0.999977		1.42316		UP	-	-	-		-	-	not reported	-
AT4G18650	A maternally expressed imprinted gene in the endosperm. It's expression is positively regulated by ROS1. protein_coding DOG1-LIKE 4 (DOGL4) DOG1-LIKE 4 (DOGL4)		2.75785	0.00132584		0.262598	0.913769		1.23065	0.234678		1.41703		UP	-	-	-		-	-	not reported	-
ATCG00440	Encodes NADH dehydrogenase D3 subunit of the chloroplast NAD(P)H dehydrogenase complex protein_coding (NDHC) (NDHC)		3.63806	1.08e-05		0.17491	0.91499		0.413496	0.8247		1.40882		UP	-	-	-		-	-	not reported	-
AT4G27300	S-locus lectin protein kinase family protein;(source:Araport11) protein_coding		4.04977	6.01e-08		0.133199	0.818333		-0.0456514	0.999977		1.37911		UP	-	-	-		-	YES	no	-
AT5G50335	hypothetical protein;(source:Araport11) protein_coding		2.2767	0.0185201		0.428028	0.85373		1.42262	0.325205		1.37578		UP	-	-	-		YES	YES	YES	-
AT4G35725	transmembrane protein;(source:Araport11) protein_coding		4.12692	8.61e-05		-0.0570778	0.998915		-0.0111876	0.999977		1.35289		UP	-	-	-		-	-	not reported	-
AT1G67290	glyoxal oxidase-related protein;(source:Araport11) protein_coding GLYOXAL OXIDASE 1 (GLOX1) GLYOXAL OXIDASE 1 (GLOX1)		3.99497	1.78e-08		0.0629443	0.937065		-0.0313187	0.999977		1.3422		UP	-	-	-		-	-	not reported	-
AT5G22300	encodes a nitrilase isomer. The purified enzyme shows a strong substrate specificity for beta-cyano-L-alanine, a intermediate product of the cyanide detoxification pathway. The mRNA is cell-to-cell mobile. protein_coding NITRILASE 4 (NIT4) NITRILASE 4 (AtNIT4);NITRILASE 4 (NIT4)		3.30534	0.00679262		0.11869	0.998915		0.561559	0.999977		1.32853		UP	-	-	-		-	YES	no	-
AT5G40420	Encodes oleosin2, a protein found in oil bodies, involved in seed lipid accumulation. Suppression of OLEO1 (and OLEO2) resulted in an aberrant phenotype of embryo cells that contain unusually large oilbodies that are not normally observed in seeds. Changes in the size of oilbodies caused disruption of storage organelles, altering accumulation of lipids and proteins and causing delay in germinatio…		4.1427	1.37e-06		-0.182875	0.864654		-0.0185952	0.999977		1.31374		UP	-	-	-		YES	-	not reported	-
AT2G18690	transmembrane protein;(source:Araport11) protein_coding		1.69528	0.00470533		0.937378	0.101613		1.30619	0.0647584		1.31295		UP	-	-	-		-	YES	YES	-
AT1G64710	GroES-like zinc-binding alcohol dehydrogenase family protein;(source:Araport11) protein_coding		4.01118	0.00055473		-0.0898178	0.998915		-0.00259791	0.999977		1.30626		UP	-	-	-		-	-	not reported	-
AT4G14560	auxin (indole-3-acetic acid) induced gene (IAA1) encoding a short-lived nuclear-localized transcriptional regulator protein. The mRNA is cell-to-cell mobile. protein_coding INDOLE-3-ACETIC ACID INDUCIBLE 1 (IAA1) AUXIN RESISTANT 5 (AXR5);INDOLE-3-ACETIC ACID INDUCIBLE 1 (IAA1)		2.52191	4.2e-05		0.494228	0.286252		0.899115	0.0884407		1.30508		UP	-	-	-		-	-	not reported	-
AT1G52890	encodes a NAC transcription factor whose expression is induced by drought, high salt, and abscisic acid. This gene binds to ERD1 promoter in vitro. protein_coding NAC DOMAIN CONTAINING PROTEIN 19 (NAC019) NAC DOMAIN CONTAINING PROTEIN 19 (ANAC019);NAC DOMAIN CONTAINING PROTEIN 19 (NAC019); (ANAC19)		3.77345	2.23e-06		0.0820407	0.987349		0.0582689	0.999977		1.30459		UP	-	-	-		YES	YES	YES	-
AT1G71140	MATE transporter that can export the antibiotic norfloxacin. protein_coding PROTEIN DETOXIFICATION 14 (DTX14) PROTEIN DETOXIFICATION 14 (DTX14)		2.4145	0.00302199		0.501308	0.672347		0.973918	0.41635		1.29658		UP	-	-	-		-	-	not reported	-
AT3G26200	putative cytochrome P450 The mRNA is cell-to-cell mobile. protein_coding "CYTOCHROME P450, FAMILY 71, SUBFAMILY B, POLYPEPTIDE 22" (CYP71B22) "CYTOCHROME P450, FAMILY 71, SUBFAMILY B, POLYPEPTIDE 22" (CYP71B22)		3.78112	0.0181729		0.0879034	0.998915		-0.0229151	0.999977		1.28204		UP	-	-	-		-	YES	not detected	-
AT3G59060	Encodes a novel Myc-related bHLH transcription factor, which physically associated with APRR1/TOC1 and is a member of PIF3 transcription factor family. Involved in shade avoidance. Functions as negative regulator of PhyB. Protein levels are modulated by phytochrome B. protein_coding PHYTOCHROME INTERACTING FACTOR 3-LIKE 6 (PIL6) (BHLHB1);PHYTOCHROME-INTERACTING FACTOR 5 (PIF5);PHYTOCHROME INTERAC…		3.7047	4.91e-07		0.142423	0.864574		-0.0235864	0.999977		1.27451		UP	-	-	-		-	-	not reported	-
AT4G18970	GDSL-motif esterase/acyltransferase/lipase. Enzyme group with broad substrate specificity that may catalyze acyltransfer or hydrolase reactions with lipid and non-lipid substrates. protein_coding		3.83621	0.000170519		0.0186254	0.998933		-0.0327167	0.999977		1.27404		UP	-	-	-		-	-	not reported	-
AT2G28570	hypothetical protein;(source:Araport11) protein_coding		1.83129	0.0070909		0.969719	0.151706		1.01542	0.280427		1.27214		UP	-	-	-		-	YES	YES	-
AT4G34250	Encodes KCS16, a member of the 3-ketoacyl-CoA synthase family involved in the biosynthesis of VLCFA (very long chain fatty acids). protein_coding 3-KETOACYL-COA SYNTHASE 16 (KCS16) 3-KETOACYL-COA SYNTHASE 16 (KCS16)		3.97564	0.000255952		-0.143055	0.993298		-0.0397108	0.999977		1.26429		UP	-	-	-		-	-	not reported	-
AT2G30300	Major facilitator superfamily protein;(source:Araport11) protein_coding		3.32193	1.74e-05		0.470391	0.443071		-0.0109754	0.999977		1.26045		UP	-	-	-		-	-	not reported	-
AT4G23110	Encodes a protein that is expressed in nuclei of the central cell, endosperm, early embryo and seed coat. It is a phosphorylation target of protein kinase CK2. It also interacts with MSI1, one of the core members of the Polycomb Repressive Complex 2 (PRC2), a master epigenetic regulator. It is likely to play a role in seed development along with the FIS2-PRC2 complex. protein_coding EARLY FLOWERI…		3.66096	1.6e-05		0.118445	0.979187		-0.0230491	0.999977		1.25212		UP	-	-	-		YES	-	not reported	-
AT1G74890	Encodes a nuclear response regulator that acts as a negative regulator in cytokinin-mediated signal transduction. Transcript accumulates in leaves and roots in response to cytokinin treatment. protein_coding RESPONSE REGULATOR 15 (ARR15) RESPONSE REGULATOR 15 (ARR15)		3.73973	7.59e-06		0.00891957	0.9993		0.0023316	0.999977		1.25033		UP	-	-	-		-	-	not reported	-
AT4G24890	purple acid phosphatase 24;(source:Araport11) protein_coding PURPLE ACID PHOSPHATASE 24 (PAP24) PURPLE ACID PHOSPHATASE 24 (PAP24);ARABIDOPSIS THALIANA PURPLE ACID PHOSPHATASE 24 (ATPAP24)		3.53383	2.7e-07		0.224677	0.597813		-0.01119	0.999977		1.24911		UP	-	-	-		-	-	not reported	-
AT4G22620	SAUR-like auxin-responsive protein family;(source:Araport11) protein_coding SMALL AUXIN UPREGULATED RNA 34 (SAUR34) SMALL AUXIN UPREGULATED RNA 34 (SAUR34)		3.42449	8.07e-08		0.312243	0.221104		0.00277187	0.999977		1.2465		UP	-	-	-		-	-	not reported	-
AT2G30660	ATP-dependent caseinolytic (Clp) protease/crotonase family protein;(source:Araport11) protein_coding		2.17688	0.00687272		0.569406	0.625655		0.990687	0.435275		1.24566		UP	-	-	-		YES	YES	no	-
AT5G17780	alpha/beta-Hydrolases superfamily protein;(source:Araport11) protein_coding		2.98449	9.4e-06		0.584253	0.163827		0.165804	0.999977		1.24485		UP	-	-	-		-	YES	YES	-
AT4G37800	xyloglucan endotransglucosylase/hydrolase 7;(source:Araport11) protein_coding XYLOGLUCAN ENDOTRANSGLUCOSYLASE/HYDROLASE 7 (XTH7) XYLOGLUCAN ENDOTRANSGLUCOSYLASE/HYDROLASE 7 (XTH7)		3.03207	0.00196583		0.712131	0.560704		-0.0138065	0.999977		1.24346		UP	-	-	-		-	-	not reported	-
AT4G15680	Encodes a member of the CC-type glutaredoxin (ROXY) family. protein_coding (GRXS4) (ROXY13); (GRXS4)		3.0222	1.24e-05		0.73407	0.087258		-0.0300498	0.999977		1.24207		UP	-	-	-		-	-	not reported	-
AT2G19230	Leucine-rich repeat transmembrane protein kinase protein;(source:Araport11) protein_coding		3.72972	0.000224927		0.0138224	0.9993		-0.018304	0.999977		1.24174		UP	-	-	-		-	-	not reported	-
AT3G50480	Homolog of RPW8 protein_coding HOMOLOG OF RPW8 4 (HR4) HOMOLOG OF RPW8 4 (HR4)		2.02945	0.0170848		0.691935	0.563224		1.00331	0.508179		1.24156		UP	-	-	-		-	-	not reported	-
AT2G20520	fasciclin-like arabinogalactan-protein 6 (Fla6) protein_coding FASCICLIN-LIKE ARABINOGALACTAN 6 (FLA6) FASCICLIN-LIKE ARABINOGALACTAN 6 (FLA6)		1.76492	0.0443961		0.591902	0.687325		1.34826	0.313365		1.23503		UP	-	-	-		-	-	not reported	-
AT5G26620	hypothetical protein;(source:Araport11) protein_coding		3.70044	0.000170476		0.0178542	0.998933		-0.0156636	0.999977		1.23421		UP	-	-	-		-	-	not reported	-
AT3G28510	P-loop containing nucleoside triphosphate hydrolases superfamily protein;(source:Araport11) protein_coding		2.79248	0.000726422		0.183079	0.956746		0.719529	0.613097		1.2317		UP	-	-	-		-	-	not reported	-
AT3G23010	receptor like protein 36;(source:Araport11) protein_coding RECEPTOR LIKE PROTEIN 36 (RLP36) RECEPTOR LIKE PROTEIN 36 (RLP36);RECEPTOR LIKE PROTEIN 36 (AtRLP36)		3.77345	3.15e-06		-0.0762815	0.992603		-0.0110062	0.999977		1.22872		UP	-	-	-		-	-	not reported	-
AT1G76410	RING/U-box superfamily protein;(source:Araport11) protein_coding (ATL8) (ATL8)		1.7958	0.0112624		1.18885	0.0922807		0.699078	0.649247		1.22791		UP	-	-	-		-	YES	YES	-
AT4G01970	Encodes a a raffinose and high affinity stachyose synthase as well as a stachyose and Gol specific galactosylhydrolase enzyme activity.AtRS4 is a sequential multifunctional RafS and StaS as well as a high affinity StaS, accepting only Raf and Gol for Sta product formation. AtRS4 possesses a Sta and Gol specific galactosylhydrolase enzyme activity. protein_coding STACHYOSE SYNTHASE (STS) RAFFINOSE…		2.59182	0.00226524		0.95746	0.248278		0.127675	0.999977		1.22565		UP	-	-	-		-	-	not reported	-
AT2G18420	Encodes a Gibberellin-regulated GASA/GAST/Snakin family protein protein_coding		3.40368	1.13e-06		-0.220608	0.702021		0.470536	0.383663		1.21787		UP	-	-	-		-	-	not reported	-
AT4G35070	SBP (S-ribonuclease binding protein) family protein;(source:Araport11) protein_coding		2.47092	0.000669682		0.481805	0.572584		0.691356	0.529376		1.21469		UP	-	-	-		-	YES	no	-
AT3G62950	Encodes a member of the CC-type glutaredoxin (ROXY) family that has been shown to interact with the transcription factor TGA2 and suppress ORA59 promoter activity. protein_coding (GRXC11) (ROXY4); (GRXC11)		3.84653	9.42e-07		-0.172396	0.847182		-0.0384301	0.999977		1.2119		UP	-	-	-		-	-	not reported	-
AT3G20190	Leucine-rich repeat protein kinase family protein;(source:Araport11) protein_coding POLLEN RECEPTOR LIKE KINASE 4 (PRK4) POLLEN RECEPTOR LIKE KINASE 4 (PRK4)		3.48864	2.92e-07		0.0711316	0.96812		-0.0131562	0.999977		1.18221		UP	-	-	-		-	-	not reported	-
AT5G46360	Encodes AtKCO3, a member of the Arabidopsis thaliana K+ channel family of AtTPK/KCO proteins. AtKCO3 is targeted to the vacuolar membrane. Forms homomeric ion channels in vivo. protein_coding CA2+ ACTIVATED OUTWARD RECTIFYING K+ CHANNEL 3 (KCO3) CA2+ ACTIVATED OUTWARD RECTIFYING K+ CHANNEL 3 (KCO3);CA2+ ACTIVATED OUTWARD RECTIFYING K+ CHANNEL 3 (ATKCO3)		3.58496	8.24e-06		-0.0130754	0.998933		-0.0255707	0.999977		1.18211		UP	-	-	-		-	-	not reported	-
AT2G29310	NAD(P)-binding Rossmann-fold superfamily protein;(source:Araport11) protein_coding		3.36226	4.1e-08		0.171452	0.540192		-0.00607958	0.999977		1.17588		UP	-	-	-		-	-	not reported	-
AT1G29670	GDSL-motif esterase/acyltransferase/lipase. Enzyme group with broad substrate specificity that may catalyze acyltransfer or hydrolase reactions with lipid and non-lipid substrates. The mRNA is cell-to-cell mobile. protein_coding (GDSL1) (GDSL1)		3.01118	0.0245363		0.522791	0.890997		-0.00958041	0.999977		1.1748		UP	-	-	-		-	YES	no	-
AT5G15120	2-aminoethanethiol dioxygenase, putative (DUF1637);(source:Araport11) protein_coding PLANT CYSTEINE OXIDASE 1 (PCO1) PLANT CYSTEINE OXIDASE 1 (PCO1)		2.00596	0.00562259		0.477666	0.656988		1.03388	0.303185		1.1725		UP	-	-	-		-	-	not reported	-
AT3G28320	transmembrane protein;(source:Araport11) protein_coding		4.12396	5.99e-08		-0.514566	0.0620946		-0.103555	0.999977		1.16861		UP	-	-	-		-	-	not reported	-
AT1G74110	member of CYP78A protein_coding "CYTOCHROME P450, FAMILY 78, SUBFAMILY A, POLYPEPTIDE 10" (CYP78A10) "CYTOCHROME P450, FAMILY 78, SUBFAMILY A, POLYPEPTIDE 10" (CYP78A10)		3.56464	1.26e-07		-0.0574622	0.981748		-0.0140552	0.999977		1.16437		UP	-	-	-		-	-	not reported	-
AT3G15440	RING/U-box protein;(source:Araport11) protein_coding		2.40368	0.00599831		0.226963	0.953898		0.857924	0.629653		1.16285		UP	-	-	-		-	-	not reported	-
AT1G08100	Encodes a high-affinity nitrate transporter. protein_coding NITRATE TRANSPORTER 2.2 (NRT2.2) (ACH2); (NRT2;2AT);NITRATE TRANSPORTER 2.2 (NRT2.2);NITRATE TRANSPORTER 2.2 (ATNRT2.2)		3.37744	6.63e-05		0.109426	0.988153		-0.0106071	0.999977		1.15875		UP	-	-	-		-	-	not reported	-
AT1G49210	RING/U-box superfamily protein;(source:Araport11) protein_coding		2.19616	0.00030024		0.429512	0.488884		0.850002	0.180885		1.15856		UP	-	-	-		-	-	not reported	-
AT3G43630	The gene encodes nodulin-like3 whose transcript abundance was repressed under conditions of Fe-deficient growth. protein_coding		3.42065	9.08e-05		-0.0561775	0.998915		0.0882256	0.999977		1.1509		UP	-	-	-		-	-	not reported	-
AT2G15780	Cupredoxin superfamily protein;(source:Araport11) protein_coding		3.16993	7.85e-05		0.271616	0.829038		-0.0178931	0.999977		1.14122		UP	-	-	-		-	-	not reported	-
AT1G03320	hypothetical protein;(source:Araport11) protein_coding		3.45345	4.1e-08		-0.0236475	0.998915		-0.0122378	0.999977		1.13919		UP	-	-	-		-	-	not reported	-
AT3G55710	UDP-Glycosyltransferase superfamily protein;(source:Araport11) protein_coding		3.25125	0.00705474		0.120477	0.998915		0.0385284	0.999977		1.13675		UP	-	-	-		-	-	not reported	-
AT3G60140	Encodes a protein similar to beta-glucosidase and is a member of glycoside hydrolase family 1. Expression is induced after 24 hours of dark treatment, in senescing leaves and treatment with exogenous photosynthesis inhibitor. Induction of gene expression was suppressed in excised leaves supplied with sugar. The authors suggest that the gene's expression pattern is responding to the level of sugar…		1.84806	0.00946121		0.698345	0.41125		0.859701	0.465696		1.13537		UP	-	-	-		YES	YES	no	-
AT4G16260	Encodes a putative beta-1,3-endoglucanase that interacts with the 30C02 cyst nematode effector. May play a role in host defense. protein_coding		1.96068	0.00562777		1.01906	0.140942		0.426105	0.999977		1.13528		UP	-	-	-		-	-	not reported	-
AT4G00050	basic helix-loop-helix (bHLH) DNA-binding superfamily protein;(source:Araport11) protein_coding UNFERTILIZED EMBRYO SAC 10 (UNE10) (PIF8);UNFERTILIZED EMBRYO SAC 10 (UNE10)		3.2539	3.98e-06		0.154319	0.885964		-0.0112867	0.999977		1.13231		UP	-	-	-		YES	-	not reported	-
AT5G67060	Encodes a bHLH transcription factor that is involved in transmitting tract and stigma development and acts as a local modulator of auxin and cytokinin responses to control gynoecium development. HEC1 affects auxin transport by acting as a transcriptional regulator of PIN1 and PIN3. protein_coding HECATE 1 (HEC1) HECATE 1 (HEC1)		3.17563	3.22e-06		-0.00774857	0.998933		0.208499	0.999977		1.12546		UP	-	-	-		-	YES	YES	-
AT5G52050	MATE efflux family protein;(source:Araport11) protein_coding DETOXIFICATION EFFLUX CARRIER 50 (DTX50) (ATDTX50);DETOXIFICATION EFFLUX CARRIER 50 (DTX50)		2.88739	2.1e-06		0.438722	0.192884		0.0420038	0.999977		1.12271		UP	-	-	-		-	-	not reported	-
AT5G01180	Encodes a dipeptide transporter expressed in pollen and ovules during early seed development. GFP-tagged PTR5 localizes to the plasma membrane. protein_coding NRT1/ PTR FAMILY 8.2 (NPF8.2) (ATNPF8.2);ARABIDOPSIS THALIANA PEPTIDE TRANSPORTER 5 (ATPTR5);NRT1/ PTR FAMILY 8.2 (NPF8.2);PEPTIDE TRANSPORTER 5 (PTR5)		3.32273	1.14e-07		0.0505673	0.984051		-0.0062029	0.999977		1.12236		UP	-	-	-		YES	YES	YES	-
AT1G27040	Major facilitator superfamily protein;(source:Araport11) protein_coding NRT1/ PTR FAMILY 4.5 (NPF4.5) NRT1/ PTR FAMILY 4.5 (NPF4.5); (ATNPF4.5)		3.2539	2.23e-06		0.113709	0.931322		-0.00216829	0.999977		1.12181		UP	-	-	-		-	-	not reported	-
AT1G06080	Encodes a protein homologous to delta 9 acyl-lipid desaturases of cyanobacteria and acyl-CoA desaturases of yeast and mammals. expression down-regulated by cold temperature. It is involved in the desaturation of VLCFAs to make monounsaturated VLCFAs. protein_coding DELTA 9 DESATURASE 1 (ADS1) (ATADS1);DELTA 9 DESATURASE 1 (ADS1)		1.88215	0.00245869		0.341404	0.723745		1.1223	0.119798		1.11528		UP	-	-	-		YES	YES	YES	-
AT3G06490	putative transcription factor MYB108 (MYB108) mRNA, protein_coding MYB DOMAIN PROTEIN 108 (MYB108) MYB DOMAIN PROTEIN 108 (MYB108);BOTRYTIS-SUSCEPTIBLE1 (BOS1);MYB DOMAIN PROTEIN 108 (AtMYB108)		3.10093	2.85e-05		0.453955	0.464337		-0.221807	0.999977		1.11102		UP	-	-	-		-	-	not reported	-
AT4G22560	sulfated surface-like glycoprotein;(source:Araport11) protein_coding		3.24266	6.8e-06		0.0751215	0.990038		0.0127398	0.999977		1.11017		UP	-	-	-		YES	-	not reported	-
AT4G12360	Bifunctional inhibitor/lipid-transfer protein/seed storage 2S albumin superfamily protein;(source:Araport11) protein_coding		3.31468	5.26e-08		0.00679143	0.998933		-0.00796759	0.999977		1.1045		UP	-	-	-		-	-	not reported	-
AT2G41070	Transcription factor homologous to ABI5. Regulates AtEm1 expression by binding directly at the AtEm1 promoter. Located in the nucleus and expressed during seed maturation in the cotyledons and later in the whole embryo. protein_coding ENHANCED EM LEVEL (EEL) ENHANCED EM LEVEL (EEL); (ATBZIP12); (DPBF4)		2.15891	0.00131103		0.0308066	0.998915		1.11068	0.143546		1.10013		UP	-	-	-		-	-	not reported	-
AT1G60970	SNARE-like superfamily protein;(source:Araport11) protein_coding		2.95345	0.000518589		0.373261	0.785885		-0.0300135	0.999977		1.0989		UP	-	-	-		-	-	not reported	-
AT2G14230	transposable_element_gene;(source:Araport11);CACTA-like transposase family (Ptta/En/Spm), has a 2.0e-119 P-value blast match to At5g36655.1/81-333 CACTA-like transposase family (Ptta/En/Spm) (CACTA-element) (Arabidopsis thaliana);(source:TAIR10) transposable_element_gene		3.42275	8.72e-05		0.0242164	0.998915		-0.156588	0.999977		1.09679		UP	-	-	-		-	-	not reported	-
AT3G47480	Calcium-binding EF-hand family protein;(source:Araport11) protein_coding		2.35712	0.00443712		0.728574	0.462936		0.185022	0.999977		1.09024		UP	-	-	-		-	-	not reported	-
AT1G62030	Cysteine/Histidine-rich C1 domain family protein;(source:Araport11) protein_coding		2.88078	0.000209242		0.394767	0.674598		-0.0107713	0.999977		1.08826		UP	-	-	-		-	-	not reported	-
AT5G49170	hypothetical protein;(source:Araport11) protein_coding		2.04352	0.000872911		0.600879	0.303603		0.607603	0.511463		1.084		UP	-	-	-		-	-	not reported	-
AT2G25820	encodes a member of the DREB subfamily A-4 of ERF/AP2 transcription factor family. The protein contains one AP2 domain. There are 17 members in this subfamily including TINY. protein_coding ETHYLENE AND SALT INDUCIBLE 2 (ESE2) ETHYLENE AND SALT INDUCIBLE 2 (ESE2)		2.70723	2.95e-06		0.505587	0.114071		-0.00845187	0.999977		1.06812		UP	-	-	-		-	-	not reported	TF
AT1G18350	MAP kinase kinase7. Member of plant mitogen-activated protein kinase kinase group D. Negative regulator of polar auxin transport. Overexpression leads to activation of basal and systemic acquired resistance. protein_coding MAP KINASE KINASE 7 (MKK7) MAP KINASE KINASE 7 (MKK7);MAP KINASE KINASE7 (MKK7);BUSHY AND DWARF 1 (BUD1);MAP KINASE KINASE 7 (ATMKK7)		3.08496	5.8e-06		0.127873	0.926986		-0.0196465	0.999977		1.0644		UP	-	-	-		-	-	not reported	-
AT5G47740	Adenine nucleotide alpha hydrolases-like superfamily protein;(source:Araport11) protein_coding		1.30991	0.0189955		0.526594	0.46398		1.35543	0.0542677		1.06398		UP	-	-	-		-	YES	no	-
AT3G28155	hypothetical protein;(source:Araport11) protein_coding		3.08496	0.000412037		0.151289	0.981748		-0.0460182	0.999977		1.06341		UP	-	-	-		YES	-	not reported	-
AT1G78470	F-box/LRR protein;(source:Araport11) protein_coding		3.24593	2.91e-05		-0.0457129	0.998915		-0.0191577	0.999977		1.06035		UP	-	-	-		-	-	not reported	-
AT1G04800	glycine-rich protein;(source:Araport11) protein_coding		3.33621	0.0485936		-0.143112	0.998915		-0.0564762	0.999977		1.04554		UP	-	-	-		-	-	not reported	-
AT1G63560	---		3.5222	1.53e-06		0.0416344	0.998915		-0.430185	0.524342		1.04455		UP	-	-	-		-	-	not reported	-
AT1G23090	Encodes AST91 mRNA for sulfate transporter. protein_coding (SULTR3;3) (SULTR3;3);SULFATE TRANSPORTER 91 (AST91)		2.77583	2.11e-05		0.363728	0.515133		-0.0149382	0.999977		1.04154		UP	-	-	-		-	YES	YES	-
AT3G21860	SKP1-like 10;(source:Araport11) protein_coding SKP1-LIKE 10 (SK10) SKP1-LIKE 10 (SK10);SKP1-LIKE 10 (ASK10)		3.30735	7.86e-06		-0.0787552	0.989832		-0.10435	0.999977		1.04142		UP	-	-	-		-	-	not reported	-
AT2G26480	UDP-glucosyl transferase 76D1;(source:Araport11) protein_coding UDP-GLUCOSYL TRANSFERASE 76D1 (UGT76D1) UDP-GLUCOSYL TRANSFERASE 76D1 (UGT76D1)		2.49582	3.23e-05		0.270716	0.665238		0.342069	0.788804		1.0362		UP	-	-	-		-	-	not reported	-
AT4G10010	Protein kinase superfamily protein;(source:Araport11) protein_coding		3.1552	1.32e-07		-0.0339841	0.997863		-0.0194308	0.999977		1.03393		UP	-	-	-		-	-	not reported	-
AT1G59950	NAD(P)-linked oxidoreductase superfamily protein;(source:Araport11) protein_coding		3.07318	4.2e-06		0.062613	0.993359		-0.0360664	0.999977		1.03324		UP	-	-	-		-	-	not reported	-
AT5G14920	Encodes a GASA domain containing protein that regulates increases in plant growth through GA-induced and DELLA-dependent signal transduction and that can increase abiotic stress resistance by reducing ROS accumulation. protein_coding A-STIMULATED IN ARABIDOPSIS 14 (GASA14) A-STIMULATED IN ARABIDOPSIS 14 (GASA14)		1.19306	0.0247321		0.818913	0.140298		1.08624	0.11773		1.03274		UP	-	-	-		-	YES	YES	-
AT2G39030	Encodes a protein that acts as an ornithine N-delta-acetyltransferase, leading to the formation of N-delta-actetylornithine. This compound is likely used in plant defense and levels of it are increased in Arabidopsis plants in response to MeJA and ABA. The mRNA is cell-to-cell mobile. protein_coding N-ACETYLTRANSFERASE ACTIVITY 1 (NATA1) N-ACETYLTRANSFERASE ACTIVITY 1 (NATA1)		3.12396	0.0134794		0.00857053	0.999367		-0.0415673	0.999977		1.03032		UP	-	-	-		-	-	not reported	-
AT1G09530	Transcription factor interacting with photoreceptors phyA and phyB. Forms a ternary complex in vitro with G-box element of the promoters of LHY, CCA1. Acts as a negative regulator of phyB signalling. It degrades rapidly after irradiation of dark grown seedlings in a process controlled by phytochromes. Does not play a significant role in controlling light input and function of the circadian clockw…		1.54927	0.0198234		0.0746105	0.998915		1.46472	0.0848722		1.02953		UP	-	-	-		-	YES	YES	-
AT3G27660	Encodes oleosin4 (Plant Cell, 2006, 18:1961), a protein found in oil bodies, involved in seed lipid accumulation. Functions in freezing tolerance of seeds. Note: also referred to as OLE3 in Plant Journal 2008, 55:798. protein_coding OLEOSIN 4 (OLEO4) OLEOSIN 4 (OLEO4);OLEOSIN 3 (OLE3)		2.66546	7.73e-05		0.433774	0.486382		-0.0110478	0.999977		1.02939		UP	-	-	-		-	-	not reported	-
AT2G30680	callose synthase-like protein;(source:Araport11) protein_coding		3.16096	5.99e-08		-0.0774476	0.90175		0.00273559	0.999977		1.02875		UP	-	-	-		-	-	not reported	-
AT5G07480	KAR-UP oxidoreductase 1;(source:Araport11) protein_coding KAR-UP OXIDOREDUCTASE 1 (KUOX1) KAR-UP OXIDOREDUCTASE 1 (KUOX1)		3.29248	4.09e-05		-0.195597	0.906855		-0.0117176	0.999977		1.02839		UP	-	-	-		-	-	not reported	-
AT1G75830	Predicted to encode a PR (pathogenesis-related) protein. Belongs to the plant defensin (PDF) family with the following members: At1g75830/PDF1.1, At5g44420/PDF1.2a, At2g26020/PDF1.2b, At5g44430/PDF1.2c, At2g26010/PDF1.3, At1g19610/PDF1.4, At1g55010/PDF1.5, At2g02120/PDF2.1, At2g02100/PDF2.2, At2g02130/PDF2.3, At1g61070/PDF2.4, At5g63660/PDF2.5, At2g02140/PDF2.6, At5g38330/PDF3.1 and At4g30070/PDF…		3.40368	0.00266254		-0.109973	0.998915		-0.212968	0.999977		1.02691		UP	-	-	-		-	-	not reported	-
AT5G61740	ABC2 homolog 14;(source:Araport11) protein_coding ATP-BINDING CASSETTE A10 (ABCA10) ARABIDOPSIS THALIANA ABC2 HOMOLOG 14 (ATATH14);ATP-BINDING CASSETTE A10 (ABCA10);ABC2 HOMOLOG 14 (ATH14)		3.40368	1.55e-05		-0.314496	0.697908		-0.0141389	0.999977		1.02501		UP	-	-	-		-	YES	not detected	-
AT1G15600	transmembrane protein;(source:Araport11) protein_coding		2.87744	0.00570736		0.197175	0.985975		-0.00820546	0.999977		1.02214		UP	-	-	-		-	-	not reported	-
AT5G57340	ras guanine nucleotide exchange factor Q-like protein;(source:Araport11) protein_coding		1.31908	0.00674416		0.640542	0.193775		1.10475	0.0595649		1.02146		UP	-	-	-		-	-	not reported	-
AT2G20160	E3 ubiquitin ligase SCF complex subunit SKP1/ASK1 family protein;(source:Araport11) protein_coding MEIDOS (MEO) ARABIDOPSIS SKP1-LIKE 17 (ASK17);MEIDOS (MEO)		3.22972	0.00174505		-0.151388	0.9938		-0.0215199	0.999977		1.01894		UP	-	-	-		-	-	not reported	-
AT1G58330	transcription factor-like protein;(source:Araport11) protein_coding (ZW2) (ZW2)		2.95345	8.48e-06		0.109667	0.951697		-0.00998602	0.999977		1.01771		UP	-	-	-		-	-	not reported	-
AT1G52830	An extragenic dominant suppressor of the hy2 mutant phenotype. Also exhibits aspects of constitutive photomorphogenetic phenotype in the absence of hy2. Mutants have dominant leaf curling phenotype shortened hypocotyls and reduced apical hook. Induced by indole-3-acetic acid. protein_coding INDOLE-3-ACETIC ACID 6 (IAA6) SHORT HYPOCOTYL 1 (SHY1);INDOLE-3-ACETIC ACID 6 (IAA6)		3.45018	4.63e-07		-0.254845	0.55533		-0.142632	0.999977		1.01757		UP	-	-	-		-	-	not reported	-
AT1G75490	---		3.06095	3.84e-06		-0.0148148	0.998915		-0.00111502	0.999977		1.01501		UP	-	-	-		YES	YES	YES	-
AT5G26220	ChaC-like family protein;(source:Araport11) protein_coding GAMMA-GLUTAMYL CYCLOTRANSFERASE 2;1 (GGCT2;1) (ATGGCT2;1);GAMMA-GLUTAMYL CYCLOTRANSFERASE 2;1 (GGCT2;1)		3.1431	0.000640384		-0.0959676	0.998915		-0.00510566	0.999977		1.01401		UP	-	-	-		YES	YES	YES	-
AT3G62100	Encodes a member of the Aux/IAA family of proteins implicated in auxin signaling. IAA30 lacks the conserved degron (domain II) found in many family members. IAA30 transcripts are induced by auxin treatment and accumulate preferentially in the quiescent center cells of the root meristem. Overexpression of IAA30 leads to defects in gravitropism, root development, root meristem maintenance, and coty…		1.93384	0.00420635		0.11724	0.988153		0.986993	0.272854		1.01269		UP	-	-	-		-	-	not reported	-
AT3G04070	NAC domain containing protein 47;(source:Araport11) protein_coding NAC DOMAIN CONTAINING PROTEIN 47 (NAC047) NAC DOMAIN CONTAINING PROTEIN 47 (NAC047);SPEEDY HYPONASTIC GROWTH (SHYG);SPEEDY HYPONASTIC GROWTH (SHG);NAC DOMAIN CONTAINING PROTEIN 47 (anac047)		1.31563	0.0339233		0.886809	0.184601		0.834207	0.41635		1.01221		UP	-	-	-		YES	YES	no	-
AT1G60980	gibberellin 20-oxidase 4;(source:Araport11) protein_coding GIBBERELLIN 20-OXIDASE 4 (GA20OX4) GIBBERELLIN 20-OXIDASE 4 (GA20OX4);GIBBERELLIN 20-OXIDASE 4 (ATGA20OX4)		3.13339	5.2e-07		-0.0488169	0.993298		-0.0506723	0.999977		1.0113		UP	-	-	-		-	-	not reported	-
AT1G70830	MLP-like protein 28;(source:Araport11) protein_coding MLP-LIKE PROTEIN 28 (MLP28) MLP-LIKE PROTEIN 28 (MLP28)		3.30735	0.0110843		-0.102453	0.998915		-0.183394	0.999977		1.00717		UP	-	-	-		-	-	not reported	-
AT5G11160	adenine phosphoribosyltransferase 5;(source:Araport11) protein_coding ADENINE PHOSPHORIBOSYLTRANSFERASE 5 (APT5) ADENINE PHOSPHORIBOSYLTRANSFERASE 5 (APT5)		1.85316	0.00109433		0.355748	0.6299		0.791839	0.245053		1.00025		UP	-	-	-		-	-	not reported	-
AT1G01190	cytochrome P450, family 78, subfamily A, polypeptide 8;(source:Araport11) protein_coding "CYTOCHROME P450, FAMILY 78, SUBFAMILY A, POLYPEPTIDE 8" (CYP78A8) "CYTOCHROME P450, FAMILY 78, SUBFAMILY A, POLYPEPTIDE 8" (CYP78A8)		1.94307	0.0145182		1.01524	0.233743		0.0293821	0.999977		0.995895		UP	-	-	-		-	-	not reported	-
AT5G24860	encodes a small protein of 12.6 kDa that regulates flowering and is involved in gibberellin signalling pathway. It is expressed in apical meristems immediately after the photoperiodic induction of flowering. Genetic interactions with flowering time and floral organ identity genes suggest that this gene may be involved in modulating the competence to flower. There are two other genes similar to FP…		2.66096	8.36e-05		0.340739	0.647256		-0.0200551	0.999977		0.993883		UP	-	-	-		-	-	not reported	-
AT1G34540	member of CYP94D protein_coding "CYTOCHROME P450, FAMILY 94, SUBFAMILY D, POLYPEPTIDE 1" (CYP94D1) "CYTOCHROME P450, FAMILY 94, SUBFAMILY D, POLYPEPTIDE 1" (CYP94D1)		1.35055	0.049797		0.506189	0.646064		1.11567	0.274333		0.990802		UP	-	-	-		-	-	not reported	-
AT5G59990	CCT motif family protein;(source:Araport11) protein_coding		2.95345	4.36e-05		0.0263857	0.998915		-0.0129746	0.999977		0.988952		UP	-	-	-		YES	-	not reported	-
AT1G30100	Encodes 9-cis-epoxycarotenoid dioxygenase, a key enzyme in the biosynthesis of abscisic acid. The expression of this gene increases during the first 6h of imbibition. protein_coding NINE-CIS-EPOXYCAROTENOID DIOXYGENASE 5 (NCED5) NINE-CIS-EPOXYCAROTENOID DIOXYGENASE 5 (ATNCED5);NINE-CIS-EPOXYCAROTENOID DIOXYGENASE 5 (NCED5)		3.07893	0.000151827		-0.121508	0.984979		-0.00711514	0.999977		0.983434		UP	-	-	-		-	-	not reported	-
AT1G15990	Encodes a plasma membrane localized member of the cyclic nucleotide gated channel (CNGC) family that is essential for male reproductive fertility. protein_coding CYCLIC NUCLEOTIDE GATED CHANNEL 7 (CNGC7) CYCLIC NUCLEOTIDE GATED CHANNEL 7 (ATCNGC7);CYCLIC NUCLEOTIDE GATED CHANNEL 7 (CNGC7)		2.90368	2.87e-07		0.0531603	0.980931		-0.00701001	0.999977		0.983276		UP	-	-	-		-	-	not reported	-
AT5G20810	SAUR-like auxin-responsive protein family;(source:Araport11) protein_coding SMALL AUXIN UPREGULATED RNA 70 (SAUR70) SMALL AUXIN UPREGULATED RNA 70 (SAUR70)		2.34007	0.000406184		-0.0876084	0.9938		0.685118	0.425545		0.979195		UP	-	-	-		-	-	not reported	-
AT1G72920	Toll-Interleukin-Resistance (TIR) domain family protein;(source:Araport11) protein_coding		2.03185	0.0291545		0.283154	0.940107		0.611671	0.999977		0.975557		UP	-	-	-		-	-	not reported	-
AT4G25410	basic helix-loop-helix (bHLH) DNA-binding superfamily protein;(source:Araport11) protein_coding		1.93508	0.00439749		-0.0438357	0.998915		1.03117	0.247121		0.974138		UP	-	-	-		-	-	not reported	-
AT2G33520	cysteine-rich/transmembrane domain protein A;(source:Araport11) protein_coding CYSTEINE-RICH TRANSMEMBRANE MODULE 7 (ATHCYSTM7) CYSTEINE-RICH TRANSMEMBRANE MODULE 7 (ATHCYSTM7)		2.74271	0.0114586		0.164755	0.996257		0.00263235	0.999977		0.970034		UP	-	-	-		-	-	not reported	-
AT2G18340	late embryogenesis abundant domain-containing protein / LEA domain-containing protein;(source:Araport11) protein_coding		2.90368	1.42e-07		0.032602	0.997263		-0.0290934	0.999977		0.969062		UP	-	-	-		-	-	not reported	-
AT5G58820	Subtilisin-like serine endopeptidase family protein;(source:Araport11) protein_coding		3	5.27e-08		-0.0754124	0.887081		-0.0183945	0.999977		0.968731		UP	-	-	-		-	-	not reported	-
AT5G65410	Encodes ZFHD2, a member of the zinc finger homeodomain transcriptional factor family.Gain of function of ATHB25 (35S and UBQ10 proomoters) and double loss of function of ATHB25 and ATHB22 increases and decreases, respectively, seed longevity. This phenotype is maternal and related to seed coat alterations. Gain of function increases expression of GA3OX2 and GA4 and GA1 levels. protein_coding HOME…		2.90368	0.000461582		0.0028666	0.999445		-0.0106775	0.999977		0.965289		UP	-	-	-		-	-	not reported	-
AT1G75240	Encodes a zinc finger-homeodomain transcription factor ZHD5. Nuclear import and DNA binding of the ZHD5 transcription factor is modulated by a competitive peptide inhibitor MIF1 (AT1G74660). protein_coding HOMEOBOX PROTEIN 33 (HB33) HOMEOBOX PROTEIN 33 (AtHB33);ZINC-FINGER HOMEODOMAIN 5 (ZHD5);HOMEOBOX PROTEIN 33 (HB33)		2.79248	0.0313783		0.119184	0.998915		-0.0196478	0.999977		0.964006		UP	-	-	-		-	-	not reported	-
AT1G77210	AtSTP14 belongs to the family of sugar transport proteins (AtSTPs)in volved in monosaccharide transport. Heterologous expression in yeast revealed that AtSTP14 is the transporter specifc for galactose and does not transport other monosaccharides such as glucose or fructose. protein_coding SUGAR TRANSPORT PROTEIN 14 (STP14) SUGAR TRANSPORT PROTEIN 14 (AtSTP14);SUGAR TRANSPORT PROTEIN 14 (STP14)		2.7047	5.07e-06		0.157638	0.836814		-0.000494694	0.999977		0.953946		UP	-	-	-		YES	-	not reported	-
AT5G12330	A member of SHI gene family. Arabidopsis thaliana has ten members that encode proteins with a RING finger-like zinc finger motif. Despite being highly divergent in sequence, many of the SHI-related genes are partially redundant in function and synergistically promote gynoecium, stamen and leaf development in Arabidopsis. Expressed in lateral root primordia and induced by auxin. SWP1 is involved i…		1.44091	0.00481297		0.652457	0.199993		0.75641	0.269914		0.949925		UP	-	-	-		-	YES	YES	-
AT1G01310	CAP (Cysteine-rich secretory proteins, Antigen 5, and Pathogenesis-related 1 protein) superfamily protein;(source:Araport11) protein_coding		2.80735	0.00191038		0.0521869	0.998915		-0.01358	0.999977		0.948654		UP	-	-	-		-	-	not reported	-
AT1G64680	beta-carotene isomerase D27;(source:Araport11) protein_coding		2.66096	0.00592374		0.159664	0.992588		0.0209806	0.999977		0.947203		UP	-	-	-		-	-	not reported	-
ATCG00580	PSII cytochrome b559. There have been many speculations about the function of Cyt b559, but the most favored at present is that it plays a protective role by acting as an electron acceptor or electron donor under conditions when electron flow through PSII is not optimized. protein_coding PHOTOSYSTEM II REACTION CENTER PROTEIN E (PSBE) PHOTOSYSTEM II REACTION CENTER PROTEIN E (PSBE)		2.45345	9.05e-06		0.237459	0.637044		0.144834	0.999977		0.945246		UP	-	-	-		-	-	not reported	-
AT5G56970	It encodes a protein whose sequence is similar to cytokinin oxidase/dehydrogenase, which catalyzes the degradation of cytokinins. protein_coding CYTOKININ OXIDASE 3 (CKX3) (ATCKX3);CYTOKININ OXIDASE 3 (CKX3)		2.41872	7.67e-07		0.146694	0.709199		0.255021	0.575244		0.940144		UP	-	-	-		-	-	not reported	-
AT1G53060	Legume lectin family protein;(source:Araport11) protein_coding		2.86471	1.1e-05		-0.168884	0.863896		0.120055	0.999977		0.938626		UP	-	-	-		-	-	not reported	-
AT5G21120	ethylene-insensitive3-like2 (EIL2) protein_coding ETHYLENE-INSENSITIVE3-LIKE 2 (EIL2) ETHYLENE-INSENSITIVE3-LIKE 2 (EIL2)		2.49434	0.000327514		0.327149	0.732597		-0.0086294	0.999977		0.937621		UP	-	-	-		-	YES	YES	TF
AT3G03670	Peroxidase superfamily protein;(source:Araport11) protein_coding		1.79248	0.017926		1.00209	0.217515		-0.00985377	0.999977		0.928238		UP	-	-	-		YES	-	not reported	-
AT4G15710	cystatin-like protein;(source:Araport11) protein_coding		2.82193	1.3e-05		-0.0299282	0.998915		-0.0147252	0.999977		0.925758		UP	-	-	-		-	-	not reported	-
ATCG01040	Cytochrome C assembly protein;(source:Araport11) protein_coding (YCF5) (YCF5)		2.27216	0.00609957		0.119733	0.996257		0.372326	0.999977		0.921407		UP	-	-	-		-	-	not reported	-
AT3G22120	cell wall-plasma membrane linker protein homolog (CWLP) protein_coding CELL WALL-PLASMA MEMBRANE LINKER PROTEIN (CWLP) CELL WALL-PLASMA MEMBRANE LINKER PROTEIN (CWLP)		2.35176	8.54e-06		0.403051	0.233882		-0.00373998	0.999977		0.917024		UP	-	-	-		-	YES	YES	-
AT3G14620	putative cytochrome P450 The mRNA is cell-to-cell mobile. protein_coding "CYTOCHROME P450, FAMILY 72, SUBFAMILY A, POLYPEPTIDE 8" (CYP72A8) "CYTOCHROME P450, FAMILY 72, SUBFAMILY A, POLYPEPTIDE 8" (CYP72A8)		2.23461	0.00335621		-0.169298	0.968919		0.680968	0.678145		0.915426		UP	-	-	-		-	-	not reported	-
AT1G26240	Proline-rich extensin-like family protein;(source:Araport11) protein_coding		2.27216	0.00678908		0.882554	0.346527		-0.415395	0.999977		0.913106		UP	-	-	-		-	-	not reported	-
AT5G50130	NAD(P)-binding Rossmann-fold superfamily protein;(source:Araport11) protein_coding		2.21425	0.000958435		0.522224	0.479176		-0.0240071	0.999977		0.904156		UP	-	-	-		-	-	not reported	-
AT1G74880	Encodes subunit NDH-O of NAD(P)H:plastoquinone dehydrogenase complex (Ndh complex) present in the thylakoid membrane of chloroplasts. This subunit is thought to be required for Ndh complex assembly. protein_coding NADH DEHYDROGENASE-LIKE COMPLEX ) (NdhO) NADH DEHYDROGENASE-LIKE COMPLEX ) (NdhO);NAD(P)H:PLASTOQUINONE DEHYDROGENASE COMPLEX SUBUNIT O (NDH-O)		2.62016	1.23e-06		0.111803	0.870499		-0.0205281	0.999977		0.903811		UP	-	-	-		-	-	not reported	-
AT4G39480	member of CYP96A protein_coding "CYTOCHROME P450, FAMILY 96, SUBFAMILY A, POLYPEPTIDE 9" (CYP96A9) "CYTOCHROME P450, FAMILY 96, SUBFAMILY A, POLYPEPTIDE 9" (CYP96A9)		2.45345	3.94e-06		0.260236	0.510349		-0.0126695	0.999977		0.900337		UP	-	-	-		-	-	not reported	-
AT1G18520	Member of TETRASPANIN family protein_coding TETRASPANIN11 (TET11) TETRASPANIN11 (TET11)		2.58496	2.12e-07		0.10767	0.799946		-0.000634801	0.999977		0.897333		UP	-	-	-		YES	-	not reported	-
AT3G01660	S-adenosyl-L-methionine-dependent methyltransferases superfamily protein;(source:Araport11) protein_coding		2.79248	3.14e-06		-0.0954395	0.94265		-0.0115471	0.999977		0.895165		UP	-	-	-		-	-	not reported	-
AT1G06990	GDSL-motif esterase/acyltransferase/lipase. Enzyme group with broad substrate specificity that may catalyze acyltransfer or hydrolase reactions with lipid and non-lipid substrates. protein_coding		2.69508	1.53e-06		-0.00871453	0.998933		-0.00271152	0.999977		0.894553		UP	-	-	-		-	YES	no	-
AT3G02550	LOB domain-containing protein 41;(source:Araport11) protein_coding LOB DOMAIN-CONTAINING PROTEIN 41 (LBD41) LOB DOMAIN-CONTAINING PROTEIN 41 (LBD41)		1.15373	0.00916491		0.50517	0.296612		1.01122	0.0613009		0.890039		UP	-	-	-		-	-	not reported	-
AT4G35710	DUF241 domain protein, putative (DUF241);(source:Araport11) protein_coding		2.66096	0.000384787		0.0257855	0.998915		-0.0173866	0.999977		0.889788		UP	-	-	-		-	-	not reported	-
AT3G56380	response regulator 17 protein_coding RESPONSE REGULATOR 17 (RR17) RESPONSE REGULATOR 17 (ARR17);RESPONSE REGULATOR 17 (RR17)		2.3766	1.08e-05		0.33132	0.405732		-0.0440555	0.999977		0.887955		UP	-	-	-		-	-	not reported	-
AT1G74810	HCO3- transporter family;(source:Araport11) protein_coding REQUIRES HIGH BORON 5 (BOR5) REQUIRES HIGH BORON 5 (BOR5)		2.9601	2.81e-06		-0.296064	0.520046		-0.0133048	0.999977		0.883577		UP	-	-	-		-	-	not reported	-
AT1G04180	YUCCA 9;(source:Araport11) protein_coding YUCCA 9 (YUC9) YUCCA 9 (YUC9)		1.22356	0.0135187		0.397104	0.565277		1.02449	0.10201		0.881719		UP	-	-	-		-	-	not reported	-
ATCG00220	PSII low MW protein protein_coding PHOTOSYSTEM II REACTION CENTER PROTEIN M (PSBM) PHOTOSYSTEM II REACTION CENTER PROTEIN M (PSBM)		2.19272	0.00148994		0.473807	0.585638		-0.0214063	0.999977		0.881705		UP	-	-	-		-	-	not reported	-
AT2G24130	Leucine-rich receptor-like protein kinase family protein;(source:Araport11) protein_coding		2.29248	3.57e-05		0.121242	0.925055		0.224331	0.999977		0.879351		UP	-	-	-		-	-	not reported	-
AT3G62960	Encodes a member of the CC-type glutaredoxin (ROXY) family that has been shown to interact with the transcription factor TGA2. protein_coding (ROXY8) (ROXY8)		2.72972	2.63e-05		-0.0895893	0.982425		-0.00521944	0.999977		0.878302		UP	-	-	-		-	-	not reported	-
AT1G10060	encodes a mitochondrial branched-chain amino acid aminotransferase. Complements the yeast leu/iso-leu/val auxotrophy mutant. protein_coding BRANCHED-CHAIN AMINO ACID TRANSAMINASE 1 (BCAT-1) BRANCHED-CHAIN AMINO ACID TRANSAMINASE 1 (ATBCAT-1);BRANCHED-CHAIN AMINO ACID TRANSFERASE 1 (BCAT1);BRANCHED-CHAIN AMINO ACID TRANSAMINASE 1 (BCAT-1)		2.5	0.00336256		0.143897	0.988316		-0.00902468	0.999977		0.878291		UP	-	-	-		YES	YES	YES	-
AT5G09970	member of CYP78A protein_coding "CYTOCHROME P450, FAMILY 78, SUBFAMILY A, POLYPEPTIDE 7" (CYP78A7) "CYTOCHROME P450, FAMILY 78, SUBFAMILY A, POLYPEPTIDE 7" (CYP78A7)		2.70752	4.22e-05		-0.0369519	0.998915		-0.0381028	0.999977		0.877488		UP	-	-	-		YES	-	not reported	-
AT1G07680	transmembrane protein;(source:Araport11) protein_coding		2.69616	0.00595476		-0.0478786	0.998915		-0.0173327	0.999977		0.876982		UP	-	-	-		-	-	not reported	-
AT4G27670	Encodes Hsp21, a chloroplast located small heat shock protein. A structure model of Hsp21, obtained by homology modeling, single-particle electron microscopy, and lysine-specific chemical crosslinking, shows that the Hsp21 subunits are arranged in two hexameric discs, rotated by 25 degree in relation to each other. protein_coding HEAT SHOCK PROTEIN 21 (HSP21) HEAT SHOCK PROTEIN 21 (HSP21)		2.79248	4.63e-07		-0.148235	0.735952		-0.0182703	0.999977		0.875325		UP	-	-	-		-	-	not reported	-
AT5G13140	Pollen Ole e 1 allergen and extensin family protein;(source:Araport11) protein_coding		1.34444	0.00515906		0.329218	0.632627		0.932416	0.109653		0.868692		UP	-	-	-		-	-	not reported	-
AT4G28420	Tyrosine transaminase family protein;(source:Araport11) protein_coding		2.61852	1.02e-06		0.0150397	0.998915		-0.0299749	0.999977		0.867861		UP	-	-	-		-	-	not reported	-
AT3G60790	F-box family protein;(source:Araport11) protein_coding		2.45345	1.42e-05		0.142636	0.875108		0.000833445	0.999977		0.865638		UP	-	-	-		YES	-	not reported	-
AT2G24850	Encodes a tyrosine aminotransferase that is responsive to treatment with jasmonic acid. protein_coding TYROSINE AMINOTRANSFERASE 3 (TAT3) TYROSINE AMINOTRANSFERASE (TAT);TYROSINE AMINOTRANSFERASE 3 (TAT3)		2.58067	2.84e-05		0.0190839	0.998915		-0.00774961	0.999977		0.864002		UP	-	-	-		-	-	not reported	-
AT5G44580	transmembrane protein;(source:Araport11) protein_coding		2.48598	4.13e-06		0.112649	0.900799		-0.0100973	0.999977		0.862843		UP	-	-	-		YES	YES	YES	-
AT1G01460	Type I phosphatidylinositol-4-phosphate 5-kinase, subfamily A. protein_coding (PIPK11) (PIPK11); (ATPIPK11)		2.66096	0.0015122		-0.0503638	0.998915		-0.0227697	0.999977		0.86261		UP	-	-	-		-	-	not reported	-
AT1G19610	Predicted to encode a PR (pathogenesis-related) protein. Belongs to the plant defensin (PDF) family with the following members: At1g75830/PDF1.1, At5g44420/PDF1.2a, At2g26020/PDF1.2b, At5g44430/PDF1.2c, At2g26010/PDF1.3, At1g19610/PDF1.4, At1g55010/PDF1.5, At2g02120/PDF2.1, At2g02100/PDF2.2, At2g02130/PDF2.3, At1g61070/PDF2.4, At5g63660/PDF2.5, At2g02140/PDF2.6, At5g38330/PDF3.1 and At4g30070/PDF…		2.9693	0.00188875		-0.352467	0.870334		-0.031566	0.999977		0.861755		UP	-	-	-		-	-	not reported	-
AT3G21790	UDP-Glycosyltransferase superfamily protein;(source:Araport11) protein_coding		2.70893	0.000564403		-0.112457	0.992127		-0.0190533	0.999977		0.859139		UP	-	-	-		-	-	not reported	-
AT1G67100	LOB domain-containing protein 40;(source:Araport11) protein_coding LOB DOMAIN-CONTAINING PROTEIN 40 (LBD40) LOB DOMAIN-CONTAINING PROTEIN 40 (LBD40)		2.40368	0.000336625		-0.0128886	0.998933		0.179858	0.999977		0.856882		UP	-	-	-		-	-	not reported	-
AT1G73500	member of MAP Kinase Kinase family. Autophosphorylates and also phosphorylates MPK3 and MPK6. Independently involved in ethylene and calmalexin biosynthesis. Induces transcription of ACS2, ACS6, ERF1, ERF2, ERF5, ERF6, CYP79B2, CYP79B3, CYP71A13 and PAD3. protein_coding MAP KINASE KINASE 9 (MKK9) (ATMKK9);MAP KINASE KINASE 9 (MKK9)		1.06974	0.0476371		0.508649	0.487263		0.990324	0.188167		0.856236		UP	-	-	-		-	YES	YES	Other
AT3G46350	LRR receptor-like Serine/Threonine-kinase;(source:Araport11) protein_coding		2.58496	8.31e-07		0.0313077	0.998915		-0.0487735	0.999977		0.855832		UP	-	-	-		-	-	not reported	-
AT3G14450	RNA-binding protein, putative, contains Pfam profile: PF00076 RNA recognition motif. (a.k.a. RRM, RBD, or RNP domain) (2 copies). Contains PAM PABC binding domain. protein_coding CTC-INTERACTING DOMAIN 9 (CID9) CTC-INTERACTING DOMAIN 9 (CID9)		2.56464	4.97e-05		0.0114763	0.998933		-0.0113335	0.999977		0.854928		UP	-	-	-		-	YES	no	-
AT5G53490	thylakoid lumenal 17.4 kDa protein, chloroplast, identical to SP:P81760 Thylakoid lumenal 17.4 kDa protein, chloroplast precursor (P17.4) {Arabidopsis thaliana}. Putative pentapeptide protein. protein_coding THYLAKOID LUMENAL 17.4 KDA PROTEIN (TL17) THYLAKOID LUMENAL 17.4 KDA PROTEIN (TL17)		2.5222	0.00501847		-0.140569	0.9938		0.17933	0.999977		0.853653		UP	-	-	-		-	-	not reported	-
AT2G29440	Encodes glutathione transferase belonging to the tau class of GSTs. Naming convention according to Wagner et al. (2002). protein_coding GLUTATHIONE S-TRANSFERASE TAU 6 (GSTU6) GLUTATHIONE S-TRANSFERASE 24 (GST24);GLUTATHIONE S-TRANSFERASE TAU 6 (GSTU6);GLUTATHIONE S-TRANSFERASE TAU 6 (ATGSTU6)		1.29939	0.000948442		0.580567	0.0852361		0.67618	0.114911		0.852047		UP	-	-	-		-	YES	no	-
AT4G23780	hypothetical protein;(source:Araport11) protein_coding		2.5982	0.00101475		0.0855131	0.998915		-0.13783	0.999977		0.848627		UP	-	-	-		-	-	not reported	-
AT1G53690	Protein of unknown function that is homologous to At5g41010, which encodes a non-catalytic subunit common to nuclear DNA-dependent RNA polymerases II, IV and V; homologous to budding yeast RPB12. protein_coding		2.22972	0.0198234		0.402155	0.868167		-0.0921916	0.999977		0.84656		UP	-	-	-		YES	YES	YES	-
AT4G03330	member of SYP12 Gene Family protein_coding SYNTAXIN OF PLANTS 123 (SYP123) (ATSYP123);SYNTAXIN OF PLANTS 123 (SYP123)		1.03995	0.0194989		0.489856	0.348099		1.00137	0.0774134		0.843725		UP	-	-	-		-	-	not reported	-
AT1G75580	SAUR-like auxin-responsive protein family;(source:Araport11) protein_coding SMALL AUXIN UPREGULATED RNA 51 (SAUR51) SMALL AUXIN UPREGULATED RNA 51 (SAUR51)		1.23288	0.00184723		0.505692	0.165802		0.788921	0.0755191		0.842496		UP	-	-	-		-	-	not reported	-
AT1G69840	SPFH/Band 7/PHB domain-containing membrane-associated protein family;(source:Araport11) protein_coding HYPERSENSITIVE INDUCED REACTION 1 (ATHIR1) HYPERSENSITIVE INDUCED REACTION 1 (ATHIR1)		1.94481	0.000921502		0.332688	0.674276		0.248567	0.999977		0.842021		UP	-	-	-		-	-	not reported	-
AT2G29090	Encodes a protein with ABA 8'-hydroxylase activity, involved in ABA catabolism. Member of the CYP707A gene family. This gene predominantly accumulates in dry seeds and is up-regulated immediately following imbibition. CYP707A2 appears to play a major role in the rapid decrease in ABA levels during early seed imbibition. protein_coding "CYTOCHROME P450, FAMILY 707, SUBFAMILY A, POLYPEPTIDE 2" (CYP…		2.56464	8.1e-05		-0.0311096	0.998915		-0.00919005	0.999977		0.841447		UP	-	-	-		-	-	not reported	-
AT3G50440	Encodes a protein shown to have methyl jasmonate esterase activity in vitro. This protein does not act on methyl IAA, MeSA, MeGA4, or MEGA9 in vitro. protein_coding METHYL ESTERASE 10 (MES10) METHYL ESTERASE 10 (MES10);ARABIDOPSIS THALIANA METHYL ESTERASE 10 (ATMES10)		2.54373	0.0039656		-0.0274816	0.998933		-0.00937516	0.999977		0.835625		UP	-	-	-		-	-	not reported	-
AT4G38850	mRNA is rapidly induced by auxin and is very short-lived. Has been used as a reporter gene in studying auxin mutants. protein_coding SMALL AUXIN UPREGULATED 15 (SAUR15) SMALL AUXIN UPREGULATED 15 (SAUR15);ARABIDOPSIS THALIANA SMALL AUXIN UPREGULATED 15 (ATSAUR15);ARABIDOPSIS COLUMBIA SAUR GENE 1 (SAUR-AC1);SMALL AUXIN UP RNA 1 FROM ARABIDOPSIS THALIANA ECOTYPE COLUMBIA (SAUR_AC1)		2.58496	3.94e-06		-0.0316534	0.998915		-0.0470065	0.999977		0.835434		UP	-	-	-		YES	YES	no	-
AT5G17860	calcium exchanger 7;(source:Araport11) protein_coding CALCIUM EXCHANGER 7 (CAX7) (CCX1);CALCIUM EXCHANGER 7 (CAX7)		2.93703	0.000698929		0.0163878	0.998933		-0.459746	0.999977		0.831224		UP	-	-	-		-	-	not reported	-
AT5G05420	FKBP-like peptidyl-prolyl cis-trans isomerase family protein;(source:Araport11) protein_coding		2.51118	0.000850973		0.012435	0.9993		-0.032073	0.999977		0.830515		UP	-	-	-		-	-	not reported	-
AT5G04230	Member of Phenylalanine ammonialyase (PAL) gene family. Differs significantly from PAL1 and PAL2 and other sequenced plant PAL genes. Arabidopsis has four PALs: AT2G37040 (PAL1), AT3G53260 (PAL2), AT5G04230 (PAL3) and AT3G10340 (PAL4). protein_coding PHENYL ALANINE AMMONIA-LYASE 3 (PAL3) PHENYL ALANINE AMMONIA-LYASE 3 (PAL3)		2.34019	0.00730866		0.145683	0.992588		-0.0159834	0.999977		0.823297		UP	-	-	-		-	YES	YES	-
AT2G18360	alpha/beta-Hydrolases superfamily protein;(source:Araport11) protein_coding		1.41997	0.00535107		0.594074	0.261542		0.455441	0.708184		0.823162		UP	-	-	-		-	-	not reported	-
AT2G15060	transposable_element_gene;(source:Araport11);CACTA-like transposase family (Tnp1/En/Spm), has a 1.8e-63 P-value blast match to ref|NP_189784.1| TNP1-related protein (Arabidopsis thaliana) (CACTA-element);(source:TAIR10) transposable_element_gene		2.58496	7.73e-05		-0.114328	0.96669		-0.014119	0.999977		0.818838		UP	-	-	-		-	-	not reported	-
AT5G18600	Encodes a member of the CC-type glutaredoxin (ROXY) family that has been shown to interact with the transcription factor TGA2 and suppress ORA59 promoter activity. protein_coding (ROXY10) (ROXY10)		2.29248	0.0041031		0.145028	0.986957		0.0045629	0.999977		0.814024		UP	-	-	-		-	-	not reported	-
AT5G65140	Haloacid dehalogenase-like hydrolase (HAD) superfamily protein;(source:Araport11) protein_coding TREHALOSE-6-PHOSPHATE PHOSPHATASE J (TPPJ) TREHALOSE-6-PHOSPHATE PHOSPHATASE J (TPPJ)		1.77177	0.000665169		0.403657	0.464559		0.25525	0.999977		0.810227		UP	-	-	-		-	-	not reported	-
AT5G53660	Growth regulating factor encoding transcription activator. One of the nine members of a GRF gene family, containing nuclear targeting domain. Involved in leaf development and expressed in shoot and flower. protein_coding GROWTH-REGULATING FACTOR 7 (GRF7) GROWTH-REGULATING FACTOR 7 (AtGRF7);GROWTH-REGULATING FACTOR 7 (GRF7)		2.40368	0.000136339		0.0530097	0.998915		-0.0298038	0.999977		0.808961		UP	-	-	-		-	-	not reported	-
AT5G55620	hypothetical protein;(source:Araport11) protein_coding		2.36502	0.0035166		0.0806892	0.998915		-0.021652	0.999977		0.80802		UP	-	-	-		-	YES	YES	-
AT2G42440	Lateral organ boundaries (LOB) domain family protein;(source:Araport11) protein_coding ASYMMETRIC LEAVES 2-LIKE 15 (ASL15) ASYMMETRIC LEAVES 2-LIKE 15 (ASL15);LOB DOMAIN-CONTAINING PROTEIN 17 (LBD17)		1.74778	0.000232491		0.63649	0.0830994		0.0395877	0.999977		0.807953		UP	-	-	-		-	-	not reported	-
AT5G06870	Encodes a polygalacturonase inhibiting protein involved in plant defense response. PGIPs inhibit the activity of pectin degrading enzymes such as those produced by fungal pathogens. PGIP2 is induced by fungal infection and methyl jasmonate.Suppressed in the proton sensitive stop1-mutant, but the transcription level was recovered by transformation of STOP2. Knockout mutant showed severe damage in …		2.69616	0.000376099		-0.263823	0.855287		-0.00875889	0.999977		0.807859		UP	-	-	-		-	-	not reported	-
AT2G47950	myelin transcription factor-like protein;(source:Araport11) protein_coding		2.12016	0.000255952		0.30481	0.66654		-0.00539815	0.999977		0.806523		UP	-	-	-		-	-	not reported	-
AT5G03310	SAUR-like auxin-responsive protein family;(source:Araport11) protein_coding SMALL AUXIN UPREGULATED RNA 44 (SAUR44) SMALL AUXIN UPREGULATED RNA 44 (SAUR44)		0.927268	0.0424159		0.395719	0.546553		1.09129	0.0656277		0.80476		UP	-	-	-		-	YES	YES	-
AT5G45820	Encodes a CBL-interacting serine/threonine protein kinase comprised of an N-terminal kinase catalytic domain similar to SNF1/AMPK and a unique C-terminal regulatory domain. protein_coding CBL-INTERACTING PROTEIN KINASE 20 (CIPK20) PROTEIN KINASE 18 (PKS18);CBL-INTERACTING PROTEIN KINASE 20 (CIPK20);SNF1-RELATED PROTEIN KINASE 3.6 (SnRK3.6)		2.54373	0.00946121		-0.127732	0.998195		-0.00639297	0.999977		0.803202		UP	-	-	-		-	YES	no	-
AT2G15050	Predicted to encode a PR (pathogenesis-related) protein. Belongs to the lipid transfer protein (PR-14) family with the following members: At2g38540/LTP1, At2g38530/LTP2, At5g59320/LTP3, At5g59310/LTP4, At3g51600/LTP5, At3g08770/LTP6, At2g15050/LTP7, At2g18370/LTP8, At2g15325/LTP9, At5g01870/LTP10, At4g33355/LTP11, At3g51590/LTP12, At5g44265/LTP13, At5g62065/LTP14, At4g08530/LTP15. protein_coding …		2.29248	1.09e-05		0.117534	0.90175		-0.0174117	0.999977		0.797535		UP	-	-	-		-	-	not reported	-
AT1G57830	Toll-Interleukin-Resistance (TIR) domain family protein;(source:Araport11) protein_coding		2.37744	0.000133644		0.0168934	0.998915		-0.0121562	0.999977		0.79406		UP	-	-	-		-	-	not reported	-
AT1G64800	DNA binding / transcription factor;(source:Araport11) protein_coding		2.66096	0.000151856		-0.217894	0.867698		-0.065447	0.999977		0.792541		UP	-	-	-		-	-	not reported	-
AT4G22570	Encodes an adenine phosphoribosyltransferase (APT; EC 2.4.2.7), which is a constitutively expressed enzyme involved in the one-step salvage of adenine to AMP. APT3 has higher affinity for zeatin, isopentenyladenine and benzyladenine than APT1 but lower Vmax than APT1. protein_coding ADENINE PHOSPHORIBOSYL TRANSFERASE 3 (APT3) ADENINE PHOSPHORIBOSYL TRANSFERASE 3 (APT3)		1.15683	0.00153309		0.560534	0.0828772		0.659245	0.107468		0.792202		UP	-	-	-		-	-	not reported	-
AT5G07560	Lipid-binding oleosins, glycine-rich protein. protein_coding GLYCINE-RICH PROTEIN 20 (GRP20) GLYCINE-RICH PROTEIN 20 (GRP20); (ATGRP20)		2.56464	0.00235341		-0.185475	0.968081		-0.00347637	0.999977		0.791897		UP	-	-	-		-	-	not reported	-
ATCG00300	encodes PsbZ, which is a subunit of photosystem II. In Chlamydomonas, this protein has been shown to be essential in the interaction between PS II and the light harvesting complex II. protein_coding (YCF9) (YCF9)		1.95345	0.0272549		0.3694	0.873729		0.0522202	0.999977		0.791689		UP	-	-	-		-	-	not reported	-
AT5G11420	transmembrane protein, putative (Protein of unknown function, DUF642);(source:Araport11) protein_coding		2.2245	0.000184627		-0.0394157	0.998915		0.182869	0.999977		0.789319		UP	-	-	-		-	-	not reported	-
AT2G24370	kinase with adenine nucleotide alpha hydrolases-like domain-containing protein;(source:Araport11) protein_coding		2.16096	2.1e-06		0.224912	0.462163		-0.0212091	0.999977		0.788222		UP	-	-	-		YES	-	not reported	-
AT4G25200	AtHSP23.6-mito mRNA, nuclear gene encoding mitochondrial protein_coding MITOCHONDRION-LOCALIZED SMALL HEAT SHOCK PROTEIN 23.6 (HSP23.6-MITO) MITOCHONDRION-LOCALIZED SMALL HEAT SHOCK PROTEIN 23.6 (HSP23.6-MITO);MITOCHONDRION-LOCALIZED SMALL HEAT SHOCK PROTEIN 23.6 (ATHSP23.6-MITO)		2.79248	0.000139848		-0.0778294	0.997579		-0.355931	0.992735		0.78624		UP	-	-	-		-	-	not reported	-
AT1G30740	FAD-binding Berberine family protein;(source:Araport11) protein_coding (ATBBE12) (ATBBE12)		2.45345	0.000131536		-0.0797398	0.993298		-0.015943	0.999977		0.785921		UP	-	-	-		-	-	not reported	-
AT5G13320	Encodes an enzyme capable of conjugating amino acids to 4-substituted benzoates. 4-HBA (4-hydroxybenzoic acid) and pABA (4-aminobenzoate) may be targets of the enzyme in Arabidopsis, leading to the production of pABA-Glu, 4HBA-Glu, or other related compounds. This enzyme is involved in disease-resistance signaling. It is required for the accumulation of salicylic acid, activation of defense respo…		1.95345	0.00135426		0.411838	0.59295		-0.0184101	0.999977		0.782291		UP	-	-	-		-	-	not reported	-
AT1G79680	Encodes a twin-domain, kinase-GC signaling molecule that may function in biotic stress responses that is critically dependent on the second messenger cGMP. protein_coding WALL ASSOCIATED KINASE (WAK)-LIKE 10 (WAKL10) (ATWAKL10);WALL ASSOCIATED KINASE (WAK)-LIKE 10 (WAKL10)		2.6427	0.000518589		0.0517181	0.998915		-0.353157	0.999977		0.780421		UP	-	-	-		-	-	not reported	-
AT2G43500	Plant regulator RWP-RK family protein;(source:Araport11) protein_coding NIN-LIKE PROTEIN 8 (NLP8) NIN-LIKE PROTEIN 8 (NLP8)		1.26072	0.0398424		0.10679	0.993298		0.964767	0.293716		0.777426		UP	-	-	-		-	-	not reported	-
AT1G35310	MLP-like protein 168;(source:Araport11) protein_coding MLP-LIKE PROTEIN 168 (MLP168) MLP-LIKE PROTEIN 168 (MLP168)		2.48097	0.000966484		-0.176453	0.952826		-0.00162954	0.999977		0.767628		UP	-	-	-		-	-	not reported	-
AT4G16490	ARM repeat superfamily protein;(source:Araport11) protein_coding		0.901446	0.0190151		0.687101	0.0786473		0.709387	0.165387		0.765978		UP	-	-	-		-	YES	no	-
AT1G03170	A member of the FAF family proteins encoded by the FANTASTIC FOUR (FAF) genes: AT4G02810 (FAF1), AT1G03170 (FAF2), AT5G19260 (FAF3) and AT3G06020 (FAF4). FAFs have the potential to regulate shoot meristem size in Arabidopsis thaliana. FAFs can repress WUS, which ultimately leads to an arrest of meristem activity in FAF overexpressing lines. protein_coding FANTASTIC FOUR 2 (FAF2) FANTASTIC FOUR 2 …		2.16096	0.0449654		0.148953	0.998195		-0.0125502	0.999977		0.765789		UP	-	-	-		-	-	not reported	-
AT5G18340	---		2.26178	0.00304176		0.165007	0.971983		-0.136103	0.999977		0.763562		UP	-	-	-		-	-	not reported	-
AT1G49975	photosystem I reaction center subunit N;(source:Araport11) protein_coding		2.23697	0.000324563		0.0820684	0.993298		-0.0289389	0.999977		0.763365		UP	-	-	-		-	-	not reported	-
AT3G26220	cytochrome P450 monooxygenase protein_coding "CYTOCHROME P450, FAMILY 71, SUBFAMILY B, POLYPEPTIDE 3" (CYP71B3) "CYTOCHROME P450, FAMILY 71, SUBFAMILY B, POLYPEPTIDE 3" (CYP71B3)		2.2751	0.000284417		-0.124682	0.962567		0.133796	0.999977		0.761404		UP	-	-	-		-	-	not reported	-
AT1G21500	hypothetical protein;(source:Araport11) protein_coding		2.48864	0.0213647		-0.114497	0.998915		-0.0927505	0.999977		0.760464		UP	-	-	-		-	-	not reported	-
AT1G08810	putative transcription factor of the R2R3-MYB gene family. Transcript increases under conditions that promote stomatal opening (white and blue light, abi1-1 mutation) and decreases under conditions that trigger stomatal closure (ABA, desiccation, darkness), with the exception of elevated CO2. Expressed exclusively in guard cells of all tissues. It is required for light-induced opening of stomata.…		1.94268	0.0170794		0.356752	0.855292		-0.0193105	0.999977		0.76004		UP	-	-	-		-	-	not reported	-
AT1G49800	transmembrane protein;(source:Araport11) protein_coding		2.16096	4.59e-06		0.157678	0.741446		-0.040761	0.999977		0.759294		UP	-	-	-		YES	-	not reported	-
AT4G03290	EF hand calcium-binding protein family;(source:Araport11) protein_coding		2.29248	0.00569202		-0.0108217	0.9993		-0.0252767	0.999977		0.752128		UP	-	-	-		-	-	not reported	-
AT1G13540	hypothetical protein (DUF1262);(source:Araport11) protein_coding		0.944909	0.0231346		0.811255	0.0569906		0.486166	0.526525		0.747443		UP	-	-	-		-	-	not reported	-
AT2G24270	Encodes a protein with non-phosphorylating NADP-dependent glyceraldehyde-3-phosphate dehydrogenase activity. The activity of the enzyme was determined from leaf extracts; the enzyme has not been purified to confirm activity. protein_coding ALDEHYDE DEHYDROGENASE 11A3 (ALDH11A3) ALDEHYDE DEHYDROGENASE 11A3 (ALDH11A3)		1.93887	0.0157323		0.31385	0.886142		-0.021349	0.999977		0.743791		UP	-	-	-		YES	-	not reported	-
AT2G37770	Encodes an NADPH-dependent aldo-keto reductase that can act on a wide variety of substrates in vitro including saturated and unsaturated aldehydes, steroids, and sugars. GFP-tagged AKR4C9 localizes to the chloroplast where it may play a role in detoxifying reactive carbonyl compounds that threaten to impair the photosynthetic process. Transcript levels for this gene are up-regulated in response t…		1.93254	0.024599		0.168166	0.987358		0.129432	0.999977		0.743378		UP	-	-	-		-	-	not reported	-
AT1G32880	ARM repeat superfamily protein;(source:Araport11) protein_coding		2.29248	2.21e-05		-0.0558176	0.994691		-0.0148036	0.999977		0.74062		UP	-	-	-		-	-	not reported	-
AT2G19210	Leucine-rich repeat transmembrane protein kinase protein;(source:Araport11) protein_coding		2.41221	0.000197298		-0.183821	0.89915		-0.00672983	0.999977		0.740555		UP	-	-	-		-	-	not reported	-
AT5G22460	alpha/beta-Hydrolases superfamily protein;(source:Araport11) protein_coding		2	0.00980928		0.248627	0.925055		-0.0270074	0.999977		0.74054		UP	-	-	-		-	YES	YES	-
AT4G11650	osmotin-like protein protein_coding OSMOTIN 34 (OSM34) OSMOTIN 34 (ATOSM34);OSMOTIN 34 (OSM34)		2.1191	8.24e-05		-0.102362	0.955676		0.203249	0.999977		0.739997		UP	-	-	-		-	-	not reported	-
AT1G18400	Encodes the brassinosteroid signaling component BEE1 (BR-ENHANCED EXPRESSION 1). Positively modulates the shade avoidance syndrome in Arabidopsis seedlings. protein_coding BR ENHANCED EXPRESSION 1 (BEE1) BR ENHANCED EXPRESSION 1 (BEE1)		1.98261	6.81e-07		0.246841	0.221235		-0.0113611	0.999977		0.739365		UP	-	-	-		-	YES	no	-
AT2G31770	RING/U-box superfamily protein;(source:Araport11) protein_coding ARIADNE 9 (ARI9) ARABIDOPSIS ARIADNE 9 (ATARI9);ARIADNE 9 (ARI9)		2.35022	0.00355275		-0.124126	0.993568		-0.0116087	0.999977		0.738162		UP	-	-	-		-	-	not reported	-
AT5G04190	Encodes phytochrome kinase substrate 4, a phytochrome signaling component involved in phototropism. It is phosphorylated in a phot1-dependent manner in vitro. Phosphorylation is transient and regulated by a type 2- protein phosphatase. protein_coding PHYTOCHROME KINASE SUBSTRATE 4 (PKS4) PHYTOCHROME KINASE SUBSTRATE 4 (PKS4)		2.32193	0.0224203		-0.0884347	0.998915		-0.0216135	0.999977		0.737293		UP	-	-	-		-	-	not reported	-
AT3G23290	LIGHT-DEPENDENT SHORT HYPOCOTYLS-like protein (DUF640);(source:Araport11) protein_coding LIGHT SENSITIVE HYPOCOTYLS 4 (LSH4) LIGHT SENSITIVE HYPOCOTYLS 4 (LSH4)		2.16096	0.0143099		0.0551859	0.998915		-0.00927505	0.999977		0.735625		UP	-	-	-		-	-	not reported	-
AT2G41090	Encodes a cytoplasmic, calcium binding calmodulin variant. CML10 interacts with phosphomannomutase (PMM)in vivo and increases its activity thereby affecting ascorbic acid biosynthesis. Its expression is induced by oxidative and other stress. The mRNA is cell-to-cell mobile. protein_coding CALMODULIN LIKE 10 (CML10) CALMODULIN LIKE 10 (CML10)		1.69017	0.000224584		0.147865	0.864708		0.365849	0.610901		0.734629		UP	-	-	-		-	-	not reported	-
AT1G03880	Protein is tyrosine-phosphorylated and its phosphorylation state is modulated in response to ABA in Arabidopsis thaliana seeds. protein_coding CRUCIFERIN 2 (CRU2) CRUCIFERIN B (CRB);CRUCIFERIN 2 (CRU2)		2.16096	0.000284417		0.0679705	0.997263		-0.0253477	0.999977		0.734529		UP	-	-	-		-	-	not reported	-
AT2G34330	LOW protein: protein BOBBER-like protein;(source:Araport11) protein_coding		1.66848	5.18e-05		0.0827463	0.942272		0.451719	0.258649		0.734314		UP	-	-	-		-	-	not reported	-
AT1G30210	TCP family protein involved in heterochronic regulation of leaf differentiation. protein_coding TEOSINTE BRANCHED 1, CYCLOIDEA, AND PCF FAMILY 24 (TCP24) (ATTCP24);TEOSINTE BRANCHED 1, CYCLOIDEA, AND PCF FAMILY 24 (TCP24)		2.08496	0.00319362		0.115453	0.990636		-0.0202477	0.999977		0.726723		UP	-	-	-		-	-	not reported	-
AT3G62090	encodes a novel Myc-related bHLH transcription factor, which physically associated with APRR1/TOC1 and is a member of PIF3 transcription factor family. protein_coding PHYTOCHROME INTERACTING FACTOR 3-LIKE 2 (PIL2) PHYTOCHROME-INTERACTING FACTOR 6 (PIF6);PHYTOCHROME INTERACTING FACTOR 3-LIKE 2 (PIL2)		1.25441	0.00557364		0.0870763	0.984979		0.837633	0.133324		0.726372		UP	-	-	-		-	YES	no	-
AT3G53060	SKP1-like 6;(source:Araport11) protein_coding SKP1-LIKE 6 (SK6) SKP1-LIKE 6 (SK6);SKP1-LIKE 6 (ASK6)		2.28644	0.0188516		-0.00410813	0.999445		-0.114647	0.999977		0.722563		UP	-	-	-		-	-	not reported	-
AT2G46870	Member of the RAV family of DNA binding proteins. Contains B3 domain. Recognizes 5'-CACCTG-'3 motif. protein_coding NGATHA1 (NGA1) NGATHA1 (NGA1)		2	0.00994445		0.174961	0.974988		-0.0156386	0.999977		0.719774		UP	-	-	-		-	YES	no	-
AT5G13670	nodulin MtN21-like transporter family protein protein_coding USUALLY MULTIPLE ACIDS MOVE IN AND OUT TRANSPORTERS 15 (UMAMIT15) USUALLY MULTIPLE ACIDS MOVE IN AND OUT TRANSPORTERS 15 (UMAMIT15)		2.20752	0.00539115		-0.0344043	0.998915		-0.0155074	0.999977		0.719202		UP	-	-	-		-	-	not reported	-
AT1G30135	jasmonate-zim-domain protein 8;(source:Araport11) protein_coding JASMONATE-ZIM-DOMAIN PROTEIN 8 (JAZ8) JASMONATE-ZIM-DOMAIN PROTEIN 8 (JAZ8); (tify5a)		2	0.00335621		0.175457	0.951171		-0.0192313	0.999977		0.718742		UP	-	-	-		-	-	not reported	-
AT1G07440	NAD(P)-binding Rossmann-fold superfamily protein;(source:Araport11) protein_coding		2.0982	9.33e-06		0.05293	0.988153		-0.00534317	0.999977		0.715262		UP	-	-	-		YES	YES	YES	-
AT1G54870	ChlADR is an aldehyde reductase that catalyzes the reduction of the aldehyde carbonyl groups on saturated and alpha,beta-unsaturated aldehydes with more than 5 carbons in vitro. The N-terminal region of this protein directs GFP to the chloroplast where where ChlADR likely helps to maintain the photosynthetic process by detoxifying reactive carbonyls formed during lipid peroxidation. In addition, …		2.1427	0.000308874		0.00730773	0.9993		-0.00945421	0.999977		0.713518		UP	-	-	-		-	-	not reported	-
AT1G55920	Encodes a chloroplast/cytosol localized serine O-acetyltransferase involved in sulfur assimilation and cysteine biosynthesis. Expressed in the vascular system. The mRNA is cell-to-cell mobile. protein_coding SERINE ACETYLTRANSFERASE 2;1 (SERAT2;1) SERINE ACETYLTRANSFERASE 2;1 (ATSERAT2;1);SERINE ACETYLTRANSFERASE 5 (SAT5); (ATSAT1);SERINE ACETYLTRANSFERASE 2;1 (SERAT2;1);SERINE ACETYLTRANSFERASE …		1.15372	0.00089874		0.4635	0.122482		0.521617	0.185917		0.712947		UP	-	-	-		-	YES	YES	-
AT5G09660	encodes a microbody NAD-dependent malate dehydrogenase encodes an peroxisomal NAD-malate dehydrogenase that is involved in fatty acid beta-oxidation through providing NAD to the process of converting fatty acyl CoA to acetyl CoA. protein_coding PEROXISOMAL NAD-MALATE DEHYDROGENASE 2 (PMDH2) PEROXISOMAL NAD-MALATE DEHYDROGENASE 2 (PMDH2)		2.16096	0.00306458		0.0409429	0.998915		-0.0770252	0.999977		0.708294		UP	-	-	-		-	-	not reported	-
AT1G59740	Major facilitator superfamily protein;(source:Araport11) protein_coding NRT1/ PTR FAMILY 4.3 (NPF4.3) (ATNPF4.3);NRT1/ PTR FAMILY 4.3 (NPF4.3)		1.12049	0.00853779		0.648422	0.125421		0.349753	0.805856		0.706221		UP	-	-	-		YES	YES	YES	-
AT2G02380	Encodes glutathione transferase belonging to the zeta class of GSTs. Naming convention according to Wagner et al. (2002). protein_coding GLUTATHIONE S-TRANSFERASE (CLASS ZETA) 2 (GSTZ2) GLUTATHIONE S-TRANSFERASE (CLASS ZETA) 2 (ATGSTZ2);GLUTATHIONE S-TRANSFERASE (CLASS ZETA) 2 (GSTZ2)		1.07293	0.0143751		0.275146	0.7049		0.766289	0.189923		0.704787		UP	-	-	-		-	-	not reported	-
AT1G30660	nucleic acid binding protein;(source:Araport11) protein_coding		2.08852	0.0193078		0.0154671	0.9993		0.010153	0.999977		0.704712		UP	-	-	-		-	-	not reported	-
AT5G66700	Encodes a homeodomain protein. Member of HD-ZIP 1 family, most closely related to HB5. AtHB53 is auxin-inducible and its induction is inhibited by cytokinin, especially in roots therefore may be involved in root development. protein_coding HOMEOBOX 53 (HB53) ARABIDOPSIS THALIANA HOMEOBOX 53 (ATHB53);HOMEOBOX-8 (HB-8);HOMEOBOX 53 (HB53)		2.10082	0.00106905		0.0141425	0.998933		-0.0183508	0.999977		0.69887		UP	-	-	-		-	-	not reported	-
AT2G39920	HAD superfamily, subfamily IIIB acid phosphatase;(source:Araport11) protein_coding		2.42248	1.84e-06		-0.297644	0.323515		-0.0304705	0.999977		0.698122		UP	-	-	-		-	-	not reported	-
AT3G03620	MATE efflux family protein;(source:Araport11) protein_coding		2.08496	0.047236		0.0209695	0.9993		-0.0154176	0.999977		0.696838		UP	-	-	-		-	-	not reported	-
AT1G30560	Encodes a member of the phosphate starvation-induced glycerol-3-phosphate permease gene family: AT3G47420(G3Pp1), AT4G25220(G3Pp2), AT1G30560(G3Pp3), AT4G17550(G3Pp4) and AT2G13100(G3Pp5). protein_coding GLYCEROL-3-PHOSPHATE PERMEASE 3 (G3Pp3) GLYCEROL-3-PHOSPHATE PERMEASE 3 (AtG3Pp3);GLYCEROL-3-PHOSPHATE PERMEASE 3 (G3Pp3)		0.919032	0.024692		0.647959	0.127864		0.521488	0.454869		0.696159		UP	-	-	-		-	-	not reported	-
AT4G25580	CAP160 protein;(source:Araport11) protein_coding		2.16096	0.00195408		-0.0472597	0.998915		-0.0284531	0.999977		0.695084		UP	-	-	-		-	-	not reported	-
AT3G28310	hypothetical protein (DUF677);(source:Araport11) protein_coding		2.61441	6.63e-05		-0.507953	0.335303		-0.0225162	0.999977		0.694647		UP	-	-	-		-	-	not reported	-
AT1G07050	FITNESS encodes a protein with a single CCT domain and belongs to the CCT motif family genes (CMF). FITNESS acts upstream JUB1 thereby controlling H2O2 levels. FITNESS has a role in cellular redox homeostasis controlling H2O2 levels, due to changes in enzymes, metabolites and transcripts related to ROS detoxification. protein_coding FITNESS (FITNESS) FITNESS (FITNESS)		2.2047	0.00286207		-0.102225	0.996257		-0.0190279	0.999977		0.694481		UP	-	-	-		-	-	not reported	-
AT2G31100	alpha/beta-Hydrolases superfamily protein;(source:Araport11) protein_coding		2	0.00160927		0.0902971	0.99465		-0.00843721	0.999977		0.693953		UP	-	-	-		-	-	not reported	-
AT5G53550	YELLOW STRIPE like 3;(source:Araport11) protein_coding YELLOW STRIPE LIKE 3 (YSL3) YELLOW STRIPE LIKE 3 (ATYSL3);YELLOW STRIPE LIKE 3 (YSL3)		0.821213	0.0120358		0.47326	0.157058		0.785771	0.0525106		0.693415		UP	-	-	-		-	-	not reported	-
AT2G41690	member of Heat Stress Transcription Factor (Hsf) family protein_coding HEAT SHOCK TRANSCRIPTION FACTOR B3 (HSFB3) HEAT SHOCK TRANSCRIPTION FACTOR B3 (AT-HSFB3);HEAT SHOCK TRANSCRIPTION FACTOR B3 (HSFB3);HEAT SHOCK TRANSCRIPTION FACTOR B3 (HSFB3)		1.96142	1.51e-05		0.139385	0.818649		-0.0217415	0.999977		0.69302		UP	-	-	-		-	YES	no	-
AT1G07260	Encodes a uridine diphosphate-glycosyltransferase that acts on methyl salicylate (MeSA) to form MeSA glucosides in vitro and in vivo and facilitates negative regulation of the SAR response by modulating homeostasis of MeSA and SA. protein_coding UDP-GLUCOSYL TRANSFERASE 71C3 (UGT71C3) UDP-GLUCOSYL TRANSFERASE 71C3 (UGT71C3)		1.40611	0.00100277		0.38422	0.375178		0.282079	0.876476		0.690802		UP	-	-	-		-	-	not reported	-
AT3G21520	Encodes a protein is directly or indirectly involved in membrane fission during breakdown of the ER and the tonoplast during leaf senescence and in membrane fusion during vacuole biogenesis in roots. The mRNA is cell-to-cell mobile. protein_coding DUF679 DOMAIN MEMBRANE PROTEIN 1 (DMP1) ARABIDOPSIS THALIANA DUF679 DOMAIN MEMBRANE PROTEIN 1 (AtDMP1);DUF679 DOMAIN MEMBRANE PROTEIN 1 (DMP1)		2.10147	2.68e-05		0.00365437	0.9993		-0.0390893	0.999977		0.688678		UP	-	-	-		-	-	not reported	-
AT5G53990	UDP-Glycosyltransferase superfamily protein;(source:Araport11) protein_coding		0.930008	0.0358452		0.199377	0.855508		0.928697	0.113122		0.686027		UP	-	-	-		-	-	not reported	-
AT2G18120	A member of SHI gene family. Arabidopsis thaliana has ten members that encode proteins with a RING finger-like zinc finger motif. Despite being highly divergent in sequence, many of the SHI-related genes are partially redundant in function and synergistically promote gynoecium, stamen and leaf development in Arabidopsis. protein_coding SHI-RELATED SEQUENCE 4 (SRS4) SHI-RELATED SEQUENCE 4 (SRS4)		2	0.00205103		0.0561964	0.998915		-0.00688391	0.999977		0.683104		UP	-	-	-		-	-	not reported	-
AT1G09350	Predicted to encode a galactinol synthase protein_coding GALACTINOL SYNTHASE 3 (GolS3) GALACTINOL SYNTHASE 3 (GolS3);GALACTINOL SYNTHASE 3 (AtGolS3)		1.77293	0.000486169		0.296208	0.636977		-0.0214766	0.999977		0.682552		UP	-	-	-		-	-	not reported	-
AT2G43580	Chitinase family protein;(source:Araport11) protein_coding		1.97262	0.000249768		0.0714818	0.992603		0.00121131	0.999977		0.681771		UP	-	-	-		-	-	not reported	-
AT3G22910	ATPase E1-E2 type family protein / haloacid dehalogenase-like hydrolase family protein;(source:Araport11) protein_coding AUTO-INHIBITED CA2+ ATPASE 13 (ACA13)		1.89244	1.08e-05		0.259665	0.418572		-0.107072	0.999977		0.681677		UP	-	-	-		-	-	not reported	-
AT5G25340	Ubiquitin-like superfamily protein;(source:Araport11) protein_coding		2.07635	7.19e-06		-0.0173594	0.998915		-0.0230045	0.999977		0.678663		UP	-	-	-		-	-	not reported	-
AT3G25400	dCTP pyrophosphatase-like protein;(source:Araport11) protein_coding		1.00233	0.00393737		0.263406	0.560812		0.763961	0.0595047		0.676567		UP	-	-	-		-	-	not reported	-
AT1G75160	DUF620 family protein (DUF620);(source:Araport11) protein_coding BOUNDARY OF ROP DOMAIN9 (BDR9) BOUNDARY OF ROP DOMAIN9 (BDR9)		1.53487	0.00258257		0.452998	0.429237		0.0415224	0.999977		0.676465		UP	-	-	-		-	-	not reported	-
AT4G16000	hypothetical protein;(source:Araport11) protein_coding		2.06033	0.000516528		0.120465	0.965368		-0.154201	0.999977		0.675531		UP	-	-	-		-	-	not reported	-
AT5G53870	early nodulin-like protein 1;(source:Araport11) protein_coding EARLY NODULIN-LIKE PROTEIN 1 (ENODL1) (AtENODL1);EARLY NODULIN-LIKE PROTEIN 1 (ENODL1)		2	0.00892587		0.0394688	0.998915		-0.0140181	0.999977		0.67515		UP	-	-	-		-	-	not reported	-
AT5G56700	FBD / Leucine Rich Repeat domains containing protein;(source:Araport11) protein_coding		2	0.00929933		0.028123	0.998915		-0.0151342	0.999977		0.670996		UP	-	-	-		-	-	not reported	-
AT3G13270	transposable_element_gene;(source:Araport11);similar to unknown protein [Arabidopsis thaliana] (TAIR:AT2G14450.1);(source:TAIR10) transposable_element_gene		2.0669	1.1e-05		-0.0357829	0.998915		-0.0192414	0.999977		0.670627		UP	-	-	-		-	-	not reported	-
AT1G26270	Phosphatidylinositol 3- and 4-kinase family protein;(source:Araport11) protein_coding		0.767796	0.033359		0.423095	0.315692		0.818997	0.081688		0.669963		UP	-	-	-		-	YES	YES	-
AT3G19620	Glycosyl hydrolase family protein;(source:Araport11) protein_coding		2.16096	0.011869		-0.147751	0.992168		-0.0134105	0.999977		0.666601		UP	-	-	-		-	-	not reported	-
AT4G32280	indole-3-acetic acid inducible 29;(source:Araport11) protein_coding INDOLE-3-ACETIC ACID INDUCIBLE 29 (IAA29) INDOLE-3-ACETIC ACID INDUCIBLE 29 (IAA29)		2.1218	0.000102725		-0.131596	0.924182		0.00303738	0.999977		0.664413		UP	-	-	-		YES	YES	no	-
AT1G07150	member of MEKK subfamily protein_coding MITOGEN-ACTIVATED PROTEIN KINASE KINASE KINASE 13 (MAPKKK13) MITOGEN-ACTIVATED PROTEIN KINASE KINASE KINASE 13 (MAPKKK13)		1.16202	0.00100618		0.432184	0.167553		0.395918	0.412802		0.663375		UP	-	-	-		-	YES	YES	-
AT2G32270	A member of Zrt- and Irt-related protein (ZIP) family. transcript is induced in response to zinc deficiency in the root. also response to iron deficiency. protein_coding ZINC TRANSPORTER 3 PRECURSOR (ZIP3) ZINC TRANSPORTER 3 PRECURSOR (ZIP3)		1.18709	0.0271866		0.814694	0.150115		-0.0145261	0.999977		0.662421		UP	-	-	-		YES	-	not reported	-
ATCG00550	PSII component protein_coding PHOTOSYSTEM II REACTION CENTER PROTEIN J (PSBJ) PHOTOSYSTEM II REACTION CENTER PROTEIN J (PSBJ)		1.5	0.00272184		0.263329	0.75307		0.21558	0.999977		0.659636		UP	-	-	-		-	-	not reported	-
AT5G52810	SAR-DEFICIENT4 (SARD4) alias ORNITHINE CYCLODEAMINASE/m-CRYSTALLIN (ORNCD1) is involved in the biosynthesis of pipecolic acid. The reductase converts dehydropipecolic acid intermediates generated from L-Lysine by AGD2-LIKE DEFENSE RESPONSE PROTEIN1 (ALD1) to pipecolic acid (PMID:28330936). protein_coding SAR DEFICIENT 4 (SARD4) SAR DEFICIENT 4 (SARD4)		0.713209	0.0416133		0.661614	0.0701286		0.602261	0.229017		0.659028		UP	-	-	-		-	-	not reported	-
AT2G22950	Encodes a putative auto-regulated Ca2+-ATPase located in the plasma membrane involved in transporting Ca2+ outside developing pollen grains. This activity is important to support normal pollen development, particularly the progression to uninucleated microspores to bicellular pollen grains. protein_coding AUTO-REGULATED CA2+-ATPASE 7 (ACA7) AUTO-REGULATED CA2+-ATPASE 7 (ACA7)		1.87555	0.000179355		0.10241	0.953732		-0.00819675	0.999977		0.656589		UP	-	-	-		-	-	not reported	-
AT3G48650	pseudogene of pectinesterase;(source:Araport11) pseudogene		1.99245	0.00523414		0.00117893	0.999445		-0.0253511	0.999977		0.656091		UP	-	-	-		-	-	not reported	-
AT1G53930	Ubiquitin-like superfamily protein;(source:Araport11) protein_coding		1.90368	0.00644336		0.0847975	0.998915		-0.0222991	0.999977		0.655392		UP	-	-	-		-	-	not reported	-
AT2G30630	P-loop containing nucleoside triphosphate hydrolases superfamily protein;(source:Araport11) protein_coding		2	0.0017005		-0.0209416	0.998915		-0.0142079	0.999977		0.65495		UP	-	-	-		YES	-	not reported	-
AT3G50310	Encodes a member of MEKK subfamily. Target promoter of the male germline-specific transcription factor DUO1. Involved in osmotic stress response via regulation of MPK6 activity. It also plays an important role in regulating cell division and cell elongation in the primary root meristematic and elongation areas. Mutants show defects in root microtubule organization.It phosphorylates MPK18 and MKK3…		1.60932	4.68e-05		0.389835	0.162846		-0.037628	0.999977		0.653842		UP	-	-	-		-	YES	YES	-
AT3G01270	Pectate lyase family protein;(source:Araport11) protein_coding		1.95345	0.000507174		0.0310113	0.998915		-0.0267978	0.999977		0.652553		UP	-	-	-		-	-	not reported	-
AT5G09990	elicitor peptide 5 precursor;(source:Araport11) protein_coding ELICITOR PEPTIDE 5 PRECURSOR (PROPEP5) ELICITOR PEPTIDE 5 PRECURSOR (PROPEP5)		1.83493	0.00424042		0.129514	0.981748		-0.0136358	0.999977		0.650268		UP	-	-	-		-	-	not reported	-
AT1G15590	E3 ubiquitin-protein ligase;(source:Araport11) protein_coding		2	3.22e-06		-0.0366375	0.996257		-0.0132079	0.999977		0.650052		UP	-	-	-		-	-	not reported	-
AT4G11730	Cation transporter/ E1-E2 ATPase family protein;(source:Araport11) protein_coding		2	1.35e-07		-0.0387445	0.963066		-0.0121473	0.999977		0.649703		UP	-	-	-		-	-	not reported	-
AT3G28600	P-loop containing nucleoside triphosphate hydrolases superfamily protein;(source:Araport11) protein_coding		2.09984	0.00964195		-0.0640325	0.998915		-0.0869108	0.999977		0.649631		UP	-	-	-		-	-	not reported	-
ATCG00640	encodes a chloroplast ribosomal protein L33, a constituent of the large subunit of the ribosomal complex protein_coding RIBOSOMAL PROTEIN L33 (RPL33) RIBOSOMAL PROTEIN L33 (RPL33)		1.59029	0.0001741		0.169843	0.788346		0.187998	0.999977		0.649376		UP	-	-	-		-	-	not reported	-
AT1G48320	Encodes one of the two functional DHNA-CoA (1,4-dihydroxy-2-naphthoyl-CoA) thioesterases found in Arabidopsis. protein_coding DHNA-COA THIOESTERASE 1 (DHNAT1) DHNA-COA THIOESTERASE 1 (DHNAT1)		0.95218	0.00661243		0.315731	0.463185		0.675353	0.118049		0.647754		UP	-	-	-		-	YES	no	-
AT1G66840	Encodes a coiled-coil protein WEB2 (weak chloroplast movement under blue light 2, also named PMI2/plastid movement impaired 2). Involved in chloroplast avoidance movement under intermediate and high light intensities. WEB2, together with another coiled-coil protein WEB1 (AT2G26570), maintains the chloroplast photorelocation movement velocity. protein_coding PLASTID MOVEMENT IMPAIRED 2 (PMI2) WEAK…		2.19616	0.000169586		-0.249636	0.759516		-0.00496539	0.999977		0.647186		UP	-	-	-		-	-	not reported	-
AT4G26820	GrpE-like protein;(source:Araport11) protein_coding		1.82193	0.000388411		0.150868	0.903137		-0.0407384	0.999977		0.644019		UP	-	-	-		-	-	not reported	-
AT4G16146	cAMP-regulated phosphoprotein 19-related protein;(source:Araport11) protein_coding		1.57401	0.000662404		-0.00353653	0.9993		0.359046	0.712375		0.643173		UP	-	-	-		YES	YES	no	-
AT1G03390	HXXXD-type acyl-transferase family protein;(source:Araport11) protein_coding		2	0.00128508		-0.0396525	0.998915		-0.033326	0.999977		0.642341		UP	-	-	-		-	-	not reported	-
AT2G30040	member of MEKK subfamily protein_coding MITOGEN-ACTIVATED PROTEIN KINASE KINASE KINASE 14 (MAPKKK14) MITOGEN-ACTIVATED PROTEIN KINASE KINASE KINASE 14 (MAPKKK14)		1.69354	0.000680859		0.33128	0.572584		-0.0979354	0.999977		0.642296		UP	-	-	-		YES	-	not reported	-
AT3G22121	Natural antisense transcript overlaps with AT3G22120. The RNA is cell-to-cell mobile. antisense_long_noncoding_rna		1.98885	0.000194512		-0.0455894	0.998915		-0.0174441	0.999977		0.641938		UP	-	-	-		-	-	not reported	-
AT3G03800	member of SYP13 Gene Family protein_coding SYNTAXIN OF PLANTS 131 (SYP131) (ATSYP131);SYNTAXIN OF PLANTS 131 (SYP131)		1.72666	2.82e-06		0.224149	0.327453		-0.0285938	0.999977		0.640737		UP	-	-	-		-	-	not reported	-
AT2G39470	PsbP-like protein 2;(source:Araport11) protein_coding PHOTOSYNTHETIC NDH SUBCOMPLEX L 1 (PnsL1) PHOTOSYNTHETIC NDH SUBCOMPLEX L 1 (PnsL1);PSBP-LIKE PROTEIN 2 (PPL2)		2.08496	0.0017005		-0.151126	0.960617		-0.0172511	0.999977		0.638862		UP	-	-	-		-	-	not reported	-
AT5G46330	Encodes a leucine-rich repeat serine/threonine protein kinase that is expressed ubiquitously. FLS2 is involved in MAP kinase signalling relay involved in innate immunity. Essential in the perception of flagellin, a potent elicitor of the defense response. FLS2 is directed for degradation by the bacterial ubiquitin ligase AvrPtoB. The mRNA is cell-to-cell mobile. protein_coding FLAGELLIN-SENSITIVE…		1.76548	1.25e-05		0.155319	0.709199		-0.00666614	0.999977		0.638045		UP	-	-	-		YES	YES	YES	-
AT3G60780	hypothetical protein (DUF1442);(source:Araport11) protein_coding		2.08496	0.0135344		-0.1639	0.986957		-0.0152601	0.999977		0.635268		UP	-	-	-		-	-	not reported	-
AT5G53880	hypothetical protein;(source:Araport11) protein_coding		1.46535	0.024243		0.621614	0.462059		-0.183671	0.999977		0.63443		UP	-	-	-		-	-	not reported	-
AT2G32740	galactosyltransferase 13;(source:Araport11) protein_coding GALACTOSYLTRANSFERASE 13 (GT13) GALACTOSYLTRANSFERASE 13 (GT13);ARABIDOPSIS GALACTOSYLTRANSFERASE 13 (ATGT13)		1.5	0.000746685		0.41258	0.334214		-0.0141624	0.999977		0.632806		UP	-	-	-		-	-	not reported	-
AT4G28040	nodulin MtN21-like transporter family protein protein_coding USUALLY MULTIPLE ACIDS MOVE IN AND OUT TRANSPORTERS 33 (UMAMIT33) USUALLY MULTIPLE ACIDS MOVE IN AND OUT TRANSPORTERS 33 (UMAMIT33)		1.16883	0.0136496		-0.185395	0.883189		0.907865	0.137186		0.630434		UP	-	-	-		-	YES	YES	-
AT3G26930	Protein with RNI-like/FBD-like domain;(source:Araport11) protein_coding		1.90368	0.00799987		-0.0033301	0.999445		-0.016371	0.999977		0.627992		UP	-	-	-		-	-	not reported	-
AT1G24650	Leucine-rich repeat protein kinase family protein;(source:Araport11) protein_coding		1.79248	3.88e-05		0.100277	0.918578		-0.010949	0.999977		0.62727		UP	-	-	-		-	-	not reported	-
AT4G37990	Encodes an aromatic alcohol:NADP+ oxidoreductase whose mRNA levels are increased in response to treatment with a variety of phytopathogenic bacteria. Though similar to mannitol dehydrogenases, this enzyme does not have mannitol dehydrogenase activity. protein_coding ELICITOR-ACTIVATED GENE 3-2 (ELI3-2) ELICITOR-ACTIVATED GENE 3 (ELI3);ELICITOR-ACTIVATED GENE 3-2 (ELI3-2);CINNAMYL-ALCOHOL DEHYDROG…		1.90368	0.0464117		0.00153687	0.999445		-0.0246995	0.999977		0.626838		UP	-	-	-		-	-	not reported	-
AT5G13790	AGL15 (AGAMOUS-Like 15) is a member of the MADS domain family of regulatory factors. Although AGL15 is preferentially expressed during embryogenesis, AGL15 is also expressed in leaf primordia, shoot apical meristems and young floral buds, suggesting that AGL15 may play a role during post-germinative development. Transgenic plants that ectopically express AGL15 show delays in the transition to flo…		1.45731	7.21e-05		0.408512	0.120451		0.00813373	0.999977		0.624651		UP	-	-	-		-	-	not reported	-
AT5G61620	myb-like transcription factor family protein;(source:Araport11) protein_coding		1.83778	0.0144271		0.0727442	0.998915		-0.045789	0.999977		0.621579		UP	-	-	-		-	-	not reported	-
AT1G33030	O-methyltransferase family protein;(source:Araport11) protein_coding		1.43471	0.00033076		0.262828	0.547496		0.16678	0.999977		0.621439		UP	-	-	-		-	-	not reported	-
AT2G19190	Encodes a receptor-like protein kinase that is involved in early defense signaling. Expression of this gene is strongly induced during leaf senescence. It is a target of the transcription factor AtWRKY6. protein_coding FLG22-INDUCED RECEPTOR-LIKE KINASE 1 (FRK1) FLG22-INDUCED RECEPTOR-LIKE KINASE 1 (FRK1);SE- NESCENCE-INDUCED RECEPTOR-LIKE KINASE (SIRK)		1.07812	0.0357675		0.650935	0.261241		0.132813	0.999977		0.620623		UP	-	-	-		-	YES	no	-
AT3G60290	2-oxoglutarate (2OG) and Fe(II)-dependent oxygenase superfamily protein;(source:Araport11) protein_coding		1.37462	0.00285836		0.531657	0.242439		-0.0454349	0.999977		0.62028		UP	-	-	-		-	-	not reported	-
AT3G15500	Encodes an ATAF-like NAC-domain transcription factor that doesn't contain C-terminal sequences shared by CUC1, CUC2 and NAM. Note: this protein (AtNAC3) is not to be confused with the protein encoded by locus AT3G29035, which, on occasion, has also been referred to as AtNAC3. The mRNA is cell-to-cell mobile. protein_coding NAC DOMAIN CONTAINING PROTEIN 3 (NAC3) NAC DOMAIN CONTAINING PROTEIN 3 (AT…		1.68292	0.00576028		0.041365	0.998915		0.13263	0.999977		0.618972		UP	-	-	-		YES	YES	YES	-
AT5G61090	Polynucleotidyl transferase, ribonuclease H-like superfamily protein;(source:Araport11) protein_coding		1.79248	1.1e-05		0.07068	0.947531		-0.00905336	0.999977		0.618036		UP	-	-	-		-	-	not reported	-
AT3G17690	member of Cyclic nucleotide gated channel family protein_coding CYCLIC NUCLEOTIDE GATED CHANNEL 19 (CNGC19) CYCLIC NUCLEOTIDE GATED CHANNEL 19 (CNGC19);CYCLIC NUCLEOTIDE-GATED CHANNEL 19 (ATCNGC19)		1.48923	6.82e-05		0.386624	0.152621		-0.0323464	0.999977		0.614504		UP	-	-	-		-	-	not reported	-
AT1G74670	Gibberellin-regulated family protein;(source:Araport11) protein_coding GA-STIMULATED ARABIDOPSIS 6 (GASA6) GA-STIMULATED ARABIDOPSIS 6 (GASA6)		1.75154	0.0112997		0.243625	0.909274		-0.151881	0.999977		0.61443		UP	-	-	-		-	-	not reported	-
AT2G14380	transposable_element_gene;(source:Araport11);gypsy-like retrotransposon family, has a 1.6e-123 P-value blast match to GB:AAD19359 polyprotein (gypsy_Ty3-element) (Sorghum bicolor);(source:TAIR10) transposable_element_gene		1.79248	0.00487073		0.105039	0.992127		-0.0583056	0.999977		0.613071		UP	-	-	-		-	-	not reported	-
AT1G13420	Encodes a sulfotransferase. Unlike the related ST4A protein (At2g14920), in vitro experiments show that this enzyme does not act brassinosteroids. ST4B is expressed in the roots and transcript levels rise in response to cytokinin treatment. protein_coding SULFOTRANSFERASE 4B (ST4B) SULFOTRANSFERASE 4B (ST4B);ARABIDOPSIS THALIANA SULFOTRANSFERASE 4B (ATST4B)		2.00394	0.0193208		-0.363401	0.865742		0.19453	0.999977		0.611691		UP	-	-	-		-	-	not reported	-
AT3G45960	member of EXPANSIN-LIKE. Naming convention from the Expansin Working Group (Kende et al, 2004. Plant Mol Bio) protein_coding EXPANSIN-LIKE A3 (EXLA3) EXPANSIN-LIKE A3 (ATEXLA3); (EXPL3);EXPANSIN-LIKE A3 (EXLA3); (ATHEXP BETA 2.3); (ATEXPL3)		1.84301	3.12e-05		-0.0513196	0.991995		0.026982	0.999977		0.606223		UP	-	-	-		-	-	not reported	-
AT4G23130	Encodes a receptor-like protein kinase. Naming convention from Chen et al 2003 (PMID 14756307) protein_coding CYSTEINE-RICH RLK (RECEPTOR-LIKE PROTEIN KINASE) 5 (CRK5) RECEPTOR-LIKE PROTEIN KINASE 6 (RLK6);CYSTEINE-RICH RLK (RECEPTOR-LIKE PROTEIN KINASE) 5 (CRK5)		1.90368	0.00119511		-0.0722329	0.997721		-0.0166775	0.999977		0.604922		UP	-	-	-		-	-	not reported	-
AT1G28010	Encodes an ATP-binding cassette (ABC) transporter. Expressed in the vascular tissue of primary stem. protein_coding ATP-BINDING CASSETTE B14 (ABCB14) P-GLYCOPROTEIN 14 (PGP14);MULTI-DRUG RESISTANCE 12 (MDR12);ATP-BINDING CASSETTE B14 (ABCB14);ARABIDOPSIS THALIANA ATP-BINDING CASSETTE B14 (ATABCB14)		1.68819	0.00188804		0.161345	0.924182		-0.0349461	0.999977		0.604862		UP	-	-	-		-	-	not reported	-
AT2G18260	member of SYP11 Gene Family protein_coding SYNTAXIN OF PLANTS 112 (SYP112) (ATSYP112);SYNTAXIN OF PLANTS 112 (SYP112)		1.76178	2e-05		0.0740078	0.949402		-0.0246953	0.999977		0.603698		UP	-	-	-		-	-	not reported	-
AT4G38190	encodes a gene similar to cellulose synthase protein_coding CELLULOSE SYNTHASE LIKE D4 (CSLD4) ARABIDOPSIS THALIANA CELLULOSE SYNTHASE-LIKE D4 (ATCSLD4);CELLULOSE SYNTHASE LIKE D4 (CSLD4)		1.79248	0.00480002		0.0269269	0.998915		-0.0222955	0.999977		0.599038		UP	-	-	-		-	-	not reported	-
AT2G37280	Encodes an ATP-binding cassette (ABC) transporter. Expressed in the vascular tissue of primary stem. protein_coding ATP-BINDING CASSETTE G33 (ABCG33) PLEIOTROPIC DRUG RESISTANCE 5 (PDR5);ATP-BINDING CASSETTE G33 (ABCG33);PLEIOTROPIC DRUG RESISTANCE 5 (ATPDR5)		0.739023	0.040771		0.69551	0.0652582		0.35985	0.685316		0.598128		UP	-	-	-		-	-	not reported	-
AT2G30070	Encodes a high affinity potassium transporter. protein_coding POTASSIUM TRANSPORTER 1 (KT1) POTASSIUM TRANSPORTER 1 (ATKT1); (ATKT1P);POTASSIUM TRANSPORTER 1 (KT1);POTASSIUM UPTAKE TRANSPORTER 1 (KUP1); (ATKUP1)		0.831374	0.0164635		0.479216	0.187975		0.481528	0.363509		0.597373		UP	-	-	-		-	-	not reported	-
AT4G04330	Encodes a chloroplast thylakoid localized RbcX protein that acts as a chaperone in the folding of Rubisco. protein_coding HOMOLOGUE OF CYANOBACTERIAL RBCX 1 (RbcX1) HOMOLOGUE OF CYANOBACTERIAL RBCX 1 (RbcX1); (AtRbcX1)		1.90368	0.0010621		-0.0855447	0.992603		-0.0337833	0.999977		0.594783		UP	-	-	-		-	-	not reported	-
AT3G08810	Galactose oxidase/kelch repeat superfamily protein;(source:Araport11) protein_coding		1.79248	0.00521637		0.000999233	0.999445		-0.0128042	0.999977		0.593559		UP	-	-	-		-	-	not reported	-
AT5G52710	Copper transport protein family;(source:Araport11) protein_coding		1.26303	0.00213963		0.637838	0.087258		-0.122159	0.999977		0.592904		UP	-	-	-		-	-	not reported	-
AT1G51490	This locus encodes a myrosinase. Arabidopsis thaliana ecotype Col-0 contains a non-functional copy but some other (not all) ecotypes contain a functional copy (reference: PubMed ID 26907263). protein_coding BETA GLUCOSIDASE 36 (BGLU36) BETA GLUCOSIDASE 36 (BGLU36);BETA-THIOGLUCOSIDE GLUCOHYDROLASE 6 (TGG6)		1.66096	0.00354583		0.131499	0.965366		-0.0165484	0.999977		0.591971		UP	-	-	-		-	-	not reported	-
ATCG00420	Encodes NADH dehydrogenase subunit J. Its transcription is increased upon sulfur depletion. protein_coding NADH DEHYDROGENASE SUBUNIT J (NDHJ) NADH DEHYDROGENASE SUBUNIT J (NDHJ)		1.81871	0.00374188		-0.0525732	0.998915		0.00958714	0.999977		0.59191		UP	-	-	-		-	-	not reported	-
AT5G38750	asparaginyl-tRNA synthetase family;(source:Araport11) protein_coding		1.79248	0.0148542		-0.00564277	0.9993		-0.0112434	0.999977		0.591865		UP	-	-	-		YES	-	not reported	-
AT4G23990	encodes a protein similar to cellulose synthase protein_coding CELLULOSE SYNTHASE LIKE G3 (CSLG3) ARABIDOPSIS THALIANA CELLULOSE SYNTHASE-LIKE G3 (ATCSLG3);CELLULOSE SYNTHASE LIKE G3 (CSLG3)		1.70752	9e-05		0.0718438	0.975077		-0.00620986	0.999977		0.591051		UP	-	-	-		-	-	not reported	-
AT1G05020	ENTH/ANTH/VHS superfamily protein;(source:Araport11) protein_coding ANTH PROTEIN 180 (AP180) (PICALM6);ANTH PROTEIN 180 (AP180)		1.08695	0.018089		0.122251	0.957408		0.56327	0.478515		0.590823		UP	-	-	-		-	-	not reported	-
AT1G13910	Leucine-rich repeat (LRR) family protein;(source:Araport11) protein_coding		0.925501	0.00827215		0.4187	0.260476		0.424632	0.456917		0.589611		UP	-	-	-		-	-	not reported	-
AT4G13345	Serinc-domain containing serine and sphingolipid biosynthesis protein;(source:Araport11) protein_coding MATERNAL EFFECT EMBRYO ARREST 55 (MEE55) MATERNAL EFFECT EMBRYO ARREST 55 (MEE55)		1.14884	0.0106561		0.176779	0.879781		0.442171	0.651016		0.589264		UP	-	-	-		-	-	not reported	-
AT2G42860	hypothetical protein;(source:Araport11) protein_coding		1.77353	0.000182438		-0.00709343	0.9993		-0.00683171	0.999977		0.586534		UP	-	-	-		-	-	not reported	-
AT1G32350	alternative oxidase 1D;(source:Araport11) protein_coding ALTERNATIVE OXIDASE 1D (AOX1D) ALTERNATIVE OXIDASE 1D (AOX1D)		3.56464	0.0117147		0.0393227	0.998933		-1.84974	0.403483		0.584742		UP	-	-	-		YES	-	not reported	-
ATCG00430	Encodes a protein which was originally thought to be part of photosystem II but its wheat homolog was later shown to encode for subunit K of NADH dehydrogenase. protein_coding PHOTOSYSTEM II REACTION CENTER PROTEIN G (PSBG) PHOTOSYSTEM II REACTION CENTER PROTEIN G (PSBG); (NDHK)		1.79331	0.0149397		-0.0465573	0.998915		0.0010229	0.999977		0.582592		UP	-	-	-		-	-	not reported	-
AT5G52640	Encodes a cytosolic heat shock protein AtHSP90.1. AtHSP90.1 interacts with disease resistance signaling components SGT1b and RAR1 and is required for RPS2-mediated resistance. The mRNA is cell-to-cell mobile. protein_coding HEAT SHOCK PROTEIN 90.1 (HSP90.1) HEAT SHOCK PROTEIN 81-1 (HSP81-1); (ATHS83); (HSP81.1);HEAT SHOCK PROTEIN 83 (HSP83);HEAT SHOCK PROTEIN 90-1 (AtHsp90-1);HEAT SHOCK PROTEIN 9…		1.24522	0.00586471		0.589672	0.194382		-0.088816	0.999977		0.582026		UP	-	-	-		-	-	not reported	-
AT4G36000	Pathogenesis-related thaumatin superfamily protein;(source:Araport11) protein_coding		1.39068	0.00174173		0.314052	0.572584		0.0405682	0.999977		0.581767		UP	-	-	-		-	-	not reported	-
AT4G21750	Encodes a homeobox protein similar to GL2. It is expressed in both the apical and basal daughter cells of the zygote as well as their progeny. Expression is detected starting the two-celled stage of embryo development and is later restricted to the outermost, epidermal cell layer from its inception. Its promoter is highly modular with each region contributing to specific aspects of the gene's spa…		1.67584	0.0434375		0.0946189	0.998915		-0.0265369	0.999977		0.581307		UP	-	-	-		-	-	not reported	-
AT2G25190	PPPDE putative thiol peptidase family protein;(source:Araport11) protein_coding		0.690337	0.0189603		0.41465	0.181353		0.63698	0.0899476		0.580655		UP	-	-	-		-	YES	no	-
AT3G57040	response regulator ARR9, A two-component response regulator-like protein with a receiver domain with a conserved aspartate residue and a possible phosphorylation site and at the N-terminal half. Appears to interact with histidine kinase like genes ATHP3 and ATHP2 protein_coding RESPONSE REGULATOR 9 (ARR9) RESPONSE REGULATOR 4 (ATRR4);RESPONSE REGULATOR 9 (ARR9)		0.761295	0.00257871		0.436521	0.0583911		0.538435	0.0603739		0.57875		UP	-	-	-		-	-	not reported	-
AT1G69100	Eukaryotic aspartyl protease family protein;(source:Araport11) protein_coding		1.90368	0.00709709		-0.144602	0.982425		-0.0241509	0.999977		0.578308		UP	-	-	-		-	-	not reported	-
AT2G29040	Exostosin family protein;(source:Araport11) protein_coding		1.66893	0.00089874		0.0832296	0.986957		-0.0190362	0.999977		0.577709		UP	-	-	-		-	-	not reported	-
AT1G80530	Major facilitator superfamily protein;(source:Araport11) protein_coding		0.669989	0.0263915		0.496444	0.112885		0.565691	0.163269		0.577375		UP	-	-	-		-	-	not reported	-
AT4G39955	alpha/beta-Hydrolases superfamily protein;(source:Araport11) protein_coding		0.807063	0.00313612		0.406319	0.110878		0.516419	0.106708		0.5766		UP	-	-	-		-	-	not reported	-
AT5G18150	Methyltransferase-related protein;(source:Araport11) protein_coding		1.0215	0.0327584		0.565179	0.310516		0.139318	0.999977		0.575332		UP	-	-	-		-	-	not reported	-
AT5G06080	LOB domain-containing protein 33;(source:Araport11) protein_coding LOB DOMAIN-CONTAINING PROTEIN 33 (LBD33) LOB DOMAIN-CONTAINING PROTEIN 33 (LBD33)		1.48153	0.00251062		0.198816	0.848289		0.0415358	0.999977		0.573959		UP	-	-	-		-	-	not reported	-
AT1G33890	Avirulence induced gene (AIG1) family protein;(source:Araport11) protein_coding IMMUNE ASSOCIATED NUCLEOTIDE BINDING 3 (IAN3) IMMUNE ASSOCIATED NUCLEOTIDE BINDING 3 (IAN3)		1.71225	3.33e-06		0.0156213	0.998915		-0.0126953	0.999977		0.571725		UP	-	-	-		-	-	not reported	-
AT5G16080	carboxyesterase 17;(source:Araport11) protein_coding CARBOXYESTERASE 17 (CXE17) CARBOXYESTERASE 17 (CXE17);CARBOXYESTERASE 17 (AtCXE17)		1.33493	0.00106905		0.3894	0.332452		-0.00995294	0.999977		0.571457		UP	-	-	-		-	-	not reported	-
AT5G64770	Encodes a root meristem growth factor (RGF). Belongs to a family of functionally redundant homologous peptides that are secreted, tyrosine-sulfated, and expressed mainly in the stem cell area and the innermost layer of central columella cells. RGFs are required for maintenance of the root stem cell niche and transit amplifying cell proliferation. Members of this family include: At5g60810 (RGF1), …		2	0.000179355		-0.0549175	0.998163		-0.230739	0.999977		0.571448		UP	-	-	-		-	-	not reported	-
AT5G54130	Calcium-binding endonuclease/exonuclease/phosphatase family;(source:Araport11) protein_coding		1.14312	0.0105192		0.379542	0.521139		0.191522	0.999977		0.571396		UP	-	-	-		-	-	not reported	-
AT4G04040	Phosphofructokinase family protein;(source:Araport11) protein_coding MATERNAL EFFECT EMBRYO ARREST 51 (MEE51) MATERNAL EFFECT EMBRYO ARREST 51 (MEE51)		0.695891	0.0191988		0.419271	0.181301		0.596803	0.121597		0.570655		UP	-	-	-		-	-	not reported	-
AT3G23340	Member of CKL gene family (CKL-C group). protein_coding CASEIN KINASE I-LIKE 10 (ckl10) CASEIN KINASE I-LIKE 10 (ckl10)		1.06002	0.000439789		0.161719	0.675741		0.490182	0.115996		0.570641		UP	-	-	-		-	-	not reported	-
AT4G03890	transposable_element_gene;(source:Araport11);similar to unknown protein [Arabidopsis thaliana] (TAIR:AT2G23480.1);(source:TAIR10) transposable_element_gene		1.79248	0.00508516		-0.0986111	0.994541		0.0176657	0.999977		0.570512		UP	-	-	-		-	-	not reported	-
AT1G10010	Encodes a high affinity amino acid transporter that is probably responsible for import of organic nitrogen into developing seeds. One of eight gene family members that encode amino acid permeases. Most closely related to AAP1 (75%) identity. protein_coding AMINO ACID PERMEASE 8 (AAP8) (ATAAP8);AMINO ACID PERMEASE 8 (AAP8)		1.79248	0.00494272		-0.0757868	0.998915		-0.0066552	0.999977		0.570013		UP	-	-	-		-	-	not reported	-
AT2G41180	VQ motif-containing protein;(source:Araport11) protein_coding SIGMA FACTOR BINDING PROTEIN 2 (SIB2) SIGMA FACTOR BINDING PROTEIN 2 (SIB2)		0.939427	0.0151606		-0.144692	0.898471		0.914801	0.0584404		0.569845		UP	-	-	-		-	-	not reported	-
AT1G61160	retrotransposon gag;(source:Araport11) protein_coding		1.36848	0.00457986		-0.0828575	0.988316		0.422126	0.717481		0.56925		UP	-	-	-		-	-	not reported	-
AT3G09280	transmembrane protein;(source:Araport11) protein_coding		1.68363	0.000362726		0.0558128	0.996374		-0.0363313	0.999977		0.567704		UP	-	-	-		-	-	not reported	-
AT2G31160	LIGHT-DEPENDENT SHORT HYPOCOTYLS-like protein (DUF640);(source:Araport11) protein_coding LIGHT SENSITIVE HYPOCOTYLS 3 (LSH3) ORGAN BOUNDARY 1 (OBO1);LIGHT SENSITIVE HYPOCOTYLS 3 (LSH3)		1.32023	0.000769144		0.371964	0.320828		0.00606869	0.999977		0.566087		UP	-	-	-		-	YES	no	-
AT3G45270	transposable_element_gene;(source:Araport11);hAT-like transposase family (hobo/Ac/Tam3), has a 5.7e-58 P-value blast match to GB:AAD24567 transposase Tag2 (hAT-element) (Arabidopsis thaliana);(source:TAIR10) transposable_element_gene		1.5	0.00178762		0.206954	0.824164		-0.0107074	0.999977		0.565416		UP	-	-	-		-	-	not reported	-
AT4G24950	Encodes the plant KASH protein SINE4; SINE4 interacts with SUN1 and SUN2 and is localized at the nuclear envelope. protein_coding (SINE4) (SINE4)		1.79248	0.00508649		-0.0454137	0.998915		-0.0571887	0.999977		0.563293		UP	-	-	-		-	-	not reported	-
AT1G61550	S-locus lectin protein kinase family protein;(source:Araport11) protein_coding		1.39091	0.0299063		0.137591	0.983421		0.158645	0.999977		0.562382		UP	-	-	-		YES	-	not reported	-
AT3G45280	syntaxin of plants 72 (SYP72) protein_coding SYNTAXIN OF PLANTS 72 (SYP72) (ATSYP72);SYNTAXIN OF PLANTS 72 (SYP72)		1.43777	0.000427846		-0.0883814	0.955148		0.336655	0.629653		0.562014		UP	-	-	-		-	YES	YES	-
AT5G52000	Putative importin alpha isoform. When overexpressed can rescue the impa-4 decreased transformation susceptibility phenotype. Target promoter of the male germline-specific transcription factor DUO1. protein_coding IMPORTIN ALPHA ISOFORM 8 (IMPA-8) IMPORTIN ALPHA ISOFORM 8 (IMPA-8)		1.66096	0.00301413		0.0130897	0.998933		0.00921318	0.999977		0.561089		UP	-	-	-		-	-	not reported	-
AT3G52130	Bifunctional inhibitor/lipid-transfer protein/seed storage 2S albumin superfamily protein;(source:Araport11) protein_coding		1.79248	9.4e-06		-0.100701	0.870334		-0.0106803	0.999977		0.560367		UP	-	-	-		-	-	not reported	-
AT1G80140	Pectin lyase-like superfamily protein;(source:Araport11) protein_coding		1.71648	0.00430021		-0.0248651	0.998915		-0.0110783	0.999977		0.560179		UP	-	-	-		YES	-	not reported	-
AT5G65320	basic helix-loop-helix (bHLH) DNA-binding superfamily protein;(source:Araport11) protein_coding		1.46103	0.00089885		0.188331	0.810492		0.0292608	0.999977		0.559541		UP	-	-	-		-	YES	not detected	-
AT1G26410	FAD-binding Berberine family protein;(source:Araport11) protein_coding (ATBBE6) (ATBBE6)		2.74593	0.0205739		0.43424	0.906688		-1.50297	0.452403		0.559065		UP	-	-	-		-	-	not reported	-
AT2G46600	Calcium-binding EF-hand family protein;(source:Araport11) protein_coding		1.11816	0.0373676		-0.0340355	0.998915		0.586721	0.598703		0.556948		UP	-	-	-		-	-	not reported	-
AT4G18350	Encodes 9-<i>cis</i>-epoxycarotenoid dioxygenase, a key enzyme in the biosynthesis of abscisic acid. The expression of this gene declines during the first 12h of imbibition. protein_coding NINE-CIS-EPOXYCAROTENOID DIOXYGENASE 2 (NCED2) NINE-CIS-EPOXYCAROTENOID DIOXYGENASE 2 (ATNCED2);NINE-CIS-EPOXYCAROTENOID DIOXYGENASE 2 (NCED2)		2.05575	0.00905199		-0.38318	0.81453		-0.00188019	0.999977		0.556898		UP	-	-	-		YES	YES	not detected	-
AT4G38530	Encodes a putative phosphoinositide-specific phospholipase C. There are two genes called ATPLC1, one corresponding to AT4g38530 (this one) and one corresponding to AT5g58670. protein_coding PHOSPHOLIPASE C1 (PLC1) PHOSPHOINOSITIDE-SPECIFIC PHOSPHOLIPASE C ISOFORM 3 (PLC3); (ATPLC3);PHOSPHOLIPASE C1 (PLC1);PHOSPHOLIPASE C1 (ATPLC1)		1.38373	0.000122971		0.184626	0.650888		0.102074	0.999977		0.556809		UP	-	-	-		-	YES	not detected	-
AT1G34640	peptidase;(source:Araport11) protein_coding		1.60082	0.00616285		-0.0164836	0.998933		0.0841163	0.999977		0.55615		UP	-	-	-		-	-	not reported	-
AT4G35820	2-oxoglutarate (2OG) and Fe(II)-dependent oxygenase superfamily protein;(source:Araport11) protein_coding		1.79859	0.000172712		-0.118879	0.925055		-0.0126793	0.999977		0.555677		UP	-	-	-		-	-	not reported	-
AT1G27610	hypothetical protein;(source:Araport11) protein_coding		1.63877	0.0206913		0.0726917	0.998915		-0.0456671	0.999977		0.555264		UP	-	-	-		-	-	not reported	-
AT4G36490	SEC14-like 12;(source:Araport11) protein_coding SEC14-LIKE 12 (SFH12) SEC14-LIKE 12 (SFH12);SEC14-LIKE 12 (ATSFH12)		1.5	0.00114191		0.178095	0.847899		-0.0123303	0.999977		0.555255		UP	-	-	-		-	-	not reported	-
AT5G25400	Nucleotide-sugar transporter family protein;(source:Araport11) protein_coding		1.58496	5.28e-06		0.083199	0.867958		-0.0134642	0.999977		0.551566		UP	-	-	-		-	-	not reported	-
AT1G07160	Protein phosphatase 2C family protein;(source:Araport11) protein_coding		1.4805	9.6e-05		0.164937	0.727166		0.00779296	0.999977		0.551078		UP	-	-	-		-	-	not reported	-
AT4G17245	RING/U-box superfamily protein;(source:Araport11) protein_coding		1.57729	0.0112699		0.087774	0.997721		-0.0118796	0.999977		0.551061		UP	-	-	-		-	-	not reported	-
ATCG00270	PSII D2 protein protein_coding PHOTOSYSTEM II REACTION CENTER PROTEIN D (PSBD) PHOTOSYSTEM II REACTION CENTER PROTEIN D (PSBD)		1.65106	0.00108824		-0.0160288	0.998915		0.0101393	0.999977		0.54839		UP	-	-	-		-	-	not reported	-
AT3G19100	Encodes a protein kinase that positively regulates gibberellic acid (GA) signaling by inactivating the E3 ubiquitin ligase GARU. GARU mediates ubiquitin-dependent degradation of GID1s, which are GA receptors. protein_coding (TAGK2) (TAGK2)		1.03428	0.00456514		-0.104507	0.936264		0.711369	0.10351		0.547046		UP	-	-	-		YES	-	not reported	-
AT4G23610	Late embryogenesis abundant (LEA) hydroxyproline-rich glycoprotein family;(source:Araport11) protein_coding		1.58496	1.83e-05		0.102033	0.855508		-0.046117	0.999977		0.54696		UP	-	-	-		-	-	not reported	-
AT3G49260	IQ-domain 21;(source:Araport11) protein_coding IQ-DOMAIN 21 (iqd21) IQ-DOMAIN 21 (iqd21)		1.54638	0.00417928		0.109784	0.981522		-0.0161459	0.999977		0.546672		UP	-	-	-		-	-	not reported	-
AT3G53310	AP2/B3-like transcriptional factor family protein;(source:Araport11) protein_coding		1.66096	0.00280309		-0.0103729	0.998933		-0.0107915	0.999977		0.5466		UP	-	-	-		-	-	not reported	-
AT1G30160	hypothetical protein (DUF295);(source:Araport11) protein_coding		1.79248	0.00434908		-0.114783	0.986957		-0.0382322	0.999977		0.546489		UP	-	-	-		-	-	not reported	-
AT3G57760	Protein kinase superfamily protein;(source:Araport11) protein_coding (ZRK6) (ZRK6)		1.09598	0.00495418		0.392802	0.365919		0.150073	0.999977		0.546284		UP	-	-	-		-	-	not reported	-
AT1G21980	Type I phosphatidylinositol-4-phosphate 5-kinase. Preferentially phosphorylates PtdIns4P. Induced by water stress and abscisic acid in Arabidopsis thaliana. Expressed in procambial cells of leaves, flowers and roots. A N-terminal Membrane Occupation and Recognition Nexus (MORN)affects enzyme activity and distribution. protein_coding PHOSPHATIDYLINOSITOL-4-PHOSPHATE 5-KINASE 1 (PIP5K1) PHOSPHATIDY…		0.628695	0.0431193		0.55504	0.0880578		0.454173	0.353053		0.545969		UP	-	-	-		-	-	not reported	-
AT5G39850	Ribosomal protein S4;(source:Araport11) protein_coding		0.938488	0.00648291		0.426519	0.230453		0.271871	0.826421		0.545626		UP	-	-	-		-	-	not reported	-
AT2G10660	transposable_element_gene;(source:Araport11);gypsy-like retrotransposon family (Athila), has a 4.3e-277 P-value blast match to GB:CAA57397 Athila ORF 1 (Arabidopsis thaliana);(source:TAIR10) transposable_element_gene		1.74271	0.0361072		-0.0793754	0.998915		-0.0268883	0.999977		0.545483		UP	-	-	-		-	-	not reported	-
AT5G47810	phosphofructokinase 2;(source:Araport11) protein_coding PHOSPHOFRUCTOKINASE 2 (PFK2) PHOSPHOFRUCTOKINASE 2 (PFK2)		0.897188	0.00707486		0.219605	0.662993		0.512235	0.258593		0.543009		UP	-	-	-		-	-	not reported	-
AT4G18390	TEOSINTE BRANCHED 1, cycloidea and PCF transcription factor 2;(source:Araport11) protein_coding TEOSINTE BRANCHED 1, CYCLOIDEA AND PCF TRANSCRIPTION FACTOR 2 (TCP2) TEOSINTE BRANCHED 1, CYCLOIDEA AND PCF TRANSCRIPTION FACTOR 2 (TCP2)		1.58496	0.00443361		0.0522163	0.998915		-0.0154551	0.999977		0.540575		UP	-	-	-		-	-	not reported	-
ATCG00570	PSII cytochrome b559 protein_coding PHOTOSYSTEM II REACTION CENTER PROTEIN F (PSBF) PHOTOSYSTEM II REACTION CENTER PROTEIN F (PSBF)		1.5	0.0166173		0.148389	0.971361		-0.0273006	0.999977		0.540363		UP	-	-	-		-	-	not reported	-
AT5G50830	nuclear polyadenylated RNA-binding protein;(source:Araport11) protein_coding		1.66096	0.00318932		0.0230428	0.998915		-0.0629286	0.999977		0.540359		UP	-	-	-		-	-	not reported	-
AT4G12720	Encodes a protein with ADP-ribose hydrolase activity. Negatively regulates EDS1-conditioned plant defense and programmed cell death. protein_coding (NUDT7) (NUDT7);ARABIDOPSIS THALIANA NUDIX HYDROLASE HOMOLOG 7 (AtNUDT7);GROWTH FACTOR GENE 1 (GFG1)		1.01254	0.00393423		0.517123	0.12007		0.0746382	0.999977		0.534766		UP	-	-	-		-	-	not reported	-
AT2G18500	ovate family protein 7;(source:Araport11) protein_coding OVATE FAMILY PROTEIN 7 (OFP7) OVATE FAMILY PROTEIN 7 (OFP7);ARABIDOPSIS THALIANA OVATE FAMILY PROTEIN 7 (ATOFP7)		1.82749	0.000136339		-0.171411	0.824676		-0.0526046	0.999977		0.534493		UP	-	-	-		-	-	not reported	-
AT4G19380	Long-chain fatty alcohol dehydrogenase family protein;(source:Araport11) protein_coding		1.5	0.00132257		0.125129	0.934614		-0.0249698	0.999977		0.533386		UP	-	-	-		-	-	not reported	-
AT5G45530	transmembrane protein, putative (DUF594);(source:Araport11) protein_coding		1.5	0.00172284		0.143763	0.920431		-0.0498469	0.999977		0.531305		UP	-	-	-		-	-	not reported	-
AT2G16360	40S ribosomal protein S25;(source:Araport11) protein_coding		1.61441	0.0305859		-0.009421	0.9993		-0.0126486	0.999977		0.53078		UP	-	-	-		-	-	not reported	-
AT3G52080	encodes a cation:proton exchanger expressed in pollen protein_coding CATION/HYDROGEN EXCHANGER 28 (chx28) CATION/HYDROGEN EXCHANGER 28 (chx28)		1.79248	0.00530985		-0.186691	0.935556		-0.0134574	0.999977		0.530778		UP	-	-	-		-	-	not reported	-
AT4G31830	transmembrane protein;(source:Araport11) protein_coding		1.5	0.00158479		-0.0807364	0.987358		0.171871	0.999977		0.530378		UP	-	-	-		-	-	not reported	-
AT2G30170	Encodes a chloroplast PP2C phosphatase that is required for efficient dephosphorylation of PSII proteins and involved in light acclimation. protein_coding PHOTOSYSTEM II CORE PHOSPHATASE (PBCP) PHOTOSYSTEM II CORE PHOSPHATASE (PBCP)		1.32511	0.000418707		0.102541	0.920376		0.157319	0.999977		0.528324		UP	-	-	-		-	-	not reported	-
AT5G13220	Plants overexpressing At5g13220.3, but not At5g13220.1 showed enhanced insensitivity to MeJa. protein_coding JASMONATE-ZIM-DOMAIN PROTEIN 10 (JAZ10) JASMONATE-ZIM-DOMAIN PROTEIN 10 (JAZ10);JASMONATE-ASSOCIATED 1 (JAS1);TIFY DOMAIN PROTEIN 9 (TIFY9)		1.44226	0.00230566		0.212074	0.816356		-0.0718901	0.999977		0.527482		UP	-	-	-		-	-	not reported	-
AT3G43270	Plant invertase/pectin methylesterase inhibitor superfamily;(source:Araport11) protein_coding		0.986767	0.00214772		0.15084	0.796948		0.441019	0.289648		0.526209		UP	-	-	-		-	-	not reported	-
AT5G24510	60S acidic ribosomal protein family;(source:Araport11) protein_coding		1.86848	0.00620319		-0.267569	0.873265		-0.0237513	0.999977		0.525721		UP	-	-	-		-	-	not reported	-
AT1G21970	Transcriptional activator of genes required for both embryo maturation and cellular differentiation. Sequence is similar to HAP3 subunit of the CCAAT-box binding factor. HAP3 subunit is divided into three domains: an amino-terminal A domain, a central B domain, and a carboxyl-terminal C domain. LEC1 shared high similarity with other HAP3 homologs only in central, B domain. LEC1 is required for th…		1.5	0.00228669		0.0878579	0.985975		-0.0125214	0.999977		0.525112		UP	-	-	-		YES	YES	not detected	-
AT4G24660	homeobox protein 22;(source:Araport11) protein_coding HOMEOBOX PROTEIN 22 (HB22) HOMEOBOX PROTEIN 22 (ATHB22);ZINC FINGER HOMEODOMAIN 2 (ZHD2);HOMEOBOX PROTEIN 22 (HB22);MATERNAL EFFECT EMBRYO ARREST 68 (MEE68)		1.66096	0.0490921		-0.072972	0.998915		-0.0161099	0.999977		0.523961		UP	-	-	-		-	-	not reported	-
AT1G76210	DUF241 domain protein, putative (DUF241);(source:Araport11) protein_coding		1.25736	0.00592414		0.196132	0.84738		0.116535	0.999977		0.523341		UP	-	-	-		-	-	not reported	-
AT1G49100	Leucine-rich repeat protein kinase family protein;(source:Araport11) protein_coding		1.22209	0.000737419		0.276866	0.479188		0.0688021	0.999977		0.522587		UP	-	-	-		-	-	not reported	-
AT4G13480	Member of the R2R3 factor gene family. protein_coding MYB DOMAIN PROTEIN 79 (MYB79) MYB DOMAIN PROTEIN 79 (MYB79);MYB DOMAIN PROTEIN 79 (AtMYB79)		1.58496	0.00357799		0.0837351	0.993568		-0.103271	0.999977		0.521809		UP	-	-	-		-	-	not reported	-
AT1G50760	Aminotransferase-like, plant mobile domain family protein;(source:Araport11) protein_coding		1.58496	0.0120786		0.0887715	0.997863		-0.109072	0.999977		0.521554		UP	-	-	-		-	-	not reported	-
AT1G10550	Encodes a membrane-localized protein that is predicted to function during cell wall modification.Overexpression of XTH33 results in abnormal cell morphology. It's expression is under epigenetic control by ATX1. protein_coding XYLOGLUCAN:XYLOGLUCOSYL TRANSFERASE 33 (XTH33) XYLOGLUCAN:XYLOGLUCOSYL TRANSFERASE 33 (XTH33);XYLOGLUCAN:XYLOGLUCOSYL TRANSFERASE 33 (XET)		1.10313	0.0185141		0.492797	0.379961		-0.0315941	0.999977		0.521443		UP	-	-	-		-	-	not reported	-
AT2G19550	alpha/beta-Hydrolases superfamily protein;(source:Araport11) protein_coding		1.56464	0.00011096		0.00342063	0.9993		-0.00401644	0.999977		0.521349		UP	-	-	-		-	-	not reported	-
AT5G17700	MATE efflux family protein;(source:Araport11) protein_coding		1.87115	0.00082975		-0.307818	0.683148		-0.0015923	0.999977		0.520579		UP	-	-	-		-	YES	YES	-
AT5G38790	hypothetical protein;(source:Araport11) protein_coding		0.686027	0.0282224		0.396222	0.256146		0.479329	0.303329		0.520526		UP	-	-	-		-	-	not reported	-
AT5G08380	alpha-galactosidase 1;(source:Araport11) protein_coding ALPHA-GALACTOSIDASE 1 (AGAL1) ALPHA-GALACTOSIDASE 1 (AGAL1);ALPHA-GALACTOSIDASE 1 (AtAGAL1)		1.35152	0.000858803		-0.133756	0.886142		0.341831	0.651016		0.519864		UP	-	-	-		-	-	not reported	-
AT2G40880	Encodes a protein with cysteine proteinase inhibitor activity. Overexpression increases tolerance to abiotic stressors (i.e.salt,osmotic, cold stress). The mRNA is cell-to-cell mobile. protein_coding CYSTATIN A (CYSA) (FL3-27);CYSTATIN A (CYSA);CYSTATIN A (ATCYSA)		0.820808	0.00730458		0.204874	0.656112		0.529476	0.179956		0.518386		UP	-	-	-		-	-	not reported	-
AT4G38560	phospholipase-like protein (PEARLI 4) family protein;(source:Araport11) protein_coding		1.66096	0.00339286		-0.0962746	0.988153		-0.0130275	0.999977		0.517221		UP	-	-	-		-	YES	not detected	-
AT1G60060	Serine/threonine-protein kinase WNK (With No Lysine)-like protein;(source:Araport11) protein_coding		1.74593	0.000497299		-0.178813	0.855183		-0.0178676	0.999977		0.516415		UP	-	-	-		-	-	not reported	-
AT3G59010	Encodes PME35, a pectin methylesterase. PME35-mediated demethylesterification of the primary cell wall regulates the mechanical strength of the supporting tissue. protein_coding PECTIN METHYLESTERASE 61 (PME61) PECTIN METHYLESTERASE 35 (PME35);PECTIN METHYLESTERASE 61 (PME61)		1.58496	2.33e-06		-0.0155874	0.998915		-0.02204	0.999977		0.515778		UP	-	-	-		-	-	not reported	-
AT4G28640	Auxin induced gene, IAA11 (IAA11). Check the Comments field on the locus page to view updated sequence annotation. protein_coding INDOLE-3-ACETIC ACID INDUCIBLE 11 (IAA11) INDOLE-3-ACETIC ACID INDUCIBLE 11 (IAA11)		1.1029	0.00361206		0.127133	0.906688		0.313168	0.752454		0.514399		UP	-	-	-		-	-	not reported	-
ATMG00640	encodes a plant b subunit of mitochondrial ATP synthase based on structural similarity and the presence in the F(0) complex. protein_coding (ORF25) (ORF25)		1.09254	0.00242289		0.154294	0.830654		0.295702	0.738983		0.514178		UP	-	-	-		-	-	not reported	-
AT2G30830	encodes a protein whose sequence is similar to 2-oxoglutarate-dependent dioxygenase protein_coding		1.58496	0.00564124		-0.0461657	0.998915		-0.00308345	0.999977		0.511904		UP	-	-	-		-	-	not reported	-
AT1G15050	Belongs to auxin inducible gene family. protein_coding INDOLE-3-ACETIC ACID INDUCIBLE 34 (IAA34) INDOLE-3-ACETIC ACID INDUCIBLE 34 (IAA34)		1.16096	0.00219066		0.0742265	0.981503		0.299222	0.768092		0.511471		UP	-	-	-		-	-	not reported	-
ATCG01070	NADH dehydrogenase ND4L protein_coding (NDHE) (NDHE)		1.22972	0.00451398		0.100982	0.965687		0.203377	0.999977		0.511358		UP	-	-	-		-	-	not reported	-
AT1G67270	Zinc-finger domain of monoamine-oxidase A repressor R1 protein;(source:Araport11) protein_coding		1.48097	0.000106809		0.0683395	0.96669		-0.0191965	0.999977		0.510036		UP	-	-	-		-	-	not reported	-
AT3G13820	F-box and associated interaction domains-containing protein;(source:Araport11) protein_coding		1.58496	0.0273641		-0.0471169	0.998915		-0.0127725	0.999977		0.508358		UP	-	-	-		-	-	not reported	-
AT5G44440	FAD-binding Berberine family protein;(source:Araport11) protein_coding		1.95345	0.000726206		-0.327602	0.666005		-0.100782	0.999977		0.508354		UP	-	-	-		-	YES	YES	-
AT4G15270	glucosyltransferase-like protein;(source:Araport11) protein_coding		0.764445	0.0446903		0.483926	0.26324		0.274351	0.956612		0.507574		UP	-	-	-		-	-	not reported	-
AT5G59190	subtilase family protein;(source:Araport11) protein_coding		1.21975	0.00674416		0.323513	0.614531		-0.0223303	0.999977		0.506978		UP	-	-	-		YES	-	not reported	-
AT3G05400	Major facilitator superfamily protein;(source:Araport11) protein_coding		1.81754	0.0063457		-0.281457	0.853427		-0.0157063	0.999977		0.506793		UP	-	-	-		YES	YES	no	-
AT2G24120	DNA/RNA polymerases superfamily protein;(source:Araport11) protein_coding SCABRA 3 (SCA3) SCABRA 3 (SCA3);PIGMENT DEFECTIVE 319 (PDE319)		0.823821	0.00154237		0.276557	0.271841		0.409744	0.179393		0.503374		UP	-	-	-		-	-	not reported	-
AT2G26150	member of Heat Stress Transcription Factor (Hsf) family. Involved in response to misfolded protein accumulation in the cytosol. Regulated by alternative splicing and non-sense-mediated decay. protein_coding HEAT SHOCK TRANSCRIPTION FACTOR A2 (HSFA2) HEAT SHOCK TRANSCRIPTION FACTOR A2 (ATHSFA2);HEAT SHOCK TRANSCRIPTION FACTOR A2 (HSFA2)		1.3913	0.00522059		0.134771	0.946742		-0.0174817	0.999977		0.502865		UP	-	-	-		-	-	not reported	-
AT4G31805	Encodes POLAR, a scaffold protein associated with cellular asymmetry of meristemoids. Its transcript levels change after inducing MUTE expression in a mute background. protein_coding POLAR LOCALIZATION DURING ASYMMETRIC DIVISION AND REDISTRIBUTION (POLAR) POLAR LOCALIZATION DURING ASYMMETRIC DIVISION AND REDISTRIBUTION (POLAR)		1.66096	0.0492701		-0.119519	0.998163		-0.0366814	0.999977		0.501588		UP	-	-	-		-	-	not reported	-
AT1G66160	CYS, MET, PRO, and GLY protein 1;(source:Araport11) protein_coding "CYS, MET, PRO, AND GLY PROTEIN 1" (CMPG1) "CYS, MET, PRO, AND GLY PROTEIN 1" (CMPG1); (ATCMPG1)		0.808943	0.0208125		0.177304	0.812347		0.516939	0.325346		0.501062		UP	-	-	-		-	-	not reported	-
AT2G42800	receptor like protein 29;(source:Araport11) protein_coding RECEPTOR LIKE PROTEIN 29 (RLP29) RECEPTOR LIKE PROTEIN 29 (RLP29);RECEPTOR LIKE PROTEIN 29 (AtRLP29)		1.45345	0.00253222		0.0584053	0.998195		-0.00957378	0.999977		0.500759		UP	-	-	-		-	-	not reported	-
AT2G39705	ROTUNDIFOLIA like 8;(source:Araport11) protein_coding ROTUNDIFOLIA LIKE 8 (RTFL8) ROTUNDIFOLIA LIKE 8 (RTFL8);DEVIL 11 (DVL11)		0.821314	0.0132784		0.29526	0.494906		0.384763	0.513404		0.500445		UP	-	-	-		-	YES	YES	-
AT2G29120	member of Putative ligand-gated ion channel subunit family protein_coding GLUTAMATE RECEPTOR 2.7 (GLR2.7) GLUTAMATE RECEPTOR 2.7 (ATGLR2.7);GLUTAMATE RECEPTOR 2.7 (GLR2.7);GLUTAMATE RECEPTOR 2.7 (GLR2.7)		1.6354	4.96e-06		-0.125815	0.715495		-0.0102617	0.999977		0.499774		UP	-	-	-		-	-	not reported	-
AT3G23550	MATE efflux family protein;(source:Araport11) protein_coding DETOXIFICATION 18 (DTX18) DETOXIFICATION 18 (DTX18)		0.815889	0.0237847		0.335573	0.479188		0.340705	0.718138		0.497389		UP	-	-	-		-	-	not reported	-
AT5G59100	Subtilisin-like serine endopeptidase family protein;(source:Araport11) protein_coding		1.5	0.00142748		0.0400678	0.998915		-0.0480443	0.999977		0.497341		UP	-	-	-		-	-	not reported	-
AT1G17200	Uncharacterized protein family (UPF0497);(source:Araport11) protein_coding CASP-LIKE PROTEIN 2A1 (CASPL2A1) CASP-LIKE PROTEIN 2A1 (CASPL2A1)		1.19535	0.0200282		0.302471	0.748199		-0.00996857	0.999977		0.495952		UP	-	-	-		-	-	not reported	-
AT1G78100	F-box family protein;(source:Araport11) protein_coding AUXIN UP-REGULATED F-BOX PROTEIN 1 (AUF1) AUXIN UP-REGULATED F-BOX PROTEIN 1 (AUF1)		0.825917	0.000749987		0.244794	0.280806		0.41548	0.114044		0.495397		UP	-	-	-		YES	YES	no	-
AT4G35660	selection/upkeep of intraepithelial T-cells protein, putative (DUF241);(source:Araport11) protein_coding		1.31397	7.81e-06		0.187129	0.357747		-0.01563	0.999977		0.495157		UP	-	-	-		-	-	not reported	-
AT3G12960	seed maturation protein;(source:Araport11) protein_coding SEED MATURATION PROTEIN 1 (SMP1) SEED MATURATION PROTEIN 1 (SMP1)		1.79248	0.00541074		-0.168684	0.952826		-0.141242	0.999977		0.494185		UP	-	-	-		-	YES	no	-
AT5G25180	putative cytochrome P450 protein_coding "CYTOCHROME P450, FAMILY 71, SUBFAMILY B, POLYPEPTIDE 14" (CYP71B14) "CYTOCHROME P450, FAMILY 71, SUBFAMILY B, POLYPEPTIDE 14" (CYP71B14)		1.5	0.00390317		-0.00891157	0.9993		-0.00954324	0.999977		0.493848		UP	-	-	-		YES	YES	no	-
AT4G34440	Encodes a member of the proline-rich extensin-like receptor kinase (PERK) family. This family consists of 15 predicted receptor kinases (PMID: 15653807). protein_coding PROLINE-RICH EXTENSIN-LIKE RECEPTOR KINASE 5 (PERK5) PROLINE-RICH EXTENSIN-LIKE RECEPTOR KINASE 5 (AtPERK5);PROLINE-RICH EXTENSIN-LIKE RECEPTOR KINASE 5 (PERK5)		1.58496	0.00606511		-0.0826202	0.996372		-0.0210854	0.999977		0.493752		UP	-	-	-		-	-	not reported	-
ATCG00650	chloroplast-encoded ribosomal protein S18 protein_coding RIBOSOMAL PROTEIN S18 (RPS18) RIBOSOMAL PROTEIN S18 (RPS18)		1.36158	0.0058425		0.13955	0.940112		-0.0204644	0.999977		0.493555		UP	-	-	-		-	-	not reported	-
AT1G35890	NAC (No Apical Meristem) domain transcriptional regulator superfamily protein;(source:Araport11) protein_coding		1.5	0.00285073		-0.00399453	0.9993		-0.0157903	0.999977		0.493405		UP	-	-	-		-	-	not reported	-
AT5G21100	Plant L-ascorbate oxidase;(source:Araport11) protein_coding		1.48307	8.33e-05		-0.0764841	0.947531		0.0733346	0.999977		0.493308		UP	-	-	-		-	-	not reported	-
AT1G23840	transmembrane protein;(source:Araport11) protein_coding		1.54977	0.0265359		-0.0567717	0.998915		-0.0136359	0.999977		0.49312		UP	-	-	-		-	-	not reported	-
AT3G17600	Encodes a member of the Aux/IAA family of proteins implicated in auxin signaling. IAA31 shares several residues with the conserved domain II region, believed to act as a degron in many of the rapidly degraded Aux/IAA family members. An IAA31 fusion protein is quite long-lived, but can be degraded more rapidly in the presence of auxin. Unlike many other family members, IAA31 transcript levels do n…		1.15761	0.0111114		0.266642	0.737358		0.0526685	0.999977		0.492306		UP	-	-	-		-	-	not reported	-
AT1G10460	germin-like protein (GLP7) protein_coding GERMIN-LIKE PROTEIN 7 (GLP7) GERMIN-LIKE PROTEIN 7 (GLP7)		1.33751	0.000859114		0.0965684	0.946829		0.0366198	0.999977		0.490233		UP	-	-	-		YES	YES	no	-
AT3G25560	NSP-interacting kinase 2;(source:Araport11) protein_coding NSP-INTERACTING KINASE 2 (NIK2) NSP-INTERACTING KINASE 2 (NIK2); (ATNIK2)		0.907073	0.000786066		0.345642	0.136697		0.217346	0.689753		0.49002		UP	-	-	-		-	-	not reported	-
AT5G51480	GPI anchored protein, highly expressed in reproductive tissues. protein_coding SKU5 SIMILAR 2 (SKS2) SKU5 SIMILAR 2 (SKS2)		1.24271	0.0186405		0.270945	0.808135		-0.0446545	0.999977		0.489668		UP	-	-	-		-	-	not reported	-
AT1G19220	Encodes an auxin response factor that contains the conserved VP1-B3 DNA-binding domain at its N-terminus and the Aux/IAA-like domains III and IV present in most ARFs at its C-terminus. The protein interacts with IAA1 (yeast two hybrid) and other auxin response elements such as ER7 and ER9 (yeast one hybrid). ARF19 protein can complement many aspects of the arf7 mutant phenotype and , together wit…		0.548824	0.0311864		0.332696	0.238762		0.586924	0.0756287		0.489482		UP	-	-	-		-	-	not reported	TF
AT4G15210	cytosolic beta-amylase expressed in rosette leaves and inducible by sugar. RAM1 mutants have reduced beta amylase in leaves and stems. protein_coding BETA-AMYLASE 5 (BAM5) (AT-BETA-AMY);REDUCED BETA AMYLASE 1 (RAM1);ARABIDOPSIS THALIANA BETA-AMYLASE (ATBETA-AMY); (BMY1);BETA-AMYLASE 5 (BAM5)		1.5	0.00106015		-0.0132921	0.998933		-0.0231746	0.999977		0.487844		UP	-	-	-		-	-	not reported	-
AT5G20330	beta-1,3-glucanase 4;(source:Araport11) protein_coding "BETA-1,3-GLUCANASE 4" (BETAG4) "BETA-1,3-GLUCANASE 4" (BETAG4)		1.5	0.00101303		-0.018877	0.998915		-0.0184607	0.999977		0.487554		UP	-	-	-		YES	-	not reported	-
AT3G55700	UDP-Glycosyltransferase superfamily protein;(source:Araport11) protein_coding		1.25595	0.00924904		0.205608	0.855508		0.000863954	0.999977		0.487474		UP	-	-	-		-	-	not reported	-
AT1G31550	GDSL-motif esterase/acyltransferase/lipase. Enzyme group with broad substrate specificity that may catalyze acyltransfer or hydrolase reactions with lipid and non-lipid substrates. protein_coding		1.5	0.00187225		-0.0186507	0.998915		-0.0207053	0.999977		0.486881		UP	-	-	-		-	-	not reported	-
AT1G63750	Disease resistance protein (TIR-NBS-LRR class) family;(source:Araport11) protein_coding		1.29248	0.000164246		0.185335	0.6329		-0.0174089	0.999977		0.486802		UP	-	-	-		-	-	not reported	-
AT2G40130	Encodes a member of an eight-gene family (SMAX1 and SMAX1-like) that has weak similarity to AtHSP101, a ClpB chaperonin required for thermotolerance. protein_coding SMAX1-LIKE 8 (SMXL8) SMAX1-LIKE 8 (SMXL8)		1.63075	0.00421732		-0.155299	0.942702		-0.0166186	0.999977		0.486276		UP	-	-	-		-	-	not reported	-
AT2G39240	RNA polymerase I specific transcription initiation factor RRN3 protein;(source:Araport11) protein_coding		1.5	0.00113854		-0.0251366	0.998915		-0.0175452	0.999977		0.485773		UP	-	-	-		-	-	not reported	-
AT2G18470	Proline-rich extensin-like receptor kinase 4. Functions at an early stage of ABA signalling inhibiting primary root cell elongation by perturbing Ca2+ homeostasis. protein_coding PROLINE-RICH EXTENSIN-LIKE RECEPTOR KINASE 4 (PERK4) PROLINE-RICH EXTENSIN-LIKE RECEPTOR KINASE 4 (AtPERK4);PROLINE-RICH EXTENSIN-LIKE RECEPTOR KINASE 4 (PERK4)		1.90368	0.0118628		-0.389678	0.798868		-0.0569144	0.999977		0.485695		UP	-	-	-		-	-	not reported	-
AT3G47240	transposable_element_gene;(source:Araport11);similar to unknown protein [Arabidopsis thaliana] (TAIR:AT1G54926.1);(source:TAIR10) transposable_element_gene		1.5	0.00526174		-0.00936023	0.9993		-0.0374166	0.999977		0.484408		UP	-	-	-		-	-	not reported	-
AT5G15110	Pectate lyase family protein;(source:Araport11) protein_coding		1.5	0.00152873		-0.0282497	0.998915		-0.0201469	0.999977		0.483868		UP	-	-	-		-	-	not reported	-
AT1G12490	F-box associated ubiquitination effector family protein;(source:Araport11) protein_coding		1.66096	0.00337497		-0.185068	0.911913		-0.0245045	0.999977		0.483797		UP	-	-	-		-	-	not reported	-
AT1G35820	heat shock protein;(source:Araport11) protein_coding		1.5	0.0020317		-0.0371786	0.998915		-0.0152607	0.999977		0.48252		UP	-	-	-		-	-	not reported	-
AT1G47960	Plant cell wall (CWI) and vacuolar invertases (VI) play important roles in carbohydrate metabolism, stress responses and sugar signaling. This protein may inhibit their activity. protein_coding CELL WALL / VACUOLAR INHIBITOR OF FRUCTOSIDASE 1 (C/VIF1) CELL WALL / VACUOLAR INHIBITOR OF FRUCTOSIDASE 1 (C/VIF1); (ATCIF1); (CIF1);CELL WALL / VACUOLAR INHIBITOR OF FRUCTOSIDASE 1 (ATC/VIF1)		0.941224	0.00468361		-0.0377697	0.998915		0.540852	0.201178		0.481435		UP	-	-	-		-	-	not reported	-
AT1G77570	Winged helix-turn-helix transcription repressor DNA-binding protein;(source:Araport11) protein_coding RESTRICTED TO NUCLEOLUS 1 (REN1) (ATREN1);RESTRICTED TO NUCLEOLUS 1 (REN1)		1.02864	0.000645756		0.38431	0.131911		0.0197498	0.999977		0.477568		UP	-	-	-		-	-	not reported	-
AT3G25450	transposable_element_gene;(source:Araport11);copia-like retrotransposon family, has a 6.7e-211 P-value blast match to gb|AAO73527.1| gag-pol polyprotein (Glycine max) (SIRE1) (Ty1_Copia-family);(source:TAIR10) transposable_element_gene		1.5	0.000494918		-0.0459378	0.998315		-0.0215401	0.999977		0.477507		UP	-	-	-		-	-	not reported	-
AT5G35660	Glycine-rich protein family;(source:Araport11) protein_coding		2	0.000892955		-0.0319584	0.998915		-0.537085	0.601322		0.476986		UP	-	-	-		-	-	not reported	-
AT2G42610	LIGHT-DEPENDENT SHORT HYPOCOTYLS-like protein (DUF640);(source:Araport11) protein_coding LIGHT SENSITIVE HYPOCOTYLS 10 (LSH10) LIGHT SENSITIVE HYPOCOTYLS 10 (LSH10)		1.28028	0.000569858		0.115731	0.895643		0.0348991	0.999977		0.476969		UP	-	-	-		-	YES	no	-
AT1G09370	Plant invertase/pectin methylesterase inhibitor superfamily protein;(source:Araport11) protein_coding		1.86848	7.27e-05		-0.415115	0.249253		-0.022783	0.999977		0.476861		UP	-	-	-		-	-	not reported	-
AT3G05790	Encodes a member of the Lon protease-like proteins (Lon1/At5g26860, Lon2/At5g47040, Lon3/At3g05780, Lon4/At3g05790). Lon is a multifunctional ATP-dependent protease which exists in bacteria, archaea and within organelles in eukaryotic cells. Lon proteases are responsible for the degradation of abnormal, damaged and unstable proteins. protein_coding LON PROTEASE 4 (LON4) LON PROTEASE 4 (LON4)		1.6112	0.00924173		-0.161039	0.956063		-0.0207084	0.999977		0.476483		UP	-	-	-		-	-	not reported	-
AT5G37840	plastid movement impaired protein;(source:Araport11) protein_coding		1.5	0.000441708		-0.0470901	0.998163		-0.0328074	0.999977		0.473367		UP	-	-	-		-	-	not reported	-
AT2G36750	UDP-glucosyl transferase 73C1;(source:Araport11) protein_coding UDP-GLUCOSYL TRANSFERASE 73C1 (UGT73C1) UDP-GLUCOSYL TRANSFERASE 73C1 (UGT73C1)		1.5	0.00184722		-0.0562733	0.998315		-0.0240245	0.999977		0.473234		UP	-	-	-		-	-	not reported	-
AT5G17170	rubredoxin family protein;(source:Araport11) protein_coding ENHANCER OF SOS3-1 (ENH1) ENHANCER OF SOS3-1 (ENH1)		1.40368	0.00119742		0.0351472	0.998915		-0.0217846	0.999977		0.472347		UP	-	-	-		-	-	not reported	-
AT4G12250	UDP-D-glucuronate 4-epimerase protein_coding UDP-D-GLUCURONATE 4-EPIMERASE 5 (GAE5) UDP-D-GLUCURONATE 4-EPIMERASE 5 (GAE5)		0.93893	0.000872911		0.398269	0.0989079		0.078482	0.999977		0.471894		UP	-	-	-		-	YES	no	-
ATCG00480	chloroplast-encoded gene for beta subunit of ATP synthase protein_coding ATP SYNTHASE SUBUNIT BETA (PB) (CF1BETA);ATP SYNTHASE SUBUNIT BETA (PB);ATP SYNTHASE SUBUNIT BETA (ATPB); (ATHCF1BETA)		0.986847	0.00193533		-0.00461417	0.9993		0.429954	0.295974		0.470729		UP	-	-	-		-	-	not reported	-
AT4G33980	hypothetical protein;(source:Araport11) protein_coding COLD-REGULATED GENE 28 (COR28) COLD-REGULATED GENE 28 (COR28)		0.838174	0.0305		0.167276	0.865734		0.405864	0.632478		0.470438		UP	-	-	-		-	YES	no	-
AT1G44478	Cyclophilin;(source:Araport11) protein_coding		1.5	0.00326968		-0.0494025	0.998915		-0.042113	0.999977		0.469495		UP	-	-	-		-	-	not reported	-
AT2G43220	Cysteine/Histidine-rich C1 domain family protein;(source:Araport11) protein_coding		1.30525	0.000318208		0.129359	0.844686		-0.0291375	0.999977		0.46849		UP	-	-	-		-	-	not reported	-
AT5G57570	GCK domain-containing protein;(source:Araport11) protein_coding		1.47418	0.00367406		-0.0117579	0.998933		-0.0584709	0.999977		0.467985		UP	-	-	-		-	-	not reported	-
AT2G23290	Member of the R2R3 factor gene family. protein_coding MYB DOMAIN PROTEIN 70 (MYB70) MYB DOMAIN PROTEIN 70 (MYB70);MYB DOMAIN PROTEIN 70 (AtMYB70)		0.845448	0.0161118		0.0246296	0.998915		0.530619	0.297902		0.466899		UP	-	-	-		YES	YES	YES	-
AT3G14670	hypothetical protein;(source:Araport11) protein_coding		1.46481	0.002548		0.0163633	0.998915		-0.0880692	0.999977		0.464367		UP	-	-	-		-	-	not reported	-
AT1G37140	Amember of mei2-like gene family; phylogenetic analysis revealed that it belongs to the fourth clade of mei2-like proteins, with conserved C-terminal RNA recognition motif (RRM) only. MCT1 expression is increased in the presence of ABA and RNAi suppression showed increased germination rates in the presence of ABA. protein_coding MEI2 C-TERMINAL RRM ONLY LIKE 1 (MCT1) MEI2 C-TERMINAL RRM ONLY LIKE…		1.5	0.00192869		-0.110023	0.962609		0.00238705	0.999977		0.464121		UP	-	-	-		-	-	not reported	-
AT5G25530	DNAJ heat shock family protein;(source:Araport11) protein_coding		1.5222	6.88e-05		-0.104725	0.886239		-0.025165	0.999977		0.464102		UP	-	-	-		-	-	not reported	-
AT1G09400	FMN-linked oxidoreductases superfamily protein;(source:Araport11) protein_coding		1.14762	0.00131179		0.254897	0.55668		-0.0104018	0.999977		0.464037		UP	-	-	-		-	-	not reported	-
AT5G17800	Member of the R2R3 factor gene family that acts as a cell-specific repressor of quiescent center (QC) divisions in the primary root, acting through the BR signaling pathway. Works with BES1 to regulate QC division in the root. protein_coding MYB DOMAIN PROTEIN 56 (MYB56) MYB DOMAIN PROTEIN 56 (MYB56);BRASSINOSTEROIDS AT VASCULAR AND ORGANIZING CENTER (BRAVO);MYB DOMAIN PROTEIN 56 (AtMYB56)		0.894004	0.0146114		-0.182764	0.812298		0.680226	0.154265		0.463822		UP	-	-	-		-	-	not reported	-
AT3G22160	JAV1 is a repressor of jasmonate-mediated defense responses. protein_coding JASMONATE-ASSOCIATED VQ MOTIF GENE 1 (JAV1) JASMONATE-ASSOCIATED VQ MOTIF GENE 1 (JAV1)		0.756069	0.00463522		0.237908	0.457734		0.3967	0.266215		0.463559		UP	-	-	-		-	YES	no	-
AT3G44800	Meprin and TRAF (MATH) homology domain-containing protein;(source:Araport11) protein_coding		1.40796	0.000364995		-0.00395353	0.9993		-0.0175115	0.999977		0.462164		UP	-	-	-		-	-	not reported	-
AT5G17380	Thiamine pyrophosphate dependent pyruvate decarboxylase family protein;(source:Araport11) protein_coding		0.674436	0.0155795		0.336205	0.274298		0.375194	0.387902		0.461945		UP	-	-	-		-	-	not reported	-
AT1G54020	GDSL-motif esterase/acyltransferase/lipase. Enzyme group with broad substrate specificity that may catalyze acyltransfer or hydrolase reactions with lipid and non-lipid substrates. protein_coding		1.6112	0.0156602		-0.221033	0.925055		-0.00827071	0.999977		0.460631		UP	-	-	-		-	-	not reported	-
AT5G46370	Encodes AtTPK2 (KCO2), a member of the Arabidopsis thaliana K+ channel family of AtTPK/KCO proteins. AtTPK2 is targeted to the vacuolar membrane. May form homomeric ion channels in vivo. protein_coding CA2+ ACTIVATED OUTWARD RECTIFYING K+ CHANNEL 2 (KCO2) CA2+ ACTIVATED OUTWARD RECTIFYING K+ CHANNEL 2 (KCO2);CA2+ ACTIVATED OUTWARD RECTIFYING K+ CHANNEL 2 (ATKCO2);TANDEM PORE K+ CHANNEL 2 (ATTPK2)		1.34126	7.44e-05		0.0472934	0.986204		-0.00902137	0.999977		0.459844		UP	-	-	-		-	-	not reported	-
AT2G32100	ovate family protein 16;(source:Araport11) protein_coding OVATE FAMILY PROTEIN 16 (OFP16) OVATE FAMILY PROTEIN 16 (OFP16);RABIDOPSIS THALIANA OVATE FAMILY PROTEIN 16 (ATOFP16)		1.16626	0.000770385		0.20951	0.634322		-0.0031186	0.999977		0.45755		UP	-	-	-		YES	-	not reported	-
AT1G09340	Encodes CHLOROPLAST RNA BINDING (CRB), a putative RNA-binding protein. CRB is important for the proper functioning of the chloroplast. Mutations in CRB also affects the circadian system, altering the expression of both oscillator and output genes. The mRNA is cell-to-cell mobile. protein_coding CHLOROPLAST RNA BINDING (CRB) CRUCIFERIN B (CRB);HETEROGLYCAN-INTERACTING PROTEIN 1.3 (HIP1.3);CHLOROPL…		1.31781	0.00476453		0.0637685	0.997265		-0.0102046	0.999977		0.457124		UP	-	-	-		-	-	not reported	-
AT5G08750	RING/FYVE/PHD zinc finger superfamily protein;(source:Araport11) protein_coding		0.731974	0.018089		0.232859	0.614251		0.405297	0.417648		0.45671		UP	-	-	-		-	-	not reported	-
AT5G17200	Pectin lyase-like superfamily protein;(source:Araport11) protein_coding		1.29248	0.000239809		0.101786	0.898256		-0.0245074	0.999977		0.456587		UP	-	-	-		-	-	not reported	-
AT1G48390	RNI-like superfamily protein;(source:Araport11) protein_coding		1.23991	2.37e-05		0.136533	0.634322		-0.0172139	0.999977		0.453077		UP	-	-	-		-	-	not reported	-
AT5G18090	AP2/B3-like transcriptional factor family protein;(source:Araport11) protein_coding		1.24216	0.000640036		0.122069	0.875781		-0.00521495	0.999977		0.453003		UP	-	-	-		-	-	not reported	-
AT5G56510	Encodes a member of the Arabidopsis Pumilio (APUM) proteins containing PUF domain (eight repeats of approximately 36 amino acids each). PUF proteins regulate both mRNA stability and translation through sequence-specific binding to the 3' UTR of target mRNA transcripts. protein_coding PUMILIO 12 (PUM12) PUMILIO 12 (APUM12);PUMILIO 12 (PUM12);WHITE RUST RESISTANCE 4 (WRR4)		1.5	0.0472092		-0.126135	0.994733		-0.0150752	0.999977		0.45293		UP	-	-	-		-	-	not reported	-
AT4G37260	Member of the R2R3 factor gene family. The mRNA is cell-to-cell mobile. protein_coding MYB DOMAIN PROTEIN 73 (MYB73) MYB DOMAIN PROTEIN 73 (MYB73); (ATMYB73)		1.14264	0.00352023		0.11979	0.925055		0.090997	0.999977		0.451141		UP	-	-	-		YES	YES	YES	-
AT5G27220	Frigida-like protein;(source:Araport11) protein_coding		1.25125	0.0305859		0.0976541	0.994021		-0.00196048	0.999977		0.448981		UP	-	-	-		-	-	not reported	-
AT5G37290	ARM repeat superfamily protein;(source:Araport11) protein_coding		0.65067	0.0158669		0.130244	0.825838		0.565016	0.100562		0.448644		UP	-	-	-		-	-	not reported	-
AT3G50770	calmodulin-like 41;(source:Araport11) protein_coding CALMODULIN-LIKE 41 (CML41) CALMODULIN-LIKE 41 (CML41)		1.34926	0.00335661		0.0126525	0.998933		-0.0165763	0.999977		0.448447		UP	-	-	-		-	YES	no	-
AT4G22150	Arabidopsis thaliana CDC48-interacting UBX-domain protein (PUX3) protein_coding PLANT UBX DOMAIN-CONTAINING PROTEIN 3 (PUX3) (PUX3);PLANT UBX DOMAIN-CONTAINING PROTEIN 3 (PUX3)		1.28547	8.69e-05		0.095403	0.874673		-0.0361085	0.999977		0.448254		UP	-	-	-		-	-	not reported	-
AT5G02390	Target promoter of the male germline-specific transcription factor DUO1. protein_coding DUO1-ACTIVATED UNKNOWN 1 (DAU1) TON1 RECRUITING MOTIF 16 (TRM16);DUO1-ACTIVATED UNKNOWN 1 (DAU1)		1.26973	0.00040295		0.133902	0.836728		-0.0602254	0.999977		0.447803		UP	-	-	-		-	-	not reported	-
AT2G25990	hypothetical protein;(source:Araport11) protein_coding		1.29248	0.00248604		0.0751599	0.986957		-0.02438	0.999977		0.447754		UP	-	-	-		-	-	not reported	-
AT3G51430	Although this enzyme is predicted to encode a strictosidine synthase (SS), it lacks a conserved catalytic glutamate residue found in active SS enzymes and it is not expected to have SS activity. protein_coding YELLOW-LEAF-SPECIFIC GENE 2 (YLS2) YELLOW-LEAF-SPECIFIC GENE 2 (YLS2);STRICTOSIDINE SYNTHASE-LIKE 5 (SSL5)		0.861246	0.00155915		0.159626	0.674658		0.322288	0.38788		0.44772		UP	-	-	-		-	-	not reported	-
AT2G06660	transposable_element_gene;(source:Araport11);Mariner-like transposase family, has a 2.3e-43 P-value blast match to GB:S20478 hypothetical protein (Mariner_Tc1-element) (Drosophila melanogaster);(source:TAIR10) transposable_element_gene		1.5	0.00163795		-0.0684962	0.994354		-0.0888461	0.999977		0.447553		UP	-	-	-		-	-	not reported	-
AT4G24930	thylakoid lumenal 17.9 kDa protein, chloroplast;(source:Araport11) protein_coding		1.01454	0.00413118		0.271039	0.55668		0.0568323	0.999977		0.447471		UP	-	-	-		-	-	not reported	-
AT1G09970	RLK7 belongs to a leucine-rich repeat class of receptor-likekinase (LRR-RLKs). It is involved in the control of germination speed and the tolerance to oxidant stress. The mRNA is cell-to-cell mobile. protein_coding (LRR XI-23) RECEPTOR-LIKE KINASE 7 (RLK7); (LRR XI-23)		0.674208	0.0202868		0.490363	0.0989079		0.175975	0.999977		0.446848		UP	-	-	-		-	YES	no	-
AT3G05410	Photosystem II reaction center PsbP family protein;(source:Araport11) protein_coding		0.966612	0.0309741		0.152511	0.925055		0.220024	0.999977		0.446382		UP	-	-	-		-	-	not reported	-
AT4G25050	encodes an acyl carrier protein predominantly expressed in leaves. Gene expression is upregulated by light. protein_coding ACYL CARRIER PROTEIN 4 (ACP4) (ATACP4);ACYL CARRIER PROTEIN 4 (ACP4)		0.983497	0.0130222		0.3531	0.493019		0.000700514	0.999977		0.445766		UP	-	-	-		-	-	not reported	-
AT1G02850	beta glucosidase 11;(source:Araport11) protein_coding BETA GLUCOSIDASE 11 (BGLU11) BETA GLUCOSIDASE 11 (BGLU11)		0.963687	0.00437557		0.0991923	0.931136		0.273796	0.783852		0.445558		UP	-	-	-		-	-	not reported	-
AT1G27980	dihydrosphingosine phosphate lyase;(source:Araport11) protein_coding DIHYDROSPHINGOSINE PHOSPHATE LYASE (DPL1) (ATDPL1);DIHYDROSPHINGOSINE PHOSPHATE LYASE (DPL1)		0.553667	0.0182866		0.393403	0.0997177		0.389549	0.23289		0.44554		UP	-	-	-		YES	YES	no	-
AT3G52430	Encodes a lipase-like gene that is important for salicylic acid signaling and function in resistance (R) gene-mediated and basal plant disease resistance. PAD4 can interact directly with EDS1, another disease resistance signaling protein. Expressed at elevated level in response to green peach aphid (GPA) feeding, and modulates the GPA feeding-induced leaf senescence through a mechanism that doesn…		0.65756	0.00508619		0.451795	0.0445572		0.224867	0.639184		0.444741		UP	-	-	-		-	-	not reported	-
AT5G54540	Uncharacterized conserved protein (UCP012943);(source:Araport11) protein_coding		0.559402	0.0294135		0.260938	0.420814		0.512571	0.132978		0.444304		UP	-	-	-		-	YES	no	-
AT1G14040	Encodes a PHO1 homologue that is upregulated in response to Zn deficiency and is involved in Pi homeostasis in response to Zn deficiency. The mRNA is cell-to-cell mobile. protein_coding PHO1 HOMOLOG 3 (PHO1;H3) PHO1 HOMOLOG 3 (PHO1;H3)		0.615685	0.0418748		0.579283	0.0669767		0.13597	0.999977		0.443646		UP	-	-	-		-	-	not reported	-
AT1G01520	RVE3 is one of eleven homologous MYB-like transcription factors in Arabidopsis and a member of the RVE8 clade. Plays a minor role in clock regulation. protein_coding ALTERED SEED GERMINATION 4 (ASG4) REVEILLE 3 (REV3);ALTERED SEED GERMINATION 4 (ASG4)		1.5	0.00128583		-0.160636	0.880922		-0.0108747	0.999977		0.44283		UP	-	-	-		-	-	not reported	-
AT3G14240	Subtilase family protein;(source:Araport11) protein_coding		0.657021	0.00631341		0.264847	0.310051		0.402922	0.193328		0.441597		UP	-	-	-		-	-	not reported	-
ATCG00680	encodes for CP47, subunit of the photosystem II reaction center. protein_coding PHOTOSYSTEM II REACTION CENTER PROTEIN B (PSBB) PHOTOSYSTEM II REACTION CENTER PROTEIN B (PSBB)		1.33501	0.000112961		-0.00413307	0.9993		-0.00931982	0.999977		0.440519		UP	-	-	-		-	-	not reported	-
AT5G12280	SWAP (Suppressor-of-White-APricot)/surp RNA-binding domain-containing protein;(source:Araport11) protein_coding		1.35022	0.000302589		-0.0188828	0.998915		-0.0140026	0.999977		0.439111		UP	-	-	-		-	-	not reported	-
AT5G62260	AT hook motif DNA-binding family protein;(source:Araport11) protein_coding AT-HOOK MOTIF NUCLEAR LOCALIZED PROTEIN 6 (AHL6) AT-HOOK MOTIF NUCLEAR LOCALIZED PROTEIN 6 (AHL6)		0.877413	0.00551151		0.525577	0.0830994		-0.0892389	0.999977		0.437917		UP	-	-	-		-	-	not reported	-
AT2G47260	Encodes a member of WRKY Transcription Factor; Group I. Involved in nematode feeding site establishment and auxin mediated PIN polar localization in roots. Expression is induced by auxin. protein_coding WRKY DNA-BINDING PROTEIN 23 (WRKY23) WRKY DNA-BINDING PROTEIN 23 (ATWRKY23);WRKY DNA-BINDING PROTEIN 23 (WRKY23)		0.967769	0.00591765		0.223799	0.675028		0.122112	0.999977		0.437893		UP	-	-	-		-	-	not reported	-
AT3G22360	encodes an alternative oxidase whose expression is limited to flowers and floral buds. protein_coding ALTERNATIVE OXIDASE 1B (AOX1B) ALTERNATIVE OXIDASE 1B (AOX1B)		1.5	0.000305411		-0.160539	0.81834		-0.0267573	0.999977		0.437568		UP	-	-	-		-	-	not reported	-
AT5G33390	glycine-rich protein;(source:Araport11) protein_coding		0.935182	0.0112743		0.249417	0.661994		0.125746	0.999977		0.436782		UP	-	-	-		-	-	not reported	-
AT1G11690	BRANCHLESS TRICHOME-like protein;(source:Araport11) protein_coding		1.58496	0.00188223		-0.102683	0.977126		-0.171994	0.999977		0.436762		UP	-	-	-		-	-	not reported	-
AT1G17310	MADS-box transcription factor family protein;(source:Araport11) protein_coding AGAMOUS-LIKE 100 (AGL100) AGAMOUS-LIKE 100 (AGL100)		0.955818	0.00161865		0.238975	0.496938		0.114782	0.999977		0.436525		UP	-	-	-		YES	YES	YES	-
AT2G15550	transposable_element_gene;(source:Araport11);similar to unknown protein [Arabidopsis thaliana] (TAIR:AT2G16410.1);(source:TAIR10) transposable_element_gene		1.25117	0.00383915		0.0696425	0.992376		-0.0116321	0.999977		0.436394		UP	-	-	-		-	-	not reported	-
AT2G42830	AGAMOUS [AG]-like MADS box protein (AGL5) involved in fruit development (valve margin and dehiscence zone differentiation). A putative direct target of AG. SHP2 has been shown to be a downstream gene of the complex formed by AG and SEP proteins (SEP4 alone does not form a functional complex with AG). protein_coding SHATTERPROOF 2 (SHP2) AGAMOUS-LIKE 5 (AGL5);SHATTERPROOF 2 (SHP2)		1.20752	0.0448129		0.0968291	0.996257		0.00435953	0.999977		0.436236		UP	-	-	-		-	-	not reported	-
AT4G40020	Myosin heavy chain-related protein;(source:Araport11) protein_coding		1.44491	0.000311473		-0.0732391	0.973585		-0.0661558	0.999977		0.435171		UP	-	-	-		-	-	not reported	-
AT5G54720	Ankyrin repeat family protein;(source:Araport11) protein_coding		1.16096	0.000697138		0.269433	0.458907		-0.126473	0.999977		0.434642		UP	-	-	-		YES	YES	not detected	-
AT1G11040	HSP40/DnaJ peptide-binding protein;(source:Araport11) protein_coding		1.27842	0.00993225		0.0526785	0.998915		-0.0280539	0.999977		0.43435		UP	-	-	-		-	-	not reported	-
AT1G05990	EF hand calcium-binding protein family;(source:Araport11) protein_coding ROOT HAIR SPECIFIC 2 (RHS2) ROOT HAIR SPECIFIC 1 (RHS1);ROOT HAIR SPECIFIC 2 (RHS2); (RHS1)		1.32083	0.000825358		0.198371	0.733964		-0.216157	0.995724		0.434348		UP	-	-	-		-	-	not reported	-
AT5G17320	Encodes a homeobox-leucine zipper family protein belonging to the HD-ZIP IV family. protein_coding HOMEODOMAIN GLABROUS 9 (HDG9) HOMEODOMAIN GLABROUS 9 (HDG9)		1.29248	0.00050649		0.0228644	0.998915		-0.0151773	0.999977		0.433389		UP	-	-	-		-	-	not reported	-
AT3G55970	One of 4 paralogs encoding a 2-oxoglutarate/Fe(II)-dependent oxygenases that hydroxylates JA to 12-OH-JA. protein_coding JASMONATE-REGULATED GENE 21 (JRG21) (ATJRG21);JASMONIC ACID OXIDASE 3 (JAO3);JASMONATE-INDUCED OXYGENASE3 (JOX3);JASMONATE-REGULATED GENE 21 (JRG21)		1.23117	0.00535107		0.0820132	0.986957		-0.0140632	0.999977		0.433041		UP	-	-	-		-	-	not reported	-
AT5G53320	Leucine-rich repeat protein kinase family protein;(source:Araport11) protein_coding		0.585449	0.02864		0.256143	0.464161		0.455561	0.228672		0.432384		UP	-	-	-		-	-	not reported	-
AT5G01410	Encodes a protein predicted to function in tandem with PDX2 to form glutamine amidotransferase complex with involved in vitamin B6 biosynthesis. protein_coding REDUCED SUGAR RESPONSE 4 (RSR4) (PDX1);ARABIDOPSIS THALIANA PYRIDOXINE BIOSYNTHESIS 1.3 (ATPDX1.3); (ATPDX1);PYRIDOXINE BIOSYNTHESIS 1.3 (PDX1.3);REDUCED SUGAR RESPONSE 4 (RSR4)		0.602061	0.049352		0.514478	0.11203		0.17929	0.999977		0.431943		UP	-	-	-		-	-	not reported	-
AT1G47920	RNI-like superfamily protein;(source:Araport11) protein_coding		1.5	0.00289982		-0.196585	0.862511		-0.00771952	0.999977		0.431899		UP	-	-	-		-	-	not reported	-
AT2G19770	Encodes profilin 5, originally named profilin 4 (PRO4/PFN4). Low-molecular weight, actin monomer-binding protein that regulates the organization of actin cytoskeleton. Pollen-specific plant profilin present predominantly in mature pollen and growing pollen tubes. protein_coding PROFILIN 5 (PRF5) PROFILIN 5 (PRF5)		1.18129	0.00245869		0.110896	0.930106		0.00298203	0.999977		0.431721		UP	-	-	-		-	-	not reported	-
AT1G04100	Auxin induced gene, IAA10 (IAA10). protein_coding INDOLEACETIC ACID-INDUCED PROTEIN 10 (IAA10) INDOLEACETIC ACID-INDUCED PROTEIN 10 (IAA10)		0.579529	0.0489949		0.0822254	0.955148		0.63298	0.10487		0.431578		UP	-	-	-		-	-	not reported	-
AT3G62060	Pectinacetylesterase family protein;(source:Araport11) protein_coding PECTIN ACETYLESTERASE 6 (PAE6) PECTIN ACETYESTERASE 6 (ATPAE6);PECTIN ACETYLESTERASE 6 (PAE6)		0.769568	0.0188208		0.125451	0.894599		0.397064	0.491008		0.430694		UP	-	-	-		-	-	not reported	-
AT4G31280	hypothetical protein;(source:Araport11) protein_coding		1.66096	0.0164813		-0.0730439	0.998915		-0.300597	0.999977		0.429108		UP	-	-	-		-	-	not reported	-
AT1G35420	alpha/beta-Hydrolases superfamily protein;(source:Araport11) protein_coding		1.33535	0.0288333		-0.0396349	0.998915		-0.008901	0.999977		0.428937		UP	-	-	-		-	-	not reported	-
AT1G70760	a subunit of the chloroplast NAD(P)H dehydrogenase complex, involved in PSI cyclic electron transport. Located on the thylakoid membrane. Mutant has impaired NAD(P)H dehydrogenase activity. The mRNA is cell-to-cell mobile. protein_coding NADH DEHYDROGENASE-LIKE COMPLEX L (NdhL) CHLORORESPIRATORY REDUCTION 23 (CRR23);NADH DEHYDROGENASE-LIKE COMPLEX L (NdhL)		1.46281	0.0137106		-0.174895	0.940107		-0.00120314	0.999977		0.428905		UP	-	-	-		-	-	not reported	-
AT1G49750	Leucine-rich repeat (LRR) family protein;(source:Araport11) protein_coding		1.16096	0.00192068		0.139084	0.867698		-0.0146829	0.999977		0.428455		UP	-	-	-		-	-	not reported	-
AT4G28390	Encodes a mitochondrial ADP/ATP carrier protein. Shown in heterologous systems to be located in the plasma membrane. Has comparable affinity for ADP and ATP (in E.coli). protein_coding ADP/ATP CARRIER 3 (AAC3) (ATAAC3);ADP/ATP CARRIER 3 (AAC3)		0.926602	0.00685117		0.0908288	0.952826		0.264965	0.84297		0.427465		UP	-	-	-		-	-	not reported	-
AT1G48000	Encodes a putative transcription factor (MYB112). protein_coding MYB DOMAIN PROTEIN 112 (MYB112) MYB DOMAIN PROTEIN 112 (AtMYB112);MYB DOMAIN PROTEIN 112 (MYB112)		0.885066	0.00277836		0.420109	0.126925		-0.0246541	0.999977		0.426841		UP	-	-	-		YES	YES	no	-
AT4G30430	Member of TETRASPANIN family protein_coding TETRASPANIN9 (TET9) TETRASPANIN9 (TET9)		1.12492	0.000564845		0.167907	0.708552		-0.0125062	0.999977		0.426772		UP	-	-	-		-	-	not reported	-
AT1G12030	phosphoenolpyruvate carboxylase, putative (DUF506);(source:Araport11) protein_coding		1.47243	0.00030024		-0.165799	0.79962		-0.0280537	0.999977		0.426192		UP	-	-	-		YES	-	not reported	-
AT3G30840	hypothetical protein;(source:Araport11) protein_coding		1.29248	0.00390012		0.088109	0.982514		-0.103068	0.999977		0.425841		UP	-	-	-		-	-	not reported	-
AT1G35513	pseudogene of isochorismate synthase-related / isochorismate mutase-related pseudogene		1.29248	0.000942489		0.0095004	0.998933		-0.0245985	0.999977		0.425794		UP	-	-	-		-	-	not reported	-
AT3G11180	One of 4 paralogs encoding a 2-oxoglutarate/Fe(II)-dependent oxygenases that hydroxylates JA to 12-OH-JA. protein_coding JASMONATE-INDUCED OXYGENASE1 (JOX1) JASMONIC ACID OXIDASE 1 (JAO 1);JASMONATE-INDUCED OXYGENASE1 (JOX1)		1.44307	0.0163182		-0.158902	0.957525		-0.00889742	0.999977		0.425089		UP	-	-	-		-	YES	not detected	-
AT1G48870	Transducin/WD40 repeat-like superfamily protein;(source:Araport11) protein_coding		1.43723	0.000341256		-0.1599	0.810492		-0.00373431	0.999977		0.424533		UP	-	-	-		-	-	not reported	-
AT5G14890	potassium transporter;(source:Araport11) protein_coding		1.13011	0.000357733		0.158318	0.704772		-0.0159806	0.999977		0.424149		UP	-	-	-		-	-	not reported	-
AT2G39790	Mitochondrial glycoprotein family protein;(source:Araport11) protein_coding		1.5	0.00131323		-0.222071	0.778192		-0.00862527	0.999977		0.423101		UP	-	-	-		-	-	not reported	-
AT1G01725	adenylosuccinate synthetase;(source:Araport11) protein_coding		0.978995	0.000382096		0.169852	0.594995		0.118592	0.999977		0.42248		UP	-	-	-		-	-	not reported	-
AT5G64440	AtFAAH (fatty acid amide hydrolase) modulates endogenous NAEs (N-Acylethanolamines) levels in plants by hydrolyzing NAEs to ethanolamine and their corresponding free fatty acids. NAE depletion likely participates in the regulation of plant growth. The mRNA is cell-to-cell mobile. protein_coding FATTY ACID AMIDE HYDROLASE (FAAH) FATTY ACID AMIDE HYDROLASE (FAAH);FATTY ACID AMIDE HYDROLASE (AtFAAH)		0.50642	0.0157909		0.434898	0.0408135		0.324139	0.282176		0.421819		UP	-	-	-		-	YES	YES	-
AT1G48290	transposable_element_gene;(source:Araport11);similar to unknown protein [Arabidopsis thaliana] (TAIR:AT1G43660.1);(source:TAIR10) transposable_element_gene		1.29248	0.000387226		-0.0124742	0.998915		-0.0152317	0.999977		0.421592		UP	-	-	-		-	-	not reported	-
AT1G02475	Polyketide cyclase/dehydrase and lipid transport superfamily protein;(source:Araport11) protein_coding		0.81631	0.0120358		0.182752	0.76071		0.264756	0.824796		0.421272		UP	-	-	-		-	-	not reported	-
AT5G66110	Heavy metal transport/detoxification superfamily protein;(source:Araport11) protein_coding HEAVY METAL ASSOCIATED ISOPRENYLATED PLANT PROTEIN 27 (HIPP27) HEAVY METAL ASSOCIATED ISOPRENYLATED PLANT PROTEIN 27 (HIPP27)		1.29248	0.00033076		-0.00492543	0.9993		-0.0242872	0.999977		0.42109		UP	-	-	-		-	-	not reported	-
AT3G29110	Terpenoid cyclases/Protein prenyltransferases superfamily protein;(source:Araport11) protein_coding		1.2539	0.00277518		0.0087927	0.998933		-0.00537941	0.999977		0.419104		UP	-	-	-		-	-	not reported	-
AT2G39360	Protein kinase superfamily protein;(source:Araport11) protein_coding CURVY1 (CVY1) CURVY1 (CVY1)		0.590739	0.0247112		0.314122	0.295361		0.352327	0.41039		0.419063		UP	-	-	-		YES	-	not reported	-
AT1G63590	Receptor-like protein kinase-related family protein;(source:Araport11) protein_coding		1.5	0.00133405		-0.243592	0.73206		-0.00077316	0.999977		0.418545		UP	-	-	-		-	-	not reported	-
AT4G19620	hypothetical protein;(source:Araport11) protein_coding		1.29248	0.000608581		-0.000266	0.999805		-0.037901	0.999977		0.418105		UP	-	-	-		-	-	not reported	-
AT2G17820	Encodes a member of the histidine kinase family. protein_coding HISTIDINE KINASE 1 (HK1) HISTIDINE KINASE 1 (ATHK1);HISTIDINE KINASE 1 (HK1); (AHK1)		0.834377	0.0116501		0.506482	0.128635		-0.0866482	0.999977		0.41807		UP	-	-	-		-	-	not reported	-
AT3G48510	AtIII18x5-like protein;(source:Araport11) protein_coding (AITR2) DYNAMIC INFLUENCER OF GENE EXPRESSION 1 (DIG1); (AITR2)		1.42622	0.0106599		-0.150249	0.953166		-0.0228648	0.999977		0.417702		UP	-	-	-		-	YES	no	-
AT4G26740	Encodes caleosin, a 27-kDa protein found within seed lipid bodies. Gene is expressed preferentially in the embryo, has similarity to a rice ABA-responsive gene, EFA27. Catalyze hydroperoxide-dependent mono-oxygenation reactions. Require calcium for peroxygenase activity. Probably deeply buried in lipid droplets or microsomes. protein_coding SEED GENE 1 (ATS1) (ATCLO1);SEED GENE 1 (ATS1);CALEOSIN1…		1.39068	2.85e-05		-0.131926	0.725097		-0.00895224	0.999977		0.4166		UP	-	-	-		-	-	not reported	-
AT1G30090	Galactose oxidase/kelch repeat superfamily protein;(source:Araport11) protein_coding		0.684451	0.000726422		0.195459	0.30431		0.368901	0.0848722		0.41627		UP	-	-	-		-	-	not reported	-
AT5G66640	DA1-related protein 3;(source:Araport11) protein_coding DA1-RELATED PROTEIN 3 (DAR3) DA1-RELATED PROTEIN 3 (DAR3)		1.00854	0.0399774		0.271122	0.788346		-0.0312143	0.999977		0.416148		UP	-	-	-		-	-	not reported	-
AT2G44480	beta glucosidase 17;(source:Araport11) protein_coding BETA GLUCOSIDASE 17 (BGLU17) BETA GLUCOSIDASE 17 (BGLU17)		0.57102	0.0354352		0.141382	0.810492		0.533429	0.143449		0.415277		UP	-	-	-		-	-	not reported	-
AT1G14420	Pectate lyase family protein;(source:Araport11) protein_coding (AT59) (AT59)		1.29248	0.00549795		-0.0168326	0.998915		-0.029939	0.999977		0.415237		UP	-	-	-		-	-	not reported	-
AT1G28100	hypothetical protein;(source:Araport11) protein_coding		0.924133	0.0167596		0.368321	0.453869		-0.0468132	0.999977		0.415214		UP	-	-	-		-	-	not reported	-
AT1G78950	Terpenoid cyclases family protein;(source:Araport11) protein_coding BETA-AMYRIN SYNTHASE (BAS) BETA-AMYRIN SYNTHASE (BAS); (ATLUP4); (ATBAS)		1.09455	0.000205184		0.181143	0.565195		-0.0348554	0.999977		0.413612		UP	-	-	-		-	-	not reported	-
AT3G13090	member of MRP subfamily protein_coding ATP-BINDING CASSETTE C6 (ABCC6) MULTIDRUG RESISTANCE-ASSOCIATED PROTEIN 8 (ATMRP8);MULTIDRUG RESISTANCE-ASSOCIATED PROTEIN 8 (MRP8);ATP-BINDING CASSETTE C6 (ABCC6)		0.801913	0.0151815		0.169977	0.802896		0.266267	0.838059		0.412719		UP	-	-	-		-	-	not reported	-
AT3G45050	transmembrane protein;(source:Araport11) protein_coding		1.06875	0.00845728		0.0812628	0.984494		0.086485	0.999977		0.412166		UP	-	-	-		-	YES	no	-
AT5G36190	F-box protein interaction domain protein;(source:Araport11) protein_coding		1	0.000625299		0.248576	0.392571		-0.0121325	0.999977		0.412148		UP	-	-	-		-	-	not reported	-
AT3G30460	RING/U-box superfamily protein;(source:Araport11) protein_coding		1.36848	0.00154237		-0.125726	0.925055		-0.00714276	0.999977		0.411871		UP	-	-	-		-	-	not reported	-
AT3G17980	Calcium-dependent lipid-binding (CaLB domain) family protein;(source:Araport11) protein_coding C2 DOMAIN (C2) ARABIDOPSIS THALIANA C2 DOMAIN (ATC2);C2 DOMAIN (C2);HOMOLOG OF OSGAP1 (ATGAP1);C2-DOMAIN ABA-RELATED (CAR4)		1.16096	0.0150843		0.0784497	0.993951		-0.00672199	0.999977		0.410897		UP	-	-	-		-	-	not reported	-
AT3G15850	Chloroplastic enzyme responsible for the synthesis of 16:1 fatty acids from galactolipids and sulpholipids. Uses ferredoxin as electron donor. The mRNA is cell-to-cell mobile. protein_coding FATTY ACID DESATURASE 5 (FAD5) FATTY ACID DESATURASE 5 (FAD5);FATTY ACID DESATURASE B (FADB); (ATADS3); (ADS3); (JB67)		0.576744	0.0388468		0.061737	0.981771		0.591863	0.109337		0.410115		UP	-	-	-		-	-	not reported	-
AT5G10040	transmembrane protein;(source:Araport11) protein_coding		1	0.000131531		-0.0381698	0.985975		0.267496	0.36322		0.409775		UP	-	-	-		-	-	not reported	-
AT2G31840	Thioredoxin superfamily protein;(source:Araport11) protein_coding MESOPHYLL-CELL RNAI LIBRARY LINE 7-LIKE (MRL7-L) MESOPHYLL-CELL RNAI LIBRARY LINE 7-LIKE (MRL7-L)		0.778452	0.0244711		-0.0715481	0.984979		0.520831	0.314298		0.409245		UP	-	-	-		-	-	not reported	-
AT2G45740	member of the peroxin11 (PEX11) gene family, integral to peroxisome membrane, controls peroxisome proliferation. The mRNA is cell-to-cell mobile. protein_coding PEROXIN 11D (PEX11D) PEROXIN 11D (PEX11D)		0.880025	0.00783219		0.0322965	0.998915		0.313197	0.673039		0.408506		UP	-	-	-		-	-	not reported	-
AT3G60280	Encodes blue copper-binding protein III. protein_coding UCLACYANIN 3 (UCC3) UCLACYANIN 3 (UCC3)		0.84031	0.0256067		0.0712619	0.988153		0.313757	0.830131		0.408443		UP	-	-	-		-	-	not reported	-
AT5G24420	Encodes a cytosolic 6-phosphogluconolactonase (PGL) thought to be involved in the oxidative pentose-phosphate pathway (OPPP). protein_coding 6-PHOSPHOGLUCONOLACTONASE 5 (PGL5) 6-PHOSPHOGLUCONOLACTONASE 5 (PGL5)		1.16096	0.0183219		0.0735949	0.996374		-0.0127978	0.999977		0.407254		UP	-	-	-		-	-	not reported	-
AT4G24810	similar to ABC1 family protein, contains InterPro domain ABC1 protein (InterPro:IPR004147) protein_coding		0.758227	0.0398077		0.0427081	0.998915		0.418644	0.567655		0.406526		UP	-	-	-		-	-	not reported	-
AT5G16920	Fasciclin-like arabinogalactan family protein;(source:Araport11) protein_coding		0.774717	0.0118355		0.363546	0.280607		0.0790102	0.999977		0.405758		UP	-	-	-		-	-	not reported	-
AT4G36150	Disease resistance protein (TIR-NBS-LRR class) family;(source:Araport11) protein_coding		0.559066	0.0462765		0.187439	0.692375		0.469515	0.25053		0.40534		UP	-	-	-		-	-	not reported	-
AT5G53420	CCT motif family protein;(source:Araport11) protein_coding		0.855603	0.0137602		0.0433405	0.998915		0.314617	0.736163		0.40452		UP	-	-	-		-	-	not reported	-
AT4G03880	transposable_element_gene;(source:Araport11);pseudogene, hypothetical protein;(source:TAIR10) transposable_element_gene		1.58496	2.64e-05		-0.297816	0.269921		-0.0758851	0.999977		0.403754		UP	-	-	-		-	-	not reported	-
AT2G16670	transposable_element_gene;(source:Araport11);copia-like retrotransposon family, has a 1.2e-190 P-value blast match to GB:AAB82754 retrofit (TY1_Copia-element) (Oryza longistaminata);(source:TAIR10) transposable_element_gene		1.20752	0.0455796		0.0066658	0.9993		-0.00532842	0.999977		0.402952		UP	-	-	-		YES	-	not reported	-
AT2G45930	hypothetical protein;(source:Araport11) protein_coding		1.09452	0.0179942		0.127402	0.953166		-0.0135235	0.999977		0.402799		UP	-	-	-		-	-	not reported	-
AT3G03020	hypothetical protein;(source:Araport11) protein_coding		1.15705	0.00103605		0.124181	0.872371		-0.073966	0.999977		0.40242		UP	-	-	-		-	-	not reported	-
AT1G33670	Leucine-rich repeat (LRR) family protein;(source:Araport11) protein_coding		1.39496	6.94e-05		-0.174686	0.643808		-0.0134778	0.999977		0.402265		UP	-	-	-		-	-	not reported	-
AT3G19350	Encodes a the C-terminal domain of poly(A) binding proteins. MPC is imprinted such that only the maternal allele is expressed in the endosperm. MPC is silenced by the action of MET1 and its expression is promoted by DEM. protein_coding MATERNALLY EXPRESSED PAB C-TERMINAL (MPC) MATERNALLY EXPRESSED PAB C-TERMINAL (MPC)		1.29248	0.000505075		-0.0387912	0.998459		-0.0481357	0.999977		0.401851		UP	-	-	-		-	-	not reported	-
AT3G63160	Member of the Arabidopsis 7-kDa OEP family. Tail-anchored (TA) membrane protein which possesses a single C-terminal transmembrane domain targeting post-translationally to plastids. protein_coding OUTER ENVELOPE PROTEIN 6 (OEP6) OUTER ENVELOPE PROTEIN 7.2 (OEP7.2);OUTER ENVELOPE PROTEIN 6 (OEP6)		1.34603	0.00143706		0.043242	0.998915		-0.18607	0.999977		0.401066		UP	-	-	-		-	-	not reported	-
AT1G01080	RNA-binding (RRM/RBD/RNP motifs) family protein;(source:Araport11) protein_coding		0.776968	0.0211777		0.237481	0.653395		0.188507	0.999977		0.400985		UP	-	-	-		-	-	not reported	-
AT1G60870	maternal effect embryo arrest 9;(source:Araport11) protein_coding MATERNAL EFFECT EMBRYO ARREST 9 (MEE9) MATERNAL EFFECT EMBRYO ARREST 9 (MEE9)		0.834194	0.00494994		0.360429	0.232154		0.00753743	0.999977		0.40072		UP	-	-	-		-	-	not reported	-
AT1G51480	disease resistance protein (CC-NBS-LRR class) family protein;(source:Araport11) protein_coding RESISTANCE SILENCED GENE 1 (RSG1) RESISTANCE SILENCED GENE 1 (RSG1)		1.08818	0.00591834		0.170355	0.84691		-0.0575558	0.999977		0.400325		UP	-	-	-		-	-	not reported	-
AT3G47770	ABC2 homolog 5;(source:Araport11) protein_coding ATP-BINDING CASSETTE A6 (ABCA6) A. THALIANA ABC2 HOMOLOG 5 (ATATH5);ATP-BINDING CASSETTE A6 (ABCA6);ABC2 HOMOLOG 5 (ATH5)		0.851332	0.00563014		0.414652	0.174419		-0.0666165	0.999977		0.399789		UP	-	-	-		-	-	not reported	-
AT1G22900	Disease resistance-responsive (dirigent-like protein) family protein;(source:Araport11) protein_coding		0.792481	0.0362575		0.418862	0.36222		-0.0161672	0.999977		0.398392		UP	-	-	-		-	-	not reported	-
AT4G21200	Encodes a protein with gibberellin 2-oxidase activity which acts specifically on C-20 gibberellins. protein_coding GIBBERELLIN 2-OXIDASE 8 (GA2OX8) ARABIDOPSIS THALIANA GIBBERELLIN 2-OXIDASE 8 (ATGA2OX8);GIBBERELLIN 2-OXIDASE 8 (GA2OX8)		1.51976	0.00357799		-0.287119	0.736172		-0.0393872	0.999977		0.397753		UP	-	-	-		-	-	not reported	-
AT5G25450	Cytochrome bd ubiquinol oxidase, 14kDa subunit;(source:Araport11) protein_coding		0.918972	0.000197896		0.170287	0.484563		0.103185	0.999977		0.397481		UP	-	-	-		-	-	not reported	-
AT4G00850	Arabidopsis thaliana GRF1-interacting factor 3 (GIF3) mRNA protein_coding GRF1-INTERACTING FACTOR 3 (GIF3) GRF1-INTERACTING FACTOR 3 (GIF3)		0.818521	0.0292839		0.143398	0.900082		0.229187	0.999977		0.397036		UP	-	-	-		-	-	not reported	-
AT2G29800	Galactose oxidase/kelch repeat superfamily protein;(source:Araport11) protein_coding		1.29248	0.000292806		-0.0833746	0.938217		-0.019126	0.999977		0.39666		UP	-	-	-		-	-	not reported	-
AT1G08610	Pentatricopeptide repeat (PPR) superfamily protein;(source:Araport11) protein_coding		0.664315	0.0206568		0.0592337	0.984723		0.464607	0.255073		0.396052		UP	-	-	-		-	-	not reported	-
AT3G48970	Heavy metal transport/detoxification superfamily protein;(source:Araport11) protein_coding		0.850139	0.0247112		-0.328815	0.532193		0.66655	0.200446		0.395958		UP	-	-	-		-	-	not reported	-
AT3G26770	NAD(P)-binding Rossmann-fold superfamily protein;(source:Araport11) protein_coding		0.644493	0.0268017		0.22458	0.60745		0.318445	0.586777		0.395839		UP	-	-	-		-	-	not reported	-
AT3G44830	Lecithin:cholesterol acyltransferase family protein;(source:Araport11) protein_coding		1.30367	0.00492458		-0.0607499	0.998163		-0.0555232	0.999977		0.395797		UP	-	-	-		-	-	not reported	-
AT5G63580	encodes a protein whose sequence is similar to flavonol synthase protein_coding FLAVONOL SYNTHASE 2 (FLS2) (ATFLS2);FLAVONOL SYNTHASE 2 (FLS2)		1.18129	0.0227589		0.0268794	0.998915		-0.0214982	0.999977		0.395555		UP	-	-	-		-	-	not reported	-
ATCG00470	ATPase epsilon subunit protein_coding ATP SYNTHASE EPSILON CHAIN (ATPE) ATP SYNTHASE EPSILON CHAIN (ATPE)		0.820021	0.0240408		0.218914	0.739161		0.145012	0.999977		0.394649		UP	-	-	-		-	-	not reported	-
AT5G21130	Late embryogenesis abundant (LEA) hydroxyproline-rich glycoprotein family;(source:Araport11) protein_coding		0.627648	0.0376252		0.116148	0.900305		0.4379	0.355999		0.393899		UP	-	-	-		-	-	not reported	-
AT1G08860	Encodes a copine-like protein, which is a member of a newly identified class of calcium-dependent, phospholipid binding proteins that are present in a wide range of organisms. Overexpression of this gene suppresses bon1-1 phenotypes. Double mutant analyses with bon1-1 suggest that BON1 and BON3 have overlapping functions in maintaining cellular homeostasis and inhibiting cell death. protein_codin…		1.16096	0.00429271		0.0291641	0.998915		-0.00994189	0.999977		0.393395		UP	-	-	-		-	-	not reported	-
AT3G10840	alpha/beta-Hydrolases superfamily protein;(source:Araport11) protein_coding		1.41645	7.83e-05		-0.160175	0.706702		-0.0815327	0.999977		0.391579		UP	-	-	-		-	-	not reported	-
AT5G03970	F-box associated ubiquitination effector family protein;(source:Araport11) protein_coding		0.790634	0.000357733		0.0454397	0.96032		0.334881	0.142969		0.390318		UP	-	-	-		-	-	not reported	-
AT3G18300	hypothetical protein;(source:Araport11) protein_coding		0.871421	0.00301461		0.144207	0.786705		0.153009	0.999977		0.389546		UP	-	-	-		-	-	not reported	-
AT1G23360	Encodes a 2-phytyl-1,4-naphthoquinone methyltransferase that catalyzes the final step in phylloquinone (vitamin K1) biosynthesis. protein_coding (MENG) (MENG)		0.645415	0.00595411		0.449387	0.0474628		0.069999	0.999977		0.388267		UP	-	-	-		-	-	not reported	-
AT3G25890	encodes a member of the ERF (ethylene response factor) subfamily B-6 of ERF/AP2 transcription factor family. The protein contains one AP2 domain. There are 12 members in this subfamily including RAP2.11. The mRNA is cell-to-cell mobile. protein_coding CYTOKININ RESPONSE FACTOR 11 (CRF11) CYTOKININ RESPONSE FACTOR 11 (CRF11)		0.644987	0.025874		0.241109	0.559514		0.275885	0.714586		0.387327		UP	-	-	-		-	-	not reported	TF
AT4G35720	DUF241 domain protein, putative (DUF241);(source:Araport11) protein_coding		1.07519	0.0350707		0.0949021	0.989815		-0.00832111	0.999977		0.387256		UP	-	-	-		-	YES	no	-
AT5G36870	encodes a gene similar to callose synthase protein_coding GLUCAN SYNTHASE-LIKE 9 (GSL09) GLUCAN SYNTHASE-LIKE 9 (GSL09); (atgsl9); (gsl09);GLUCAN SYNTHASE-LIKE 9 (ATGSL09)		1.29624	0.000129569		0.125546	0.810677		-0.260161	0.611852		0.387209		UP	-	-	-		-	-	not reported	-
AT5G58840	Subtilase family protein;(source:Araport11) protein_coding		1	0.0188762		0.193639	0.846836		-0.0321616	0.999977		0.387159		UP	-	-	-		-	-	not reported	-
AT2G22060	galactose oxidase/kelch repeat protein;(source:Araport11) protein_coding		1.29248	0.00124919		0.00864967	0.998933		-0.140904	0.999977		0.386742		UP	-	-	-		-	-	not reported	-
AT1G21210	cell wall-associated ser/thr kinase involved in cell elongation and lateral root development protein_coding WALL ASSOCIATED KINASE 4 (WAK4) WALL ASSOCIATED KINASE 4 (WAK4)		0.874561	0.00985286		0.248487	0.614251		0.034519	0.999977		0.385856		UP	-	-	-		-	-	not reported	-
AT1G47340	F-box and associated interaction domains-containing protein;(source:Araport11) protein_coding		0.530217	0.0135485		0.279592	0.219986		0.346001	0.245491		0.38527		UP	-	-	-		-	-	not reported	-
AT1G20520	DUF241 domain protein, putative (DUF241);(source:Araport11) protein_coding		0.958769	0.000661566		0.177897	0.603371		0.0184251	0.999977		0.38503		UP	-	-	-		-	-	not reported	-
AT2G33310	Auxin induced gene, IAA13 (IAA13). protein_coding AUXIN-INDUCED PROTEIN 13 (IAA13) AUXIN-INDUCED PROTEIN 13 (IAA13)		0.707374	0.00425113		0.348469	0.142019		0.0986499	0.999977		0.384831		UP	-	-	-		-	-	not reported	-
AT3G26330	putative cytochrome P450 protein_coding "CYTOCHROME P450, FAMILY 71, SUBFAMILY B, POLYPEPTIDE 37" (CYP71B37) "CYTOCHROME P450, FAMILY 71, SUBFAMILY B, POLYPEPTIDE 37" (CYP71B37)		0.71057	0.00670334		0.429659	0.091602		0.0130092	0.999977		0.384413		UP	-	-	-		-	-	not reported	-
AT3G09150	Required for biosynthesis of the tetrapyrrole phytochrome chromophore phytochromobilin. Encodes phytochromobilin synthase, a ferredoxin-dependent biliverdin reductase. It is necessary for coupling the expression of some nuclear genes to the functional state of the chloroplast. protein_coding ELONGATED HYPOCOTYL 2 (HY2) ELONGATED HYPOCOTYL 2 (HY2);GENOMES UNCOUPLED 3 (GUN3)		0.725331	0.0120437		0.0743152	0.96032		0.351855	0.468557		0.383833		UP	-	-	-		-	-	not reported	-
AT2G29000	Leucine-rich repeat protein kinase family protein;(source:Araport11) protein_coding		1.08366	0.000665049		0.082434	0.931322		-0.0164388	0.999977		0.383218		UP	-	-	-		-	-	not reported	-
AT2G27290	FAM210B-like protein, putative (DUF1279);(source:Araport11) protein_coding		0.636894	0.00280309		0.120327	0.712757		0.389642	0.118012		0.382287		UP	-	-	-		-	-	not reported	-
AT2G46640	Encodes TAC1 (Tiller Angle Control 1). Influences axillary branch growth angle. Inflorescence stems of TAC1 mutants are vertically oriented and have axillary shoots with narrow branch angles. protein_coding TILLER ANGLE CONTROL 1 (TAC1) TILLER ANGLE CONTROL 1 (TAC1)		1.29248	0.00568818		-0.129096	0.943401		-0.016562	0.999977		0.382274		UP	-	-	-		-	YES	not detected	-
AT3G60490	encodes a member of the DREB subfamily A-4 of ERF/AP2 transcription factor family. The protein contains one AP2 domain. There are 17 members in this subfamily including TINY. protein_coding ETHYLENE-RESPONSIVE TRANSCRIPTION FACTOR 35 (ERF35) ETHYLENE-RESPONSIVE TRANSCRIPTION FACTOR 35 (ERF35)		1.11439	0.0262084		-0.315509	0.715495		0.345463	0.97431		0.381448		UP	-	-	-		-	-	not reported	TF
AT1G34180	NAC domain containing protein 16;(source:Araport11) protein_coding NAC DOMAIN CONTAINING PROTEIN 16 (NAC016) NAC DOMAIN CONTAINING PROTEIN 16 (NAC016);NAC DOMAIN CONTAINING PROTEIN 16 (anac016)		1.02679	0.0231346		0.333509	0.631691		-0.217868	0.999977		0.38081		UP	-	-	-		-	-	not reported	-
AT5G39860	Encodes PRE1 (PACLOBUTRAZOL RESISTANCE1). PRE1 and IBH1 form a pair of antagonistic HLH/bHLH transcription factors that function downstream of BZR1 to mediate brassinosteroid regulation of cell elongation. BNQ1 is directly and negatively regulated by AP3 and PI in petals.Required for appropriate regulation of flowering time. protein_coding PACLOBUTRAZOL RESISTANCE1 (PRE1) BASIC HELIX-LOOP-HELIX P…		1.29248	0.000902947		-0.128131	0.887279		-0.02248	0.999977		0.380623		UP	-	-	-		-	-	not reported	-
AT2G17860	Pathogenesis-related thaumatin superfamily protein;(source:Araport11) protein_coding		1.08496	0.00152744		0.0725057	0.968818		-0.0162094	0.999977		0.38042		UP	-	-	-		-	-	not reported	-
AT5G64250	Aldolase-type TIM barrel family protein;(source:Araport11) protein_coding		0.928311	0.00266254		-0.092739	0.925055		0.303288	0.581886		0.37962		UP	-	-	-		-	-	not reported	-
AT4G03930	Plant invertase/pectin methylesterase inhibitor superfamily;(source:Araport11) protein_coding (PME42) (PME42)		1.19616	0.016948		0.0521107	0.998915		-0.109651	0.999977		0.37954		UP	-	-	-		-	-	not reported	-
AT1G65700	Small nuclear ribonucleoprotein family protein;(source:Araport11) protein_coding SM-LIKE 8 (LSM8) (ATLSM8);SM-LIKE 8 (LSM8)		0.93778	0.00603665		0.0791547	0.968456		0.120559	0.999977		0.379165		UP	-	-	-		-	-	not reported	-
AT5G48220	Aldolase-type TIM barrel family protein;(source:Araport11) protein_coding		0.586221	0.0133869		0.169207	0.636082		0.374197	0.260563		0.376541		UP	-	-	-		-	-	not reported	-
AT3G01440	Encodes a subunit of the NAD(P)H complex located in the chloroplast thylakoid lumen. protein_coding PHOTOSYNTHETIC NDH SUBCOMPLEX L 3 (PnsL3) PSBQ-LIKE 1 (PQL1);PHOTOSYNTHETIC NDH SUBCOMPLEX L 3 (PnsL3);PSBQ-LIKE 2 (PQL2)		1	0.000194104		0.145716	0.637965		-0.0188353	0.999977		0.375627		UP	-	-	-		-	-	not reported	-
AT5G37560	RING/U-box superfamily protein;(source:Araport11) protein_coding		1.45345	0.0121		-0.308147	0.785885		-0.0226555	0.999977		0.374214		UP	-	-	-		-	-	not reported	-
AT3G28840	hypothetical protein (DUF1216);(source:Araport11) protein_coding		1.29248	0.00434408		-0.170803	0.877195		-0.00045736	0.999977		0.37374		UP	-	-	-		-	-	not reported	-
AT5G52850	Pentatricopeptide repeat (PPR) superfamily protein;(source:Araport11) protein_coding		0.518557	0.044745		0.0974254	0.90628		0.504852	0.149533		0.373611		UP	-	-	-		-	-	not reported	-
AT1G79250	AGC kinase 1.7;(source:Araport11) protein_coding AGC KINASE 1.7 (AGC1.7) AGC KINASE 1.7 (AGC1.7)		0.721496	0.0230442		0.338103	0.377347		0.0603839	0.999977		0.373328		UP	-	-	-		-	-	not reported	-
AT5G27730	heparan-alpha-glucosaminide N-acetyltransferase-like protein (DUF1624);(source:Araport11) protein_coding		1.36666	0.00018442		-0.12436	0.846968		-0.123817	0.999977		0.372827		UP	-	-	-		-	-	not reported	-
AT1G06320	hypothetical protein;(source:Araport11) protein_coding		0.60564	0.0349811		0.38502	0.22492		0.123335	0.999977		0.371332		UP	-	-	-		-	-	not reported	-
AT1G17710	Encodes a phosphoethanolamine/phosphocholine phosphatase. It is likely to be involved in the liberation of inorganic phosphate from intracellular sources. Expression is upregulated in the shoot of cax1/cax3 mutant. protein_coding PHOSPHOETHANOLAMINE/PHOSPHOCHOLINE PHOSPHATASE 1 (PEPC1) (ATPEPC1);PHOSPHOETHANOLAMINE/PHOSPHOCHOLINE PHOSPHATASE 1 (PEPC1);ARABIDOPSIS THALIANA PHOSPHOETHANOLAMINE/PHOS…		1.23697	0.00616372		-0.102261	0.971652		-0.0216241	0.999977		0.371027		UP	-	-	-		-	-	not reported	-
AT5G05350	PLAC8 family protein;(source:Araport11) protein_coding		1.17035	0.00489414		-0.0489652	0.998915		-0.00865089	0.999977		0.370911		UP	-	-	-		-	-	not reported	-
AT1G52220	CURVATURE THYLAKOID protein;(source:Araport11) protein_coding CURVATURE THYLAKOID 1C (CURT1C) CURVATURE THYLAKOID 1C (CURT1C)		1.10772	0.00954656		0.0161511	0.998915		-0.0114766	0.999977		0.370798		UP	-	-	-		-	-	not reported	-
AT2G01870	transmembrane protein;(source:Araport11) protein_coding		1.08701	0.0185849		0.0291081	0.998915		-0.00653323	0.999977		0.369863		UP	-	-	-		-	-	not reported	-
AT2G03180	hypothetical protein;(source:Araport11) protein_coding		1.29248	0.0140077		-0.164529	0.930106		-0.0207643	0.999977		0.369063		UP	-	-	-		-	-	not reported	-
AT5G61070	Encodes a protein with similarity to histone deacetylases, a class of chromatin remodeling factors which act on H3/H4 histones. Expressed in roots where it appears to regulate the expression of epidermal cell fate genes controlling hair cell differentiation. protein_coding HISTONE DEACETYLASE OF THE RPD3/HDA1 SUPERFAMILY 18 (HDA18) HISTONE DEACETYLASE OF THE RPD3/HDA1 SUPERFAMILY 18 (HDA18);A. TH…		1.34091	0.0309513		-0.219833	0.91811		-0.0141619	0.999977		0.368972		UP	-	-	-		-	-	not reported	-
AT1G21600	Present in transcriptionally active plastid chromosomes. Involved in plastid gene expression. protein_coding PLASTID TRANSCRIPTIONALLY ACTIVE 6 (PTAC6) PLASTID TRANSCRIPTIONALLY ACTIVE 6 (PTAC6)		0.548092	0.0267943		0.218584	0.520473		0.337516	0.395792		0.368064		UP	-	-	-		-	-	not reported	-
AT4G10410	Leucine-rich repeat (LRR) family protein;(source:Araport11) protein_coding		1	2.4e-05		0.11563	0.607434		-0.0116146	0.999977		0.368005		UP	-	-	-		-	-	not reported	-
AT1G55200	kinase with adenine nucleotide alpha hydrolases-like domain-containing protein;(source:Araport11) protein_coding		0.910868	0.0201131		0.169619	0.860737		0.023418	0.999977		0.367968		UP	-	-	-		-	-	not reported	-
AT3G26600	Armadillo repeat protein. One of a family of four in Arabidopsis. Expressed in vegetative tissues, anthers and ovules. protein_coding ARMADILLO REPEAT ONLY 4 (ARO4) ARMADILLO REPEAT ONLY 4 (ARO4)		0.584058	0.00991843		0.0470302	0.982493		0.47124	0.0946229		0.367443		UP	-	-	-		-	-	not reported	-
AT4G20160	golgin family A protein;(source:Araport11) protein_coding		0.899733	0.000131536		0.217771	0.246716		-0.0153349	0.999977		0.367389		UP	-	-	-		-	-	not reported	-
AT5G01670	NAD(P)-linked oxidoreductase superfamily protein;(source:Araport11) protein_coding		0.714422	0.0173732		-0.18267	0.724389		0.570099	0.146613		0.367283		UP	-	-	-		-	-	not reported	-
AT5G39220	alpha/beta-Hydrolases superfamily protein;(source:Araport11) protein_coding		1.21255	0.003872		-0.134044	0.918578		0.0224918	0.999977		0.366998		UP	-	-	-		-	-	not reported	-
AT4G17070	peptidyl-prolyl cis-trans isomerase;(source:Araport11) protein_coding		0.52767	0.0207211		0.0448947	0.986957		0.527702	0.0683423		0.366756		UP	-	-	-		-	-	not reported	-
AT3G09750	Galactose oxidase/kelch repeat superfamily protein;(source:Araport11) protein_coding		1.08496	0.00594393		0.0273697	0.998915		-0.014164	0.999977		0.366056		UP	-	-	-		-	-	not reported	-
AT1G09080	Heat shock protein 70 (Hsp 70) family protein;(source:Araport11) protein_coding BINDING PROTEIN 3 (BIP3) BINDING PROTEIN 3 (BIP3)		1.67396	0.00302085		-0.464958	0.492439		-0.111871	0.999977		0.365711		UP	-	-	-		-	YES	no	-
AT1G73320	S-adenosyl-L-methionine-dependent methyltransferases superfamily protein;(source:Araport11) protein_coding		0.587192	0.0358452		0.221178	0.600136		0.287122	0.655491		0.365164		UP	-	-	-		-	-	not reported	-
AT1G22015	Galactosyltransferase family protein;(source:Araport11) protein_coding (DD46) (DD46)		1	0.000466312		0.109031	0.833728		-0.0137992	0.999977		0.365077		UP	-	-	-		-	-	not reported	-
AT1G68560	Encodes a bifunctional alpha-l-arabinofuranosidase/beta-d-xylosidase that belongs to family 3 of glycoside hydrolases. protein_coding ALPHA-XYLOSIDASE 1 (XYL1) ALTERED XYLOGLUCAN 3 (AXY3); (TRG1);THERMOINHIBITION RESISTANT GERMINATION 1 (TRG1);ALPHA-XYLOSIDASE 1 (XYL1);ALPHA-XYLOSIDASE 1 (ATXYL1); (GH31)		0.66776	0.0386979		0.013204	0.998915		0.412308	0.465696		0.364424		UP	-	-	-		-	-	not reported	-
AT4G00130	DNA-binding storekeeper protein-related transcriptional regulator;(source:Araport11) protein_coding		1.55502	0.000308874		-0.00286923	0.9993		-0.460124	0.38002		0.364009		UP	-	-	-		-	-	not reported	-
AT1G72760	Protein kinase superfamily protein;(source:Araport11) protein_coding		1.1112	0.00103295		0.000179967	0.999885		-0.0205865	0.999977		0.363597		UP	-	-	-		-	-	not reported	-
AT3G02500	mental retardation GTPase activating protein;(source:Araport11) protein_coding		1.12326	0.000440359		-0.0100492	0.998915		-0.0262114	0.999977		0.362333		UP	-	-	-		-	-	not reported	-
AT3G21250	member of MRP subfamily protein_coding ATP-BINDING CASSETTE C8 (ABCC8) ATP-BINDING CASSETTE C8 (ABCC8);MULTIDRUG RESISTANCE-ASSOCIATED PROTEIN 6 (MRP6)		0.509124	0.0417725		0.190058	0.625655		0.38554	0.309025		0.361574		UP	-	-	-		-	-	not reported	-
AT1G14270	CAAX amino terminal protease family protein;(source:Araport11) protein_coding		1.0222	0.0304768		0.0786989	0.994622		-0.0164297	0.999977		0.361489		UP	-	-	-		-	YES	no	-
AT4G04450	member of WRKY Transcription Factor; Group II-b protein_coding (WRKY42) (AtWRKY42); (WRKY42)		1.23244	0.0400614		0.0639741	0.998915		-0.212727	0.999977		0.36123		UP	-	-	-		-	-	not reported	-
AT1G22490	basic helix-loop-helix (bHLH) DNA-binding superfamily protein;(source:Araport11) protein_coding (BHLH094) (BHLH094); (BHLH94)		0.826038	0.00160898		0.290004	0.246003		-0.032644	0.999977		0.361133		UP	-	-	-		-	-	not reported	-
AT3G10010	Encodes a protein with DNA glycosylase activity that is involved in maintaining methylation marks. protein_coding DEMETER-LIKE 2 (DML2) DEMETER-LIKE 2 (DML2)		0.798016	0.0209967		0.00905073	0.998933		0.275681	0.86007		0.360916		UP	-	-	-		-	-	not reported	-
AT1G49560	Homeodomain-like superfamily protein;(source:Araport11) protein_coding HRS1 HOMOLOG6 (HHO6) HRS1 HOMOLOG6 (HHO6)		0.928443	0.00266254		-0.161545	0.755305		0.313955	0.551168		0.360284		UP	-	-	-		-	-	not reported	-
AT1G80760	Encodes a protein with boron transporter activity. It helps to preferentially direct boron to young developing tissues in the shoot, such as immature leaves, under low boron conditions. This boron channel appears to be impermeable to water, unlike the closely related NIP5;1 boron transporter. This protein also allows the transport of glycerol, urea, and formimide but not larger uncharged solutes …		0.695607	0.0184651		0.158647	0.788346		0.225419	0.891264		0.359891		UP	-	-	-		-	-	not reported	-
AT4G14870	Encodes a component of the thylakoid-localized Sec system involved in the translocation of cytoplasmic proteins into plastid. The mRNA is cell-to-cell mobile. protein_coding (SECE1) (SECE1)		0.913372	0.0100462		0.0866088	0.965366		0.0783295	0.999977		0.359437		UP	-	-	-		-	-	not reported	-
AT4G27980	trichohyalin-like protein (DUF3444);(source:Araport11) protein_coding		1.12396	0.000232241		0.0102818	0.998915		-0.0572214	0.999977		0.359008		UP	-	-	-		-	-	not reported	-
AT5G20420	Involved in gene silencing. Locus-specific regulator of 24nt-siRNA expression, works together with CLSY1-4 as the master regulators of essentially all Pol-IV-dependent 24nt-siRNAs. protein_coding CHROMATIN REMODELING 42 (CHR42) CLASSY2 (CLSY2);CHROMATIN REMODELING 42 (CHR42)		1.32023	0.000856064		-0.237458	0.642524		-0.00679956	0.999977		0.358657		UP	-	-	-		YES	-	not reported	-
AT1G34245	Encodes a secretory peptide EPF2 expressed in proliferating cells of the stomatal lineage, known as meristemoids, and in guard mother cells, the progenitors of stomata. Controls asymmetric cell divisions during stomatal development. EPF2 is related to EPF1, also involved in stomatal development. Its transcript levels change after inducing MUTE expression in a mute background. EPF2 binds to the ER…		1.22972	0.00567765		-0.137497	0.927263		-0.023776	0.999977		0.356148		UP	-	-	-		-	YES	no	-
AT1G68080	2-oxoglutarate (2OG) and Fe(II)-dependent oxygenase superfamily protein;(source:Araport11) protein_coding		1.10921	0.00122219		-0.000445533	0.999445		-0.046745	0.999977		0.354007		UP	-	-	-		-	-	not reported	-
AT4G14660	Non-catalytic subunit specific to DNA-directed RNA polymerase V; homologous to budding yeast RPB7 protein_coding (NRPE7) (NRPE7)		0.650894	0.0182745		0.0108009	0.998915		0.395651	0.342336		0.352449		UP	-	-	-		-	-	not reported	-
AT1G54850	HSP20-like chaperones superfamily protein;(source:Araport11) protein_coding		0.672052	0.00476957		0.160646	0.638283		0.223993	0.652902		0.35223		UP	-	-	-		-	-	not reported	-
AT3G16500	phytochrome-associated protein 1 (PAP1) protein_coding PHYTOCHROME-ASSOCIATED PROTEIN 1 (PAP1) INDOLE-3-ACETIC ACID INDUCIBLE 26 (IAA26);PHYTOCHROME-ASSOCIATED PROTEIN 1 (PAP1)		0.575778	0.0419777		0.469335	0.114936		0.0108671	0.999977		0.351994		UP	-	-	-		-	-	not reported	-
AT5G52390	PAR1 protein;(source:Araport11) protein_coding		1.04977	0.00180168		0.0624025	0.983421		-0.0565432	0.999977		0.351876		UP	-	-	-		-	-	not reported	-
AT4G32630	ArfGap/RecO-like zinc finger domain-containing protein;(source:Araport11) protein_coding		1	5.47e-05		0.0641588	0.898368		-0.00907052	0.999977		0.351696		UP	-	-	-		-	-	not reported	-
AT1G75290	encodes a protein whose sequence is similar to an isoflavone reductase protein_coding		1.14227	0.0259825		-0.148588	0.948165		0.0583565	0.999977		0.35068		UP	-	-	-		-	-	not reported	-
AT5G10880	tRNA synthetase-related / tRNA ligase-like protein;(source:Araport11) protein_coding		1	0.00040295		0.0587392	0.96032		-0.0067108	0.999977		0.350676		UP	-	-	-		-	-	not reported	-
AT3G59000	F-box/RNI-like superfamily protein;(source:Araport11) protein_coding		0.678072	0.0247112		0.109866	0.909334		0.257225	0.813676		0.348388		UP	-	-	-		-	-	not reported	-
AT2G25690	DUF581 family protein, putative (DUF581);(source:Araport11) protein_coding		0.795757	0.0135021		0.0112887	0.998915		0.237672	0.906612		0.348239		UP	-	-	-		-	-	not reported	-
AT1G16530	ASYMMETRIC LEAVES 2-like 9;(source:Araport11) protein_coding ASYMMETRIC LEAVES 2-LIKE 9 (ASL9) LOB DOMAIN-CONTAINING PROTEIN 3 (LBD3);ASYMMETRIC LEAVES 2-LIKE 9 (ASL9)		1.04123	0.0221108		0.00384053	0.9993		-0.000442103	0.999977		0.34821		UP	-	-	-		-	-	not reported	-
AT1G33813	transposable_element_gene;(source:Araport11);copia-like retrotransposon family, has a 5.8e-39 P-value blast match to gb|AAO73529.1| gag-pol polyprotein (Glycine max) (SIRE1) (Ty1_Copia-family);(source:TAIR10) transposable_element_gene		1.06464	0.00182574		0.0625062	0.984315		-0.0826683	0.999977		0.34816		UP	-	-	-		-	-	not reported	-
AT1G31760	SWIB/MDM2 domain superfamily protein;(source:Araport11) protein_coding SWI/SNF PROTEIN COMPLEX B5 (SWIB5) SWI/SNF PROTEIN COMPLEX B5 (SWIB5)		0.748397	0.0344147		-0.0473423	0.998429		0.342196	0.71058		0.34775		UP	-	-	-		-	-	not reported	-
AT5G14380	Encodes an arabinogalactan protein that is expressed in pollen, pollen sac and pollen tube. Loss of AGP6 function results in decreased fertility due to defects in pollen tube growth. protein_coding ARABINOGALACTAN PROTEIN 6 (AGP6) ARABINOGALACTAN PROTEIN 6 (AGP6)		1.04977	0.0225006		0.0110713	0.998933		-0.0176148	0.999977		0.347741		UP	-	-	-		-	-	not reported	-
AT1G72110	O-acyltransferase (WSD1-like) family protein;(source:Araport11) protein_coding		1	0.00191038		0.0539222	0.988137		-0.0107388	0.999977		0.347728		UP	-	-	-		-	-	not reported	-
AT2G36630	Sulfite exporter TauE/SafE family protein;(source:Araport11) protein_coding		1.09433	0.00019379		-0.0358424	0.99465		-0.017676	0.999977		0.346937		UP	-	-	-		-	-	not reported	-
AT3G19700	Encodes leucine rich repeat (LRR) kinase. Iku2-3 identified in a screen for mutants with abnormal endosperm. Sporophytic recessive mutants have reduced embryo and endosperm size. Seed size is also reduced and the shape is abnormal suggesting an interaction between the endosperm and cell elongation in the integuments. protein_coding HAIKU2 (IKU2) HAIKU2 (IKU2)		1.20615	0.0107845		-0.057368	0.998915		-0.108111	0.999977		0.346891		UP	-	-	-		-	YES	not detected	-
AT1G61440	S-locus lectin protein kinase family protein;(source:Araport11) protein_coding		1.35712	0.000665169		-0.215639	0.685784		-0.101272	0.999977		0.346737		UP	-	-	-		-	-	not reported	-
AT1G67470	Protein kinase superfamily protein;(source:Araport11) protein_coding (ZRK12) (ZRK12)		0.839065	0.015541		0.420859	0.26915		-0.22118	0.999977		0.346248		UP	-	-	-		-	-	not reported	-
AT2G24255	LOW protein: F-box/kelch-repeat protein;(source:Araport11) protein_coding		1	6.22e-05		0.0408061	0.973056		-0.00349199	0.999977		0.345771		UP	-	-	-		-	-	not reported	-
AT1G52310	protein kinase family protein / C-type lectin domain-containing protein;(source:Araport11) protein_coding		0.635306	0.0105855		0.152495	0.709783		0.24902	0.633919		0.345607		UP	-	-	-		-	-	not reported	-
AT2G04800	hypothetical protein;(source:Araport11) protein_coding		0.529195	0.0163584		0.356488	0.11195		0.147897	0.977851		0.344526		UP	-	-	-		-	-	not reported	-
AT5G28300	Encodes a Ca(2+)-dependent CaM-binding protein. AtGT2L specifically targets the nucleus and possesses both transcriptional activation and DNA-binding abilities, implicating its function as a nuclear transcription factor. protein_coding GT-2LIKE PROTEIN (GT2L) (ATGT2L);GT-2LIKE PROTEIN (GT2L)		0.587219	0.00923521		0.428416	0.0540112		0.0164063	0.999977		0.344014		UP	-	-	-		-	YES	no	-
AT4G29610	Cytidine/deoxycytidylate deaminase family protein;(source:Araport11) protein_coding		0.936291	0.0124248		0.0997861	0.955148		-0.00484226	0.999977		0.343745		UP	-	-	-		YES	-	not reported	-
AT5G13180	Encodes a NAC domain transcription factor that interacts with VND7 and negatively regulates xylem vessel formation. protein_coding NAC DOMAIN CONTAINING PROTEIN 83 (NAC083) NAC DOMAIN CONTAINING PROTEIN 83 (ANAC083);NAC DOMAIN CONTAINING PROTEIN 83 (NAC083);VND-INTERACTING 2 (VNI2)		0.712294	0.0044822		0.228325	0.438239		0.0877362	0.999977		0.342785		UP	-	-	-		-	YES	no	-
AT4G21960	Encodes AT4g21960 (AT4g21960/T8O5_170). The mRNA is cell-to-cell mobile. protein_coding (PRXR1) (PRXR1)		0.608196	0.00260566		0.271771	0.150438		0.148118	0.838059		0.342695		UP	-	-	-		-	-	not reported	-
AT3G11480	The gene encodes a SABATH methyltransferase that methylates both salicylic acid and benzoic acid. It is highly expressed in flowers, induced by biotic and abiotic stress and thought to be involved in direct defense mechanism. protein_coding (BSMT1) (ATBSMT1); (BSMT1)		1	0.000238597		0.0391844	0.988153		-0.0120632	0.999977		0.342374		UP	-	-	-		-	-	not reported	-
AT3G56710	Sig1 binding protein; interacts with Sig1R4. As well as Sig1, SibI is imported into chloroplasts and its expression is light-dependent in mature chloroplasts. protein_coding SIGMA FACTOR BINDING PROTEIN 1 (SIB1) SIGMA FACTOR BINDING PROTEIN 1 (SIB1)		1.03841	0.0156129		0.229757	0.787504		-0.246572	0.999977		0.340531		UP	-	-	-		-	-	not reported	-
AT2G21195	hypothetical protein;(source:Araport11) protein_coding		0.581028	0.0483789		0.175718	0.755407		0.263068	0.788692		0.339938		UP	-	-	-		-	-	not reported	-
AT3G29090	Encodes an atypical pectin methylesterase that does not require salt for its activity and has a blockwise mode of pectin demethylesterification. protein_coding PECTIN METHYLESTERASE 31 (PME31) A. THALIANA PECTIN METHYLESTERASE 31 (ATPME31);PECTIN METHYLESTERASE 31 (PME31)		0.639044	0.0310588		-0.0373037	0.998915		0.416035	0.377222		0.339259		UP	-	-	-		-	-	not reported	-
AT2G05000	transposable_element_gene;(source:Araport11);similar to unknown protein [Arabidopsis thaliana] (TAIR:AT3G47320.1);(source:TAIR10) transposable_element_gene		1	0.000593191		0.0716548	0.938217		-0.0547758	0.999977		0.33896		UP	-	-	-		-	-	not reported	-
AT5G52970	thylakoid lumen 15.0 kDa protein;(source:Araport11) protein_coding		1.0222	0.00095512		0.00630227	0.998933		-0.0119977	0.999977		0.338834		UP	-	-	-		-	-	not reported	-
AT1G53230	Encodes a member of a recently identified plant transcription factor family that includes Teosinte branched 1, Cycloidea 1, and proliferating cell nuclear antigen (PCNA) factors, PCF1 and 2. Regulated by miR319. Involved in heterochronic regulation of leaf differentiation. protein_coding TEOSINTE BRANCHED 1, CYCLOIDEA AND PCF TRANSCRIPTION FACTOR 3 (TCP3) TEOSINTE BRANCHED 1, CYCLOIDEA AND PCF TR…		0.956932	0.000189875		0.0817067	0.865216		-0.0235305	0.999977		0.33837		UP	-	-	-		-	-	not reported	-
AT1G75590	SAUR-like auxin-responsive protein family;(source:Araport11) protein_coding SMALL AUXIN UPREGULATED RNA 52 (SAUR52) SMALL AUXIN UPREGULATED RNA 52 (SAUR52)		0.693168	0.00508211		0.302821	0.228495		0.0185521	0.999977		0.33818		UP	-	-	-		-	YES	YES	-
AT4G39510	member of CYP96A protein_coding "CYTOCHROME P450, FAMILY 96, SUBFAMILY A, POLYPEPTIDE 12" (CYP96A12) "CYTOCHROME P450, FAMILY 96, SUBFAMILY A, POLYPEPTIDE 12" (CYP96A12)		0.815838	0.00230983		0.248043	0.39277		-0.050459	0.999977		0.337807		UP	-	-	-		-	-	not reported	-
AT1G14440	homeobox protein 31;(source:Araport11) protein_coding HOMEOBOX PROTEIN 31 (HB31) HOMEOBOX PROTEIN 31 (AtHB31);HOMEOBOX PROTEIN 31 (HB31);ZINC FINGER HOMEODOMAIN 4 (ZHD4);FLORAL TRANSITION AT THE MERISTEM2 (FTM2)		1.02945	0.0322566		-0.00392877	0.9993		-0.0167694	0.999977		0.33625		UP	-	-	-		-	-	not reported	-
AT4G14890	2Fe-2S ferredoxin-like superfamily protein;(source:Araport11) protein_coding FERREDOXIN C 1 (FdC1) FERREDOXIN C 1 (FdC1)		0.766134	0.00572812		0.242615	0.477362		-0.00114026	0.999977		0.335869		UP	-	-	-		-	-	not reported	-
ATCG00150	Encodes a subunit of ATPase complex CF0, which is a proton channel that supplies the proton motive force to drive ATP synthesis by CF1 portion of the complex. protein_coding (ATPI) (ATPI)		0.970806	0.0221498		0.0881783	0.984723		-0.051484	0.999977		0.335833		UP	-	-	-		-	-	not reported	-
AT2G28170	member of Putative Na+/H+ antiporter family protein_coding (ATCHX7) CATION/H+ EXCHANGER 7 (CHX7); (ATCHX7)		1	0.00142043		0.0330523	0.998915		-0.0262635	0.999977		0.335596		UP	-	-	-		-	-	not reported	-
AT5G14980	alpha/beta-Hydrolases superfamily protein;(source:Araport11) protein_coding (MAGL14) (MAGL14)		1	0.00022585		0.00618293	0.998933		-0.000755801	0.999977		0.335142		UP	-	-	-		-	-	not reported	-
AT2G29180	transmembrane protein;(source:Araport11) protein_coding		1.07792	0.00511678		-0.113857	0.931322		0.0409723	0.999977		0.33501		UP	-	-	-		-	-	not reported	-
AT5G63820	hypothetical protein (DUF626);(source:Araport11) protein_coding		1.12428	6.24e-05		-0.114143	0.747839		-0.00571671	0.999977		0.334806		UP	-	-	-		-	-	not reported	-
AT3G48200	transmembrane protein;(source:Araport11) protein_coding		1.02764	0.0226302		-0.0124109	0.998933		-0.0126218	0.999977		0.334203		UP	-	-	-		-	-	not reported	-
AT5G14910	Heavy metal transport/detoxification superfamily protein;(source:Araport11) protein_coding		0.516182	0.0189906		0.0597129	0.95513		0.421687	0.144309		0.332527		UP	-	-	-		-	-	not reported	-
AT4G30360	member of Cyclic nucleotide gated channel family protein_coding CYCLIC NUCLEOTIDE-GATED CHANNEL 17 (CNGC17) CYCLIC NUCLEOTIDE-GATED CHANNEL 17 (CNGC17);CYCLIC NUCLEOTIDE-GATED CHANNEL 17 (ATCNGC17)		0.530259	0.0270098		0.137422	0.765836		0.32881	0.390692		0.332164		UP	-	-	-		YES	YES	no	-
AT3G24220	A member of gene NCED-related gene family, encodes 9-cis-epoxycarotenoid dioxygenase, a key enzyme in the biosynthesis of abscisic acid. The expression of this gene declines during the first 12h of imbibition. protein_coding NINE-CIS-EPOXYCAROTENOID DIOXYGENASE 6 (NCED6) NINE-CIS-EPOXYCAROTENOID DIOXYGENASE 6 (ATNCED6);NINE-CIS-EPOXYCAROTENOID DIOXYGENASE 6 (NCED6)		1	0.000129583		0.0111962	0.998915		-0.0150316	0.999977		0.332055		UP	-	-	-		-	-	not reported	-
AT3G43790	zinc induced facilitator-like 2;(source:Araport11) protein_coding ZINC INDUCED FACILITATOR-LIKE 2 (ZIFL2) ZINC INDUCED FACILITATOR-LIKE 2 (ZIFL2)		0.738219	0.022176		0.062312	0.987358		0.192314	0.999977		0.330948		UP	-	-	-		-	-	not reported	-
AT1G05410	CDPK adapter, putative (DUF1423);(source:Araport11) protein_coding		0.579024	0.0435554		0.0538728	0.989513		0.355567	0.496284		0.329488		UP	-	-	-		-	-	not reported	-
AT3G23260	F-box and associated interaction domains-containing protein;(source:Araport11) protein_coding		0.810744	0.0276447		0.098852	0.958734		0.0767213	0.999977		0.328772		UP	-	-	-		-	-	not reported	-
AT1G64810	Encodes a chloroplast localized RNA binding protein that is involved in group II intron splicing. Splicing defects can account for the loss of photosynthetic complexes in apo1 mutants. protein_coding ACCUMULATION OF PHOTOSYSTEM ONE 1 (APO1) ACCUMULATION OF PHOTOSYSTEM ONE 1 (APO1)		0.727788	0.0221256		-0.103606	0.927994		0.361041	0.549578		0.328408		UP	-	-	-		-	-	not reported	-
AT2G29630	Encodes a protein involved in thiamin biosynthesis. The protein is an iron-sulfur cluster protein predicted to catalyze the conversion of 5-aminoimidazole ribonucleotide (AIR) to hydroxymethylpyrimidine (HMP) or hydroxymethylpyrimidine phosphate (HMP-P). A severe reduction of THIC levels in plants decreases vitamin B1 (thiamin diphosphate (TPP)) levels and also leads to changes in the levels of n…		0.899633	0.0048352		-0.0989334	0.925055		0.181555	0.999977		0.327418		UP	-	-	-		-	-	not reported	-
AT5G40680	Galactose oxidase/kelch repeat superfamily protein;(source:Araport11) protein_coding		1	0.00479514		0.0215261	0.998915		-0.0398081	0.999977		0.327239		UP	-	-	-		-	-	not reported	-
AT4G14340	Phosphorylates serine or threonine residues that are near and C-terminal to acidic side chains on a variety of target proteins. Member of CKL gene family (CKL-C group). protein_coding CASEIN KINASE I (CKI1) CASEIN KINASE I-LIKE 11 (CKL11);CASEIN KINASE I (CKI1)		0.520635	0.0460649		-0.014106	0.998915		0.474384	0.19244		0.326971		UP	-	-	-		-	-	not reported	-
AT4G02200	Drought-responsive family protein;(source:Araport11) protein_coding		0.53044	0.0397894		0.190558	0.640046		0.259473	0.676716		0.326824		UP	-	-	-		-	-	not reported	-
AT1G18310	glycosyl hydrolase family 81 protein;(source:Araport11) protein_coding		1	0.00168948		-0.00194617	0.999367		-0.018254	0.999977		0.3266		UP	-	-	-		-	-	not reported	-
AT1G69990	Leucine-rich repeat protein kinase family protein;(source:Araport11) protein_coding		0.997942	0.000124463		-0.0594266	0.931322		0.0409182	0.999977		0.326478		UP	-	-	-		YES	YES	not detected	-
AT5G21105	Plant L-ascorbate oxidase;(source:Araport11) protein_coding		0.533536	0.0404545		0.100625	0.899665		0.344062	0.43566		0.326074		UP	-	-	-		-	-	not reported	-
AT3G15540	Primary auxin-responsive gene. Involved in the regulation stamen filaments development. protein_coding INDOLE-3-ACETIC ACID INDUCIBLE 19 (IAA19) MASSUGU 2 (MSG2);INDOLE-3-ACETIC ACID INDUCIBLE 19 (IAA19)		1.37277	0.000315004		-0.189848	0.70239		-0.20525	0.965276		0.325891		UP	-	-	-		-	-	not reported	-
AT1G15830	hypothetical protein;(source:Araport11) protein_coding		1.424	0.00143891		-0.169906	0.856705		-0.279252	0.938669		0.324947		UP	-	-	-		-	-	not reported	-
AT1G04420	NAD(P)-linked oxidoreductase superfamily protein;(source:Araport11) protein_coding		0.714842	0.00133405		0.086118	0.850686		0.171907	0.757831		0.324289		UP	-	-	-		-	-	not reported	-
AT3G50890	homeobox protein 28;(source:Araport11) protein_coding HOMEOBOX PROTEIN 28 (HB28) HOMEOBOX PROTEIN 28 (AtHB28);ZINC FINGER HOMEODOMAIN 7 (ZHD7);HOMEOBOX PROTEIN 28 (HB28)		1.09149	0.000497299		-0.101227	0.880922		-0.0175696	0.999977		0.324231		UP	-	-	-		-	-	not reported	-
AT1G73110	P-loop containing nucleoside triphosphate hydrolases superfamily protein;(source:Araport11) protein_coding		0.778041	0.0088306		0.180327	0.710148		0.0140486	0.999977		0.324139		UP	-	-	-		-	-	not reported	-
AT1G51460	ABCG13 encodes a member of the ATP-binding cassette (ABC) transporter family protein. Mutants show defects in petal elongation resulting in a folded petal phenotype. protein_coding ATP-BINDING CASSETTE G13 (ABCG13) FOLDED PETALS 2 (FOP2);ATP-BINDING CASSETTE G13 (ABCG13)		1.14005	0.00040295		-0.161262	0.709199		-0.00823676	0.999977		0.323518		UP	-	-	-		-	-	not reported	-
AT3G53180	Encodes a protein that is the product of a fusion gene with a C-terminal GSI like sequence and an N-terminal part sharing homology with nodulins. It self-assembles into oligomers and its expression is increased in response to flagellin treatment. The protein co-localizes with microtubules and binds gamma-tubulin. RNAi lines are affected in root morphogenesis. protein_coding NODULIN/GLUTAMINE SYNT…		0.540386	0.0108595		0.438825	0.0380108		-0.00893969	0.999977		0.323424		UP	-	-	-		-	-	not reported	-
AT5G52460	FBD, F-box and Leucine Rich Repeat domains containing protein;(source:Araport11) protein_coding EMBRYO SAC DEVELOPMENT ARREST 41 (EDA41) EMBRYO SAC DEVELOPMENT ARREST 41 (EDA41)		0.953445	0.0214361		0.0187477	0.998915		-0.00618666	0.999977		0.322002		UP	-	-	-		-	-	not reported	-
AT1G19650	Sec14p-like phosphatidylinositol transfer family protein;(source:Araport11) protein_coding		0.567936	0.0187132		0.324815	0.208541		0.073001	0.999977		0.321917		UP	-	-	-		-	-	not reported	-
AT3G53690	RING/U-box superfamily protein;(source:Araport11) protein_coding		1.02945	0.00280161		-0.0477757	0.996257		-0.0183727	0.999977		0.321099		UP	-	-	-		-	-	not reported	-
AT1G64360	SAQR is a clade specific protein present in single copy in Arabidopsis.It's expression is increased during light induced oxidative stress ,drought stress and also during senescence. Promoter contains two AGL15 binding sites. protein_coding ENESCENCE-ASSOCIATED AND QQS-RELATED (SAQR) ENESCENCE-ASSOCIATED AND QQS-RELATED (SAQR)		1	9.65e-05		-0.0135747	0.998915		-0.0249461	0.999977		0.320493		UP	-	-	-		-	-	not reported	-
AT3G11920	glutaredoxin-like protein;(source:Araport11) protein_coding		1	3.57e-05		-0.0317393	0.986919		-0.00872973	0.999977		0.319844		UP	-	-	-		-	-	not reported	-
AT5G62190	DEAD/DEAH box RNA helicase PRH75 protein_coding (PRH75) (ATRH7); (PRH75)		0.682789	0.0419777		0.0456422	0.998315		0.230884	0.984935		0.319772		UP	-	-	-		YES	-	not reported	-
AT2G47420	Encodes a putative rRNA dimethyltransferase. protein_coding ADENOSINE DIMETHYL TRANSFERASE 1A (DIM1A) ADENOSINE DIMETHYL TRANSFERASE 1A (DIM1A)		0.584027	0.047493		0.118306	0.888288		0.255296	0.815948		0.31921		UP	-	-	-		-	-	not reported	-
AT2G14620	xyloglucan endotransglucosylase/hydrolase 10;(source:Araport11) protein_coding XYLOGLUCAN ENDOTRANSGLUCOSYLASE/HYDROLASE 10 (XTH10) XYLOGLUCAN ENDOTRANSGLUCOSYLASE/HYDROLASE 10 (XTH10)		0.898195	0.00327169		0.00560413	0.9993		0.0527779	0.999977		0.318859		UP	-	-	-		-	-	not reported	-
AT1G31920	Tetratricopeptide repeat (TPR)-like superfamily protein;(source:Araport11) protein_coding		0.950232	0.00625295		0.0242482	0.998915		-0.0182731	0.999977		0.318736		UP	-	-	-		-	-	not reported	-
AT3G21570	proline-rich nuclear receptor coactivator;(source:Araport11) protein_coding		1	0.000403127		-0.0234004	0.998915		-0.0209347	0.999977		0.318555		UP	-	-	-		-	-	not reported	-
AT2G42190	rho GTPase-activating gacO-like protein;(source:Araport11) protein_coding		0.646997	0.0130585		0.171835	0.675741		0.135528	0.999977		0.31812		UP	-	-	-		-	-	not reported	-
AT1G77010	Pentatricopeptide repeat (PPR) superfamily protein;(source:Araport11) protein_coding		0.833497	0.0174529		0.0709048	0.984979		0.0496056	0.999977		0.318003		UP	-	-	-		-	-	not reported	-
AT4G22470	protease inhibitor/seed storage/lipid transfer protein (LTP) family protein;(source:Araport11) protein_coding		0.683794	0.0269046		0.409124	0.226969		-0.139624	0.999977		0.317765		UP	-	-	-		-	YES	YES	-
AT3G46370	Leucine-rich repeat protein kinase family protein;(source:Araport11) protein_coding		0.675249	0.00599093		0.300127	0.235812		-0.0221802	0.999977		0.317732		UP	-	-	-		-	-	not reported	-
AT2G22660	Encodes a member of a family of DUF1399 domain containing proteins. GRDP1 is involved in germination and response to ABA. Loss of function mutants have reduced germination in the presence of osmotic stressors. protein_coding GLYCINE-RICH DOMAIN PROTEIN1 (ATGRDP1) GLYCINE-RICH DOMAIN PROTEIN1 (ATGRDP1)		0.655092	0.00308456		-0.16611	0.558168		0.463329	0.0689867		0.317437		UP	-	-	-		-	-	not reported	-
AT1G76190	SAUR-like auxin-responsive protein family;(source:Araport11) protein_coding SMALL AUXIN UPREGULATED RNA 56 (SAUR56) SMALL AUXIN UPREGULATED RNA 56 (SAUR56)		1	0.000111546		-0.00427033	0.998933		-0.0442321	0.999977		0.317166		UP	-	-	-		-	-	not reported	-
AT3G51400	hypothetical protein (DUF241);(source:Araport11) protein_coding		0.881388	0.0310177		0.0803992	0.987358		-0.0127522	0.999977		0.316345		UP	-	-	-		-	-	not reported	-
AT3G44350	NAC domain containing protein 61;(source:Araport11) protein_coding NAC DOMAIN CONTAINING PROTEIN 61 (NAC061) NAC DOMAIN CONTAINING PROTEIN 61 (NAC061);NAC DOMAIN CONTAINING PROTEIN 61 (anac061)		1	7.26e-05		-0.0407399	0.975275		-0.0119401	0.999977		0.315773		UP	-	-	-		-	-	not reported	-
AT4G38900	Basic-leucine zipper (bZIP) transcription factor family protein;(source:Araport11) protein_coding BASIC LEUCINE-ZIPPER 29 (BZIP29) DRINK ME-LIKE (DKML);BASIC LEUCINE-ZIPPER 29 (BZIP29)		0.728454	0.0159369		0.022817	0.998915		0.195278	0.999977		0.315516		UP	-	-	-		-	-	not reported	-
AT1G68340	hypothetical protein (DUF1639);(source:Araport11) protein_coding		0.690089	0.0118347		0.0642207	0.971322		0.189622	0.953876		0.314644		UP	-	-	-		-	YES	no	-
AT1G69430	Son of sevenless protein;(source:Araport11) protein_coding		1.13496	0.00220698		-0.129018	0.887694		-0.0639173	0.999977		0.314008		UP	-	-	-		-	YES	no	-
AT4G24690	Encodes NBR1, a selective autophagy substrate. The mRNA is cell-to-cell mobile. protein_coding NEXT TO BRCA1 GENE 1 (NBR1) ARABIDOPSIS THALIANA NEXT TO BRCA1 GENE 1 (AtNBR1);NEXT TO BRCA1 GENE 1 (NBR1)		0.697406	0.00339437		0.0111353	0.998915		0.230491	0.607081		0.313011		UP	-	-	-		YES	-	not reported	-
AT5G51080	RNase H family protein;(source:Araport11) protein_coding		0.883643	0.0142109		0.0188209	0.998915		0.036439	0.999977		0.312967		UP	-	-	-		-	-	not reported	-
AT3G28770	transmembrane protein, putative (DUF1216);(source:Araport11) protein_coding		0.694521	0.0352988		0.25868	0.604622		-0.0212172	0.999977		0.310661		UP	-	-	-		-	-	not reported	-
AT1G78480	Prenyltransferase family protein;(source:Araport11) protein_coding		0.806333	0.00160043		0.00332523	0.9993		0.118951	0.999977		0.309536		UP	-	-	-		-	YES	YES	-
AT5G03280	Involved in ethylene signal transduction. Acts downstream of CTR1. Positively regulates ORE1 and negatively regulates mir164A,B,C to regulate leaf senescence. A maternally expressed imprinted gene. Mutations in ein2 block ethylene stimulation of flavonol synthesis. The mRNA is cell-to-cell mobile. protein_coding ETHYLENE INSENSITIVE 2 (EIN2) ETHYLENE INSENSITIVE 2 (EIN2); (PIR2);CYTOKININ RESISTA…		0.577297	0.00688344		0.110656	0.785885		0.24042	0.513469		0.309458		UP	-	-	-		YES	YES	YES	Signaling
AT5G45630	senescence regulator (Protein of unknown function, DUF584);(source:Araport11) protein_coding		0.989621	0.0041597		-0.031225	0.998915		-0.030394	0.999977		0.309334		UP	-	-	-		-	-	not reported	-
AT4G38840	SAUR-like auxin-responsive protein family;(source:Araport11) protein_coding SMALL AUXIN UPREGULATED RNA 14 (SAUR14) SMALL AUXIN UPREGULATED RNA 14 (SAUR14)		0.742713	0.0136496		0.214242	0.637965		-0.029293	0.999977		0.309221		UP	-	-	-		-	-	not reported	-
AT1G61610	S-locus lectin protein kinase family protein;(source:Araport11) protein_coding		1	4.56e-05		-0.055287	0.925055		-0.0174958	0.999977		0.309072		UP	-	-	-		-	-	not reported	-
AT1G77730	Pleckstrin homology (PH) domain superfamily protein;(source:Araport11) protein_coding		0.827676	0.00218699		0.111713	0.841812		-0.0129084	0.999977		0.308827		UP	-	-	-		-	-	not reported	-
AT5G61310	Cytochrome c oxidase subunit Vc family protein;(source:Araport11) protein_coding		0.701482	0.0109525		0.186849	0.659101		0.0365633	0.999977		0.308298		UP	-	-	-		-	-	not reported	-
AT1G73066	Leucine-rich repeat family protein;(source:Araport11) protein_coding		1.01874	0.00664493		-0.0837663	0.974059		-0.0103422	0.999977		0.30821		UP	-	-	-		-	-	not reported	-
AT1G77480	Eukaryotic aspartyl protease family protein;(source:Araport11) protein_coding		0.579542	0.0388223		0.312048	0.35995		0.0329354	0.999977		0.308175		UP	-	-	-		-	-	not reported	-
AT3G25280	Major facilitator superfamily protein;(source:Araport11) protein_coding NRT1/ PTR FAMILY 4.2 (NPF4.2) (ATNPF4.2);NRT1/ PTR FAMILY 4.2 (NPF4.2)		1	0.000169586		-0.0676997	0.920422		-0.0079777	0.999977		0.308108		UP	-	-	-		-	-	not reported	-
AT5G65100	Ethylene insensitive 3 family protein;(source:Araport11) protein_coding		1	0.000387226		-0.0208044	0.998915		-0.0553765	0.999977		0.30794		UP	-	-	-		-	-	not reported	TF
AT5G45350	proline-rich family protein;(source:Araport11) protein_coding		0.728254	0.0214375		0.151916	0.830654		0.0396453	0.999977		0.306605		UP	-	-	-		-	-	not reported	-
AT1G52510	alpha/beta-Hydrolases superfamily protein;(source:Araport11) protein_coding		0.866963	0.0103978		0.0682546	0.984592		-0.0156818	0.999977		0.306512		UP	-	-	-		-	-	not reported	-
AT3G21780	Encodes a protein with UDP-glucosyl transferase activity that was shown to preferentially glucosylates abscisic acid (ABA), and not its catabolites. Moreover, UGT71B6 was shown to have a strict preference for the naturally-occurring ABA enantiomer, (+)-ABA, and not its 'unnatural' relative, (-)-ABA. This is in contrast to the other identified UGT genes catalyzing the glucosylation of ABA which we…		1.24901	0.00727396		-0.505968	0.324378		0.174117	0.999977		0.305721		UP	-	-	-		-	YES	not detected	-
AT5G41730	Protein kinase family protein;(source:Araport11) protein_coding		0.980544	0.00357799		-0.0560467	0.989832		-0.00826922	0.999977		0.305409		UP	-	-	-		-	-	not reported	-
AT2G43760	molybdopterin biosynthesis MoaE family protein;(source:Araport11) protein_coding COFACTOR OF NITRATE REDUCTASE AND XANTHINE DEHYDROGENASE 6 (CNX6) COFACTOR OF NITRATE REDUCTASE AND XANTHINE DEHYDROGENASE 6 (CNX6)		0.543611	0.0102256		0.350298	0.0955934		0.0210361	0.999977		0.304982		UP	-	-	-		-	-	not reported	-
AT3G04000	ChlADR is an aldehyde reductase that catalyzes the reduction of the aldehyde carbonyl groups on saturated and alpha,beta-unsaturated aldehydes with more than 5 carbons in vitro. The N-terminal region of this protein directs GFP to the chloroplast where where ChlADR likely helps to maintain the photosynthetic process by detoxifying reactive carbonyls formed during lipid peroxidation. In addition, …		0.639952	0.00879998		0.136063	0.757664		0.137355	0.999977		0.304457		UP	-	-	-		-	-	not reported	-
AT1G61065	1,3-beta-glucan synthase component (DUF1218);(source:Araport11) protein_coding		0.883702	0.00744841		-0.210292	0.679594		0.239586	0.89838		0.304332		UP	-	-	-		-	-	not reported	-
AT5G56160	Sec14p-like phosphatidylinositol transfer family protein;(source:Araport11) protein_coding		0.59985	0.0303851		0.0983	0.91722		0.214824	0.893639		0.304325		UP	-	-	-		-	-	not reported	-
AT5G16640	Pentatricopeptide repeat (PPR) superfamily protein;(source:Araport11) protein_coding		0.755398	0.0136541		0.0933965	0.934979		0.0627308	0.999977		0.303842		UP	-	-	-		-	YES	no	-
AT5G43980	Encodes a plasmodesmal protein that affects the intercellular movement of molecules through the plasmodesmata. The cytoplasmic C-terminal portion of the protein is connected to the apoplastic N-terminal portion of the protein by a single transmembrane domain (TMD). It is transported to the plasmodesmata through the secretory pathway. PDLP1 has two DUF26 domains and a signal peptide, but the prope…		0.921336	0.0318036		0.0414589	0.998915		-0.0520561	0.999977		0.303579		UP	-	-	-		-	-	not reported	-
AT2G14420	transposable_element_gene;(source:Araport11);Mutator-like transposase family, has a 8.4e-10 P-value blast match to GB:AAA21566 mudrA of transposon=MuDR (MuDr-element) (Zea mays);(source:TAIR10) transposable_element_gene		1	7.21e-05		-0.0596933	0.922255		-0.0309372	0.999977		0.303123		UP	-	-	-		-	-	not reported	-
AT2G34860	DnaJ/Hsp40 cysteine-rich domain superfamily protein;(source:Araport11) protein_coding EMBRYO SAC DEVELOPMENT ARREST 3 (EDA3) (PSA2);EMBRYO SAC DEVELOPMENT ARREST 3 (EDA3)		0.629474	0.0107845		0.129973	0.787656		0.147499	0.999977		0.302316		UP	-	-	-		-	-	not reported	-
AT5G28650	member of WRKY Transcription Factor; Group II-d protein_coding WRKY DNA-BINDING PROTEIN 74 (WRKY74) ARABIDOPSIS THALIANA WRKY DNA-BINDING PROTEIN 74 (ATWRKY74);WRKY DNA-BINDING PROTEIN 74 (WRKY74)		1.10751	0.00728075		0.233421	0.745849		-0.434567	0.572976		0.30212		UP	-	-	-		-	-	not reported	-
AT3G04550	Encodes an ancillary chaperone protein that functions in Rubisco biogenesis. RAF1 dimers function in the assembly of the large subunit of Rubisco. Co-expression of RAF1 and rbcL in tobacco cells results in increased photosynthesis and plant growth. The mRNA is cell-to-cell mobile. protein_coding RUBISCO ACCUMULATION FACTOR 1 (RAF1) RUBISCO ACCUMULATION FACTOR 1 (RAF1)		0.729444	0.0260538		0.100313	0.938		0.0759833	0.999977		0.301914		UP	-	-	-		-	-	not reported	-
AT2G43750	Arabidopsis thaliana O-acetylserine (thiol) lyase (OAS-TL) isoform oasB, the key enzyme for fixation of inorganic sulfide. It catalyzes the formation of cysteine from O-acetylserine and inorganic sulfide. Required for pollen tube growth and/or fertilization. protein_coding O-ACETYLSERINE (THIOL) LYASE B (OASB) O-ACETYLSERINE (THIOL) LYASE B (OASB);ARABIDOPSIS THALIANA CYSTEIN SYNTHASE-B (ATCS-B);…		0.513364	0.0419432		0.0285763	0.998915		0.362657	0.363509		0.301533		UP	-	-	-		-	-	not reported	-
AT4G29080	phytochrome-associated protein 2 (PAP2) protein_coding PHYTOCHROME-ASSOCIATED PROTEIN 2 (PAP2) INDOLE-3-ACETIC ACID INDUCIBLE 27 (IAA27);PHYTOCHROME-ASSOCIATED PROTEIN 2 (PAP2)		0.573911	0.0196024		0.476227	0.0570495		-0.145573	0.999977		0.301521		UP	-	-	-		-	-	not reported	-
AT1G23520	hypothetical protein (DUF220);(source:Araport11) protein_coding		0.973936	0.00133405		-0.0633882	0.969504		-0.00688363	0.999977		0.301221		UP	-	-	-		-	-	not reported	-
AT4G25380	stress-associated protein 10;(source:Araport11) protein_coding STRESS-ASSOCIATED PROTEIN 10 (SAP10) ARABIDOPSIS THALIANA STRESS-ASSOCIATED PROTEIN 10 (AtSAP10);STRESS-ASSOCIATED PROTEIN 10 (SAP10)		0.696159	0.0309741		0.252074	0.604474		-0.0449769	0.999977		0.301085		UP	-	-	-		-	-	not reported	-
AT2G02100	Predicted to encode a PR (pathogenesis-related) protein. Belongs to the plant defensin (PDF) family with the following members: At1g75830/PDF1.1, At5g44420/PDF1.2a, At2g26020/PDF1.2b, At5g44430/PDF1.2c, At2g26010/PDF1.3, At1g19610/PDF1.4, At1g55010/PDF1.5, At2g02120/PDF2.1, At2g02100/PDF2.2, At2g02130/PDF2.3, At1g61070/PDF2.4, At5g63660/PDF2.5, At2g02140/PDF2.6, At5g38330/PDF3.1 and At4g30070/PDF…		0.634715	0.0323692		0.180682	0.739283		0.0871167	0.999977		0.300838		UP	-	-	-		-	YES	no	-
AT1G69440	Encodes ARGONAUTE7, a member of the ARGONAUTE family, characterised by the presence of PAZ and PIWI domains. Involved in the regulation of developmental timing. Required for the accumulation of TAS3 ta-siRNAs but not for accumulation of miR171, miR173, miR390 or mi391. Localized in mature rosette leaves and floral buds. protein_coding ARGONAUTE7 (AGO7) ARGONAUTE7 (AGO7);ZIPPY (ZIP)		0.765756	0.00216113		0.107756	0.82715		0.0277442	0.999977		0.300419		UP	-	-	-		-	-	not reported	-
AT4G00490	Encodes a chloroplast beta-amylase. The enzyme activity is very weak compared to BAM1 and BAM3. It forms a tetramer whose activity requires K+ and exhibits sigmoidal kinetics Mutants of BAM2 have no visible phenotype. protein_coding BETA-AMYLASE 2 (BAM2) BETA-AMYLASE 9 (BMY9);BETA-AMYLASE 2 (BAM2)		0.674401	0.0131963		-0.338191	0.248334		0.562063	0.102175		0.299424		UP	-	-	-		-	-	not reported	-
AT4G39570	Galactose oxidase/kelch repeat superfamily protein;(source:Araport11) protein_coding		0.67065	0.0126597		-0.0952273	0.909274		0.322684	0.483571		0.299369		UP	-	-	-		-	-	not reported	-
AT1G03905	P-loop containing nucleoside triphosphate hydrolases superfamily protein;(source:Araport11) protein_coding ATP-BINDING CASSETTE I19 (ABCI19) NON-INTRINSIC ABC PROTEIN 4 (ATNAP4);ATP-BINDING CASSETTE I19 (ABCI19)		0.638777	0.00910169		0.129827	0.780969		0.129436	0.999977		0.299347		UP	-	-	-		-	-	not reported	-
AT5G19440	similar to Eucalyptus gunnii alcohol dehydrogenase of unknown physiological function (GI:1143445), apple tree, PIR:T16995; NOT a cinnamyl-alcohol dehydrogenase protein_coding		0.593711	0.0345458		0.0107057	0.998915		0.292416	0.641017		0.298944		UP	-	-	-		-	-	not reported	-
AT5G53740	hypothetical protein;(source:Araport11) protein_coding		1.06464	0.0239038		-0.124644	0.96032		-0.0435294	0.999977		0.298823		UP	-	-	-		-	-	not reported	-
AT3G05860	MADS-box transcription factor family protein;(source:Araport11) protein_coding AGAMOUS-LIKE 45 (AGL45) AGAMOUS-LIKE 45 (AGL45)		0.852272	0.00557752		-0.225487	0.597653		0.264989	0.742517		0.297258		UP	-	-	-		-	-	not reported	-
AT4G28320	Encodes a endo-beta-mannanase involved in seed germination. protein_coding ENDO-BETA-MANNASE 5 (MAN5) (AtMAN5);ENDO-BETA-MANNASE 5 (MAN5)		0.572833	0.0162609		0.308042	0.229063		0.00944804	0.999977		0.296774		UP	-	-	-		-	-	not reported	-
AT3G46150	hypothetical protein;(source:Araport11) protein_coding		0.807355	0.0235908		-0.0230175	0.998915		0.10579	0.999977		0.296709		UP	-	-	-		-	-	not reported	-
AT4G21730	pseudogene of N-ethylmaleimide sensitive factor (NSF) pseudogene		1.27634	0.00195236		-0.356161	0.440004		-0.0309875	0.999977		0.296398		UP	-	-	-		-	-	not reported	-
AT1G23540	Encodes a member of the PERK family of putative receptor kinases. Overexpression leads to morphological defects and reduced fertility and increased expression of MAX genes. protein_coding PROLINE-RICH EXTENSIN-LIKE RECEPTOR KINASE 12 (PERK12) INFLORESCENCE GROWTH INHIBITOR 1 (IGI1);PROLINE-RICH EXTENSIN-LIKE RECEPTOR KINASE 12 (PERK12);PROLINE-RICH EXTENSIN LIKE RECEPTOR KINASE (AtPERK12)		0.820479	0.00791886		0.0799754	0.955676		-0.0176399	0.999977		0.294272		UP	-	-	-		-	-	not reported	-
AT4G13670	plastid transcriptionally active 5;(source:Araport11) protein_coding PLASTID TRANSCRIPTIONALLY ACTIVE 5 (PTAC5) PLASTID TRANSCRIPTIONALLY ACTIVE 5 (PTAC5)		0.572475	0.0135894		-0.0104154	0.998915		0.319109	0.364735		0.293723		UP	-	-	-		-	-	not reported	-
AT3G53600	Nuclear C2H2 zinc finger protein.Expression is induced by cold, osmotic, salt, and drought stress. Over expression confers some drought tolerance whereas mutants display some drought sensitivity. protein_coding (ZAT18) (ZAT18)		0.768717	0.0451822		0.167575	0.865742		-0.0561027	0.999977		0.293397		UP	-	-	-		-	-	not reported	-
AT5G52500	transmembrane protein;(source:Araport11) protein_coding		1	5.52e-05		-0.107364	0.708552		-0.01542	0.999977		0.292405		UP	-	-	-		-	-	not reported	-
AT4G08740	hypothetical protein;(source:Araport11) protein_coding		1	0.00446614		-0.11988	0.906688		-0.00436269	0.999977		0.291919		UP	-	-	-		-	-	not reported	-
AT5G48100	Encodes a protein that is similar to laccase-like polyphenol oxidases. Involved in lignin and flavonoids biosynthesis. It has four conserved copper binding domains. Expressed in developing testa, where it colocalizes with the flavonoid end products proanthocyanidins and flavonols. Mutant plants exhibited a delay in developmentally determined browning of the testa, characterized by the pale brown …		0.931831	0.0374674		0.08985	0.987004		-0.146096	0.999977		0.291862		UP	-	-	-		-	YES	not detected	-
AT4G09970	transmembrane protein;(source:Araport11) protein_coding		0.77722	0.00286207		0.102033	0.860686		-0.00439582	0.999977		0.291619		UP	-	-	-		-	-	not reported	-
AT1G31290	ARGONAUTE 3;(source:Araport11) protein_coding ARGONAUTE 3 (AGO3) ARGONAUTE 3 (AGO3)		0.78352	0.0250305		0.104441	0.941921		-0.0132946	0.999977		0.291555		UP	-	-	-		-	YES	not detected	-
AT3G51570	Disease resistance protein (TIR-NBS-LRR class) family;(source:Araport11) protein_coding		0.640981	0.0187731		0.191348	0.653395		0.0418535	0.999977		0.291394		UP	-	-	-		-	-	not reported	-
AT5G42030	ABL interactor-like protein 4;(source:Araport11) protein_coding ABL INTERACTOR-LIKE PROTEIN 4 (ABIL4) ABL INTERACTOR-LIKE PROTEIN 4 (ABIL4)		0.761503	0.0184567		-0.0115743	0.998915		0.123663	0.999977		0.291197		UP	-	-	-		-	-	not reported	-
AT5G64990	RAB GTPase homolog H1A;(source:Araport11) protein_coding RAB GTPASE HOMOLOG H1A (RABH1a) RAB GTPASE HOMOLOG H1A (RABH1a)		0.923998	0.0192672		0.001681	0.999445		-0.0524403	0.999977		0.29108		UP	-	-	-		-	-	not reported	-
AT5G03690	Aldolase superfamily protein;(source:Araport11) protein_coding FRUCTOSE-BISPHOSPHATE ALDOLASE 4 (FBA4) (ATFBA4);FRUCTOSE-BISPHOSPHATE ALDOLASE 4 (FBA4)		0.695248	0.00764306		-0.131825	0.796948		0.309706	0.471595		0.291043		UP	-	-	-		-	-	not reported	-
AT4G00390	DNA-binding storekeeper protein-related transcriptional regulator;(source:Araport11) protein_coding		0.570887	0.0340047		0.29564	0.366096		0.00588104	0.999977		0.290803		UP	-	-	-		-	-	not reported	-
AT1G78930	Mitochondrial transcription termination factor family protein;(source:Araport11) protein_coding		0.944382	0.00283055		-0.0694223	0.969259		-0.00286852	0.999977		0.290697		UP	-	-	-		-	-	not reported	-
AT1G20690	SWI-SNF-related chromatin binding protein;(source:Araport11) protein_coding		0.769026	0.0197275		0.11242	0.921707		-0.010943	0.999977		0.290167		UP	-	-	-		-	-	not reported	-
AT5G13880	cotton fiber protein;(source:Araport11) protein_coding		0.900862	0.0374215		-0.0313844	0.998915		-0.000123047	0.999977		0.289785		UP	-	-	-		-	-	not reported	-
AT4G38540	FAD/NAD(P)-binding oxidoreductase family protein;(source:Araport11) protein_coding		0.710858	0.00405773		0.0679103	0.940797		0.0888989	0.999977		0.289222		UP	-	-	-		-	-	not reported	-
AT5G48800	Phototropic-responsive NPH3 family protein;(source:Araport11) protein_coding		0.638881	0.0471862		-0.18466	0.773631		0.413251	0.464851		0.289157		UP	-	-	-		-	YES	YES	-
AT1G72680	cinnamyl-alcohol dehydrogenase;(source:Araport11) protein_coding CINNAMYL-ALCOHOL DEHYDROGENASE (CAD1) CINNAMYL-ALCOHOL DEHYDROGENASE (CAD1);CINNAMYL ALCOHOL DEHYDROGENASE 1 (ATCAD1)		0.52776	0.0321225		-0.0257543	0.998915		0.364716	0.337285		0.288907		UP	-	-	-		-	-	not reported	-
AT1G59750	Encodes a member of the auxin response factor family. ARFs bind to the cis element 5'-TGTCTC-3' ARFs mediate changes in gene expression in response to auxin. ARF's form heterodimers with IAA/AUX genes. ARF1 enhances mutant phenotypes of ARF2 and may act with ARF2 to control aspects of maturation and senescence.ARF1:LUC and 3xHA:ARF1 proteins have a half-life of ~3-4 hours and their degradation is…		0.614885	0.00303774		-0.0449001	0.971741		0.293586	0.282822		0.287857		UP	-	-	-		YES	-	not reported	-
AT5G08535	D111/G-patch domain-containing protein;(source:Araport11) protein_coding		0.815975	0.00272184		0.0636483	0.960895		-0.0177003	0.999977		0.287308		UP	-	-	-		-	-	not reported	-
AT2G39560	Putative membrane lipoprotein;(source:Araport11) protein_coding		0.639944	0.0376119		0.12009	0.896434		0.10049	0.999977		0.286841		UP	-	-	-		-	-	not reported	-
AT5G47440	FORKED-LIKE family member, part of Group 3 (Group 1 consists of FKD1, FL1-FL3; Group 2 consists of FL4 and FL8 and Group 3 consists of FL5- FL7). May coordinate leaf size with vein density, where Group 1 members and Group 3 members have opposing functions. protein_coding FORKED-LIKE6 (FL6) FORKED-LIKE6 (FL6)		0.940582	0.00895003		-0.0770742	0.98086		-0.00340248	0.999977		0.286702		UP	-	-	-		-	-	not reported	-
AT1G67460	Minichromosome maintenance (MCM2/3/5) family protein;(source:Araport11) protein_coding		0.891451	0.010747		0.0157307	0.998915		-0.0471109	0.999977		0.28669		UP	-	-	-		-	-	not reported	-
AT5G05550	Encodes trihelix-domain transcription factor VFP5. Interacts with agrobacterium virulence protein VirF. protein_coding VFP5 (VFP5) (At5g05550);EIN2 NUCLEAR ASSOCIATED PROTEIN 2 (ENAP2);VFP5 (VFP5)		0.567982	0.0278985		0.0546913	0.984174		0.236117	0.751725		0.286263		UP	-	-	-		-	-	not reported	-
AT5G64450	NYN domain protein;(source:Araport11) protein_coding		1.01976	0.0191988		0.0872183	0.985975		-0.251018	0.999977		0.285322		UP	-	-	-		-	-	not reported	-
AT1G07010	Calcineurin-like metallo-phosphoesterase superfamily protein;(source:Araport11) protein_coding SHEWENELLA-LIKE PROTEIN PHOSPHATASE 1 (SLP1) (ATSLP1);SHEWENELLA-LIKE PROTEIN PHOSPHATASE 1 (SLP1)		0.796762	0.00184722		0.0708278	0.931322		-0.0116601	0.999977		0.28531		UP	-	-	-		-	-	not reported	-
AT3G59400	GUN, genomes uncoupled, is necessary for coupling the expression of some nuclear genes to the functional state of the chloroplast. Binds to the magnesium chelatase complex and promotes formation of the substrate,a tetrapyrrole signaling molecule. Porphyrin-binding protein that enhances the activity of Mg-chelatase. Although required for chlorophyll accumulation under normal growth conditions, GUN…		0.873595	0.0488723		-0.000330133	0.999817		-0.0201644	0.999977		0.284367		UP	-	-	-		-	-	not reported	-
AT5G56370	F-box/RNI-like/FBD-like domains-containing protein;(source:Araport11) protein_coding		0.683601	0.023586		0.160994	0.795128		0.00527861	0.999977		0.283291		UP	-	-	-		-	-	not reported	-
AT2G23470	root UVB sensitive protein (Protein of unknown function, DUF647);(source:Araport11) protein_coding ROOT UV-B SENSITIVE 4 (RUS4) ROOT UV-B SENSITIVE 4 (RUS4)		0.85817	0.000506385		-0.0417047	0.984051		0.0329635	0.999977		0.283143		UP	-	-	-		-	-	not reported	-
AT4G22830	YCF49-like protein;(source:Araport11) protein_coding		0.923524	0.0221092		-0.064972	0.995953		-0.00998139	0.999977		0.282857		UP	-	-	-		-	-	not reported	-
AT3G44840	S-adenosyl-L-methionine-dependent methyltransferases superfamily protein;(source:Araport11) protein_coding		1	3.34e-05		-0.132939	0.550543		-0.018764	0.999977		0.282766		UP	-	-	-		-	-	not reported	-
AT2G03870	Small nuclear ribonucleoprotein family protein;(source:Araport11) protein_coding EMBRYO DEFECTIVE 2816 (EMB2816) SM-LIKE 7 (LSM7);EMBRYO DEFECTIVE 2816 (EMB2816)		0.733305	0.00434408		-0.00418067	0.9993		0.119027	0.999977		0.282717		UP	-	-	-		-	-	not reported	-
AT5G52900	Encodes a member of the MAKR (MEMBRANE-ASSOCIATED KINASE REGULATOR) gene family. MAKRs have putative kinase interacting motifs and membrane localization signals. Known members include: AT5G26230 (MAKR1), AT1G64080 (MAKR2), AT2G37380 (MAKR3), AT2G39370 (MAKR4), AT5G52870 (MAKR5) and AT5G52900 (MAKR6). protein_coding MEMBRANE-ASSOCIATED KINASE REGULATOR 6 (MAKR6) MEMBRANE-ASSOCIATED KINASE REGULATO…		1.20667	0.000733228		-0.13335	0.849537		-0.226193	0.892412		0.282376		UP	-	-	-		YES	-	not reported	-
AT5G19170	NEP-interacting protein, putative (DUF239);(source:Araport11) protein_coding		1.11852	0.00164136		-0.260403	0.55003		-0.0117622	0.999977		0.282118		UP	-	-	-		-	-	not reported	-
AT5G48410	member of Putative ligand-gated ion channel subunit family protein_coding GLUTAMATE RECEPTOR 1.3 (GLR1.3) ARABIDOPSIS THALIANA GLUTAMATE RECEPTOR 1.3 (ATGLR1.3);GLUTAMATE RECEPTOR 1.3 (GLR1.3)		1.01806	0.0131493		-0.346595	0.533284		0.168616	0.999977		0.280027		UP	-	-	-		-	-	not reported	-
AT3G57030	Calcium-dependent phosphotriesterase superfamily protein;(source:Araport11) protein_coding		0.560113	0.0347526		0.0911655	0.924182		0.187767	0.964137		0.279682		UP	-	-	-		YES	YES	no	-
AT4G00690	UB-like protease 1B;(source:Araport11) protein_coding UB-LIKE PROTEASE 1B (ULP1B) UB-LIKE PROTEASE 1B (ULP1B)		0.698673	0.0235437		0.0912218	0.942862		0.048777	0.999977		0.279557		UP	-	-	-		-	-	not reported	-
AT3G21420	LATERAL BRANCHING OXIDOREDUCTASE (LBO), encodes an oxidoreductase-like enzyme of the 2-oxoglutarate and Fe(II)-dependent dioxygenase superfamily. It is involved in the biosynthesis of strigolactones. protein_coding LATERAL BRANCHING OXIDOREDUCTASE 1 (LBO1) LATERAL BRANCHING OXIDOREDUCTASE 1 (LBO1)		0.763757	0.00594393		0.227097	0.528413		-0.158154	0.999977		0.277567		UP	-	-	-		-	-	not reported	-
AT1G62090	pseudogene of Leucine-rich repeat protein kinase family protein;(source:Araport11) pseudogene		0.772581	0.00124919		0.0718763	0.916613		-0.0125784	0.999977		0.277293		UP	-	-	-		-	-	not reported	-
AT2G33735	Chaperone DnaJ-domain superfamily protein;(source:Araport11) protein_coding		0.682295	0.0168712		0.19068	0.675028		-0.0423246	0.999977		0.276883		UP	-	-	-		-	-	not reported	-
AT1G28360	encodes a member of the ERF (ethylene response factor) subfamily B-1 of ERF/AP2 transcription factor family (ERF12). The protein contains one AP2 domain. There are 15 members in this subfamily including ATERF-3, ATERF-4, ATERF-7, and leafy petiole. protein_coding ERF DOMAIN PROTEIN 12 (ERF12) ERF DOMAIN PROTEIN 12 (ATERF12);ERF DOMAIN PROTEIN 12 (ERF12)		0.612789	0.00980833		0.217742	0.463282		-0.00173964	0.999977		0.276264		UP	-	-	-		-	-	not reported	TF
AT5G11670	The malic enzyme (EC 1.1.1.40) encoded by AtNADP-ME2 is presumably a cytosolic enzyme involved in malate metabolism and possibly assisting the oxidative pentose phosphate pathway. AtNADP-ME2 counts for the major part of NADP-ME activity in mature tissues of Arabidopsis. protein_coding NADP-MALIC ENZYME 2 (NADP-ME2) NADP-MALIC ENZYME 2 (NADP-ME2);ARABIDOPSIS THALIANA NADP-MALIC ENZYME 2 (ATNADP-ME…		0.767998	0.0206422		0.108706	0.927263		-0.0485662	0.999977		0.276046		UP	-	-	-		-	-	not reported	-
AT5G28500	rubisco accumulation factor-like protein;(source:Araport11) protein_coding		0.801496	0.0111328		0.0914668	0.941287		-0.0697909	0.999977		0.274391		UP	-	-	-		-	-	not reported	-
AT5G11060	A member of Class II KN1-like homeodomain transcription factors (together with KNAT3 and KNAT5), with greatest homology to the maize knox1 homeobox protein. Expression regulated by light. Detected in all tissues examined, but most prominent in leaves and young siliques. Transient expression of GFP translational fusion protein suggests bipartite localization in nucleus and cytoplasm. KNAT4 promote…		0.724622	0.0353951		0.0848266	0.970572		0.0135241	0.999977		0.274324		UP	-	-	-		-	-	not reported	-
AT4G21580	oxidoreductase, zinc-binding dehydrogenase family protein;(source:Araport11) protein_coding		0.667829	0.0237375		-0.0662343	0.980592		0.221254	0.913282		0.274283		UP	-	-	-		-	-	not reported	-
AT1G13200	F-box and associated interaction domains-containing protein;(source:Araport11) protein_coding		0.801442	0.00564045		0.0287129	0.998915		-0.00897834	0.999977		0.273726		UP	-	-	-		-	-	not reported	-
AT2G40180	Encodes PP2C5, a member of the PP2C family phosphatases. PP2C5 acts as a MAPK phosphatase that positively regulates seed germination, stomatal closure and ABA-inducible gene expression. protein_coding PHOSPHATASE 2C5 (PP2C5) PHOSPHATASE 2C5 (ATHPP2C5);PHOSPHATASE 2C5 (PP2C5)		0.92899	0.000342849		-0.0468694	0.976194		-0.0692822	0.999977		0.270946		UP	-	-	-		YES	-	not reported	-
AT3G63420	heterotrimeric G protein gamma-subunit (AGG1) mRNA, protein_coding GGAMMA-SUBUNIT 1 (GG1) GGAMMA-SUBUNIT 1 (GG1); (ATAGG1);GGAMMA-SUBUNIT 1 (AGG1)		0.666185	0.0114371		0.118463	0.843721		0.0271571	0.999977		0.270602		UP	-	-	-		-	-	not reported	-
AT1G64405	hypothetical protein;(source:Araport11) protein_coding		1.41863	0.00513694		0.0657859	0.998163		-0.673581	0.356106		0.270278		UP	-	-	-		-	-	not reported	-
AT2G30280	Encodes RDM4, a transcriptional regulator functioning in RNA-directed DNA methylation and plant development. protein_coding RNA-DIRECTED DNA METHYLATION 4 (RDM4) DEFECTIVE IN MERISTEM SILENCING 4 (DMS4);RNA-DIRECTED DNA METHYLATION 4 (RDM4)		0.684959	0.0407668		0.0875019	0.963976		0.0381349	0.999977		0.270199		UP	-	-	-		-	-	not reported	-
AT1G78970	Lupeol synthase. Converts oxidosqualene to multiple triterpene alcohols and a triterpene diols. This conversion proceeds through the formation of a 17&#946;-dammarenyl cation. protein_coding LUPEOL SYNTHASE 1 (LUP1) ARABIDOPSIS THALIANA LUPEOL SYNTHASE 1 (ATLUP1);LUPEOL SYNTHASE 1 (LUP1)		0.9708	0.00293806		-0.138758	0.837172		-0.0218966	0.999977		0.270048		UP	-	-	-		-	-	not reported	-
AT2G01810	RING/FYVE/PHD zinc finger superfamily protein;(source:Araport11) protein_coding		0.894248	0.000726422		-0.0504671	0.976439		-0.0342973	0.999977		0.269828		UP	-	-	-		-	-	not reported	-
AT1G22630	SSUH2-like protein;(source:Araport11) protein_coding		0.987112	0.000855804		-0.130282	0.797455		-0.0482114	0.999977		0.26954		UP	-	-	-		-	-	not reported	-
AT4G25420	Encodes gibberellin 20-oxidase that is involved in the later steps of the gibberellin biosynthetic pathway. Regulated by a circadian clock. Weak expression response to far red light. protein_coding GIBBERELLIN 20 OXIDASE 1 (GA20OX1) GA REQUIRING 5 (GA5);ARABIDOPSIS THALIANA GIBBERELLIN 20-OXIDASE 1 (ATGA20OX1); (AT2301);GIBBERELLIN 20 OXIDASE 1 (GA20OX1)		0.617183	0.00335661		0.195564	0.407805		-0.00447709	0.999977		0.269423		UP	-	-	-		-	-	not reported	-
AT5G09320	vacuolar protein sorting-associated 9A-like protein;(source:Araport11) protein_coding (VPS9B) (VPS9B)		0.810744	0.00166232		0.0407461	0.989832		-0.0467787	0.999977		0.268237		UP	-	-	-		-	-	not reported	-
AT5G51970	Encodes a putative sorbitol dehydrogenase that can be thiolated in vitro. protein_coding SORBITOL DEHYDROGENASE (ATSDH) SORBITOL DEHYDROGENASE (ATSDH)		0.732524	0.0116727		0.000578667	0.999445		0.0702182	0.999977		0.267773		UP	-	-	-		-	-	not reported	-
AT1G54200	DNA mismatch repair Msh6-like protein;(source:Araport11) protein_coding BIG GRAIN 3 (BG3) BIG GRAIN 3 (BG3)		0.807355	0.0117098		-0.0463339	0.997263		0.0398888	0.999977		0.26697		UP	-	-	-		YES	-	not reported	-
AT2G47050	Plant invertase/pectin methylesterase inhibitor superfamily protein;(source:Araport11) protein_coding		1	0.000169567		-0.1755	0.507915		-0.0251148	0.999977		0.266462		UP	-	-	-		-	-	not reported	-
AT5G13410	FKBP-like peptidyl-prolyl cis-trans isomerase family protein;(source:Araport11) protein_coding		0.686616	0.00398326		0.019553	0.998915		0.0908399	0.999977		0.26567		UP	-	-	-		-	-	not reported	-
AT3G18070	beta glucosidase 43;(source:Araport11) protein_coding BETA GLUCOSIDASE 43 (BGLU43) BETA GLUCOSIDASE 43 (BGLU43)		0.921229	0.000290644		-0.0987284	0.816356		-0.0255449	0.999977		0.265652		UP	-	-	-		YES	-	not reported	-
AT1G09220	Pentatricopeptide repeat (PPR) superfamily protein;(source:Araport11) protein_coding		0.690545	0.0175689		0.109306	0.898978		-0.00348578	0.999977		0.265455		UP	-	-	-		-	-	not reported	-
AT2G21180	transmembrane protein;(source:Araport11) protein_coding		0.59801	0.0287478		-0.0599422	0.981771		0.256128	0.734074		0.264732		UP	-	-	-		-	-	not reported	-
AT2G41460	Apurinic endonuclease-redox protein. It functions as an apurinic/apyrimidinic class II endonuclease, and is involved in DNA repair. protein_coding APURINIC ENDONUCLEASE-REDOX PROTEIN (ARP) APURINIC ENDONUCLEASE-REDOX PROTEIN (ARP)		0.617418	0.0336085		-0.0066782	0.998933		0.182659	0.999977		0.264466		UP	-	-	-		-	-	not reported	-
AT2G05270	hypothetical protein;(source:Araport11) protein_coding		1	0.000681153		-0.155125	0.702996		-0.0522677	0.999977		0.264203		UP	-	-	-		-	-	not reported	-
AT1G71770	Encodes a Class I polyA-binding protein. Expressed in floral organs. Binds polyA sepharose in vitro. protein_coding POLY(A)-BINDING PROTEIN 5 (PAB5) POLY(A)-BINDING PROTEIN 5 (PAB5)		0.964805	0.0393918		-0.163828	0.921479		-0.00872087	0.999977		0.264086		UP	-	-	-		-	-	not reported	-
AT1G53090	Encodes a member of the SPA (suppressor of phyA-105) protein family (SPA1-SPA4). SPA proteins contain an N-terminal serine/threonine kinase-like motif followed by a coiled-coil structure and a C-terminal WD-repeat domain. SPA proteins function redundantly in suppressing photomorphogenesis in dark- and light-grown seedlings. SPA4 (and SPA3) predominantly regulates elongation growth in adult plants…		0.76937	0.000877983		0.0308033	0.996218		-0.0082655	0.999977		0.263969		UP	-	-	-		-	-	not reported	-
AT2G42560	late embryogenesis abundant domain-containing protein / LEA domain-containing protein;(source:Araport11) protein_coding LATE EMBRYOGENESIS ABUNDANT 25 (LEA25) LATE EMBRYOGENESIS ABUNDANT 25 (LEA25)		1	0.00136612		-0.1842	0.668251		-0.0251089	0.999977		0.263564		UP	-	-	-		-	-	not reported	-
AT5G03720	Member of Heat Stress Transcription Factor (Hsf) family. Expression is regulated by DREB2A and in turn HSFA3 regulates the expression of hsps Hsp18.1-CI and Hsp26.5-MII35S. Involved in establishing thermotolerence. protein_coding HEAT SHOCK TRANSCRIPTION FACTOR A3 (HSFA3) HEAT SHOCK TRANSCRIPTION FACTOR A3 (HSFA3);ARABIDOPSIS THALIANA HEAT SHOCK TRANSCRIPTION FACTOR A3 (AT-HSFA3)		0.757287	0.0352618		0.106172	0.946652		-0.0728087	0.999977		0.26355		UP	-	-	-		-	YES	no	-
AT5G66350	A member of SHI gene family. Arabidopsis thaliana has ten members that encode proteins with a RING finger-like zinc finger motif. Despite being highly divergent in sequence, many of the SHI-related genes are partially redundant in function and synergistically promote gynoecium, stamen and leaf development in Arabidopsis. Shi mutant is dominant, has dwarf phenotype. Loss of function mutations have…		0.78195	0.00614928		0.0194226	0.998915		-0.0109933	0.999977		0.26346		UP	-	-	-		-	-	not reported	-
AT5G23260	Encodes a MADS box protein. Regulates proanthocyanidin biosynthesis in the inner-most cell layer of the seed coat. Also controls cell shape of the inner-most cell layer of the seed coat. Also shown to be necessary for determining the identity of the endothelial layer within the ovule. Paralogous to GOA. Plays a maternal role in fertilization and seed development. protein_coding TRANSPARENT TESTA1…		1	0.000102901		-0.201943	0.353205		-0.008026	0.999977		0.263344		UP	-	-	-		-	-	not reported	-
AT5G05740	S2P-like putative metalloprotease, also contain transmembrane helices near their C-termini and many of them, five of seven, contain a conserved zinc-binding motif HEXXH. Homolog of EGY1. Each of the EGY1 and EGY-like proteins share two additional highly conserved motifs, the previously reported NPDG motif (aa 442?454 in EGY1, Rudner et al., 1999) and a newly defined GNLR motif (aa 171?179 in EGY1…		0.758529	0.00742051		0.0367085	0.998195		-0.00697117	0.999977		0.262756		UP	-	-	-		YES	-	not reported	Other
AT5G63100	S-adenosyl-L-methionine-dependent methyltransferases superfamily protein;(source:Araport11) protein_coding		0.637893	0.0206812		0.137504	0.818333		0.0103696	0.999977		0.261922		UP	-	-	-		-	-	not reported	-
AT2G27720	60S acidic ribosomal protein family;(source:Araport11) protein_coding		0.691418	0.0236283		0.158658	0.806285		-0.0645879	0.999977		0.261829		UP	-	-	-		-	-	not reported	-
AT1G67350	NADH-ubiquinone oxidoreductase;(source:Araport11) protein_coding		0.672081	0.0107429		0.0250933	0.998915		0.0871442	0.999977		0.26144		UP	-	-	-		-	-	not reported	-
AT4G36700	RmlC-like cupins superfamily protein;(source:Araport11) protein_coding		1	5.8e-05		-0.205264	0.282219		-0.0111566	0.999977		0.261193		UP	-	-	-		-	-	not reported	-
AT1G66780	MATE efflux family protein;(source:Araport11) protein_coding		0.89068	0.0104328		-0.0861597	0.963976		-0.0220131	0.999977		0.260836		UP	-	-	-		-	-	not reported	-
AT2G27680	NAD(P)-linked oxidoreductase superfamily protein;(source:Araport11) protein_coding		0.576906	0.00591834		0.0600487	0.938		0.143758	0.933938		0.260238		UP	-	-	-		-	-	not reported	-
AT1G69935	Encodes a nuclear localized serine-arginine-aspartate-rich protein that acts as a negative regulator of photomorphogenesis. protein_coding SHORT HYPOCOTYL IN WHITE LIGHT1 (SHW1) SHORT HYPOCOTYL IN WHITE LIGHT1 (SHW1)		0.916028	0.0106557		-0.0691015	0.986957		-0.0670701	0.999977		0.259952		UP	-	-	-		-	-	not reported	-
AT4G26830	O-Glycosyl hydrolases family 17 protein;(source:Araport11) protein_coding		0.660223	0.00716755		0.11986	0.810002		-0.00128684	0.999977		0.259599		UP	-	-	-		-	-	not reported	-
AT4G22280	F-box/RNI-like superfamily protein;(source:Araport11) protein_coding		0.792481	0.0341808		-0.0342253	0.998915		0.0180625	0.999977		0.258773		UP	-	-	-		-	-	not reported	-
AT4G28660	Similar to PsbW subunit of photosystem II. protein_coding PHOTOSYSTEM II REACTION CENTER PSB28 PROTEIN (PSB28) PHOTOSYSTEM II REACTION CENTER PSB28 PROTEIN (PSB28)		0.658547	0.0175873		0.130689	0.834814		-0.0132688	0.999977		0.258656		UP	-	-	-		-	-	not reported	-
AT1G32220	NAD(P)-binding Rossmann-fold superfamily protein;(source:Araport11) protein_coding		0.535744	0.0359685		0.197681	0.613323		0.0424417	0.999977		0.258622		UP	-	-	-		-	-	not reported	-
AT4G07530	transposable_element_gene;(source:Araport11);similar to unknown protein [Arabidopsis thaliana] (TAIR:AT3G30810.1);(source:TAIR10) transposable_element_gene		0.915037	0.0392338		-0.034137	0.998915		-0.105239	0.999977		0.258554		UP	-	-	-		-	-	not reported	-
AT1G02740	MRG family protein;(source:Araport11) protein_coding MORF RELATED GENE 2 (MRG2) MORF RELATED GENE 2 (MRG2)		0.773461	0.00763857		-0.0366923	0.998429		0.034216	0.999977		0.256995		UP	-	-	-		-	-	not reported	-
AT4G04620	Autophagy protein. protein_coding AUTOPHAGY 8B (ATG8B) AUTOPHAGY 8B (ATG8B)		0.801739	0.0197345		-0.259899	0.614251		0.229134	0.988717		0.256991		UP	-	-	-		-	-	not reported	-
AT5G59270	Concanavalin A-like lectin protein kinase family protein;(source:Araport11) protein_coding L-TYPE LECTIN RECEPTOR KINASE II.2 (LECRK-II.2) L-TYPE LECTIN RECEPTOR KINASE II.2 (LECRK-II.2)		0.569099	0.0272244		0.120288	0.843487		0.081227	0.999977		0.256871		UP	-	-	-		-	-	not reported	-
AT4G18450	encodes a member of the ERF (ethylene response factor) subfamily B-3 of ERF/AP2 transcription factor family. The protein contains one AP2 domain. There are 18 members in this subfamily including ATERF-1, ATERF-2, AND ATERF-5. protein_coding		0.782452	0.00336256		0.0525916	0.981771		-0.0668695	0.999977		0.256058		UP	-	-	-		YES	YES	no	TF
AT1G63280	Serine protease inhibitor (SERPIN) family protein;(source:Araport11) protein_coding		0.821928	0.0140579		-0.0273641	0.998915		-0.0266079	0.999977		0.255985		UP	-	-	-		-	-	not reported	-
AT4G26700	Encodes a member of the fimbrin family. Different members of the fimbrin/plastin family have diverged biochemically during evolution to generate either tight actin bundles or loose networks with distinct biochemical and biophysical properties. FIM4 generates both actin bundles and branched actin filaments whereas FIM5 only generates actin bundles. protein_coding FIMBRIN 1 (FIM1) ARABIDOPSIS THALI…		0.581121	0.0381301		0.186481	0.691589		-0.00277795	0.999977		0.254941		UP	-	-	-		-	-	not reported	-
AT4G01010	member of Cyclic nucleotide gated channel family protein_coding CYCLIC NUCLEOTIDE-GATED CHANNEL 13 (CNGC13) CYCLIC NUCLEOTIDE-GATED CHANNEL 13 (CNGC13);CYCLIC NUCLEOTIDE-GATED CHANNEL 13 (ATCNGC13)		0.97909	0.0421347		0.286736	0.755407		-0.502492	0.643828		0.254444		UP	-	-	-		-	-	not reported	-
AT3G47740	member of ATH subfamily protein_coding ATP-BINDING CASSETTE A3 (ABCA3) A. THALIANA ABC2 HOMOLOG 2 (ATATH2);ATP-BINDING CASSETTE A3 (ABCA3);ABC2 HOMOLOG 2 (ATH2)		0.567132	0.0480254		0.236044	0.577394		-0.0400051	0.999977		0.25439		UP	-	-	-		-	-	not reported	-
AT4G25510	hypothetical protein;(source:Araport11) protein_coding		0.717507	0.0420335		0.151044	0.870806		-0.108398	0.999977		0.253384		UP	-	-	-		-	-	not reported	-
AT2G36670	Eukaryotic aspartyl protease family protein;(source:Araport11) protein_coding		0.575567	0.0183719		-0.0720599	0.941904		0.256582	0.610901		0.253363		UP	-	-	-		-	-	not reported	-
AT5G58980	Neutral/alkaline non-lysosomal ceramidase;(source:Araport11) protein_coding NEUTRAL CERAMIDASE3 (ATNCER3) NEUTRAL CERAMIDASE3 (ATNCER3)		0.706474	0.0394598		0.0963857	0.953732		-0.0427968	0.999977		0.253354		UP	-	-	-		-	-	not reported	-
AT3G14160	2-oxoglutarate-dependent dioxygenase family protein;(source:Araport11) protein_coding		0.600179	0.0412151		0.0279699	0.998915		0.129844	0.999977		0.252664		UP	-	-	-		-	-	not reported	-
AT3G49520	F-box and associated interaction domains-containing protein;(source:Araport11) protein_coding		1.06277	0.00501506		-0.23488	0.68147		-0.0706931	0.999977		0.252398		UP	-	-	-		-	-	not reported	-
AT4G01510	Arv1-like protein;(source:Araport11) protein_coding (ARV2) (ARV2)		0.701582	0.00796821		-0.117385	0.84301		0.171919	0.977851		0.252039		UP	-	-	-		-	-	not reported	-
AT2G01320	ABC-2 type transporter family protein;(source:Araport11) protein_coding ATP-BINDING CASSETTE G7 (ABCG7) ATP-BINDING CASSETTE G7 (ABCG7)		0.680514	0.0273232		0.084224	0.955676		-0.00895429	0.999977		0.251928		UP	-	-	-		-	-	not reported	-
AT5G44920	Encodes a KASH domain protein that localizes to the nuclear envelope and affects nuclear morphology. protein_coding TIR-KASH PROTEIN (TIK) TIR-KASH PROTEIN (TIK); (ATTIK)		0.722007	0.0242295		-0.21828	0.673539		0.251997	0.876202		0.251908		UP	-	-	-		-	-	not reported	-
AT2G02980	Encodes a chloroplast RNA editing factor. protein_coding ORGANELLE TRANSCRIPT PROCESSING 85 (OTP85) ORGANELLE TRANSCRIPT PROCESSING 85 (OTP85)		0.86396	0.00547074		-0.100128	0.92124		-0.0113656	0.999977		0.250822		UP	-	-	-		-	-	not reported	-
AT3G60370	Encodes an immunophilin, FKBP20-2, that belongs to the FK-506 binding protein (FKBP) subfamily functioning as peptidyl-prolyl isomerases (PPIases) in protein folding. FKBP20-2 has a unique pair of cysteines at the C terminus and was found to be reduced by thioredoxin (Trx) (itself reduced by NADPH by means of NADP-Trx reductase). The FKBP20-2 protein, which contains only two of the five amino aci…		0.702258	0.0180666		0.184659	0.713487		-0.135337	0.999977		0.250527		UP	-	-	-		-	-	not reported	-
AT5G03000	Galactose oxidase/kelch repeat superfamily protein;(source:Araport11) protein_coding		1	9.68e-05		-0.231578	0.248334		-0.0180146	0.999977		0.250136		UP	-	-	-		-	-	not reported	-
AT4G39235	hypothetical protein;(source:Araport11) protein_coding		1.07228	0.0359404		-0.382558	0.632057		0.0596588	0.999977		0.249793		UP	-	-	-		-	-	not reported	-
AT1G55440	Cysteine/Histidine-rich C1 domain family protein;(source:Araport11) protein_coding		0.574369	0.0167904		0.182469	0.605654		-0.00855059	0.999977		0.249429		UP	-	-	-		-	-	not reported	-
AT1G18680	HNH endonuclease domain-containing protein;(source:Araport11) protein_coding (M20) (M20)		0.586176	0.0442954		-0.0749315	0.965927		0.230864	0.887127		0.247369		UP	-	-	-		-	-	not reported	-
AT3G62880	Homologous to pea OEP16 and barley pPORA (OEP16), a member of Arabidopsis OEP16 family. protein_coding (ATOEP16-4) (ATOEP16-4)		0.536218	0.0480851		0.065416	0.974258		0.137443	0.999977		0.246359		UP	-	-	-		-	-	not reported	-
AT3G01990	Member of a small family of ACT domain containing proteins in Arabidopsis. ACT domains are involved in amino acid binding. protein_coding ACT DOMAIN REPEAT 6 (ACR6) ACT DOMAIN REPEAT 6 (ACR6)		0.747003	0.00209484		0.0067328	0.998933		-0.0156537	0.999977		0.246027		UP	-	-	-		-	-	not reported	-
AT3G46630	DCL protein (DUF3223);(source:Araport11) protein_coding		0.608733	0.0347526		0.110001	0.901898		0.0125543	0.999977		0.243763		UP	-	-	-		-	-	not reported	-
AT4G18975	Pentatricopeptide repeat (PPR) superfamily protein;(source:Araport11) protein_coding		0.854978	0.00186986		0.0476777	0.986957		-0.171628	0.951943		0.243676		UP	-	-	-		-	-	not reported	-
AT1G01560	Member of MAP Kinase family. Flg22-induced activation is blocked by AvrRpt2. protein_coding MAP KINASE 11 (MPK11) MAP KINASE 11 (MPK11);MAP KINASE 11 (ATMPK11)		1	0.0438115		0.32744	0.701041		-0.596679	0.52085		0.243587		UP	-	-	-		-	-	not reported	-
AT2G02720	Pectate lyase family protein;(source:Araport11) protein_coding		0.77216	0.0296994		-0.0235757	0.998915		-0.0194554	0.999977		0.243043		UP	-	-	-		-	-	not reported	-
AT4G20030	RNA-binding (RRM/RBD/RNP motifs) family protein;(source:Araport11) protein_coding		0.589301	0.0159452		-0.0215251	0.998915		0.159753	0.994325		0.242509		UP	-	-	-		-	-	not reported	-
AT1G11770	Encodes an oligogalacturonide oxidase that inactivates the elicitor-active oligogalacturonides (OGs). protein_coding (ATBBE2) OLIGOGALACTURONIDE OXIDASE 3 (OGOX3); (ATBBE2)		1	0.00376163		-0.252451	0.580339		-0.0250338	0.999977		0.240838		UP	-	-	-		-	-	not reported	-
AT2G01940	Encodes a transcription factor that, together with IDD14 and IDD16, regulates auxin biosynthesis and transport and thus aerial organ morphogenesis and gravitropic responses. May be involved in an early event in shoot gravitropism such as gravity perception and/or a signaling process subsequent to amyloplast sedimentation as a putative transcription factor in gravity-perceptive cells. protein_codi…		0.761426	0.00353085		-0.0526354	0.981503		0.0125023	0.999977		0.240431		UP	-	-	-		-	-	not reported	-
AT1G78010	tRNA modification GTPase;(source:Araport11) protein_coding (TRME) (TRME)		0.504539	0.00336952		0.0964149	0.723538		0.118662	0.900856		0.239872		UP	-	-	-		-	-	not reported	-
AT1G48100	Pectin lyase-like superfamily protein;(source:Araport11) protein_coding POLYGALACTURONASE INVOLVED IN EXPANSION3 (PGX3) POLYGALACTURONASE INVOLVED IN EXPANSION3 (PGX3)		0.886668	0.00260134		-0.163467	0.720732		-0.00422923	0.999977		0.239657		UP	-	-	-		-	-	not reported	-
AT5G46440	PPR containing-like protein;(source:Araport11) protein_coding		0.707519	0.00788847		0.069326	0.955148		-0.0592809	0.999977		0.239188		UP	-	-	-		-	-	not reported	-
AT3G10060	FKBP-like peptidyl-prolyl cis-trans isomerase family protein;(source:Araport11) protein_coding		0.559552	0.0101635		0.124264	0.749571		0.0332394	0.999977		0.239019		UP	-	-	-		-	-	not reported	-
AT5G64460	Phosphoglycerate mutase family protein;(source:Araport11) protein_coding		0.821466	0.0036077		-0.0199757	0.998915		-0.0880921	0.999977		0.2378		UP	-	-	-		YES	-	not reported	-
AT1G21810	Encodes a protein that localizes at motile vesicle-like small compartments in differentiating xylem cells that is associated with microtubule plus-ends. VETH-positive compartments are unlikely to be elements in conventional endomembrane trafficking pathways. It can associate with COG2, and together these two proteins co-localize with the EXO70A1 exocyst subunit, tethering EXO70A1 to compartments …		0.831483	0.0202322		-0.0489634	0.998163		-0.0691657	0.999977		0.237784		UP	-	-	-		-	-	not reported	-
AT2G25340	Member of Synaptobrevin-like AtVAMP7C, v-SNARE protein family. protein_coding VESICLE-ASSOCIATED MEMBRANE PROTEIN 712 (VAMP712) VESICLE-ASSOCIATED MEMBRANE PROTEIN 712 (ATVAMP712);VESICLE-ASSOCIATED MEMBRANE PROTEIN 712 (VAMP712); (VAMP712)		1	0.000979488		-0.272237	0.375178		-0.0161173	0.999977		0.237215		UP	-	-	-		-	-	not reported	-
AT5G10380	Encodes a RING finger domain protein with E3 ligase activity that is localized to the lipid rafts of the plasma membrane. Expression is increased in response to fungal pathogen. May be involved in regulation of programmed cell death by facilitating degredation of regulation of PDC activators. The mRNA is cell-to-cell mobile. protein_coding (RING1) (ATRING1); (RING1)		0.631517	0.019013		0.0897733	0.925055		-0.00989442	0.999977		0.237132		UP	-	-	-		-	-	not reported	-
AT1G79900	encodes a mitochondrial ornithine transporter that exports ornithine from the mitochondria to the cytosol protein_coding (BAC2) (BAC2);ARABIDOPSIS MITOCHONDRIAL BASIC AMINO ACID CARRIER 2 (ATMBAC2)		0.729053	0.0198234		-0.153792	0.823695		0.133887	0.999977		0.236383		UP	-	-	-		-	-	not reported	-
AT2G46530	auxin response factor 11;(source:Araport11) protein_coding AUXIN RESPONSE FACTOR 11 (ARF11) AUXIN RESPONSE FACTOR 11 (ARF11)		0.739584	0.0184578		-0.00814483	0.998933		-0.0223081	0.999977		0.236377		UP	-	-	-		YES	-	not reported	-
AT1G47610	Transducin/WD40 repeat-like superfamily protein;(source:Araport11) protein_coding		0.902951	0.00729003		-0.194453	0.73253		-0.00610854	0.999977		0.23413		UP	-	-	-		-	-	not reported	-
AT3G20810	JMJD5 encodes a protein which contains a jumonji-C (jmjC) domain. jmjd5 mutant plants have a short-period circadian phenotype. JMJD5 has histone demethylase activity and interacts with EFM to repress FT. protein_coding JUMONJI DOMAIN CONTAINING 5 (JMJD5) JUMONJI C DOMAIN-CONTAINING PROTEIN 30 (JMJ30);JUMONJI DOMAIN CONTAINING 5 (JMJD5)		0.867303	0.00383915		-0.171068	0.719027		0.00577334	0.999977		0.234003		UP	-	-	-		-	-	not reported	-
AT3G17090	Protein phosphatase 2C family protein;(source:Araport11) protein_coding		0.567125	0.00420578		-0.023844	0.998429		0.158432	0.792474		0.233904		UP	-	-	-		-	-	not reported	-
AT1G31240	Bromodomain transcription factor;(source:Araport11) protein_coding		0.631493	0.00749671		0.0683879	0.938188		0.000361676	0.999977		0.233414		UP	-	-	-		-	-	not reported	-
AT1G33400	Encodes one of the 36 carboxylate clamp (CC)-tetratricopeptide repeat (TPR) proteins (Prasad 2010, Pubmed ID: 20856808) with potential to interact with Hsp90/Hsp70 as co-chaperones. protein_coding TETRATRICOPEPTIDE REPEAT 9 (TPR9) TETRATRICOPEPTIDE REPEAT 9 (TPR9)		0.500157	0.0407496		0.0311228	0.998915		0.168893	0.980646		0.233391		UP	-	-	-		YES	-	not reported	-
AT5G19700	Encodes a MATE transporter involved in leaf senescence and iron homeostasis. protein_coding EARLY LEAF SENESCENCE 1 (ELS1) EARLY LEAF SENESCENCE 1 (ELS1)		0.549768	0.0117803		0.1573	0.630276		-0.00722689	0.999977		0.23328		UP	-	-	-		-	-	not reported	-
AT3G26710	cofactor assembly of complex C;(source:Araport11) protein_coding COFACTOR ASSEMBLY OF COMPLEX C (CCB1) COFACTOR ASSEMBLY OF COMPLEX C (CCB1)		0.739024	0.011323		0.185988	0.690207		-0.226637	0.860577		0.232792		UP	-	-	-		-	-	not reported	-
AT2G44800	2-oxoglutarate (2OG) and Fe(II)-dependent oxygenase superfamily protein;(source:Araport11) protein_coding		0.72784	0.0366094		-0.000324967	0.999783		-0.0294009	0.999977		0.232705		UP	-	-	-		-	YES	not detected	-
AT5G25210	hypothetical protein;(source:Araport11) protein_coding		0.523597	0.048713		0.342874	0.254357		-0.175392	0.999977		0.23036		UP	-	-	-		-	-	not reported	-
AT1G74370	RING/U-box superfamily protein;(source:Araport11) protein_coding		0.50128	0.00961815		0.206644	0.348099		-0.0169604	0.999977		0.230321		UP	-	-	-		-	-	not reported	-
AT4G21480	Putative sugar transporter. Expressed in nematode-induced root syncytia. protein_coding SUGAR TRANSPORTER PROTEIN 12 (STP12) SUGAR TRANSPORTER PROTEIN 12 (STP12)		0.710382	0.02547		-0.0801116	0.966557		0.0604311	0.999977		0.230234		UP	-	-	-		-	-	not reported	-
AT3G22210	transmembrane protein;(source:Araport11) protein_coding		0.784816	0.00203468		-0.0674347	0.940112		-0.028485	0.999977		0.229632		UP	-	-	-		-	-	not reported	-
AT3G28630	actin cross-linking protein, putative (DUF569);(source:Araport11) protein_coding CROLIN 1 (CROLIN1) CROLIN 1 (CROLIN1)		0.718532	0.00934526		-0.0048944	0.9993		-0.0256308	0.999977		0.229336		UP	-	-	-		-	-	not reported	-
AT4G16670	FORKED-LIKE family member, part of Group 3 (Group 1 consists of FKD1, FL1-FL3; Group 2 consists of FL4 and FL8 and Group 3 consists of FL5- FL7). May coordinate leaf size with vein density, where Group 1 members and Group 3 members have opposing functions. protein_coding		0.827475	0.0087968		-0.370608	0.274583		0.230371	0.900159		0.229079		UP	-	-	-		-	-	not reported	-
AT1G21000	PLATZ transcription factor family protein;(source:Araport11) protein_coding		0.618594	0.0402879		0.326596	0.379239		-0.259949	0.817124		0.228414		UP	-	-	-		-	YES	no	-
AT2G21510	DNAJ heat shock N-terminal domain-containing protein;(source:Araport11) protein_coding		0.628961	0.00477806		0.0664471	0.929814		-0.0199737	0.999977		0.225145		UP	-	-	-		-	-	not reported	-
AT4G37320	member of CYP81D protein_coding "CYTOCHROME P450, FAMILY 81, SUBFAMILY D, POLYPEPTIDE 5" (CYP81D5) "CYTOCHROME P450, FAMILY 81, SUBFAMILY D, POLYPEPTIDE 5" (CYP81D5)		0.571491	0.031803		-0.119597	0.855292		0.221816	0.836342		0.22457		UP	-	-	-		-	-	not reported	-
AT5G38520	CLD1 is involved in steady-state chlorophyll turnover; CLD1 dephytylates chlorophyll a, chlorophyll b, and pheophytin a in vitro; CLD1 and CHLG form a salvage cycle in recycling chlorophyll. Suppression of CLD1 expression results in reduced tolerance to moderately high temperature. protein_coding CHLOROPHYLL DEPHYTYLASE1 (CLD1) CHLOROPHYLL DEPHYTYLASE1 (CLD1)		0.655051	0.0225977		0.0272254	0.998915		-0.00867338	0.999977		0.224534		UP	-	-	-		-	-	not reported	-
AT1G01500	Erythronate-4-phosphate dehydrogenase family protein;(source:Araport11) protein_coding		0.646799	0.00632114		0.040355	0.990682		-0.0159821	0.999977		0.223724		UP	-	-	-		-	-	not reported	-
AT1G04250	Transcription regulator acting as repressor of auxin-inducible gene expression. Auxin-inducible AUX/IAA gene. Short-lived nuclear protein with four conserved domains. Domain III has homology to beta alpha alpha dimerization and DNA binding domains. Involved in auxin signaling and is a positive modulator of natural leaf senescence. Auxin induces the degradation of the protein in a dosage-dependent…		0.575438	0.0325147		-0.050983	0.988153		0.146121	0.999977		0.223526		UP	-	-	-		-	-	not reported	-
AT4G09300	LisH and RanBPM domains containing protein;(source:Araport11) protein_coding		0.61539	0.0373849		-0.175629	0.754857		0.230467	0.895007		0.223409		UP	-	-	-		-	-	not reported	-
AT1G48350	Ribosomal L18p/L5e family protein;(source:Araport11) protein_coding EMBRYO DEFECTIVE 3105 (EMB3105) EMBRYO DEFECTIVE 3105 (EMB3105)		0.507091	0.00419253		0.125318	0.606199		0.0367508	0.999977		0.223053		UP	-	-	-		-	-	not reported	-
AT3G22450	Ribosomal L18p/L5e family protein;(source:Araport11) protein_coding		0.819112	0.00883286		-0.157037	0.803619		0.00690781	0.999977		0.222994		UP	-	-	-		-	-	not reported	-
AT4G24970	MORC7 is a member of a family of GHKL ATPases. It is localized in the nuceloplasm and adjacent to chromocenters. Along with MORC4, it appears to repress the expression of genes involved in defense against pathogens. protein_coding (ATMORC7) (ATMORC7)		0.568847	0.0252181		0.0250543	0.998915		0.0739064	0.999977		0.222602		UP	-	-	-		-	-	not reported	-
AT5G65550	UDP-Glycosyltransferase superfamily protein;(source:Araport11) protein_coding		0.7683	0.00220813		-0.0895446	0.881004		-0.0130698	0.999977		0.221895		UP	-	-	-		-	-	not reported	-
AT1G44830	Encodes a nuclear-localized member of the DREB subfamily A-5 of ERF/AP2 transcription factor family. The protein contains one AP2 domain. There are 15 members in this subfamily including RAP2.1, RAP2.9 and RAP2.10. Overexpression in cultured cells results in an increase in pectin deposition.ERF014 differentially regulates responses to bacterial and fungal pathogens. protein_coding ERF TRANSCRIPTI…		0.690516	0.0017005		-0.0285637	0.99699		-0.000767906	0.999977		0.220395		UP	-	-	-		-	-	not reported	-
AT3G22650	F-box and associated interaction domains-containing protein;(source:Araport11) protein_coding CEGENDUO (CEG) S-LOCUS F-BOX 61 (ATSFL61);CEGENDUO (CEG);S-LOCUS F-BOX 61 (SFL61)		0.792481	0.0253612		-0.0995332	0.952826		-0.0323855	0.999977		0.220188		UP	-	-	-		-	-	not reported	-
AT1G52820	2-oxoglutarate (2OG) and Fe(II)-dependent oxygenase superfamily protein;(source:Araport11) protein_coding		0.721745	0.020507		-0.0466376	0.99656		-0.0147777	0.999977		0.22011		UP	-	-	-		-	-	not reported	-
AT1G23880	NHL domain-containing protein;(source:Araport11) protein_coding		0.549094	0.021111		0.225077	0.464512		-0.119864	0.999977		0.218102		UP	-	-	-		YES	-	not reported	-
AT5G48250	B-box type zinc finger protein with CCT domain-containing protein;(source:Araport11) protein_coding B-BOX DOMAIN PROTEIN 8 (BBX8) B-BOX DOMAIN PROTEIN 8 (BBX8)		0.562129	0.0128901		0.0753601	0.92292		0.0142338	0.999977		0.217241		UP	-	-	-		-	-	not reported	-
AT5G18540	E3 ubiquitin-protein ligase;(source:Araport11) protein_coding		0.535545	0.0116863		0.0797921	0.894208		0.031954	0.999977		0.215764		UP	-	-	-		-	-	not reported	-
AT4G26520	Aldolase superfamily protein;(source:Araport11) protein_coding FRUCTOSE-BISPHOSPHATE ALDOLASE 7 (FBA7) (ATFBA7);FRUCTOSE-BISPHOSPHATE ALDOLASE 7 (FBA7)		0.844516	0.00566003		-0.191156	0.680374		-0.00659067	0.999977		0.21559		UP	-	-	-		-	-	not reported	-
AT3G18680	Encodes a functional UMP Kinase located in the plastid that binds to group II intron plastid transcription products. Mutants show decreased accumulation of target transcripts/proteins. protein_coding PLASTID 55 UMP KINASE (PUMPKIN) PLASTID 55 UMP KINASE (PUMPKIN)		0.608893	0.00771213		-0.0169465	0.998915		0.0513756	0.999977		0.214441		UP	-	-	-		-	-	not reported	-
AT1G07170	Similar to human splicing factor 3b, 14 kda subunit, SF3b14b. protein_coding		0.630396	0.0125767		-0.156259	0.709593		0.168417	0.976659		0.214185		UP	-	-	-		-	-	not reported	-
AT1G76430	Encodes Pht1;9, a member of the Pht1 family of phosphate transporters which include: Pht1;1/At5g43350, Pht1;2/At5g43370, Pht1;3/At5g43360, Pht1;4/At2g38940, Pht1;5/At2g32830, Pht1;6/At5g43340, Pht1;7/At3g54700, Pht1;8/At1g20860, Pht1;9/At1g76430 (Plant Journal 2002, 31:341). protein_coding PHOSPHATE TRANSPORTER 1;9 (PHT1;9) PHOSPHATE TRANSPORTER 1;9 (PHT1;9)		0.590969	0.0329405		-0.130296	0.843487		0.17806	0.999977		0.212911		UP	-	-	-		-	-	not reported	-
AT1G71420	Tetratricopeptide repeat (TPR)-like superfamily protein;(source:Araport11) protein_coding		0.736034	0.0237847		-0.0512385	0.996257		-0.0482498	0.999977		0.212182		UP	-	-	-		-	-	not reported	-
AT1G06630	F-box/RNI-like superfamily protein;(source:Araport11) protein_coding		0.556266	0.0433302		-0.073146	0.961054		0.149074	0.999977		0.210731		UP	-	-	-		-	-	not reported	-
AT2G40200	basic helix-loop-helix (bHLH) DNA-binding superfamily protein;(source:Araport11) protein_coding		0.741679	0.00280309		-0.0683121	0.937065		-0.0436662	0.999977		0.2099		UP	-	-	-		-	-	not reported	-
AT2G35733	hypothetical protein;(source:Araport11) protein_coding		0.950232	0.0408922		-0.0763724	0.995986		-0.245187	0.999977		0.209558		UP	-	-	-		-	-	not reported	-
AT3G33064	transposable_element_gene;(source:Araport11);similar to unknown protein [Arabidopsis thaliana] (TAIR:AT1G41770.1);(source:TAIR10) transposable_element_gene		0.707519	0.0334846		-0.0289522	0.998915		-0.051623	0.999977		0.208981		UP	-	-	-		-	-	not reported	-
AT2G25570	binding protein;(source:Araport11) protein_coding		0.634042	0.0102704		-0.16271	0.673275		0.155317	0.999977		0.208883		UP	-	-	-		-	-	not reported	-
AT5G55810	encodes a bi-functional enzyme that expresses both nicotinamide-nucleotide adenylyltransferase (2.7.7.1) and nicotinate-nucleotide adenylyltransferase (2.7.7.18)activity. protein_coding NICOTINATE/NICOTINAMIDE MONONUCLEOTIDE ADENYLTRANSFERASE (NMNAT) NICOTINATE/NICOTINAMIDE MONONUCLEOTIDE ADENYLTRANSFERASE (NMNAT)		0.567901	0.0207761		0.0178511	0.998915		0.0396281	0.999977		0.20846		UP	-	-	-		-	-	not reported	-
ATCG01010	Chloroplast encoded NADH dehydrogenase unit. protein_coding (NDHF) (NDHF)		0.645933	0.0168653		-0.0218132	0.998915		-0.0026307	0.999977		0.207163		UP	-	-	-		-	-	not reported	-
AT1G75110	Encodes an arabinosyltransferase that modifies extensin proteins in root hair cells. protein_coding REDUCED RESIDUAL ARABINOSE 2 (RRA2) REDUCED RESIDUAL ARABINOSE 2 (RRA2)		0.647113	0.0189683		-0.0982357	0.912364		0.0700556	0.999977		0.206311		UP	-	-	-		-	-	not reported	-
AT5G13470	hypothetical protein;(source:Araport11) protein_coding		0.549203	0.0271866		0.00679923	0.998933		0.0555663	0.999977		0.203856		UP	-	-	-		-	-	not reported	-
AT2G43480	Peroxidase superfamily protein;(source:Araport11) protein_coding		1.22615	0.00963834		-0.558805	0.274583		-0.0564916	0.999977		0.203619		UP	-	-	-		-	-	not reported	-
AT3G14520	Encodes a sesterterpene synthase responsible for the biosynthesis of the tricyclic sesterterpene (+)-thalianatriene with a 11-6-5 fused ring system. protein_coding TERPENE SYNTHASE 18 (TPS18) TERPENE SYNTHASE 18 (TPS18);SESTERTERPENE SYNTHASE 1 (ATSESTERTPS1); (ATTPS18)		0.89091	0.0309741		-0.0510236	0.998915		-0.231137	0.999977		0.202917		UP	-	-	-		-	-	not reported	-
AT5G42680	MIZU-KUSSEI-like protein (Protein of unknown function, DUF617);(source:Araport11) protein_coding		0.690653	0.00357799		-0.0628928	0.945981		-0.0190822	0.999977		0.202893		UP	-	-	-		-	-	not reported	-
AT3G13020	hAT transposon superfamily protein;(source:Araport11) protein_coding		0.635711	0.00195879		-0.0114585	0.998915		-0.0172203	0.999977		0.202344		UP	-	-	-		-	-	not reported	-
AT3G53270	Small nuclear RNA activating complex (SNAPc), subunit SNAP43 protein;(source:Araport11) protein_coding		0.729049	0.00811661		-0.0156936	0.998915		-0.113392	0.999977		0.199988		UP	-	-	-		-	-	not reported	-
AT1G16480	Tetratricopeptide repeat (TPR)-like superfamily protein;(source:Araport11) protein_coding		0.56622	0.0154928		0.0278491	0.998915		0.00412701	0.999977		0.199399		UP	-	-	-		-	-	not reported	-
AT3G32960	hypothetical protein (DUF1985);(source:Araport11) protein_coding		0.584963	0.0228917		0.0241982	0.998915		-0.0109768	0.999977		0.199395		UP	-	-	-		-	-	not reported	-
AT3G51680	NAD(P)-binding Rossmann-fold superfamily protein;(source:Araport11) protein_coding SHORT-CHAIN DEHYDROGENASE/REDUCTASE 2 (SDR2) SHORT-CHAIN DEHYDROGENASE/REDUCTASE 2 (SDR2); (ATSDR2)		0.853125	0.0185637		-0.436084	0.280285		0.173223	0.999977		0.196755		UP	-	-	-		-	-	not reported	-
AT2G22780	encodes an peroxisomal NAD-malate dehydrogenase that is involved in fatty acid beta-oxidation through providing NAD to the process of converting fatty acyl CoA to acetyl CoA. protein_coding PEROXISOMAL NAD-MALATE DEHYDROGENASE 1 (PMDH1) PEROXISOMAL NAD-MALATE DEHYDROGENASE 1 (PMDH1)		0.57079	0.0297411		-0.0883473	0.925055		0.106995	0.999977		0.196479		UP	-	-	-		-	-	not reported	-
AT1G36320	hypothetical protein;(source:Araport11) protein_coding		0.575238	0.00967977		-0.0415183	0.987358		0.0522299	0.999977		0.195316		UP	-	-	-		-	-	not reported	-
AT3G59440	Encodes an endomembrane localized member of the CML subfamily VII. Contains a canonical CaM domain and unique N-terminal extension that distinguishes it from other members of the subfamily. protein_coding (ATCML4) (ATCML4)		0.573222	0.00940059		0.0666756	0.933541		-0.057607	0.999977		0.194097		UP	-	-	-		-	-	not reported	-
AT3G47560	alpha/beta-Hydrolases superfamily protein;(source:Araport11) protein_coding		0.523347	0.0476838		0.253473	0.47368		-0.194815	0.9445		0.194001		UP	-	-	-		-	-	not reported	-
AT1G50840	DNA Polymerase gamma2. Dual targeting to mitochondria and plastids due to alternative translation initiation. protein_coding POLYMERASE GAMMA 2 (POLGAMMA2) POLYMERASE I A (PolIA);POLYMERASE GAMMA 2 (POLGAMMA2)		0.51743	0.0246165		0.0892915	0.893767		-0.0273959	0.999977		0.193109		UP	-	-	-		-	-	not reported	-
AT5G16860	Tetratricopeptide repeat (TPR)-like superfamily protein;(source:Araport11) protein_coding		0.590601	0.026517		0.0116928	0.998915		-0.0232196	0.999977		0.193025		UP	-	-	-		-	-	not reported	-
AT4G32300	S-domain-2 5;(source:Araport11) protein_coding S-DOMAIN-2 5 (SD2-5) S-DOMAIN-2 5 (SD2-5)		0.601791	0.00500599		0.108425	0.787661		-0.135273	0.980646		0.191648		UP	-	-	-		-	YES	no	-
AT5G38730	Tetratricopeptide repeat (TPR)-like superfamily protein;(source:Araport11) protein_coding		0.542152	0.0484829		0.0649154	0.976971		-0.0334078	0.999977		0.19122		UP	-	-	-		-	-	not reported	-
AT4G15370	Encodes an oxidosqualene cyclase that primarily produces the tetracyclic triterpene baruol in vitro and when expressed in yeast. It can also make 22 other minor triterpenoid products with varying numbers of rings. protein_coding BARUOL SYNTHASE 1 (BARS1) PENTACYCLIC TRITERPENE SYNTHASE 2 (PEN2);BARUOL SYNTHASE 1 (BARS1)		1.06051	0.02864		-0.491341	0.421439		0.00294191	0.999977		0.190703		UP	-	-	-		-	-	not reported	-
AT4G00340	Encodes a receptor-like protein kinase that is expressed in roots. protein_coding RECEPTOR-LIKE PROTEIN KINASE 4 (RLK4) RECEPTOR-LIKE PROTEIN KINASE 4 (RLK4)		0.574808	0.0039265		-0.0977373	0.794816		0.0911851	0.999977		0.189419		UP	-	-	-		-	-	not reported	-
AT1G03730	pyrroline-5-carboxylate reductase;(source:Araport11) protein_coding		0.535113	0.0186631		0.18759	0.558168		-0.154963	0.973067		0.189247		UP	-	-	-		-	YES	no	-
AT3G47840	Tetratricopeptide repeat (TPR)-like superfamily protein;(source:Araport11) protein_coding		0.609987	0.0156602		-0.0408199	0.99465		-0.00483828	0.999977		0.188109		UP	-	-	-		-	-	not reported	-
AT1G19600	pfkB-like carbohydrate kinase family protein;(source:Araport11) protein_coding		0.858064	0.0379851		-0.339186	0.57594		0.0442336	0.999977		0.187704		UP	-	-	-		-	-	not reported	-
AT3G08030	The mRNA of this gene is expressed in viable seeds. Its detection in a dry seed lot has potential for use as a molecular marker for germination performance as absence of expression correlates with decreased germination. protein_coding		0.653795	0.00595626		-0.361877	0.117484		0.270976	0.496975		0.187631		UP	-	-	-		-	-	not reported	-
AT4G36870	Encodes a member of the BEL family of homeodomain proteins. Plants doubly mutant for saw1/saw2 (blh2/blh4) have serrated leaves. BP is expressed in the serrated leaves, therefore saw1/saw2 may act redundantly to repress BP in leaves. protein_coding BEL1-LIKE HOMEODOMAIN 2 (BLH2) BEL1-LIKE HOMEODOMAIN 2 (BLH2);SAWTOOTH 1 (SAW1)		0.924851	0.0228881		-0.341178	0.553417		-0.0291114	0.999977		0.184854		UP	-	-	-		-	-	not reported	-
AT1G02050	Chalcone and stilbene synthase family protein;(source:Araport11) protein_coding LESS ADHESIVE POLLEN 6 (LAP6) POLYKETIDE SYNTHASE A (PKSA);LESS ADHESIVE POLLEN 6 (LAP6)		0.533908	0.015192		-0.0292069	0.998195		0.0474627	0.999977		0.184055		UP	-	-	-		-	-	not reported	-
AT4G08150	A member of class I knotted1-like homeobox gene family (together with KNAT2). Similar to the knotted1 (kn1) homeobox gene of maize. Normally expressed in the peripheral and rib zone of shoot apical meristem but not in the leaf primordia. It is also expressed in the fourth floral whorl, in the region that would become style, particularly in the cell surrounding the transmitting tissue. No expressi…		0.504973	0.0237547		0.058873	0.96032		-0.0123228	0.999977		0.183841		UP	-	-	-		-	-	not reported	-
AT4G21990	Encodes a protein disulfide isomerase-like (PDIL) protein, a member of a multigene family within the thioredoxin (TRX) superfamily. This protein also belongs to the adenosine 5'-phosphosulfate reductase-like (APRL) group. protein_coding APS REDUCTASE 3 (APR3) PAPS REDUCTASE HOMOLOG 26 (PRH26); (PRH-26);APS REDUCTASE 3 (APR3); (ATAPR3)		0.625107	0.0138905		-0.087083	0.917706		0.0127534	0.999977		0.183592		UP	-	-	-		YES	YES	no	-
AT5G39680	Pentatricopeptide repeat (PPR) superfamily protein;(source:Araport11) protein_coding EMBRYO DEFECTIVE 2744 (EMB2744) EMBRYO DEFECTIVE 2744 (EMB2744)		0.624637	0.0309675		-0.0632688	0.982126		-0.0112643	0.999977		0.183368		UP	-	-	-		-	-	not reported	-
AT5G26930	Encodes a member of the GATA factor family of zinc finger transcription factors. Controls lateral root founder cell specification. protein_coding GATA TRANSCRIPTION FACTOR 23 (GATA23) GATA TRANSCRIPTION FACTOR 23 (GATA23)		0.503827	0.0313244		0.0651835	0.953898		-0.0189993	0.999977		0.183337		UP	-	-	-		-	-	not reported	-
AT4G17540	dynamin;(source:Araport11) protein_coding		0.597822	0.00801115		0.117026	0.787559		-0.168145	0.881315		0.182234		UP	-	-	-		-	-	not reported	-
AT4G27530	hypothetical protein;(source:Araport11) protein_coding		0.584963	0.00669214		0.0396803	0.987358		-0.0790111	0.999977		0.181877		UP	-	-	-		-	-	not reported	-
AT5G45790	Ubiquitin carboxyl-terminal hydrolase family protein;(source:Araport11) protein_coding		0.549667	0.0102071		-0.0638429	0.936859		0.0587786	0.999977		0.181534		UP	-	-	-		-	-	not reported	-
AT3G63350	member of Heat Stress Transcription Factor (Hsf) family protein_coding (AT-HSFA7B) (AT-HSFA7B);HEAT SHOCK TRANSCRIPTION FACTOR A7B (HSFA7B)		0.718703	0.00942944		-0.186838	0.657901		0.0108202	0.999977		0.180895		UP	-	-	-		-	-	not reported	-
AT2G19150	Pectin lyase-like superfamily protein;(source:Araport11) protein_coding		0.701431	0.0401947		-0.10435	0.940623		-0.0557044	0.999977		0.180459		UP	-	-	-		-	-	not reported	-
AT2G05630	in the Arabidopsis autophagy pathway protein_coding (ATG8D) (ATG8D)		0.51531	0.0171038		-0.057913	0.955676		0.0820388	0.999977		0.179812		UP	-	-	-		-	-	not reported	-
AT5G15300	Pentatricopeptide repeat (PPR) superfamily protein;(source:Araport11) protein_coding		0.533824	0.0304927		0.0196278	0.998915		-0.0181162	0.999977		0.178445		UP	-	-	-		-	-	not reported	-
AT5G47070	Encodes a member of the RLCK VII-4 subfamily of receptor-like cytoplasmic kinases that has been shown to phosphorylate MAPKKK5 Ser-599 and MEKK1 Ser-603, both players in PRR-mediated resistance to bacterial and fungal pathogens. protein_coding PBS1-LIKE 19 (PBL19) PBS1-LIKE 19 (PBL19)		0.862057	0.0446903		-0.382398	0.525751		0.055358	0.999977		0.178339		UP	-	-	-		-	-	not reported	-
AT1G56610	Protein with RNI-like/FBD-like domain;(source:Araport11) protein_coding		0.543776	0.0176306		-0.0124396	0.998915		-0.00108589	0.999977		0.17675		UP	-	-	-		-	-	not reported	-
AT1G70310	Spermidine synthase. protein_coding SPERMIDINE SYNTHASE 2 (SPDS2) SPERMIDINE SYNTHASE 2 (SPDS2)		0.506917	0.0352988		-0.096564	0.887081		0.119526	0.999977		0.176627		UP	-	-	-		-	-	not reported	-
AT5G45930	encodes a second Chl I gene (CHLI2), a subunit of magnesium chelatase which is required for chlorophyll biosynthesis. Has ATPase activity, regulated by TRX-f. Involved in the assembly of the Mg chelatase complex. protein_coding MAGNESIUM CHELATASE I2 (CHLI2) MAGNESIUM CHELATASE I2 (CHLI2); (CHLI-2); (CHL I2)		0.78041	0.00486225		-0.195863	0.614251		-0.0555183	0.999977		0.176343		UP	-	-	-		-	-	not reported	-
AT4G10390	Protein kinase superfamily protein;(source:Araport11) protein_coding		0.650676	0.0123922		-0.0550538	0.981771		-0.0684074	0.999977		0.175738		UP	-	-	-		-	-	not reported	-
AT1G07390	receptor like protein 1;(source:Araport11) protein_coding RECEPTOR LIKE PROTEIN 1 (RLP1) RECEPTOR LIKE PROTEIN 1 (RLP1);RECEPTOR LIKE PROTEIN 1 (AtRLP1)		0.634374	0.0142236		-0.161927	0.706702		0.0520405	0.999977		0.174829		UP	-	-	-		-	-	not reported	-
AT4G37670	N-acetyl-l-glutamate synthase 2;(source:Araport11) protein_coding N-ACETYL-L-GLUTAMATE SYNTHASE 2 (NAGS2) N-ACETYL-L-GLUTAMATE SYNTHASE 2 (NAGS2)		0.690749	0.0108848		0.0276865	0.998915		-0.194092	0.923221		0.174781		UP	-	-	-		-	-	not reported	-
AT5G55000	FH protein interacting protein FIP2 protein_coding (FIP2) (FIP2)		0.504528	0.0413216		-0.100167	0.885815		0.11841	0.999977		0.174257		UP	-	-	-		-	-	not reported	-
AT1G05710	basic helix-loop-helix (bHLH) DNA-binding superfamily protein;(source:Araport11) protein_coding		1.07373	0.00300246		-0.309645	0.464161		-0.244708	0.910995		0.173126		UP	-	-	-		-	-	not reported	-
AT5G44390	FAD-binding Berberine family protein;(source:Araport11) protein_coding (ATBBE25) (ATBBE25)		1.18378	0.00335621		-0.525192	0.175449		-0.14138	0.999977		0.172402		UP	-	-	-		-	YES	no	-
AT3G61920	UvrABC system protein C;(source:Araport11) protein_coding		0.584963	0.0282974		0.0284578	0.998915		-0.0963404	0.999977		0.17236		UP	-	-	-		-	-	not reported	-
AT5G02680	methionine-tRNA ligase;(source:Araport11) protein_coding		0.555681	0.0472619		-0.0930899	0.928621		0.0494482	0.999977		0.17068		UP	-	-	-		-	-	not reported	-
AT5G55740	Encodes a member of the E+ subgroup of the PPR protein family, containing the E and E+ motifs following a tandem array of PPR motifs. It also contains an unknown motif consisting of 15 aa, which is highly conserved in some PPR proteins, including CRR4. CRR21 is involved in RNA editing of the site 2 of ndhD (ndhD-2),which encodes a subunit of the NDH complex. The RNA editing changes aa 128 from Se…		0.680304	0.0242992		-0.129915	0.864654		-0.0387738	0.999977		0.170538		UP	-	-	-		-	-	not reported	-
AT1G72280	endoplasmic reticulum oxidoreductin protein_coding ENDOPLASMIC RETICULUM OXIDOREDUCTINS 1 (ERO1) ENDOPLASMIC RETICULUM OXIDOREDUCTINS 1 (AERO1);ENDOPLASMIC RETICULUM OXIDOREDUCTINS 1 (ERO1)		0.6342	0.0180126		0.00883943	0.998933		-0.138692	0.999977		0.168116		UP	-	-	-		-	-	not reported	-
AT4G08210	Pentatricopeptide repeat (PPR-like) superfamily protein;(source:Araport11) protein_coding		0.615993	0.0103978		-0.0987672	0.867083		-0.0149895	0.999977		0.167412		UP	-	-	-		-	-	not reported	-
AT3G15420	Transcription factor TFIIIC, tau55-related protein;(source:Araport11) protein_coding		0.588392	0.0220412		0.0567372	0.981522		-0.151498	0.999977		0.164544		UP	-	-	-		-	-	not reported	-
AT1G53450	epstein-barr nuclear antigen;(source:Araport11) protein_coding		0.763171	0.00103505		-0.00219267	0.9993		-0.275442	0.365865		0.161846		UP	-	-	-		-	-	not reported	-
AT3G22150	Involved in RNA editing of plastid atpF and mitochondrial nad5. protein_coding ATPF EDITING FACTOR 1 (AEF1) ATPF EDITING FACTOR 1 (AEF1)		0.657473	0.0148751		-0.0614308	0.976532		-0.113096	0.999977		0.160982		UP	-	-	-		-	-	not reported	-
AT1G23910	Polyketide cyclase/dehydrase and lipid transport superfamily protein;(source:Araport11) protein_coding		0.758924	0.0227589		-0.164374	0.824164		-0.111744	0.999977		0.160935		UP	-	-	-		-	-	not reported	-
AT3G17020	Adenine nucleotide alpha hydrolases-like superfamily protein;(source:Araport11) protein_coding		0.504899	0.0356825		-0.0887313	0.909183		0.0662158	0.999977		0.160795		UP	-	-	-		-	-	not reported	-
AT5G18550	Zinc finger C-x8-C-x5-C-x3-H type family protein;(source:Araport11) protein_coding		0.577199	0.00947614		0.0779761	0.908652		-0.178392	0.828044		0.158928		UP	-	-	-		-	-	not reported	-
AT5G26570	chloroplastidic phosphoglucan, water dikinase (PWD) which is required for normal degradation of leaf starch in Arabidopsis. NMR analysis of the mutants, suggests that the gene is specifically involved in the phosphorylation of the glucosyl residues of starch at the C3 position. protein_coding PHOSPHOGLUCAN WATER DIKINASE (PWD) PHOSPHOGLUCAN WATER DIKINASE (PWD); (ATGWD3); (OK1)		0.550675	0.043149		-0.0974668	0.917559		0.0228375	0.999977		0.158682		UP	-	-	-		-	-	not reported	-
[truncated: 2,427 more rows]

## Sheet: Das dataset
Das 2016				logFC								p-value
				Ethylene				Shade				Ethylene				Shade				DE Summary
[truncated: 7,249 more rows]

## Sheet: Notes
All	logFCs in base 2
[truncated: 7 more rows]
